# Supplementary material for: Efficient synthesis of P-chiral biaryl phosphonates by stereoselective intramolecular cyclization
Source: Royal Society of Chemistry journal article supplement (doi:10.1039/c5qo00142k), 2015-01-01
Supplement: c5qo00142k1.pdf [file c5qo00142k1.pdf]

Supporting Information  
for  
**Synthesis of P-Chiral Phosphonates by Stereoselective  
Intramolecular Cyclization**

Guangqing Xu,<sup>‡</sup> Minghong Li,<sup>‡</sup> Shouliang Wang,<sup>‡</sup> Wenjun Tang<sup>\*‡</sup>

<sup>‡</sup>State Key Laboratory of Bio-organic and Natural Products Chemistry, Shanghai  
Institute of Organic Chemistry, Chinese Academy of Sciences, 345 Lingling Lu,  
Shanghai 200032, China  
E-mail: [tangwenjun@sioc.ac.cn](mailto:tangwenjun@sioc.ac.cn)

**Table of contents**

|                                                                                                      |            |
|------------------------------------------------------------------------------------------------------|------------|
| 1. <b>General information and materials</b> .....                                                    | <b>S2</b>  |
| 2. <b>Synthetic procedures of ligands L1-L6</b> .....                                                | <b>S2</b>  |
| 3. <b>Synthetic procedures of Substrates</b> .....                                                   | <b>S4</b>  |
| 4. <b>General procedure of intramolecular cyclization for construction P-chiral<br/>center</b> ..... | <b>S9</b>  |
| 5. <b>Experimental procedure for the reactions in Scheme 2</b> .....                                 | <b>S15</b> |
| 6. <b>References</b> .....                                                                           | <b>S18</b> |
| 7. <b>X-ray of 2f</b> .....                                                                          | <b>S19</b> |
| 8. <b>NMR Spectra</b> .....                                                                          | <b>S20</b> |
| 9. <b>HPLC Charts</b> .....                                                                          | <b>S86</b> |

## 1. General information and materials:

$^1\text{H}$ ,  $^{31}\text{P}$ ,  $^{19}\text{F}$  and  $^{13}\text{C}$  NMR data were recorded on a Bruker DRX500, DRX400. NMR Spectrometer with  $\text{CDCl}_3$  as the solvent.  $^{31}\text{P}$  shifts were referenced to 85%  $\text{H}_3\text{PO}_4$  in  $\text{D}_2\text{O}$  at 0.0 ppm as external standard and obtained with  $^1\text{H}$  decoupling.  $^{13}\text{C}$  shifts were obtained with  $^1\text{H}$  decoupling. MS was measured on Agilent 1100 Series LC/MSD mass spectrometer. Enantiomeric excess was determined by chiral HPLC (Agilent Series 1260). Column chromatography was performed with silica gel (300-400 mesh).

All reagents were used as received from commercial sources, unless otherwise specified, or prepared as described in the literature. All solvents were dried and stored under  $\text{N}_2$ . All reagents were weighed and handled in air and refilled with nitrogen.

Abbreviations in this text: PE = petroleum ether; EA = ethyl acetate; DCM = dichloromethane;

## 2. Synthetic procedures of ligands L1-L6

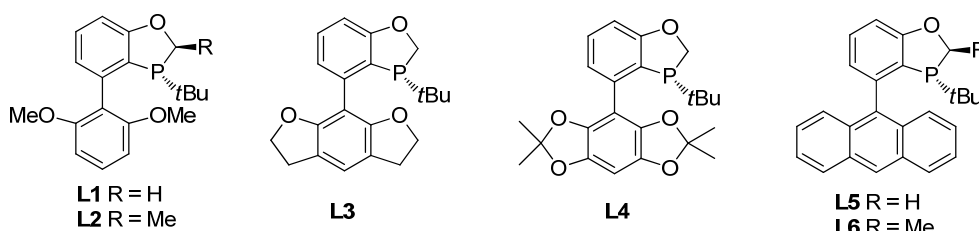

The synthesis of **L1** and **L2** were followed according to procedures described in our previous report: (1) W. Tang, A. G. Capacci, X. Wei, W. Li, A. White, N. D. Patel, J. Savoie, J. Gao, S. Rodriguez, B. Qu, N. Haddad, B. Z. Lu, D. Krishnamurthy, N. K. Yee and C. H. Senanayake, *Angew. Chem., Int. Ed.* 2010, **49**, 5879. (2) W. Tang, N. D. Patel, G. Xu, X. Xu, J. Savoie, S. Ma, M.-H. Hao, S. Keshipeddy, A. G. Capacci, X. Wei, Y. Zhang, J. Gao, W. Li, S. Rodriguez, B. Z. Lu, N. K. Yee and C. H. Senanayake, *Org. Lett.* 2012, **14**, 2258.

The syntheses of **L5** and **L6** were followed according to procedures described in our previous report: (3) W. Tang, S. Keshipeddy, Y. Zhang, X. Wei, J. Savoie, N. D. Patel, N. K. Yee and C. H. Senanayake, *Org. Lett.* 2011, **13**, 1366. (4) G. Xu, W. Fu, G. Liu, C. H. Senanayake and W. Tang, *J. Am. Chem. Soc.* 2014, **136**, 570.

### Synthesis of **L3**:

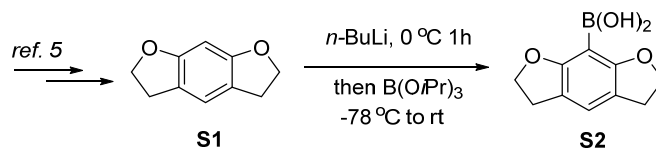

Compound **S1** was synthesized according to the procedure described in reference 5: J. C. González-Gómez, L. Santana and E. Uriarte, *Tetrahedron* 2005, **61**, 4805.

Synthesis of boronic acid **S2**: To a solution of **S1** (2.5g, 15.4 mmol, 1.0 equiv) in THF (150 mL) was added  $n\text{-BuLi}$  (6.9 mL, 2.5 M in hexane, 1.1 equiv) dropwise at  $0^\circ\text{C}$  over 15 min. After stirred at  $0^\circ\text{C}$  for 1 h, the mixture was cooled to  $-78^\circ\text{C}$  and  $\text{B(OiPr)}_3$  (7.1 mL, 30.8 mmol, 2.0 equiv) was added, the resulting mixture was stirred for further 30 min before warmed to room temperature, then saturated  $\text{NH}_4\text{Cl}$  solution (30 mL) was added and the aqueous phase was extracted by EtOAc

(20 mL X 2), the organic phase was washed with H<sub>2</sub>O (20 mL X 2) and brine (15 mL), dried over sodium sulfate, concentrated and purified by silica gel column chromatography (eluent: PE/EA, 2/1) to provide boronic acid **S2** (2.1 g, 10.2mmol, 68 %) as white solid. **S2**: <sup>1</sup>H NMR (400 MHz, CDCl<sub>3</sub>) δ 7.07 (s, 1H), 6.16 (s, 2H), 4.65 (t, *J* = 8.6 Hz, 4H), 3.11 (t, *J* = 8.4 Hz, 4H).

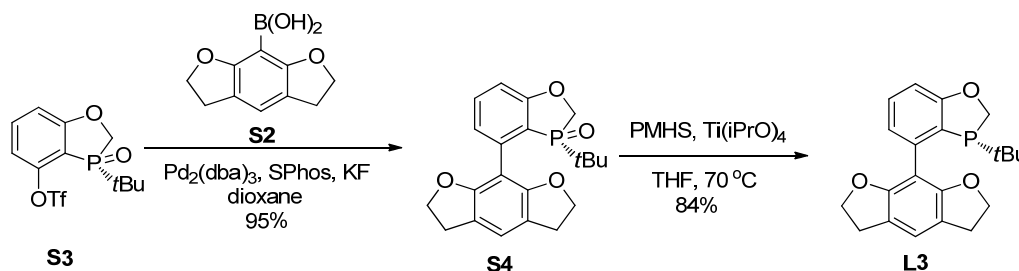

Synthesis of **S4**: To a mixture of **S3** (400 mg, 1.12 mmol, 1.0 equiv), **S2** (692 mg, 3.36 mmol, 3.0 equiv), Pd<sub>2</sub>(dba)<sub>3</sub> (31 mg, 0.034 mmol, 3%), SPhos (28 mg, 0.067 mmol, 6%) and KF (260 mg, 4.48 mmol, 4.0 equiv) was charged dried dioxane (5 mL). The mixture was stirred under N<sub>2</sub> for 12h at 100 °C, concentrated, partitioned with water (10 mL) and DCM (20 mL), the organic phase was wash with brine and dried over sodium sulfate, concentrated, and purified by silica gel column chromatography (eluent: EtOAc) to provide **S4** (394 mg, 1.06 mmol, 95%) as white solid. **S4**: <sup>1</sup>H NMR (400 MHz, CDCl<sub>3</sub>) δ 7.44 (t, *J* = 8.0 Hz, 1H), 6.93-6.96 (m, 2H), 6.86 (dd, *J* = 7.7, 2.6 Hz, 1H), 4.33-4.65 (m, 6H), 3.01-3.17 (m, 4H), 0.88 (d, *J* = 16.0 Hz, 9H). <sup>13</sup>C NMR (101 MHz, CDCl<sub>3</sub>) δ 165.4 (d, *J* = 19.6 Hz), 158.2, 157.2, 136.3 (d, *J* = 5.4 Hz), 134.6, 124.4 (d, *J* = 8.2 Hz), 120.5, 119.3, 117.5, 114.5 (d, *J* = 90.9 Hz), 113.2 (d, *J* = 5.4 Hz), 106.9, 72.3 (d, *J* = 13.4 Hz), 65.5, 64.9, 33.3 (d, *J* = 72.1 Hz), 29.6, 29.4, 23.8. <sup>31</sup>P NMR (162 MHz, CDCl<sub>3</sub>) δ 62.4. ESI-MS: *m/z* 371.6 [M+H]<sup>+</sup>.

Synthesis of **L3**: To a solution of compound **S4** (400mg, 1.1mmol, 1.0 equiv) in THF (5 mL) at rt was added PMHS (2.5 g) and Ti(OiPr)<sub>4</sub> (1.4 mL, 4.7mmol, 4.3 equiv). The mixture was stirred at reflux for 12 h, and then concentrated under vacuum to remove most THF. 30% aqueous NaOH solution (10 mL) was carefully added to the residue. Gas was generated during addition. The resulting mixture was further stirred at 60 °C for 0.5 h. To the mixture at rt was added ether (8mL X 4). The ether layer was separated and the aqueous layer was further washed with ether (4 mL) under nitrogen. The combined ether solution was dried, concentrated, and purified by passing through a neutral alumina plug to afford the desired product **L3** (326mg, 0.67mmol, 84%) as white solid. **L3**: [α]<sub>D</sub><sup>25</sup> = 176.7° (*c* = 0.2, CHCl<sub>3</sub>); <sup>1</sup>H NMR (500 MHz, CDCl<sub>3</sub>) δ 7.34 (t, *J* = 7.8 Hz, 1H), 6.99 (s, 1H), 6.97 (dd, *J* = 7.6, 2.9 Hz, 1H), 6.88 (d, *J* = 8.1 Hz, 1H), 4.84 (dd, *J* = 12.6, 1.5 Hz, 1H), 4.55-4.66 (m, 4H), 4.41 (q, *J* = 8.9 Hz, 1H), 3.08-3.22(m, 4H), 0.76 (d, *J* = 12.0 Hz, 9H). <sup>13</sup>C NMR (126 MHz, CDCl<sub>3</sub>) δ 163.6, 157.6, 156.6, 136.7 (d, *J* = 17.6 Hz), 131.1, 124.0 (d, *J* = 15.0 Hz), 122.8 (d, *J* = 3.8 Hz), 119.7, 118.9, 118.1, 110.1, 109.1, 72.1, 72.0, 70.1 (d, *J* = 27.7 Hz), 31.1 (d, *J* = 18.9 Hz), 29.7, 26.5 (d, *J* = 13.8 Hz). <sup>31</sup>P NMR (162 MHz, CDCl<sub>3</sub>) δ -8.2. ESI-MS: *m/z* 355.3 [M+H]<sup>+</sup>, 377.4 [M+Na]<sup>+</sup>; HRMS (ESI) calculated for [M+H, C<sub>21</sub>H<sub>24</sub>O<sub>3</sub>P]<sup>+</sup>: 355.1458; found: 355.1459.

## Synthesis of L4

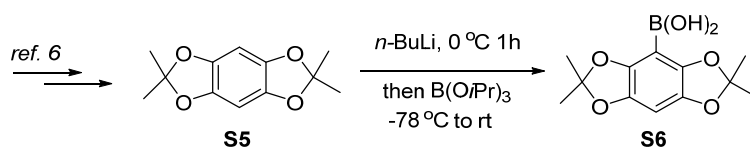

Compound **S5** was synthesized according to the procedures described in reference 6: T. J. Reddy, T. Iwama, H. J. Halpern and V. H. Rawal, *J. Org. Chem.* 2002, **67**, 4635

Synthesis of boronic acid **S6**: To a solution of **S5** (2.0 g, 9.1 mmol, 1.0 equiv) in THF (50 mL) was added dropwise  $n\text{-BuLi}$  (4.3 mL, 2.5 M in Hexane, 10.8 mmol, 1.2 equiv) at 0 °C over 15 min. After stirred at 0 °C for 1 h, the mixture was cooled to -78 °C and  $\text{B(OiPr)}_3$  (8.4 mL, 36.4 mmol, 4.0 equiv) was added. The resulting mixture was stirred for 30 min and then warmed to room temperature. Saturated  $\text{NH}_4\text{Cl}$  solution (20 mL) was added and the organic phase was separated. The aqueous phase was washed by EtOAc (10 mL X 2) and the combined organic phase was washed with  $\text{H}_2\text{O}$  (10 mL X 2) and brine (10 mL), dried over sodium sulfate, concentrated, and purified by silica gel column chromatography (eluent: PE/EA, 3/1) to provide boronic acid **S6** (1.53 g, 5.75 mmol, 64%) as white solid. **S6**:  $^1\text{H NMR}$  (400 MHz, DMSO)  $\delta$  7.98 (s, 2H), 6.45 (s, 1H), 1.53 (s, 12 H).

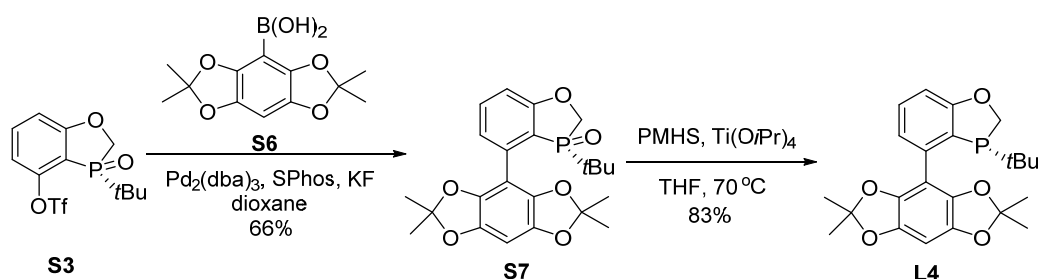

### Synthesis of S7

The procedure was similar to that described for the synthesis of **S4**. **S7**: white solid. 66% yield.  $^1\text{H NMR}$  (500 MHz,  $\text{CDCl}_3$ )  $\delta$  7.48 (t,  $J = 7.8$  Hz, 1H), 6.97 (dd,  $J = 7.5, 3.3$  Hz, 1H), 6.94 (dd,  $J = 8.5, 3.1$  Hz, 1H), 6.34 (s, 1H), 4.50 (dd,  $J = 13.8, 2.0$  Hz, 1H), 4.42 (dd,  $J = 13.8, 10.2$  Hz, 1H), 1.75 (s, 3H), 1.64 (s, 3H), 1.62 (s, 3H), 1.54 (s, 3H), 1.00 (d,  $J = 16.0$  Hz, 9H).  $^{13}\text{C NMR}$  (126 MHz,  $\text{CDCl}_3$ )  $\delta$  165.7 (d,  $J = 18.9$  Hz), 140.7, 139.6, 139.2, 138.3, 134.6 (d,  $J = 1.3$  Hz), 134.1 (d,  $J = 6.3$  Hz), 124.6 (d,  $J = 7.8$  Hz), 119.1, 117.9, 114.2 (d,  $J = 89.4$  Hz), 113.9 (d,  $J = 5.0$  Hz), 107.1, 92.5, 65.7 (d,  $J = 60.4$  Hz), 33.3 (d,  $J = 71.8$  Hz), 26.0 (d,  $J = 21.4$  Hz), 25.6, 24.2.  $^{31}\text{P NMR}$  (162 MHz,  $\text{CDCl}_3$ )  $\delta$  61.4. ESI-MS:  $m/z$  431.3  $[\text{M}+\text{H}]^+$ , 453.4  $[\text{M}+\text{Na}]^+$ .

### Synthesis of L4

The procedure was similar to that described for the synthesis of **L3**. **L4**: white solid. 83% yield.  $[\alpha]_D^{25} = 169.6^\circ$  ( $c = 0.25$ ,  $\text{CHCl}_3$ );  $^1\text{H NMR}$  (500 MHz,  $\text{CDCl}_3$ )  $\delta$  7.34 (t,  $J = 7.8$  Hz, 1H), 6.98 (dd,  $J = 7.5, 3.1$  Hz, 1H), 6.92 (dd,  $J = 8.1, 0.6$  Hz, 1H), 6.35 (s, 1H), 4.84 (dd,  $J = 12.6, 1.8$  Hz, 1H), 4.58 (dd,  $J = 25.8, 12.6$  Hz, 1H), 1.72 (s, 6 H), 1.59 (br, 6H), 0.80 (d,  $J = 12.0$  Hz, 9H).  $^{13}\text{C NMR}$  (126 MHz,  $\text{CDCl}_3$ )  $\delta$  163.8, 135.2 (d,  $J = 17.6$  Hz), 131.1, 124.2 (d,  $J = 18.9$  Hz), 122.9 (d,  $J = 5.0$  Hz), 117.9, 110.5, 109.4, 91.9, 70.2 (d,  $J = 29.0$  Hz), 31.4 (d,  $J = 18.9$  Hz), 26.8 (d,  $J = 15.1$  Hz), 25.8 (br).  $^{31}\text{P NMR}$  (162 MHz,  $\text{CDCl}_3$ )  $\delta$  -8.8. ESI-MS:  $m/z$  415.5  $[\text{M}+\text{H}]^+$ . HRMS (ESI) calculated for  $[\text{M}+\text{H}, \text{C}_{23}\text{H}_{28}\text{O}_5\text{P}]^+$ : 415.1669; found: 415.1668.

### 3. Synthetic procedures of Substrates

#### Procedure A:

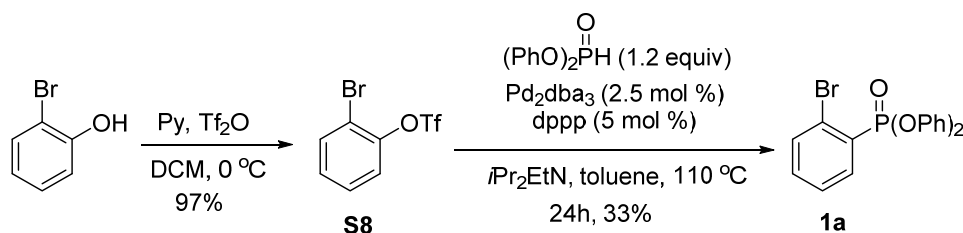

#### Synthesis of **1a**

To a solution of 2-bromophenol (7.5 g, 43.1 mmol) and pyridine (4.2 mL, 51.7 mmol) in DCM (50 mL) at 0 °C was charged Tf<sub>2</sub>O (8.0 mL, 47.4 mmol). The resulting mixture was stirred for further 20 min and then quenched with water (50 mL). The DCM layer was separated, washed with water (50 mL X 2) and brine (25 mL), dried over sodium sulfate, concentrated, and purified by silica gel column chromatography (eluent: PE/DCM, 5/1) to give the desired product **S8** (12.7 g, 97%) as colorless oil. **S8**: <sup>1</sup>H NMR (400 MHz, CDCl<sub>3</sub>) δ 7.69 (dd, *J* = 8.0, 1.5 Hz, 1H), 7.34-7.42 (m, 2H), 7.24-7.28 (m, 1H).

To a mixture of **S8** (3.0 g, 9.8 mmol), (PhO)<sub>2</sub>P(O)H (2.8 g, 11.8 mmol), *i*Pr<sub>2</sub>EtN (2.6 mL, 14.8 mmol), Pd<sub>2</sub>dba<sub>3</sub> (225 mg, 0.25 mmol) and dppp (203 mg, 0.49 mmol) was charged toluene (20 mL). The mixture was stirred at 110 °C for 24 h and then cooled to rt. Water (30 mL) was added and the toluene was separated. The organic phase was washed with water (30 mL X 2) and brine (25 mL), dried over sodium sulfate, concentrated, and purified by silica gel column chromatography (eluent: PE/EA, 10/1 then 5/1) to give the desired product **1a** (1.26 g, 33% yield) as white solid. **1a**: <sup>1</sup>H NMR (500 MHz, CDCl<sub>3</sub>) δ 8.23-8.13 (m, 1H), 7.73 (dd, *J* = 8.6, 5.1 Hz, 1H), 7.46-7.36 (m, 2H), 7.28 (m, 8H), 7.16 (d, *J* = 5.4 Hz, 2H); <sup>13</sup>C NMR (125 MHz, CDCl<sub>3</sub>) δ 150.2 (d, *J* = 7.5 Hz), 137.2 (d, *J* = 8.7 Hz), 134.6 (d, *J* = 11.2 Hz), 134.5 (d, *J* = 3.7 Hz), 129.7, 128.0 (d, *J* = 197.5 Hz), 127.1 (d, *J* = 15.0 Hz), 125.4 (d, *J* = 3.7 Hz), 125.3 (d, *J* = 1.2 Hz), 120.6 (d, *J* = 5.0 Hz); <sup>31</sup>P NMR (162 MHz, CDCl<sub>3</sub>) δ 7.7; ESI-MS: *m/z* 389.1 [M+H]<sup>+</sup>; HRMS (ESI) calculated for [M+H, C<sub>18</sub>H<sub>15</sub>BrO<sub>3</sub>P]<sup>+</sup>: 388.9937; found: 388.9940.

Preparation of **1c**, **1k**, **1n** was carried out according to a procedure similar to that for the synthesis of **1a** with its related arylphenol.

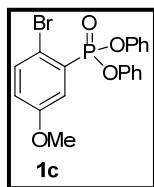

**1c**: White solid. 31% yield. <sup>1</sup>H NMR (500 MHz, CDCl<sub>3</sub>) δ 7.70 (dd, *J* = 16.7, 3.1 Hz, 1H), 7.61 (dd, *J* = 8.7, 6.7 Hz, 1H), 7.35-7.24 (m, 8H), 7.16 (t, *J* = 7.1 Hz, 2H), 6.96 (dd, *J* = 8.8, 3.1 Hz, 1H), 3.80 (s, 3H); <sup>13</sup>C NMR (125 MHz, CDCl<sub>3</sub>) δ 158.5 (d, *J* = 18.2 Hz), 150.2 (d, *J* = 7.6 Hz), 135.5 (d, *J* = 14.1 Hz), 129.7, 128.5 (d, *J* = 195.0 Hz), 125.3 (d, *J* = 1.2 Hz), 122.0 (d, *J* = 10.6 Hz), 121.0 (d, *J* = 3.1 Hz), 120.6 (d, *J* = 4.7 Hz), 115.3 (d, *J* = 3.2 Hz), 55.7; <sup>31</sup>P NMR (162 MHz, CDCl<sub>3</sub>) δ 7.6; ESI-MS: *m/z* 440.8 [M+Na]<sup>+</sup>; HRMS (ESI) calculated for [M+Na; C<sub>19</sub>H<sub>16</sub>BrNaO<sub>4</sub>P]<sup>+</sup>: 440.9862; found: 440.9867.

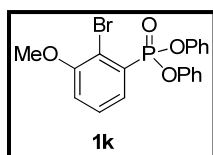

**1k**: Colorless oil. 32% yield.  $^1\text{H NMR}$  (500 MHz,  $\text{CDCl}_3$ )  $\delta$  7.78 (dd,  $J = 14.5$ , 7.6 Hz, 1H), 7.28-7.37 (m, 9H), 7.12-7.15 (m, 2H), 7.08 (d,  $J = 8.1$  Hz, 1H), 3.89 (s, 3H);  $^{13}\text{C NMR}$  (125 MHz,  $\text{CDCl}_3$ )  $\delta$  156.7 (d,  $J = 16.2$  Hz), 150.3 (d,  $J = 7.5$  Hz), 129.7, 129.5 (d,  $J = 195.0$  Hz), 128.8 (d,  $J = 8.7$  Hz), 128.3 (d,  $J = 17.5$  Hz), 125.2 (d,  $J = 1.2$  Hz), 120.6 (d,  $J = 3.7$  Hz), 116.6 (d,  $J = 2.5$  Hz), 115.0 (d,  $J = 5.0$  Hz), 56.6;  $^{31}\text{P NMR}$  (162 MHz,  $\text{CDCl}_3$ )  $\delta$  7.7; ESI-MS:  $m/z$  419.1  $[\text{M}+\text{H}]^+$ ; HRMS (ESI) calculated for  $[\text{M}+\text{Na}; \text{C}_{19}\text{H}_{16}\text{BrNaO}_4\text{P}]^+$ : 440.9862; found: 440.9861.

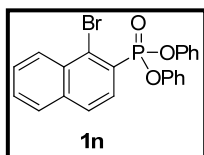

**1n**: White solid. 74% yield.  $^1\text{H NMR}$  (500 MHz,  $\text{CDCl}_3$ )  $\delta$  8.55 (d,  $J = 1.3$  Hz, 1H), 8.18 (m, 1H), 7.90 (m, 2H), 7.70 (m, 2H), 7.30 (m, 8H), 7.15 (m, 2H);  $^{31}\text{P NMR}$  (162 MHz,  $\text{CDCl}_3$ )  $\delta$  8.4; ESI-MS:  $m/z$  439.4  $[\text{M}+\text{H}]^+$ ; HRMS (ESI) calculated for  $[\text{M}+\text{Na}; \text{C}_{22}\text{H}_{16}\text{BrNaO}_3\text{P}]^+$ : 460.9913; found: 460.9911.

### Procedure B:

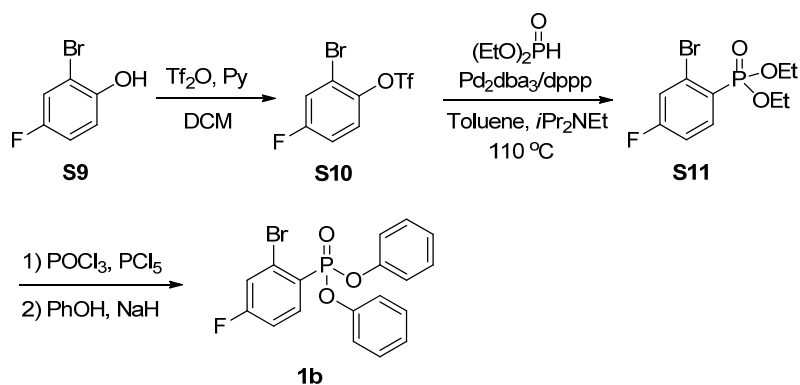

The synthesis of **S10** was carried out according to a procedure similar to that for the synthesis of **S8**.

To a mixture of **S8** (2.0 g, 6.2 mmol),  $(\text{EtO})_2\text{POH}$  (1.0 g, 7.4 mmol),  $i\text{Pr}_2\text{NEt}$  (1.6 mL, 9.3 mmol),  $\text{Pd}_2\text{dba}_3$  (56 mg, 0.06 mmol),  $\text{dppp}$  (51 mg, 0.12 mmol) was charged toluene (20 mL). The mixture was stirred at 110 °C for 24 h and then cooled to rt. Water (30 mL) was added and the toluene layer was separated. The organic phase was washed with water (30 mL X 2) and brine (25 mL), dried over sodium sulfate, concentrated, and purified by silica gel column chromatography (eluent: PE/EA, 10/1 then 2/1) to give the desired product **S11** (1.11 g, 58% yield) as colorless oil. To a mixture of **S11** (1.87g, 6.03 mmol) and  $\text{PCl}_5$  (2.5 g, 12.06 mmol) was charged  $\text{POCl}_3$  (4 mL) in sealed tube, the mixture was heated at 170 °C for 2 h and then cooled to rt, concentrated in vacuum to removed most of the  $\text{POCl}_3$ . The residue was dissolved in THF (5 mL) to provide the phosphorus oxychloride solution. To a separated flask was charged  $\text{PhOH}$  (1.03 g, 10.85 mmol) and THF (10 mL).  $\text{NaH}$  (60%, 482 mg, 12.06 mmol) was added into the solution at 0 °C and the resulting mixture was stirred for 20 min before added to the aforementioned phosphorus oxychloride solution. The resulting mixture was stirred at rt for 1 h and then quenched with saturated  $\text{NH}_4\text{Cl}$  solution.  $\text{EtOAc}$  (20 mL) was added and the organic phase was separated, washed with water (25 mL X 2) and brine (15 mL), dried over sodium sulfate, concentrated, and purified by silica gel column chromatography (eluent: PE/EA, 5/1 then 2/1) to give the desired product **1b** (538 mg, 22%) as yellow solid. **1b**:  $^1\text{H NMR}$  (500 MHz,  $\text{CDCl}_3$ )  $\delta$  8.19 (m, 1H), 7.50 (m, 1H), 7.32 (m, 4H), 7.26 (m, 4H), 7.17 (m, 3 H);  $^{13}\text{C NMR}$  (125 MHz,  $\text{CDCl}_3$ )  $\delta$  165.1 (dd,  $J = 259.7$ , 3.8 Hz), 150.1 (d,  $J = 7.5$  Hz), 139.4 (dd,

$J = 10.5, 9.7$  Hz), 129.8, 126.5 (dd,  $J = 9.9, 5.2$  Hz), 125.4 (d,  $J = 1.2$  Hz), 124.1 (dd,  $J = 202.0, 3.4$  Hz), 122.3 (dd,  $J = 24.5, 13.1$  Hz), 120.5 (d,  $J = 4.7$  Hz), 114.7 (dd,  $J = 20.8, 15.7$  Hz);  $^{31}\text{P}$  NMR (162 MHz,  $\text{CDCl}_3$ )  $\delta$  6.9; ESI-MS:  $m/z$  407.2  $[\text{M}+\text{H}]^+$ ; HRMS (ESI) calculated for  $[\text{M}+\text{Na}; \text{C}_{18}\text{H}_{13}\text{FBrNaO}_3\text{P}]^+$ : 428.9662; found: 428.9660.

Other substrates were prepared according to procedure B with various substituted phenols. The yields were calculated on the basis of phenols.

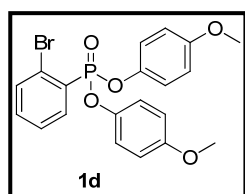

**1d**: Yellow solid. 17% yield.  $^1\text{H}$  NMR (500 MHz,  $\text{CDCl}_3$ )  $\delta$  8.14 (m, 1H), 7.75 (m, 1H), 7.43 (m, 2H), 7.21 (m, 4H), 6.80 (m, 4H), 3.76 (s, 6H);  $^{13}\text{C}$  NMR (125 MHz,  $\text{CDCl}_3$ )  $\delta$  156.9, 152.9, 151.0, 143.6 (d,  $J = 8.7$  Hz), 137.3 (d,  $J = 7.5$  Hz), 137.2 (d,  $J = 10.0$  Hz), 134.5 (d,  $J = 27.5$  Hz), 127.7 (d,  $J = 196.0$  Hz), 127.2 (d,  $J = 15.0$  Hz), 125.3 (d,  $J = 3.7$  Hz), 121.4 (d,  $J = 16.2$  Hz), 114.6 (d,  $J = 8.7$  Hz), 55.6, 55.4;  $^{31}\text{P}$  NMR (162 MHz,  $\text{CDCl}_3$ )  $\delta$  8.5; ESI-MS:  $m/z$  449.1  $[\text{M}+\text{H}]^+$ ; HRMS (ESI) calculated for  $[\text{M}+\text{Na}; \text{C}_{20}\text{H}_{18}\text{BrNaO}_5\text{P}]^+$ : 470.9967; found: 470.9967.

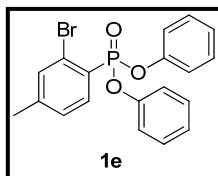

**1e**: Yellow oil. 15% yield.  $^1\text{H}$  NMR (500 MHz,  $\text{CDCl}_3$ )  $\delta$  8.04 (m, 1H), 7.58 (d,  $J = 5.0$  Hz), 7.30 (m, 7H), 7.26 (m, 1H), 7.23 (m, 1H), 7.15 (m, 1H), 2.39 (s, 1H);  $^{13}\text{C}$  NMR (125 MHz,  $\text{CDCl}_3$ )  $\delta$  150.3 (d,  $J = 7.4$  Hz), 145.8 (d,  $J = 2.9$  Hz), 137.2 (d,  $J = 9.7$  Hz), 135.2 (d,  $J = 12.1$  Hz), 129.7, 128.0 (d,  $J = 14.9$  Hz), 125.1 (d,  $J = 0.8$  Hz), 125.1, 124.6 (d,  $J = 198.7$  Hz), 120.6 (d,  $J = 4.7$  Hz), 21.2;  $^{31}\text{P}$  NMR (162 MHz,  $\text{CDCl}_3$ )  $\delta$  8.4; ESI-MS:  $m/z$  403.5  $[\text{M}+\text{H}]^+$ ; HRMS (ESI) calculated for  $[\text{M}+\text{Na}; \text{C}_{19}\text{H}_{16}\text{BrNaO}_3\text{P}]^+$ : 424.9913; found: 424.9913.

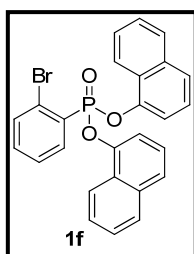

**1f**: Yellow solid. 21% yield.  $^1\text{H}$  NMR (500 MHz,  $\text{CDCl}_3$ )  $\delta$  8.35 (m, 1H), 8.24 (d,  $J = 5.0$  Hz, 2H), 7.84 (d,  $J = 5.0$  Hz, 2H), 7.81 (m, 1H), 7.66 (d,  $J = 10.0$  Hz, 2H), 7.49 (m, 8H), 7.34 (t,  $J = 10$  Hz, 2H);  $^{13}\text{C}$  NMR (125 MHz,  $\text{CDCl}_3$ )  $\delta$  146.61, 146.56, 137.1, 137.0, 135.0, 134.9, 134.8, 134.7, 134.5, 129.4, 127.8, 127.7, 127.6, 127.4, 127.3, 127.2, 126.8, 126.6, 126.5, 126.3, 125.6, 125.51, 125.48, 125.4, 125.2, 125.0, 122.19, 122.16, 121.7, 121.6, 115.5, 115.3 (Due to C-P coupling and the complexity of the spectrum, doublets in the aromatic region cannot be assigned and they are listed as singlets);  $^{31}\text{P}$  NMR (162 MHz,  $\text{CDCl}_3$ )  $\delta$  8.2; ESI-MS:  $m/z$  489.4  $[\text{M}+\text{H}]^+$ ; HRMS (ESI) calculated for  $[\text{M}+\text{Na}; \text{C}_{26}\text{H}_{18}\text{BrNaO}_3\text{P}]^+$ : 511.0069; found: 511.0054.

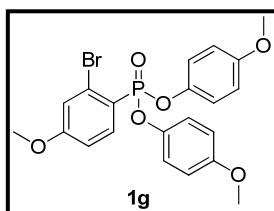

**1g**: Yellow solid. 10% yield.  $^1\text{H}$  NMR (400 MHz,  $\text{CDCl}_3$ )  $\delta$  8.01 (m, 1H), 7.25 (m, 1H), 7.16 (d,  $J = 8.0$  Hz, 4H), 6.87 (m, 1H), 6.78 (d,  $J = 8$  Hz, 4H), 3.86 (s, 3H), 3.76 (s, 6H);  $^{13}\text{C}$  NMR (125 MHz,  $\text{CDCl}_3$ )  $\delta$  163.7 (d,  $J = 3.2$  Hz), 156.7 (d,  $J = 1.2$  Hz), 143.8 (d,  $J = 7.3$  Hz), 138.9 (d,  $J = 10.5$  Hz), 126.2 (d,  $J = 5.2$  Hz), 121.4 (d,  $J = 4.5$  Hz), 120.5 (d,  $J = 12.6$  Hz), 118.8 (d,  $J = 204.3$  Hz), 114.6, 112.5 (d,  $J = 15.3$  Hz), 55.7, 55.5;  $^{31}\text{P}$  NMR (162 MHz,  $\text{CDCl}_3$ )  $\delta$  9.6; ESI-MS:  $m/z$  479.2  $[\text{M}+\text{H}]^+$ ; HRMS (ESI) calculated for  $[\text{M}+\text{Na}; \text{C}_{21}\text{H}_{20}\text{BrNaO}_6\text{P}]^+$ : 501.0073; found: 501.0075.

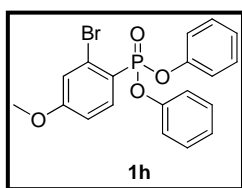

**1h:** Yellow oil. 11% yield.  $^1\text{H}$  NMR (400 MHz,  $\text{CDCl}_3$ )  $\delta$  8.05 (m, 1H), 7.27 (m, 9H), 7.12 (t,  $J = 4.8$  Hz, 1H), 6.89 (m, 1H), 3.83 (s, 3 H);  $^{13}\text{C}$  NMR (125 MHz,  $\text{CDCl}_3$ )  $\delta$  163.8 (d,  $J = 3.3$  Hz), 150.3 (d,  $J = 7.4$  Hz), 138.8 (d,  $J = 10.8$  Hz), 129.7, 126.3 (d,  $J = 5.3$  Hz), 125.1, 120.6 (d,  $J = 4.8$  Hz), 120.5, 118.9 (d,  $J = 205.5$  Hz), 112.6 (d,  $J = 15.5$  Hz), 55.7;  $^{31}\text{P}$  NMR (162 MHz,  $\text{CDCl}_3$ )  $\delta$  8.8; ESI-MS:  $m/z$  419.1  $[\text{M}+\text{H}]^+$ ; HRMS (ESI) calculated for  $[\text{M}+\text{Na}; \text{C}_{19}\text{H}_{16}\text{BrNaO}_4\text{P}]^+$ : 440.9862; found: 440.9863.

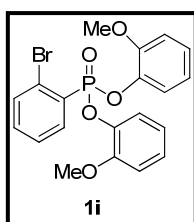

**1i:** White solid. 17% yield.  $^1\text{H}$  NMR (400 MHz,  $\text{CDCl}_3$ )  $\delta$  8.27-8.20 (m, 1H), 7.73 (dd,  $J = 8.2, 6.4$  Hz, 1H), 7.42 (ddd,  $J = 8.1, 4.8, 2.0$  Hz, 2H), 7.31 (dt,  $J = 8.0, 1.4$  Hz, 2H), 7.10 (t,  $J = 7.8$  Hz, 2H), 6.90 (d,  $J = 8.2$  Hz, 2H), 6.87 (td,  $J = 7.9, 1.1$  Hz, 2H), 3.67 (s, 6H);  $^{13}\text{C}$  NMR (125 MHz,  $\text{CDCl}_3$ )  $\delta$  150.8 (d,  $J = 4.6$  Hz), 139.8 (d,  $J = 8.5$  Hz), 136.3 (d,  $J = 8.8$  Hz), 134.3 (d,  $J = 12.1$  Hz), 133.7 (d,  $J = 2.9$  Hz), 129.8 (d,  $J = 203.4$  Hz), 126.6 (d,  $J = 14.7$  Hz), 125.7 (d,  $J = 1.4$  Hz), 125.4 (d,  $J = 4.1$  Hz), 122.1 (d,  $J = 3.5$  Hz), 120.7 (d,  $J = 1.4$  Hz), 112.8, 55.8;  $^{31}\text{P}$  NMR (162 MHz,  $\text{CDCl}_3$ )  $\delta$  8.1; ESI-MS:  $m/z$  471.0  $[\text{M}+\text{Na}]^+$ ; HRMS (ESI) calculated for  $[\text{M}+\text{Na}; \text{C}_{20}\text{H}_{18}\text{BrNaO}_5\text{P}]^+$ : 470.9967; found: 470.9971.

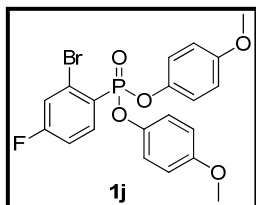

**1j:** Yellow oil. 15% yield.  $^1\text{H}$  NMR (500 MHz,  $\text{CDCl}_3$ )  $\delta$  8.15 (m, 1H), 7.50 (m, 1H), 7.17 (m, 5H), 8.80 (m, 4H), 3.77 (s, 6H);  $\delta$  7.78;  $^{13}\text{C}$  NMR (125 MHz,  $\text{CDCl}_3$ )  $\delta$  165.1 (dd,  $J = 259.5, 3.8$  Hz), 156.9 (d,  $J = 1.2$  Hz), 151.0, 143.6 (d,  $J = 7.6$  Hz), 139.4 (t,  $J = 9.9$  Hz), 126.4 (dd,  $J = 9.9, 5.3$  Hz), 124.0 (dd,  $J = 200.6, 3.4$  Hz), 122.3 (dd,  $J = 24.3, 13.0$  Hz), 121.4 (d,  $J = 4.4$  Hz), 114.7, 55.5, 55.4;  $^{31}\text{P}$  NMR (162 MHz,  $\text{CDCl}_3$ )  $\delta$  7.8; ESI-MS:  $m/z$  467.2  $[\text{M}+\text{H}]^+$ ; HRMS (ESI) calculated for  $[\text{M}+\text{Na}; \text{C}_{20}\text{H}_{17}\text{FBrNaO}_5\text{P}]^+$ : 488.9873; found: 488.9872.

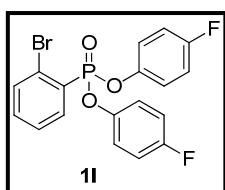

**1l:** Yellow oil. 19% yield.  $^1\text{H}$  NMR (400 MHz,  $\text{CDCl}_3$ )  $\delta$  8.12 (m, 1H), 7.74 (m, 1H), 7.45 (m, 2H), 7.21 (m, 4H), 5.97 (m, 4H);  $^{13}\text{C}$  NMR (125 MHz,  $\text{CDCl}_3$ )  $\delta$  159.8 (d,  $J = 244.2$  Hz), 145.9 (dd,  $J = 7.5, 2.7$  Hz), 137.4 (dd,  $J = 14.5, 9.3$  Hz), 134.8 (dd,  $J = 22.5, 11.2$  Hz), 134.6 (dd,  $J = 22.5, 11.2$  Hz), 127.3 (dd,  $J = 31.0, 14.8$  Hz), 127.2 (d,  $J = 196.2$  Hz), 125.2, 122.0 (d,  $J = 23.4$  Hz), 116.3 (d,  $J = 22.5$  Hz);  $^{31}\text{P}$  NMR (162 MHz,  $\text{CDCl}_3$ )  $\delta$  8.6; ESI-MS:  $m/z$  425.1  $[\text{M}+\text{H}]^+$ ; HRMS (ESI) calculated for  $[\text{M}+\text{Na}; \text{C}_{18}\text{H}_{12}\text{BrNaO}_3\text{P}]^+$ : 446.9568; found: 446.9569.

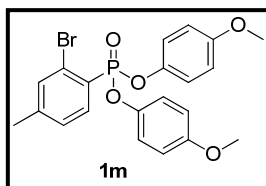

**1m:** Colorless oil. 19% yield.  $^1\text{H}$  NMR (400 MHz,  $\text{CDCl}_3$ )  $\delta$  7.98 (dd,  $J = 16.0, 8.0$  Hz, 1H), 7.56 (d,  $J = 4.0$  Hz, 1H), 7.17 (m, 5H), 6.77 (m, 4H), 3.74 (s, 6H), 2.37 (s, 3H);  $^{13}\text{C}$  NMR (125 MHz,  $\text{CDCl}_3$ )  $\delta$  156.8, 145.7, 143.8 (d,  $J = 7.3$  Hz), 137.3 (d,  $J = 16.2$  Hz), 135.2 (d,  $J = 11.7$  Hz), 127.9 (t,  $J = 13.7$  Hz), 125.1 (d,  $J = 3.7$  Hz), 124.5 (d,  $J = 198.7$  Hz), 121.4 (d,  $J = 11.2$  Hz), 114.6 (d,  $J = 5.0$  Hz), 55.5, 21.2 (d,  $J = 18.4$  Hz);  $^{31}\text{P}$  NMR (162 MHz,  $\text{CDCl}_3$ )  $\delta$  9.2; ESI-MS:  $m/z$  463.5  $[\text{M}+\text{H}]^+$ ; HRMS (ESI) calculated for  $[\text{M}+\text{Na}; \text{C}_{21}\text{H}_{20}\text{BrNaO}_5\text{P}]^+$ : 485.0124; found: 485.0126.



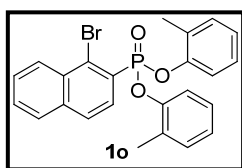

**1o:** Colorless oil. 18% yield.  $^1\text{H}$  NMR (500 MHz,  $\text{CDCl}_3$ )  $\delta$  8.59-8.52 (m, 1H), 8.24 (dd,  $J = 13.0, 8.5$  Hz, 1H), 7.96 (dd,  $J = 8.5, 3.5$  Hz, 1H), 7.92 (dd,  $J = 6.9, 2.5$  Hz, 1H), 7.74-7.66 (m, 2H), 7.27-7.25 (m, 2H), 7.21-7.17 (m, 2H), 7.11-7.03 (m, 4H), 2.31 (s, 6H);  $^{13}\text{C}$  NMR (125 MHz,  $\text{CDCl}_3$ )  $\delta$  149.2 (d,  $J = 7.5$  Hz), 136.3 (d,  $J = 2.5$  Hz), 132.6 (d,  $J = 12.5$  Hz), 131.5 (d,  $J = 16.2$  Hz), 130.3 (d,  $J = 8.8$  Hz), 129.7 (d,  $J = 6.2$  Hz), 129.2 (d,  $J = 23.7$  Hz), 128.6 (d,  $J = 6.2$  Hz), 128.5 (d,  $J = 2.5$  Hz), 128.4 (d,  $J = 7.5$  Hz), 127.9 (d,  $J = 13.7$  Hz), 127.3 (d,  $J = 197.5$  Hz), 127.0, 125.9, 120.3 (d,  $J = 18.7$ ), 16.9;  $^{31}\text{P}$  NMR (162 MHz,  $\text{CDCl}_3$ )  $\delta$  8.2; ESI-MS:  $m/z$  467.3  $[\text{M}+\text{H}]^+$ ; HRMS (ESI) calculated for  $[\text{M}+\text{Na}; \text{C}_{24}\text{H}_{20}\text{BrNaO}_3\text{P}]^+$ : 489.0226; found: 489.0226.

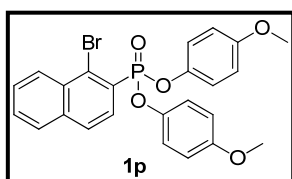

**1p:** Yellow oil. 15% yield.  $^1\text{H}$  NMR (400 MHz,  $\text{CDCl}_3$ )  $\delta$  8.53 (d,  $J = 8.0$  Hz, 1H), 8.13 (td,  $J = 16.0, 8.0$  Hz, 1H), 7.87 (m, 2H), 7.67 (m, 2H), 7.20 (d,  $J = 12.0$  Hz, 5.0 Hz, 4H), 6.78 (m, 4H), 3.73 (s, 6H);  $^{13}\text{C}$  NMR (125 MHz,  $\text{CDCl}_3$ )  $\delta$  156.8, 143.9 (d,  $J = 7.6$  Hz), 136.3, 132.5 (d,  $J = 13.4$  Hz), 130.7 (d,  $J = 7.5$  Hz), 129.1 (d,  $J = 16.2$  Hz), 128.6 (d,  $J = 3.7$  Hz), 128.5 (d,  $J = 2.5$  Hz), 128.3 (d,  $J = 17.5$  Hz), 127.7 (d,  $J = 13.7$  Hz), 126.19 (d,  $J = 195.6$  Hz), 121.5 (d,  $J = 10.0$  Hz), 114.6 (d,  $J = 6.2$  Hz), 55.6;  $^{31}\text{P}$  NMR (162 MHz,  $\text{CDCl}_3$ )  $\delta$  9.2; ESI-MS:  $m/z$  499.3  $[\text{M}+\text{H}]^+$ ; HRMS (ESI) calculated for  $[\text{M}+\text{Na}; \text{C}_{24}\text{H}_{20}\text{BrNaO}_5\text{P}]^+$ : 521.0124; found: 521.0106.

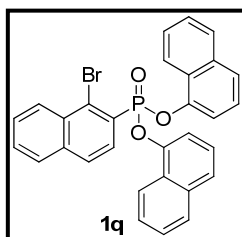

**1q:** White solid. 19% yield.  $^1\text{H}$  NMR (500 MHz,  $\text{CDCl}_3$ )  $\delta$  8.55 (d,  $J = 9.8$  Hz, 1H), 8.35 (dd,  $J = 13.1, 8.5$  Hz, 1H), 8.25 (d,  $J = 8.4$  Hz, 2H), 8.00 (dd,  $J = 8.4, 3.6$  Hz, 1H), 7.95-7.90 (m, 1H), 7.83 (d,  $J = 8.1$  Hz, 2H), 7.74-7.67 (m, 2H), 7.65 (d,  $J = 8.2$  Hz, 2H), 7.55 (dd,  $J = 6.6, 1.1$  Hz, 2H), 7.48 (m, 4H), 7.33 (t,  $J = 8.0$  Hz, 2H);  $^{13}\text{C}$  NMR (125 MHz,  $\text{CDCl}_3$ )  $\delta$  146.7 (d,  $J = 8.0$  Hz), 136.4 (d,  $J = 2.5$  Hz), 135.0, 132.6 (d,  $J = 13.6$  Hz), 130.3 (d,  $J = 9.3$  Hz), 129.4, 129.0 (d,  $J = 3.4$  Hz), 128.7, 128.5, 128.4, 128.2, 128.1, 127.8, 126.7, 126.6 (d,  $J = 6.4$  Hz), 126.4, 125.5 (d,  $J = 1.2$  Hz), 125.1, 122.2, 115.4 (d,  $J = 3.5$  Hz);  $^{31}\text{P}$  NMR (162 MHz,  $\text{CDCl}_3$ )  $\delta$  8.8; ESI-MS:  $m/z$  539.2  $[\text{M}+\text{H}]^+$ ; HRMS (ESI) calculated for  $[\text{M}+\text{Na}; \text{C}_{30}\text{H}_{20}\text{BrNaO}_3\text{P}]^+$ : 561.0226; found: 561.0210.

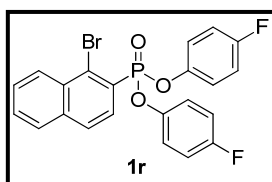

**1r:** Yellow solid. 17% yield.  $^1\text{H}$  NMR (500 MHz,  $\text{CDCl}_3$ )  $\delta$  8.53 (m, 1H), 8.13 (m, 1H), 7.90 (m, 2H), 7.71 (m, 2H), 7.25 (m, 4H), 6.97 (m, 4H);  $^{13}\text{C}$  NMR (125 MHz,  $\text{CDCl}_3$ )  $\delta$  160.8, 158.9, 146.0, 136.6, 136.4, 132.5, 132.4, 130.57, 130.5, 130.4, 130.1, 129.91, 129.85, 129.8, 129.5, 129.3, 128.6, 128.54, 128.47, 128.3, 128.1, 128.0, 127.8, 127.2, 126.2, 125.5, 124.6, 122.0, 116.5, 116.3 (Due to C-P coupling and the complexity of the spectrum, doublets in the aromatic region cannot be assigned and they are listed as singlets);  $^{31}\text{P}$  NMR (126 MHz,  $\text{CDCl}_3$ )  $\delta$  9.3 (d,  $J = 21.4$  Hz); ESI-MS:  $m/z$  475  $[\text{M}+\text{H}]^+$ ; HRMS (ESI) calculated for  $[\text{M}+\text{H}; \text{C}_{22}\text{H}_{15}\text{BrO}_3\text{F}_2\text{P}]^+$ : 474.9905; found: 474.9904.

#### 4. General procedure of intramolecular cyclization for constructing the P-chiral center

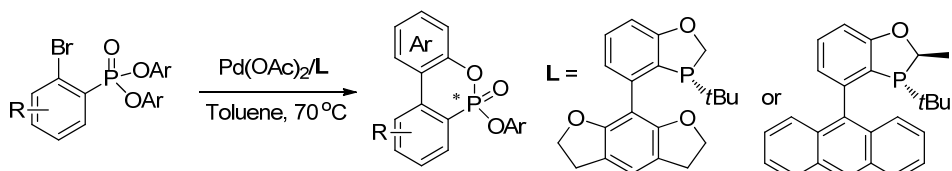

To a mixture of bromide (0.2 mmol), base (0.3 mmol), Pd(OAc)<sub>2</sub> (5 mol%), L (10 mol%) was charged toluene (1 mL). The resulting mixture was stirred at 70 °C under nitrogen for 24 h, and then cooled to room temperature, and concentrated under vacuum. The residue was directly subjected for column chromatography on silica gel to afford the desired product.

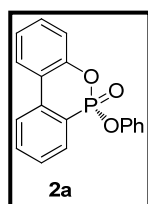

**2a**: Yellow solid; 83% yield. 88% ee; Enantiomeric excess was determined by chiral HPLC: Chiralpak AD-H, 25 °C, flow rate: 1 mL/min, hexanes/isopropanol: 80/20, 254 nm, 15.9 min (*S*), 18.0 min (*R*);  $[\alpha]_D^{27} = -28.4^\circ$  ( $c = 0.20$ , CHCl<sub>3</sub>); The absolute configuration was assigned by analogy with compound **2f**. <sup>1</sup>H NMR (400 MHz, CDCl<sub>3</sub>)  $\delta$  8.08-7.93 (m, 3H), 7.76 (t,  $J = 7.8$  Hz, 1H), 7.53 (td,  $J = 7.3, 3.6$  Hz, 1H), 7.41 (t,  $J = 7.7$  Hz, 1H), 7.35-7.20 (m, 4H), 7.13 (t,  $J = 7.0$  Hz, 1H), 7.05 (d,  $J = 8.4$  Hz, 2H); <sup>13</sup>C NMR (125 MHz, CDCl<sub>3</sub>)  $\delta$  149.9 (d,  $J = 8.7$  Hz), 149.8 (d,  $J = 8.2$  Hz), 137.1 (d,  $J = 7.1$  Hz), 133.9, 130.7, 130.6, 129.7, 128.3 (d,  $J = 15.8$  Hz), 125.3, 125.0, 124.2 (d,  $J = 12.4$  Hz), 122.5, 122.4, 121.5 (d,  $J = 182.0$  Hz), 120.7 (d,  $J = 4.2$  Hz), 120.2 (d,  $J = 6.8$  Hz); <sup>31</sup>P NMR (162 MHz, CDCl<sub>3</sub>)  $\delta$  6.4; ESI-MS:  $m/z$  309.2 [M+H]<sup>+</sup>; HRMS (ESI) calculated for [M+Na; C<sub>18</sub>H<sub>13</sub>NaO<sub>3</sub>P]<sup>+</sup>: 331.0495; found: 331.0496.

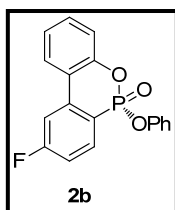

**2b**: White solid. 83% yield. 84% ee; Enantiomeric excess was determined by chiral HPLC: Chiralpak AD-H, 25 °C, flow rate: 1 mL/min, hexanes/isopropanol: 60/40, 254 nm, 8.3 min (*S*), 9.3 min (*R*);  $[\alpha]_D^{27} = -24.1^\circ$  ( $c = 0.40$ , CHCl<sub>3</sub>); The absolute configuration was assigned by analogy with compound **2f**. <sup>1</sup>H NMR (500 MHz, CDCl<sub>3</sub>)  $\delta$  8.03 (ddd,  $J = 14.4, 8.4, 5.9$  Hz, 1H), 7.87 (dd,  $J = 8.0, 1.5$  Hz, 1H), 7.66 (ddd,  $J = 10.4, 5.4, 2.3$  Hz, 1H), 7.43 (ddd,  $J = 8.9, 2.7, 1.4$  Hz, 1H), 7.31 (td,  $J = 7.9, 0.8$  Hz, 1H), 7.28-7.19 (m, 4H), 7.17-7.11 (m, 1H), 7.06-7.01 (m, 2H); <sup>13</sup>C NMR (125 MHz, CDCl<sub>3</sub>)  $\delta$  166.3 (dd,  $J = 254.3, 3.6$  Hz), 150.1 (d,  $J = 8.3$  Hz), 149.7 (d,  $J = 8.5$  Hz), 140.3 (t,  $J = 8.7$  Hz), 133.6 (dd,  $J = 10.5, 9.7$  Hz), 131.4, 129.7 (d,  $J = 1.0$  Hz), 128.6 (d,  $J = 28.6$  Hz), 125.4 (dd,  $J = 3.2, 1.1$  Hz), 125.1, 121.7 (d,  $J = 11.8$  Hz), 120.6 (d,  $J = 4.4$  Hz), 120.4 (d,  $J = 7.1$  Hz), 117.7 (d,  $J = 186.8$  Hz), 116.0 (dd,  $J = 22.1, 16.9$  Hz), 111.3 (dd,  $J = 23.5, 13.6$  Hz); <sup>31</sup>P NMR (162 MHz, CDCl<sub>3</sub>)  $\delta$  5.8; ESI-MS:  $m/z$  327.2 [M+H]<sup>+</sup>; HRMS (ESI) calculated for [M+Na; C<sub>18</sub>H<sub>12</sub>FNaO<sub>3</sub>P]<sup>+</sup>: 349.0400; found: 349.0407.

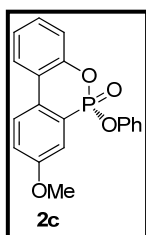

**2c**: White solid. 61% yield. 87% ee; Enantiomeric excess was determined by chiral HPLC: Chiralpak AD-H, 25 °C, flow rate: 1 mL/min, hexanes/isopropanol: 80/20, 254 nm, 18.4 min (*S*), 21.7 min (*R*);  $[\alpha]_D^{27} = -19.3^\circ$  ( $c = 0.40$ , CHCl<sub>3</sub>); The absolute configuration was assigned by analogy with compound **2f**. <sup>1</sup>H NMR (500 MHz, CDCl<sub>3</sub>)  $\delta$  7.90 (dd,  $J = 8.7, 7.9$  Hz, 1H), 7.87 (dd,  $J = 7.9, 1.5$  Hz, 1H), 7.47 (dd,  $J = 16.5, 2.8$  Hz, 1H), 7.35-7.30 (m, 1H), 7.29-7.23 (m, 4H), 7.20 (dd,  $J = 8.0, 1.2$  Hz, 1H), 7.15-7.10 (m, 1H), 7.07-7.02 (m, 2H), 3.87 (s, 3H); <sup>13</sup>C NMR (125 MHz, CDCl<sub>3</sub>)  $\delta$  159.4 (d,

$J = 19.4$  Hz), 149.8 (d,  $J = 8.8$  Hz), 149.3 (d,  $J = 8.3$  Hz), , 129.6 (d,  $J = 1.0$  Hz), 129.5, 128.7, 126.0 (d,  $J = 14.8$  Hz), 125.3 (d,  $J = 1.3$  Hz), 124.9, 124.7, 122.7 (d,  $J = 180.0$  Hz), 122.6 (d,  $J = 12.0$  Hz), 121.5 (d,  $J = 2.9$  Hz), 120.7 (d,  $J = 4.3$  Hz), 120.1 (d,  $J = 7.0$  Hz), 113.5 (d,  $J = 10.7$  Hz), 55.8;  $^{31}\text{P}$  NMR (162 MHz,  $\text{CDCl}_3$ )  $\delta$  6.5; ESI-MS:  $m/z$  339.2  $[\text{M}+\text{H}]^+$ ; HRMS (ESI) calculated for  $[\text{M}+\text{Na}; \text{C}_{19}\text{H}_{15}\text{NaO}_4\text{P}]^+$ : 361.0600; found: 361.0601.

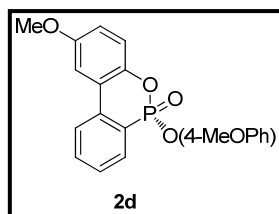

**2d:** Colorless oil. 82% yield. 83% ee; Enantiomeric excess was determined by chiral HPLC: Chiralpak AD-H, 25 °C, flow rate: 1 mL/min, hexanes/isopropanol: 60/40, 254 nm, 12.0 min (*S*), 15.6 min (*R*);  $[\alpha]_{\text{D}}^{27} = -17.4^\circ$  ( $c = 0.58$ ,  $\text{CHCl}_3$ ); The absolute configuration was assigned by analogy with compound **2f**.  $^1\text{H}$  NMR (500 MHz,  $\text{CDCl}_3$ )  $\delta$  7.97 (ddd,  $J = 14.7, 7.6, 1.0$  Hz, 1H), 7.94-7.90 (m, 1H), 7.71 (t,  $J = 7.8$  Hz, 1H), 7.52-7.46 (m, 1H), 7.41 (d,  $J = 3.0$  Hz, 1H), 7.14 (d,  $J = 8.9$  Hz, 1H), 6.96-6.90 (m, 3H), 6.77-6.71 (m, 2H), 3.86 (s, 3H), 3.72 (s, 3H);  $^{13}\text{C}$  NMR (125 MHz,  $\text{CDCl}_3$ )  $\delta$  156.8 (d,  $J = 1.3$  Hz), 156.5, 143.8 (d,  $J = 8.2$  Hz), 143.2 (d,  $J = 8.5$  Hz), 137.0 (d,  $J = 6.9$  Hz), 133.8 (d,  $J = 2.5$  Hz), 130.8 (d,  $J = 9.2$  Hz), 128.4 (d,  $J = 15.7$  Hz), 124.1 (d,  $J = 12.3$  Hz), 123.2 (d,  $J = 11.8$  Hz), 121.8 (d,  $J = 181.2$  Hz), 121.5 (d,  $J = 4.2$  Hz), 121.0 (d,  $J = 6.9$  Hz), 116.0, 114.6 (d,  $J = 1.2$  Hz), 110.0, 55.8, 55.5;  $^{31}\text{P}$  NMR (162 MHz,  $\text{CDCl}_3$ )  $\delta$  7.1; ESI-MS:  $m/z$  369.3  $[\text{M}+\text{H}]^+$ ; HRMS (ESI) calculated for  $[\text{M}+\text{Na}; \text{C}_{20}\text{H}_{17}\text{NaO}_5\text{P}]^+$ : 391.0706; found: 391.07081.

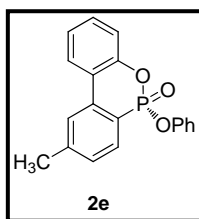

**2e:** White solid. 88% yield. 81% ee; Enantiomeric excess was determined by chiral HPLC: Chiralpak AD-H, 25 °C, flow rate: 1 mL/min, hexanes/isopropanol: 60/40, 254 nm, 8.3 min (*S*), 10.0 min (*R*);  $[\alpha]_{\text{D}}^{27} = -34.5^\circ$  ( $c = 0.3$ ,  $\text{CHCl}_3$ ); The absolute configuration was assigned by analogy with compound **2f**.  $^1\text{H}$  NMR (500 MHz,  $\text{CDCl}_3$ )  $\delta$  7.95 (dd,  $J = 8.0, 1.5$  Hz, 1H), 7.90 (dd,  $J = 14.7, 7.7$  Hz, 1H), 7.81-7.77 (m, 1H), 7.40-7.35 (m, 1H), 7.32 (ddd,  $J = 4.3, 3.7, 1.9$  Hz, 1H), 7.30-7.27 (m, 1H), 7.26-7.20 (m, 3H), 7.11 (td,  $J = 7.6, 1.0$  Hz, 1H), 7.04 (dt,  $J = 8.5, 1.2$  Hz, 2H), 2.50 (s, 3H);  $^{13}\text{C}$  NMR (125 MHz,  $\text{CDCl}_3$ )  $\delta$  150.1 (d,  $J = 8.3$  Hz), 149.9 (d,  $J = 8.5$  Hz), 144.6 (d,  $J = 2.5$  Hz), 137.1 (d,  $J = 7.4$  Hz), 130.7 (d,  $J = 9.8$  Hz), 130.5, 129.6 (d,  $J = 1.0$  Hz), 129.3 (d,  $J = 16.2$  Hz), 128.6 (d,  $J = 29.2$  Hz), 125.2, 124.8, 124.6 (d,  $J = 12.8$  Hz), 122.6 (d,  $J = 12.2$  Hz), 120.7 (d,  $J = 4.4$  Hz), 120.2 (d,  $J = 7.0$  Hz), 118.6 (d,  $J = 184.5$  Hz), 22.2;  $^{31}\text{P}$  NMR (162 MHz,  $\text{CDCl}_3$ )  $\delta$  7.3; ESI-MS:  $m/z$  323.3  $[\text{M}+\text{H}]^+$ ; HRMS (ESI) calculated for  $[\text{M}+\text{Na}; \text{C}_{19}\text{H}_{15}\text{NaO}_3\text{P}]^+$ : 345.0651; found: 345.0654.

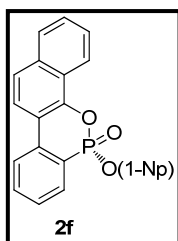

**2f:** White solid. 81% yield. 87% ee; Enantiomeric excess was determined by chiral HPLC: Chiralpak AD-H, 25 °C, flow rate: 1 mL/min, hexanes/isopropanol: 60/40, 254 nm, 10.3 min (*R*), 18.5 min (*S*);  $[\alpha]_{\text{D}}^{27} = -227.2^\circ$  ( $c = 0.61$ ,  $\text{CHCl}_3$ ); The absolute configuration was determined by its X-ray structure. CCDC 1062715 contains the supplementary crystallographic data for this paper. These data can be obtained free of charge via [www.ccdc.cam.ac.uk/conts/retrieving.html](http://www.ccdc.cam.ac.uk/conts/retrieving.html) (or from the Cambridge Crystallographic Data Centre, 12 Union Road, Cambridge CB21EZ, UK; fax: (+44)1223-336-033; or [deposit@ccdc.cam.ac.uk](mailto:deposit@ccdc.cam.ac.uk)).  $^1\text{H}$  NMR (500 MHz,  $\text{CDCl}_3$ )  $\delta$  8.25 (d,  $J = 7.9$  Hz, 1H), 8.14 (dd,  $J = 14.9, 7.5$  Hz, 1H), 8.05 (t,  $J = 7.3$  Hz, 1H), 7.97 (d,  $J = 8.8$  Hz, 1H), 7.85-7.70 (m, 3H), 7.66 (d,  $J = 8.2$  Hz, 1H), 7.59-7.40 (m, 6H), 7.30 (td,  $J = 7.6, 2.9$  Hz, 2H), 7.11 (t,  $J$

= 7.6 Hz, 1H);  $^{13}\text{C}$  NMR (125 MHz,  $\text{CDCl}_3$ )  $\delta$  145.9 (d,  $J = 8.9$  Hz), 145.7 (d,  $J = 9.0$  Hz), 137.7 (d,  $J = 6.9$  Hz), 134.6, 134.5, 134.0 (d,  $J = 2.5$  Hz), 130.9 (d,  $J = 9.5$  Hz), 128.3, 128.1, 127.7, 127.4 (d,  $J = 2.7$  Hz), 127.0, 126.4 (d,  $J = 4.9$  Hz), 126.3, 126.0, 125.8 (d,  $J = 5.9$  Hz), 125.3 (d,  $J = 1.6$  Hz), 125.2 (d,  $J = 2.0$  Hz), 124.8, 124.6 (d,  $J = 12.3$  Hz), 122.2, 121.6 (d,  $J = 181.2$  Hz), 121.5 (d,  $J = 1.3$  Hz), 121.2, 117.5 (d,  $J = 12.3$  Hz), 116.2 (d,  $J = 3.6$  Hz);  $^{31}\text{P}$  NMR (162 MHz,  $\text{CDCl}_3$ )  $\delta$  7.7; ESI-MS:  $m/z$  409.4  $[\text{M}+\text{H}]^+$ ; HRMS (ESI) calculated for  $[\text{M}+\text{Na}; \text{C}_{26}\text{H}_{17}\text{NaO}_3\text{P}]^+$ : 431.0808; found: 431.0811.

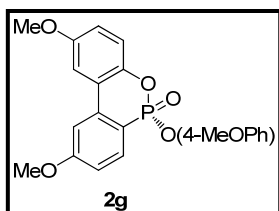

**2g**: Colorless oil. 85% yield. 87% ee; Enantiomeric excess was determined by chiral HPLC: Chiralpak AD-H, 25 °C, flow rate: 1 mL/min, hexanes/isopropanol: 60/40, 254 nm, 15.0 min (*S*), 20.2 min (*R*);  $[\alpha]_{\text{D}}^{27} = -22.9^\circ$  ( $c = 1.14$ ,  $\text{CHCl}_3$ ); The absolute configuration was assigned by analogy with compound **2f**.  $^1\text{H}$  NMR (500 MHz,  $\text{CDCl}_3$ )  $\delta$  7.91 (dd,  $J = 14.3, 8.4$  Hz, 1H), 7.38 (dd,  $J = 5.5, 2.3$  Hz, 1H), 7.36 (d,  $J = 3.0$  Hz, 1H), 7.14 (d,  $J = 8.9$  Hz, 1H), 7.04-6.99 (m, 1H), 6.93 (dd,  $J = 9.1, 1.5$  Hz, 3H), 6.77-6.72 (m, 2H), 3.92 (s, 3H), 3.86 (s, 3H), 3.73 (s, 3H);  $^{13}\text{C}$  NMR (125 MHz,  $\text{CDCl}_3$ )  $\delta$  163.9 (d,  $J = 3.0$  Hz), 156.8 (d,  $J = 1.4$  Hz), 156.3, 144.1 (d,  $J = 8.1$  Hz), 143.4 (d,  $J = 8.5$  Hz), 139.1 (d,  $J = 8.2$  Hz), 132.9 (d,  $J = 10.7$  Hz), 128.6 (d,  $J = 31.3$  Hz), 123.1 (d,  $J = 11.5$  Hz), 121.6 (d,  $J = 4.1$  Hz), 121.0 (d,  $J = 7.1$  Hz), 116.0, 114.5 (d,  $J = 1.2$  Hz), 113.9 (d,  $J = 16.6$  Hz), 110.2, 109.9 (d,  $J = 13.1$  Hz), 55.8, 55.6, 55.5;  $^{31}\text{P}$  NMR (162 MHz,  $\text{CDCl}_3$ )  $\delta$  8.4; ESI-MS:  $m/z$  399.2  $[\text{M}+\text{H}]^+$ ; HRMS (ESI) calculated for  $[\text{M}+\text{Na}; \text{C}_{21}\text{H}_{19}\text{NaO}_6\text{P}]^+$ : 421.0811; found: 421.0814.

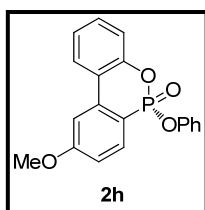

**2h**: Colorless oil. 85% yield. 88% ee; Enantiomeric excess was determined by chiral HPLC: Chiralpak AD-H, 25 °C, flow rate: 1 mL/min, hexanes/isopropanol: 60/40, 254 nm, 9.7 min, 12.4 min;  $[\alpha]_{\text{D}}^{27} = -27.6^\circ$  ( $c = 0.37$ ,  $\text{CHCl}_3$ ); The absolute configuration was assigned by analogy with compound **2f**.  $^1\text{H}$  NMR (500 MHz,  $\text{CDCl}_3$ )  $\delta$  7.94 (dd,  $J = 14.4, 8.5$  Hz, 1H), 7.90 (dd,  $J = 8.0, 1.5$  Hz, 1H), 7.44 (dd,  $J = 5.6, 2.3$  Hz, 1H), 7.41-7.36 (m, 1H), 7.32-7.27 (m, 1H), 7.23 (td,  $J = 8.0, 1.5$  Hz, 3H), 7.11 (td,  $J = 7.7, 1.0$  Hz, 1H), 7.03 (ddd,  $J = 8.3, 3.9, 2.3$  Hz, 3H), 3.93 (s, 3H);  $^{13}\text{C}$  NMR (125 MHz,  $\text{CDCl}_3$ )  $\delta$  164.0 (d,  $J = 3.2$  Hz), 150.2 (d,  $J = 8.1$  Hz), 149.9 (d,  $J = 8.5$  Hz), 139.2 (d,  $J = 8.3$  Hz), 132.8 (d,  $J = 10.7$  Hz), 130.7, 129.6 (d,  $J = 1.1$  Hz), 128.6 (d,  $J = 26.6$  Hz), 125.3, 125.2 (d,  $J = 1.3$  Hz), 124.9, 122.4 (d,  $J = 11.8$  Hz), 120.7 (d,  $J = 4.3$  Hz), 120.3 (d,  $J = 7.1$  Hz), 114.0 (d,  $J = 16.6$  Hz), 109.7 (d,  $J = 13.3$  Hz), 55.6;  $^{31}\text{P}$  NMR (162 MHz,  $\text{CDCl}_3$ )  $\delta$  7.7; ESI-MS:  $m/z$  339.2  $[\text{M}+\text{H}]^+$ ; HRMS (ESI) calculated for  $[\text{M}+\text{Na}; \text{C}_{19}\text{H}_{15}\text{NaO}_4\text{P}]^+$ : 361.0600; found: 361.0603.

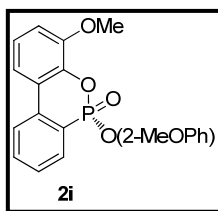

**2i**: Colorless oil. 17% yield. 78% ee; Enantiomeric excess was determined by chiral HPLC: Chiralpak AD-H, 25 °C, flow rate: 1 mL/min, hexanes/isopropanol: 70/30, 254 nm, 10.9 min (*R*), 14.1 min (*S*);  $[\alpha]_{\text{D}}^{27} = -42.9^\circ$  ( $c = 0.1$ ,  $\text{CHCl}_3$ ); The absolute configuration was assigned by analogy with compound **2f**.  $^1\text{H}$  NMR (500 MHz,  $\text{CDCl}_3$ )  $\delta$  8.06 (ddd,  $J = 14.9, 7.6, 1.1$  Hz, 1H), 7.99-7.95 (m, 1H), 7.73 (t,  $J = 7.8$  Hz, 1H), 7.55-7.51 (m, 2H), 7.30-7.27 (m, 1H), 7.21 (t,  $J = 8.1$  Hz, 1H), 7.10-7.04 (m, 1H), 7.00 (d,  $J = 8.1$  Hz, 1H), 6.85 (td,  $J = 7.8, 1.3$  Hz, 1H), 6.79 (d,  $J = 8.2$  Hz, 1H), 3.92 (s, 3H), 3.57 (s, 3H);  $^{13}\text{C}$  NMR (125 MHz,  $\text{CDCl}_3$ )  $\delta$

150.3 (d,  $J = 6.0$  Hz), 137.5, 133.5, 130.9 (d,  $J = 9.3$  Hz), 128.6, 128.1 (d,  $J = 15.9$  Hz), 128.0, 126.0 (d,  $J = 1.6$  Hz), 124.3, 124.2, 123.7 (d,  $J = 12.1$  Hz), 123.0, 122.4 (d,  $J = 3.3$  Hz), 121.5, 120.7, 116.6, 113.1, 112.3, 56.4, 55.5;  $^{31}\text{P}$  NMR (162 MHz,  $\text{CDCl}_3$ )  $\delta$  6.9; ESI-MS:  $m/z$  369.3  $[\text{M}+\text{H}]^+$ ; HRMS (ESI) calculated for  $[\text{M}+\text{H}; \text{C}_{20}\text{H}_{18}\text{O}_5\text{P}]^+$ : 369.0886; found: 369.0889.

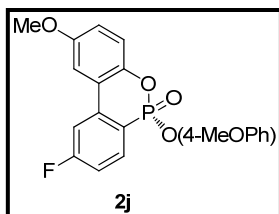

**2j:** Colorless oil. 92% yield. 81% ee; Enantiomeric excess was determined by chiral HPLC: Chiralpak AD-H, 25 °C, flow rate: 1 mL/min, hexanes/isopropanol: 60/40, 254 nm, 12.0 min (*S*), 15.0 min (*R*);  $[\alpha]_{\text{D}}^{27} = -13.3^\circ$  ( $c = 1.12$ ,  $\text{CHCl}_3$ ); The absolute configuration was assigned by analogy with compound **2f**.  $^1\text{H}$  NMR (500 MHz,  $\text{CDCl}_3$ )  $\delta$  7.98 (ddd,  $J = 14.3, 8.4, 5.9$  Hz, 1H), 7.59 (ddd,  $J = 10.4, 5.2, 2.3$  Hz, 1H), 7.32 (d,  $J = 3.0$  Hz, 1H), 7.22-7.17 (m, 1H), 7.16 (d,  $J = 8.9$  Hz, 1H), 6.97 (ddd,  $J = 8.9, 2.9, 1.1$  Hz, 1H), 6.94-6.90 (m, 2H), 6.77-6.72 (m, 2H), 3.87 (s, 3H), 3.73 (s, 3H);  $^{13}\text{C}$  NMR (125 MHz,  $\text{CDCl}_3$ )  $\delta$  166.2 (dd,  $J = 254.1, 3.7$  Hz), 156.9 (d,  $J = 1.4$  Hz), 156.5, 144.0 (d,  $J = 8.1$  Hz), 143.1 (d,  $J = 8.5$  Hz), 140.2 (t,  $J = 8.7$  Hz), 133.7 (t,  $J = 10.0$  Hz), 128.6 (d,  $J = 28.3$  Hz), 122.4 (dd,  $J = 11.5, 2.5$  Hz), 121.5 (d,  $J = 4.1$  Hz), 121.2 (d,  $J = 7.1$  Hz), 116.9, 116.0 (dd,  $J = 22.0, 16.7$  Hz), 114.6 (d,  $J = 1.2$  Hz), 111.4 (dd,  $J = 23.4, 13.5$  Hz), 110.0, 55.8, 55.5;  $^{31}\text{P}$  NMR (162 MHz,  $\text{CDCl}_3$ )  $\delta$  6.5; ESI-MS:  $m/z$  387.2  $[\text{M}+\text{H}]^+$ ; HRMS (ESI) calculated for  $[\text{M}+\text{Na}; \text{C}_{20}\text{H}_{16}\text{FNaO}_5\text{P}]^+$ : 409.0612; found: 409.0615.

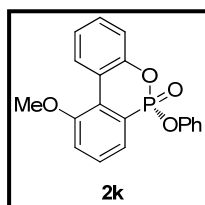

**2k:** Colorless oil. 49% yield. 58% ee; Enantiomeric excess was determined by chiral HPLC: Chiralcel OD-H, 25 °C, flow rate: 1 mL/min, hexanes/isopropanol: 80/20, 254 nm, 19.3 min (*S*), 20.7 min (*R*);  $[\alpha]_{\text{D}}^{27} = -43.9^\circ$  ( $c = 0.12$ ,  $\text{CHCl}_3$ ); The absolute configuration was assigned by analogy with compound **2f**.  $^1\text{H}$  NMR (500 MHz,  $\text{CDCl}_3$ )  $\delta$  8.63 (dd,  $J = 8.1, 1.6$  Hz, 1H), 7.67 (ddd,  $J = 14.7, 7.4, 1.2$  Hz, 1H), 7.51 (ddd,  $J = 8.2, 7.5, 5.0$  Hz, 1H), 7.39-7.34 (m, 1H), 7.32 (dd,  $J = 8.3, 0.9$  Hz, 1H), 7.29-7.21 (m, 4H), 7.13 (dd,  $J = 7.4, 0.7$  Hz, 1H), 7.04-7.00 (m, 2H), 4.00 (s, 3H);  $^{13}\text{C}$  NMR (125 MHz,  $\text{CDCl}_3$ )  $\delta$  156.6 (d,  $J = 17.6$  Hz), 149.8 (d,  $J = 8.5$  Hz), 149.1 (d,  $J = 8.1$  Hz), 130.3 (d,  $J = 1.4$  Hz), 129.8, 129.6 (d,  $J = 1.1$  Hz), 129.5 (d,  $J = 18.7$  Hz), 125.48 (d,  $J = 8.0$  Hz), 125.19 (d,  $J = 1.2$  Hz), 124.3, 124.2 (d,  $J = 181.2$  Hz), 122.9 (d,  $J = 8.6$  Hz), 122.0 (d,  $J = 13.0$  Hz), 120.6 (d,  $J = 4.4$  Hz), 119.9 (d,  $J = 6.4$  Hz), 117.0 (d,  $J = 3.0$  Hz);  $^{31}\text{P}$  NMR (162 MHz,  $\text{CDCl}_3$ )  $\delta$  7.5; ESI-MS:  $m/z$  339.2  $[\text{M}+\text{H}]^+$ ; HRMS (ESI) calculated for  $[\text{M}+\text{Na}; \text{C}_{19}\text{H}_{15}\text{NaO}_4\text{P}]^+$ : 361.0600; found: 361.0606.

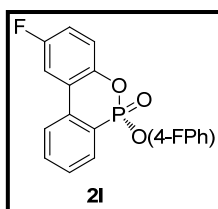

**2l:** Colorless oil. 84% yield. 75% ee; Enantiomeric excess was determined by chiral HPLC: Chiralcel OD-H, 25 °C, flow rate: 1 mL/min, hexanes/isopropanol: 80/20, 254 nm, 8.8 min (*R*), 19.2 min (*S*);  $[\alpha]_{\text{D}}^{27} = -24.0^\circ$  ( $c = 0.42$ ,  $\text{CHCl}_3$ ); The absolute configuration was assigned by analogy with compound **2f**.  $^1\text{H}$  NMR (500 MHz,  $\text{CDCl}_3$ )  $\delta$  8.01 (ddd,  $J = 14.8, 7.6, 1.0$  Hz, 1H), 7.95-7.89 (m, 1H), 7.82-7.75 (m, 1H), 7.64 (dd,  $J = 9.4, 3.0$  Hz, 1H), 7.57 (tdd,  $J = 7.5, 3.7, 0.8$  Hz, 1H), 7.21 (dd,  $J = 9.0, 4.8$  Hz, 1H), 7.15-7.07 (m, 1H), 7.01 (ddd,  $J = 9.1, 4.4, 1.4$  Hz, 2H), 6.98-6.92 (m, 2H);  $^{13}\text{C}$  NMR (125 MHz,  $\text{CDCl}_3$ )  $\delta$  160.7 (d,  $J = 55.0$  Hz), 158.9 (d,  $J = 1.6$  Hz), 158.5, 145.8 (dd,  $J = 8.3, 2.5$  Hz), 145.5 (dd,  $J = 8.5, 2.8$  Hz), 136.1 (dd,  $J =$

7.0, 2.2 Hz), 134.1 (d,  $J = 2.5$  Hz), 130.9 (d,  $J = 9.4$  Hz), 129.1 (d,  $J = 15.7$  Hz), 124.3 (d,  $J = 12.3$  Hz), 123.8 (dd,  $J = 12.0, 8.0$  Hz), 122.0 (dd,  $J = 8.4, 4.3$  Hz), 121.6 (dd,  $J = 8.5, 7.1$  Hz), 117.5 (d,  $J = 23.8$  Hz), 116.3 (dd,  $J = 23.6, 1.2$  Hz), 111.7 (dd,  $J = 25.2, 1.3$  Hz);  $^{31}\text{P}$  NMR (162 MHz,  $\text{CDCl}_3$ )  $\delta$  6.6; ESI-MS:  $m/z$  345.2  $[\text{M}+\text{H}]^+$ ; HRMS (ESI) calculated for  $[\text{M}+\text{Na}; \text{C}_{18}\text{H}_{11}\text{F}_2\text{NaO}_3\text{P}]^+$ : 367.0306; found: 367.0312.

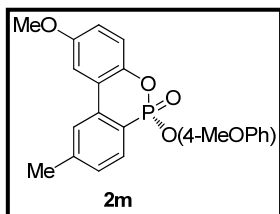

**2m**: Colorless oil. 92% yield. 74% ee; Enantiomeric excess was determined by chiral HPLC: Chiralpak AD-H, 25 °C, flow rate: 1 mL/min, hexanes/isopropanol: 60/40, 254 nm, 11.5 min (*S*), 15.5 min (*R*);  $[\alpha]_{\text{D}}^{27} = -24.0^\circ$  ( $c = 0.84$ ,  $\text{CHCl}_3$ ); The absolute configuration was assigned by analogy with compound **2f**.  $^1\text{H}$  NMR (500 MHz,  $\text{CDCl}_3$ )  $\delta$  7.86 (dd,  $J = 14.5, 7.7$  Hz, 1H), 7.72 (d,  $J = 6.0$  Hz, 1H), 7.41 (d,  $J = 3.0$  Hz, 1H), 7.31 (dd,  $J = 7.8, 2.1$  Hz, 1H), 7.13 (d,  $J = 8.9$  Hz, 1H), 6.95-6.88 (m, 3H), 6.77-6.69 (m, 2H), 3.87 (s, 3H), 3.73 (s, 3H), 2.50 (s, 3H);  $^{13}\text{C}$  NMR (125 MHz,  $\text{CDCl}_3$ )  $\delta$  156.8 (d,  $J = 1.3$  Hz), 156.4, 144.4 (d,  $J = 2.7$  Hz), 144.0 (d,  $J = 8.2$  Hz), 143.3 (d,  $J = 8.5$  Hz), 137.0 (d,  $J = 7.4$  Hz), 130.8 (d,  $J = 9.7$  Hz), 129.3 (d,  $J = 16.1$  Hz), 128.6 (d,  $J = 30.3$  Hz), 124.6 (d,  $J = 12.7$  Hz), 123.2 (d,  $J = 11.8$  Hz), 121.6 (d,  $J = 4.1$  Hz), 121.0 (d,  $J = 6.9$  Hz), 115.9, 114.5 (d,  $J = 1.2$  Hz), 110.0, 55.8, 55.5, 22.1;  $^{31}\text{P}$  NMR (162 MHz,  $\text{CDCl}_3$ )  $\delta$  7.9; ESI-MS:  $m/z$  383.3  $[\text{M}+\text{H}]^+$ ; HRMS (ESI) calculated for  $[\text{M}+\text{Na}; \text{C}_{21}\text{H}_{19}\text{NaO}_5\text{P}]^+$ : 405.0862; found: 405.0867.

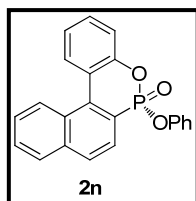

**2n**: Yellow solid. 87% yield. 88% ee; Enantiomeric excess was determined by chiral HPLC: Chiralpak AD-H, 25 °C, flow rate: 1 mL/min, hexanes/isopropanol: 80/20, 254 nm, 13.2 min (*S*), 15.1 min (*R*);  $[\alpha]_{\text{D}}^{27} = -267.1^\circ$  ( $c = 0.6$ ,  $\text{CHCl}_3$ ); The absolute configuration was assigned by analogy with compound **2f**.  $^1\text{H}$  NMR (500 MHz,  $\text{CDCl}_3$ )  $\delta$  8.57 (d,  $J = 8.1$  Hz, 1H), 8.10 (dd,  $J = 7.8, 1.5$  Hz, 1H), 8.01-7.92 (m, 3H), 7.69-7.59 (m, 2H), 7.48-7.42 (m, 1H), 7.36 (dd,  $J = 15.1, 7.9$  Hz, 2H), 7.28-7.21 (m, 2H), 7.15-7.10 (m, 1H), 7.05-7.00 (m, 2H);  $^{13}\text{C}$  NMR (125 MHz,  $\text{CDCl}_3$ )  $\delta$  149.8 (d,  $J = 8.7$  Hz), 149.4 (d,  $J = 8.6$  Hz), 136.8 (d,  $J = 2.5$  Hz), 136.6 (d,  $J = 6.9$  Hz), 130.8 (d,  $J = 1.7$  Hz), 130.1, 129.6, 129.1, 129.0, 128.3, 127.6 (d,  $J = 1.6$  Hz), 126.5 (d,  $J = 1.3$  Hz), 125.3 (d,  $J = 1.3$  Hz), 124.7 (d,  $J = 9.8$  Hz), 124.4 (d,  $J = 1.0$  Hz), 123.6 (d,  $J = 13.9$  Hz), 122.1, 120.7, 120.6, 120.5 (d,  $J = 6.0$  Hz);  $^{31}\text{P}$  NMR (162 MHz,  $\text{CDCl}_3$ )  $\delta$  9.1; ESI-MS:  $m/z$  359.3  $[\text{M}+\text{H}]^+$ ; HRMS (ESI) calculated for  $[\text{M}+\text{Na}; \text{C}_{22}\text{H}_{15}\text{NaO}_3\text{P}]^+$ : 381.0651; found: 381.0656.

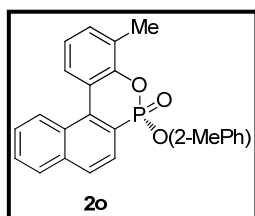

**2o**: Yellow oil. 88% yield. 87% ee; Enantiomeric excess was determined by chiral HPLC: Chiralpak AD-H, 25 °C, flow rate: 1 mL/min, hexanes/isopropanol: 95/5, 254 nm, 35.9 min (*R*), 38.2 min (*S*);  $[\alpha]_{\text{D}}^{27} = -343.5^\circ$  ( $c = 0.6$ ,  $\text{CHCl}_3$ ); The absolute configuration was assigned by analogy with compound **2f**.  $^1\text{H}$  NMR (500 MHz,  $\text{CDCl}_3$ )  $\delta$  8.57 (d,  $J = 8.3$  Hz, 1H), 8.03-7.93 (m, 3H), 7.91 (dd,  $J = 7.3, 1.8$  Hz, 1H), 7.69-7.58 (m, 2H), 7.47 (d,  $J = 8.1$  Hz, 1H), 7.30-7.22 (m, 2H), 7.19-7.11 (m, 1H), 7.03 (t,  $J = 6.3$  Hz, 2H), 2.21 (s, 3H), 1.63 (s, 3H);  $^{13}\text{C}$  NMR (125 MHz,  $\text{CDCl}_3$ )  $\delta$  148.7 (d,  $J = 8.7$  Hz), 147.8 (d,  $J = 8.8$  Hz), 137.0 (d,  $J = 6.9$  Hz), 136.8 (d,  $J = 2.5$  Hz), 131.6, 131.2, 129.9 (d,  $J = 5.6$  Hz), 129.3 (d,  $J = 6.1$  Hz), 129.1 (d,  $J = 13.9$  Hz), 129.0, 128.9 (d,  $J = 16.2$  Hz), 128.6 (d,  $J = 1.6$  Hz), 128.2, 127.4, 127.0, 126.7, 125.0, 124.8 (d,  $J = 9.9$  Hz), 123.8, 123.5 (d,  $J = 13.6$  Hz), 121.6 (d,  $J = 187.6$  Hz), 120.1 (d,

$J = 2.9$  Hz);  $^{31}\text{P}$  NMR (162 MHz,  $\text{CDCl}_3$ )  $\delta$  9.2; ESI-MS:  $m/z$  387.3  $[\text{M}+\text{H}]^+$ ; HRMS (ESI) calculated for  $[\text{M}+\text{Na}; \text{C}_{24}\text{H}_{19}\text{NaO}_3\text{P}]^+$ : 409.0964; found: 409.0969.

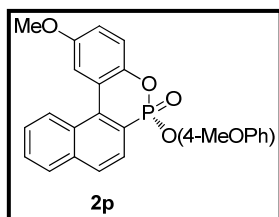

**2p:** Yellow solid. 62% yield. 75% ee; Enantiomeric excess was determined by chiral HPLC: Chiralpak AD-H, 25 °C, flow rate: 1 mL/min, hexanes/isopropanol: 70/30, 254 nm, 15.5 min (*S*), 19.1 min (*R*);  $[\alpha]_{\text{D}}^{27} = -201.3^\circ$  ( $c = 0.22$ ,  $\text{CHCl}_3$ ); The absolute configuration was assigned by analogy with compound **2f**.  $^1\text{H}$  NMR (500 MHz,  $\text{CDCl}_3$ )  $\delta$  8.67-8.60 (m, 1H), 8.02-7.89 (m, 3H), 7.65 (ddd,  $J = 10.0, 6.8, 2.1$  Hz, 3H), 7.28 (d,  $J = 8.9$  Hz, 1H), 6.99 (dd,  $J = 8.9, 2.3$  Hz, 1H), 6.94 (dd,  $J = 9.0, 1.3$  Hz, 2H), 6.79-6.71 (m, 2H), 3.89 (s, 3H), 3.75 (s, 3H);  $^{13}\text{C}$  NMR (125 MHz,  $\text{CDCl}_3$ )  $\delta$  156.8 (d,  $J = 1.4$  Hz), 155.9 (d,  $J = 0.9$  Hz), 143.3 (d,  $J = 8.7$  Hz), 143.1 (d,  $J = 8.6$  Hz), 136.8 (d,  $J = 2.5$  Hz), 136.5 (d,  $J = 6.8$  Hz), 129.2, 129.0, 128.9, 128.2, 127.6 (d,  $J = 1.4$  Hz), 126.3, 124.8 (d,  $J = 9.6$  Hz), 124.2 (d,  $J = 13.7$  Hz), 122.5, 121.5 (d,  $J = 4.2$  Hz), 121.2 (d,  $J = 5.9$  Hz), 116.3 (d,  $J = 1.7$  Hz), 115.1, 114.6 (d,  $J = 1.0$  Hz), 55.9, 55.6;  $^{31}\text{P}$  NMR (162 MHz,  $\text{CDCl}_3$ )  $\delta$  9.7; ESI-MS:  $m/z$  419.3  $[\text{M}+\text{H}]^+$ ; HRMS (ESI) calculated for  $[\text{M}+\text{Na}; \text{C}_{24}\text{H}_{19}\text{NaO}_3\text{P}]^+$ : 441.0862; found: 441.0866.

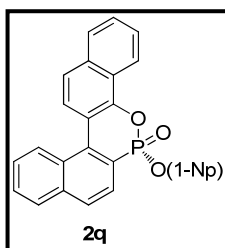

**2q:** White solid. 68% yield. 87% ee; Enantiomeric excess was determined by chiral HPLC: Chiralcel OD-H, 25 °C, flow rate: 1 mL/min, hexanes/isopropanol: 70/30, 254 nm, 8.1 min (*R*), 16.8 min (*S*);  $[\alpha]_{\text{D}}^{27} = -364.5^\circ$  ( $c = 0.42$ ,  $\text{CHCl}_3$ ); The absolute configuration was assigned by analogy with compound **2f**.  $^1\text{H}$  NMR (500 MHz,  $\text{CDCl}_3$ )  $\delta$  8.66-8.56 (m, 1H), 8.24 (d,  $J = 8.3$  Hz, 1H), 8.13 (d,  $J = 8.7$  Hz, 1H), 8.08 (dd,  $J = 12.9, 8.3$  Hz, 1H), 7.98 (dd,  $J = 8.3, 3.6$  Hz, 2H), 7.83 (d,  $J = 8.1$  Hz, 1H), 7.79 (d,  $J = 8.8$  Hz, 1H), 7.71-7.63 (m, 2H), 7.60 (d,  $J = 8.2$  Hz, 1H), 7.55-7.49 (m, 3H), 7.45 (ddd,  $J = 8.1, 6.9, 1.1$  Hz, 1H), 7.30 (t,  $J = 7.9$  Hz, 1H), 7.26-7.21 (m, 1H), 7.13 (d,  $J = 8.4$  Hz, 1H), 6.98 (ddd,  $J = 8.2, 6.9, 1.0$  Hz, 1H);  $^{13}\text{C}$  NMR (125 MHz,  $\text{CDCl}_3$ )  $\delta$  145.6 (d,  $J = 8.8$  Hz), 137.4 (d,  $J = 6.7$  Hz), 137.0 (d,  $J = 2.5$  Hz), 134.5, 134.1, 129.1, 129.0, 128.3, 127.8, 127.5 (d,  $J = 1.4$  Hz), 127.3 (d,  $J = 2.2$  Hz), 127.0, 126.8 (d,  $J = 0.9$  Hz), 126.7 (d,  $J = 1.8$  Hz), 126.24, 126.18, 126.1 (d,  $J = 4.9$  Hz), 125.8, 125.15, 125.13, 124.9 (d,  $J = 10.1$  Hz), 123.7 (d,  $J = 0.7$  Hz), 122.2, 122.1, 120.9, 120.6, 119.0 (d,  $J = 14.4$  Hz), 116.0 (d,  $J = 3.5$  Hz);  $^{31}\text{P}$  NMR (162 MHz,  $\text{CDCl}_3$ )  $\delta$  10.1; ESI-MS:  $m/z$  459.4  $[\text{M}+\text{H}]^+$ ; HRMS (ESI) calculated for  $[\text{M}+\text{H}; \text{C}_{30}\text{H}_{20}\text{O}_3\text{P}]^+$ : 459.1145; found: 459.1142.

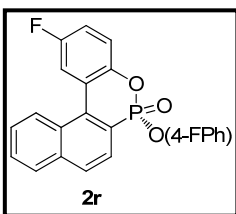

**2r:** White solid. 64% yield. 87% ee; Enantiomeric excess was determined by chiral HPLC: Chiralcel OD-H, 25 °C, flow rate: 1 mL/min, hexanes/isopropanol: 80/20, 254 nm, 9.7 min (*S*), 12.5 min (*R*);  $[\alpha]_{\text{D}}^{27} = -232.2^\circ$  ( $c = 0.42$ ,  $\text{CHCl}_3$ ); The absolute configuration was assigned by analogy with compound **2f**.  $^1\text{H}$  NMR (500 MHz,  $\text{CDCl}_3$ )  $\delta$  8.61-8.51 (m, 1H), 8.06-7.91 (m, 3H), 7.85 (dd,  $J = 9.6, 3.0$  Hz, 1H), 7.75-7.66 (m, 2H), 7.33 (dd,  $J = 8.9, 4.9$  Hz, 1H), 7.22-7.14 (m, 1H), 7.00 (ddt,  $J = 17.1, 14.6, 5.0$  Hz, 3H);  $^{13}\text{C}$  NMR (125 MHz,  $\text{CDCl}_3$ )  $\delta$  160.3 (d,  $J = 133.1$  Hz), 158.4 (d,  $J = 130.9$  Hz), 145.6 (dd,  $J = 8.5, 2.7$  Hz), 145.2 (dd,  $J = 8.8, 2.6$  Hz), 136.8 (d,  $J = 2.4$  Hz), 135.5 (dd,  $J = 6.8, 1.8$  Hz), 129.8 (d,  $J = 16.1$  Hz), 129.3, 128.8 (d,  $J = 13.6$  Hz), 128.6, 128.1, 125.9, 124.8 (dd,  $J = 13.8, 8.3$  Hz), 124.6 (d,  $J = 9.6$  Hz), 122.0 (dd,  $J = 8.5, 4.4$  Hz), 121.8 (dd,  $J = 8.6, 6.0$  Hz), 121.3 (d,  $J = 175.0$  Hz), 117.2 (dd,  $J = 25.7, 1.8$

Hz), 116.8 (d,  $J = 23.6$  Hz), 116.3 (d,  $J = 23.5$  Hz);  $^{31}\text{P}$  NMR (162 MHz,  $\text{CDCl}_3$ )  $\delta$  9.3; ESI-MS:  $m/z$  395.3  $[\text{M}+\text{H}]^+$ ; HRMS (ESI) calculated for  $[\text{M}+\text{Na}; \text{C}_{22}\text{H}_{13}\text{F}_2\text{NaO}_3\text{P}]^+$ : 417.0463; found: 417.0469.

## 5. Experimental procedure for the reactions in Scheme 1

### Synthesis of compound 3

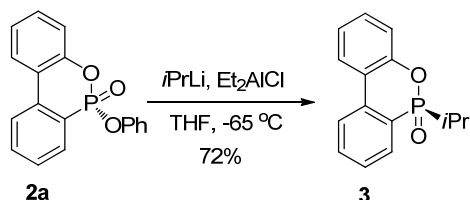

$\text{Et}_2\text{AlCl}$  (1.0 M in Hexane, 1.95 mL, 1.95 mmol) was added to a solution of compound **2a** (600 mg, 1.95 mmol) in THF (12 mL) at room temperature, the resulting mixture was cooled to  $-65\text{ }^\circ\text{C}$  and stirred at the same temperature for 20 min, then  $i\text{PrLi}$  (1.0 M in Hexane, 3.9 mL, 3.9 mmol) was dropped into the above solution and the resulting mixture was stirred for further 10 min. After quenched with saturated  $\text{NH}_4\text{Cl}$  aqueous solution, the mixture was extracted with ethyl acetate, dried over  $\text{Na}_2\text{SO}_4$ , and concentrated under vacuum. The residue was purified by silica gel column chromatography (eluent: PE/EA, 1/1) to give the desired product **3** (362 mg, 72%) as yellow oil. **3**: Enantiomeric excess was determined by chiral HPLC: Chiralpak AD-H,  $25\text{ }^\circ\text{C}$ , flow rate: 1 mL/min, hexanes/isopropanol: 80/20, 254 nm, 7.8 min, 9.5 min;  $[\alpha]_{\text{D}}^{24} = 19.3^\circ$  ( $c = 0.15$ ,  $\text{CHCl}_3$ );  $^1\text{H}$  NMR (500 MHz,  $\text{CDCl}_3$ )  $\delta$  7.97 (dd,  $J = 8.1, 4.6$  Hz, 1H), 7.93-7.85 (m, 2H), 7.72-7.66 (m, 1H), 7.51 (tdd,  $J = 7.5, 2.9, 0.9$  Hz, 1H), 7.40-7.33 (m, 1H), 7.24 (dd,  $J = 12.0, 4.5$  Hz, 2H), 2.28-2.11 (m, 1H), 1.19 (ddd,  $J = 17.9, 16.4, 7.2$  Hz, 6H);  $^{13}\text{C}$  NMR (125 MHz,  $\text{CDCl}_3$ )  $\delta$  149.7 (d,  $J = 8.7$  Hz), 136.0 (d,  $J = 6.2$  Hz), 133.1 (d,  $J = 2.5$  Hz), 130.8 (d,  $J = 8.7$  Hz), 130.5, 128.2 (d,  $J = 12.5$  Hz), 125.1, 124.3, 123.7 (d,  $J = 8.7$  Hz), 123.5 (d,  $J = 112.0$  Hz), 122.2 (d,  $J = 10.0$  Hz), 120.2 (d,  $J = 6.2$  Hz), 28.0 (d,  $J = 97.5$  Hz), 15.2 (d,  $J = 3.7$  Hz), 14.7 (d,  $J = 2.5$  Hz);  $^{31}\text{P}$  NMR (162 MHz,  $\text{CDCl}_3$ )  $\delta$  42.8; ESI-MS:  $m/z$  259.1  $[\text{M}+\text{H}]^+$ ; HRMS (ESI) calculated for  $[\text{M}+\text{Na}; \text{C}_{19}\text{H}_{15}\text{NaO}_4\text{P}]^+$ : 258.0810; found: 259.0881.

### Synthesis of compound 4

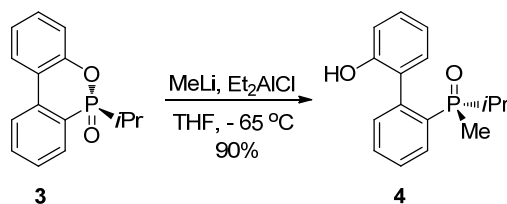

$\text{Et}_2\text{AlCl}$  (1.0 M in Hexane, 0.19 mL, 0.19 mmol) was added to a solution of compound **3** (50 mg, 0.19 mmol) in THF (2 mL) at room temperature, the resulting mixture was cooled to  $-65\text{ }^\circ\text{C}$  and stirred at the same temperature for 20 min, then  $\text{MeLi}$  (1.6 M in ether, 0.24 mL, 0.39 mmol) was dropped into the above solution and the resulting mixture was stirred for further 10 min. After quenched with saturated  $\text{NH}_4\text{Cl}$  aqueous solution, the mixture was extracted with ethyl acetate, dried over  $\text{Na}_2\text{SO}_4$ , and concentrated under vacuum. The residue was purified by silica gel column chromatography (eluent: PE/EA, 1/1) to give the desired product **4** (46 mg, 90%) as white solid. Compound **4** is a mixture of two atropisomers (2.2/1) at room temperature, however, the two



isomers could conversion to each other quickly at 100 °C and the  $^1\text{H}$  NMR shows one compound at this temperature. Enantiomeric excess was determined by chiral HPLC: Chiralcel OD-H, 25 °C, flow rate: 1 mL/min, hexanes/isopropanol: 90/10, 230 nm, 7.6min, 9.3 min;  $[\alpha]_{\text{D}}^{24} = 76.1^\circ$  ( $c = 0.125$ ,  $\text{CHCl}_3$ ); The  $^1\text{H}$  NMR spectrum of **4** showed Mixtures at rt. However, the signals at 100 °C showed one isomer:  $^1\text{H}$  NMR (500 MHz,  $d_6$ -DMSO at 100 °C)  $\delta$  9.1 (br, 1H), 8.03-7.93 (m, 1H), 7.50 (dt,  $J = 16.4, 8.5$  Hz, 2H), 7.22 (t,  $J = 7.8$  Hz, 1H), 7.19-7.13 (m, 1H), 7.02 (d,  $J = 7.3$  Hz, 1H), 6.91 (d,  $J = 8.3$  Hz, 1H), 6.85 (t,  $J = 7.5$  Hz, 1H), 1.68 (m, 1H), 1.25 (br, 3H), 0.90 (dd,  $J = 15.8, 7.0$  Hz, 3H), 0.86 (dd,  $J = 15.8, 7.0$  Hz, 3H);  $^{13}\text{C}$  NMR (125 MHz,  $\text{CDCl}_3$  at rt)  $\delta$  154.3, 142.7, 142.6, 133.2, 133.1, 132.89, 132.87, 132.75, 132.68, 132.20, 132.18, 131.92, 131.90, 131.2, 131.1, 130.8, 130.5, 130.3, 130.3, 130.1, 130.0, 129.8, 127.7, 127.6, 127.44, 127.36, 122.1, 121.3, 120.8, 119.8, 27.0 (d,  $J = 72.5$  Hz) (minor), 26.9 (d,  $J = 70.0$  Hz) (major), 15.5 (d,  $J = 102.5$  Hz) (minor), 15.4 (d,  $J = 153.7$  Hz) (major), 12.0 (d,  $J = 67.5$  Hz) (minor), 8.69 (d,  $J = 70.0$  Hz) (major) (Due to C-P coupling and rotamers at rt, doublets in the aromatic region cannot be assigned and they are listed as singlets);  $^{31}\text{P}$  NMR (162 MHz,  $\text{CDCl}_3$  at rt)  $\delta$  53.2 (major), 47.2 (minor); ESI-MS:  $m/z$  275.2  $[\text{M}+\text{H}]^+$ ; HRMS (ESI) calculated for  $[\text{M}+\text{Na}; \text{C}_{16}\text{H}_{20}\text{O}_2\text{P}]^+$ : 275.1201; found: 275.1197.

### Synthesis of compound 5

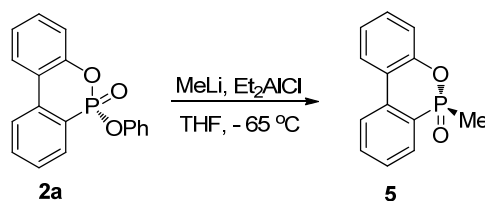

$\text{Et}_2\text{AlCl}$  (1.0 M in Hexane, 0.4 mL, 0.40 mmol) was added to a solution of compound **2a** (125 mg, 0.40 mmol) in THF (2 mL) at room temperature, the resulting mixture was cooled to  $-65^\circ\text{C}$  and stirred at the same temperature for 20 min, then MeLi (1.6 M in ether, 0.38 mL, 0.6 mmol) was dropped into the above solution and the resulting mixture was stirred for further 10 min. After quenched with saturated  $\text{NH}_4\text{Cl}$  aqueous solution, the mixture was extracted with ethyl acetate, dried over  $\text{Na}_2\text{SO}_4$ , and concentrated under vacuum. The residue was purified by silica gel column chromatography (eluent: PE/EA, 1/1) to give the desired product **5** (27 mg, 30%) as yellow oil. **5**: Enantiomeric excess was determined by chiral HPLC: Chiralpak AD-H, 25 °C, flow rate: 1 mL/min, hexanes/isopropanol: 70/20, 230 nm, 7.0 min, 8.6 min;  $[\alpha]_{\text{D}}^{24} = 5.8^\circ$  ( $c = 0.125$ ,  $\text{CHCl}_3$ );  $^1\text{H}$  NMR (400 MHz,  $\text{CDCl}_3$ )  $\delta$  7.98-7.80 (m, 3H), 7.68 (t,  $J = 7.7$  Hz, 1H), 7.50 (td,  $J = 7.3, 2.6$  Hz, 1H), 7.37 (t,  $J = 7.7$  Hz, 1H), 7.26-7.21 (m, 2H), 1.82 (d,  $J = 14.6$  Hz, 3H);  $^{13}\text{C}$  NMR (125 MHz,  $\text{CDCl}_3$ )  $\delta$  149.0 (d,  $J = 8.1$  Hz), 135.2 (d,  $J = 5.9$  Hz), 133.1, 130.5, 129.5 (d,  $J = 11.5$  Hz), 128.4 (d,  $J = 13.5$  Hz), 126.4, 125.1, 124.6, 123.9 (d,  $J = 9.5$  Hz), 122.4 (d,  $J = 11.4$  Hz), 120.5 (d,  $J = 6.0$  Hz), 14.8 (d,  $J = 100.4$  Hz);  $^{31}\text{P}$  NMR (162 MHz,  $\text{CDCl}_3$ )  $\delta$  35.3; ESI-MS:  $m/z$  231.1  $[\text{M}+\text{H}]^+$ ; HRMS (ESI) calculated for  $[\text{M}+\text{H}; \text{C}_{13}\text{H}_{11}\text{O}_2\text{P}]^+$ : 230.0497; found: 231.0566.

### Synthesis of compound ent-4

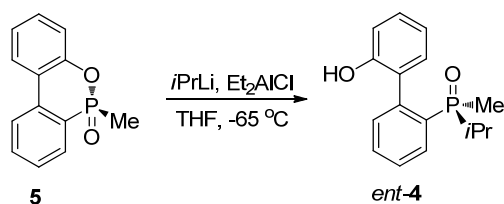

Et<sub>2</sub>AlCl (1.0 M in Hexane, 22 μL, 0.022 mmol) was added to a solution of compound **5** (5 mg, 0.022 mmol) in THF (2 mL) at room temperature, the resulting mixture was cooled to -65 °C and stirred at the same temperature for 20 min, then *i*PrLi (1.0 M in Hexane, 44 μL, 0.044 mmol) was dropped into the above solution and the resulting mixture was stirred for further 10 min. After quenched with saturated NH<sub>4</sub>Cl aqueous solution, the mixture was extracted with ethyl acetate, dried over Na<sub>2</sub>SO<sub>4</sub>, and concentrated under vacuum. The residue was purified by silica gel column chromatography (eluent: PE/EA, 1/1) to give the desired product *ent*-**4** (2.1 mg, 35%) as white solid. Enantiomeric excess was determined by chiral HPLC: Chiralcel OD-H, 25 °C, flow rate: 1 mL/min, hexanes/isopropanol: 90/10, 230 nm, 7.6 min, 9.3 min. Compound *ent*-**4** is a mixture of two atropisomers (2.2/1) at room temperature.

## 6. References

- (1) W. Tang, A. G. Capacci, X. Wei, W. Li, A. White, N. D. Patel, J. Savoie, J. Gao, S. Rodriguez,; B. Qu, N. Haddad, B. Z. Lu, D. Krishnamurthy, N. K. Yee and C. H. Senanayake, *Angew. Chem., Int. Ed.* 2010, **49**, 5879.
- (2) W. Tang, N. D. Patel, G. Xu, X. Xu, J. Savoie, S. Ma, M.-H. Hao, S. Keshipeddy, A. G. Capacci, X. Wei, Y. Zhang, J. Gao, W. Li, S. Rodriguez, B. Z. Lu, N. K. Yee and C. H. Senanayake, *Org. Lett.* 2012, **14**, 2258.
- (3) W. Tang, S. Keshipeddy, Y. Zhang,; X. Wei, J. Savoie, N. D. Patel, N. K. Yee and C. H. Senanayake, *Org. Lett.* 2011, **13**, 1366.
- (4) G. Xu, W. Fu, G. Liu, C. H. Senanayake and W. Tang, *J. Am. Chem. Soc.* 2014, **136**, 570.
- (5) J. C. González-Gómez, L. Santana and E. Uriarte, *Tetrahedron* 2005, **61**, 4805.
- (6) T. J. Reddy, T. Iwama, H. J. Halpern and V. H. Rawal, *J. Org. Chem.* 2002, **67**, 4635

## 7. X-ray of 2f

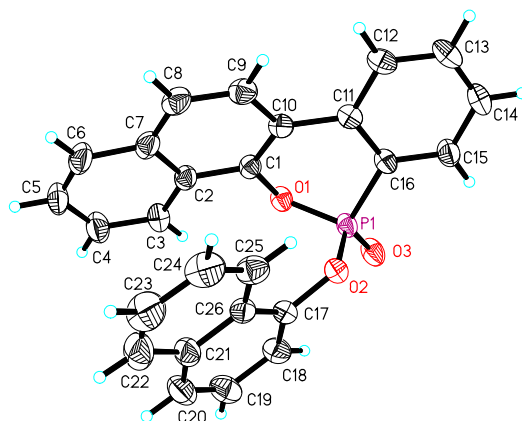

Table 1. Crystal data and structure refinement for 289.

|                                   |                                                                                                                |
|-----------------------------------|----------------------------------------------------------------------------------------------------------------|
| Identification code               | 289                                                                                                            |
| Empirical formula                 | C <sub>26</sub> H <sub>17</sub> O <sub>3</sub> P                                                               |
| Formula weight                    | 408.37                                                                                                         |
| Temperature                       | 296(2) K                                                                                                       |
| Wavelength                        | 1.54178 Å                                                                                                      |
| Crystal system, space group       | Orthorhombic, P 21 21 21                                                                                       |
| Unit cell dimensions              | a = 8.4926(17) Å    alpha = 90 deg.<br>b = 12.013(2) Å    beta = 90 deg.<br>c = 19.248(4) Å    gamma = 90 deg. |
| Volume                            | 1963.7(7) Å <sup>3</sup>                                                                                       |
| Z, Calculated density             | 4, 1.381 Mg/m <sup>3</sup>                                                                                     |
| Absorption coefficient            | 1.455 mm <sup>-1</sup>                                                                                         |
| F(000)                            | 848                                                                                                            |
| Crystal size                      | 0.34 x 0.28 x 0.22 mm                                                                                          |
| Theta range for data collection   | 4.34 to 67.01 deg.                                                                                             |
| Limiting indices                  | -10 ≤ h ≤ 10, -14 ≤ k ≤ 14, -22 ≤ l ≤ 22                                                                       |
| Reflections collected / unique    | 8910 / 3380 [R(int) = 0.0281]                                                                                  |
| Completeness to theta = 67.01     | 98.5 %                                                                                                         |
| Absorption correction             | Semi-empirical from equivalents                                                                                |
| Max. and min. transmission        | 0.7529 and 0.5721                                                                                              |
| Refinement method                 | Full-matrix least-squares on F <sup>2</sup>                                                                    |
| Data / restraints / parameters    | 3380 / 0 / 272                                                                                                 |
| Goodness-of-fit on F <sup>2</sup> | 1.098                                                                                                          |
| Final R indices [I > 2σ(I)]       | R1 = 0.0394, wR2 = 0.1233                                                                                      |
| R indices (all data)              | R1 = 0.0398, wR2 = 0.1239                                                                                      |
| Absolute structure parameter      | 0.08(2)                                                                                                        |
| Extinction coefficient            | 0.0020(5)                                                                                                      |
| Largest diff. peak and hole       | 0.344 and -0.264 e. Å <sup>-3</sup>                                                                            |

## 8. NMR Spectra

2010186XUGQ7-66-1

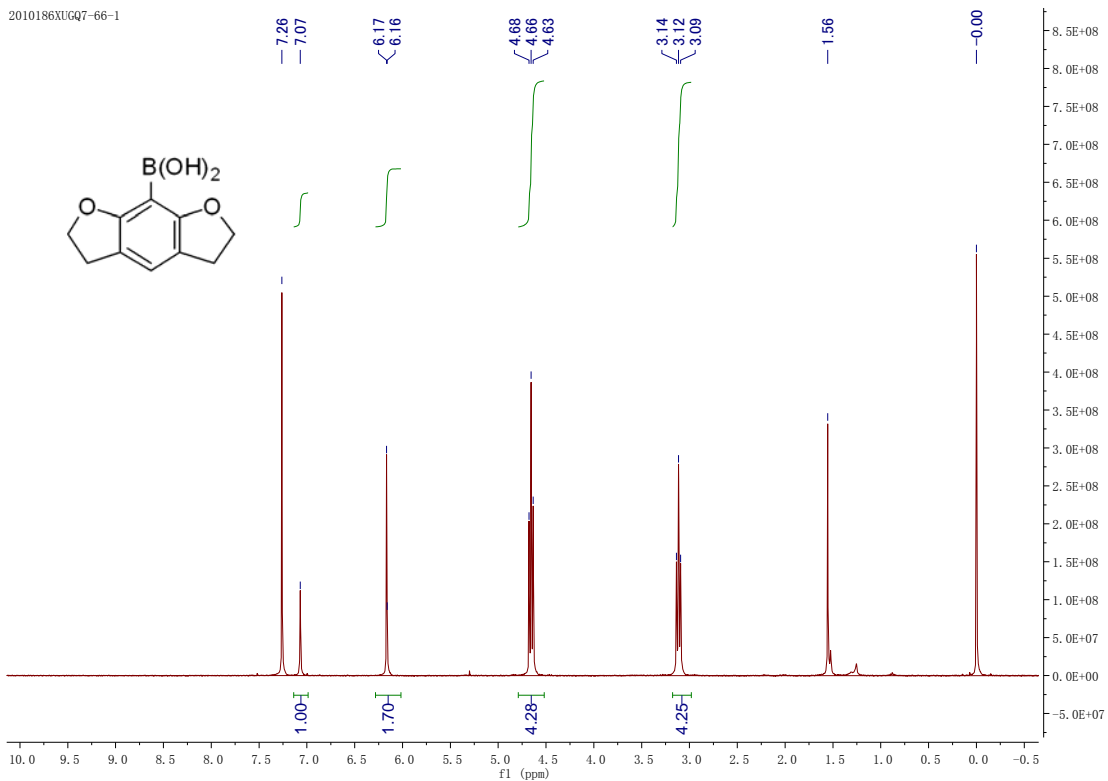

PROTON\_01  
2010186XUGQ14-37-1

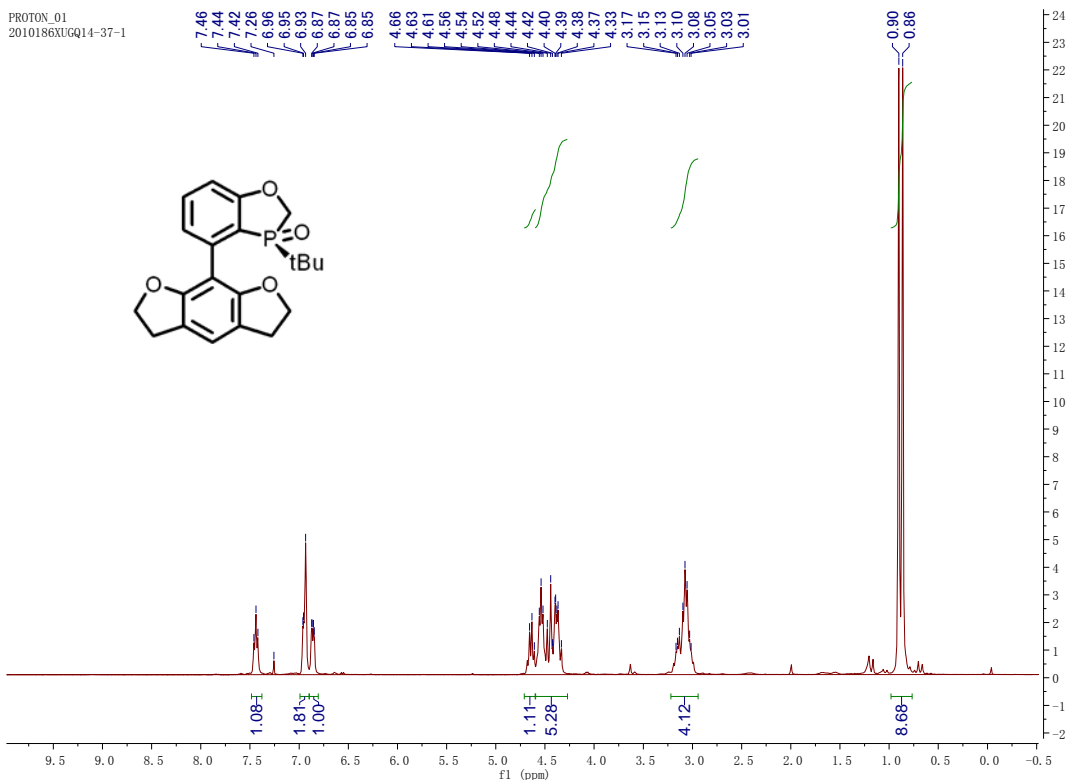

PHOSPHORUS\_01  
2010186XUGQ14-37-1

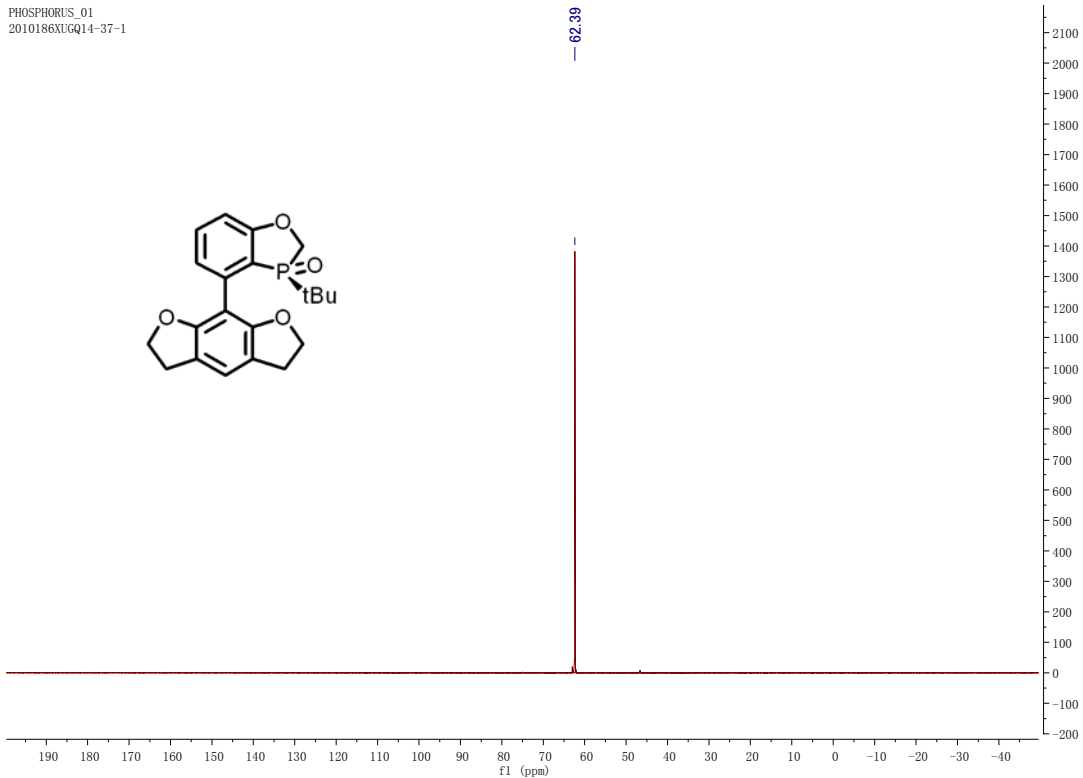

2010186xugq14-37-1-c

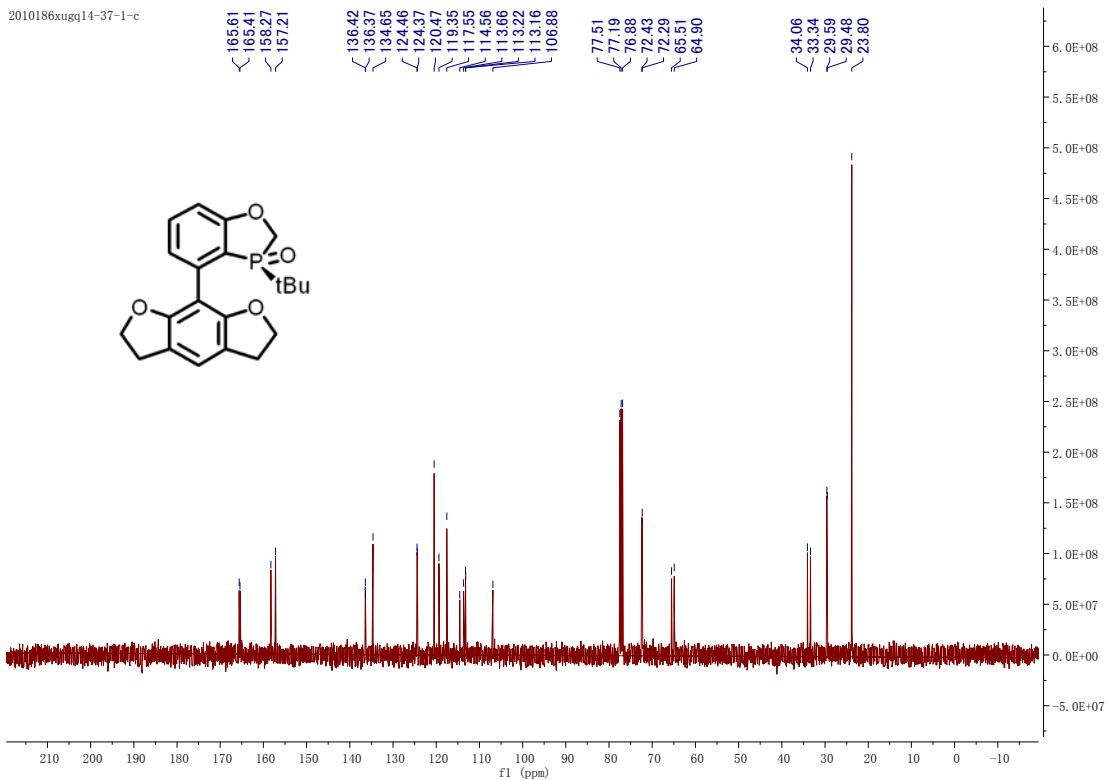

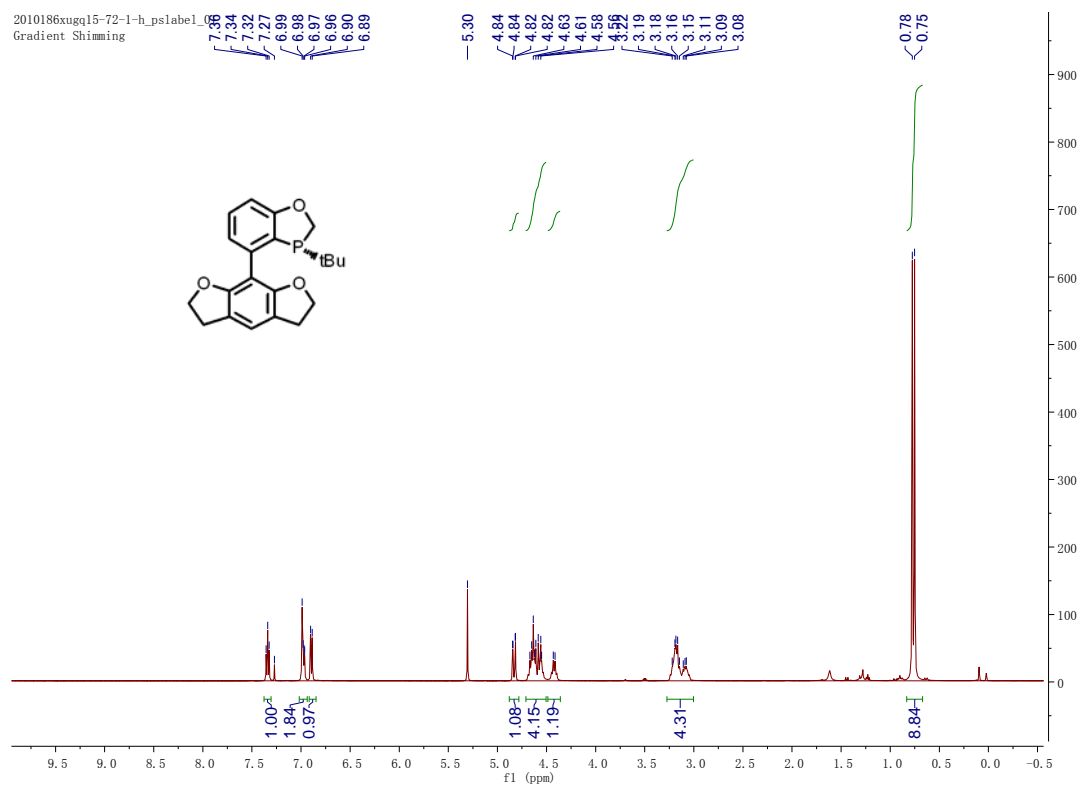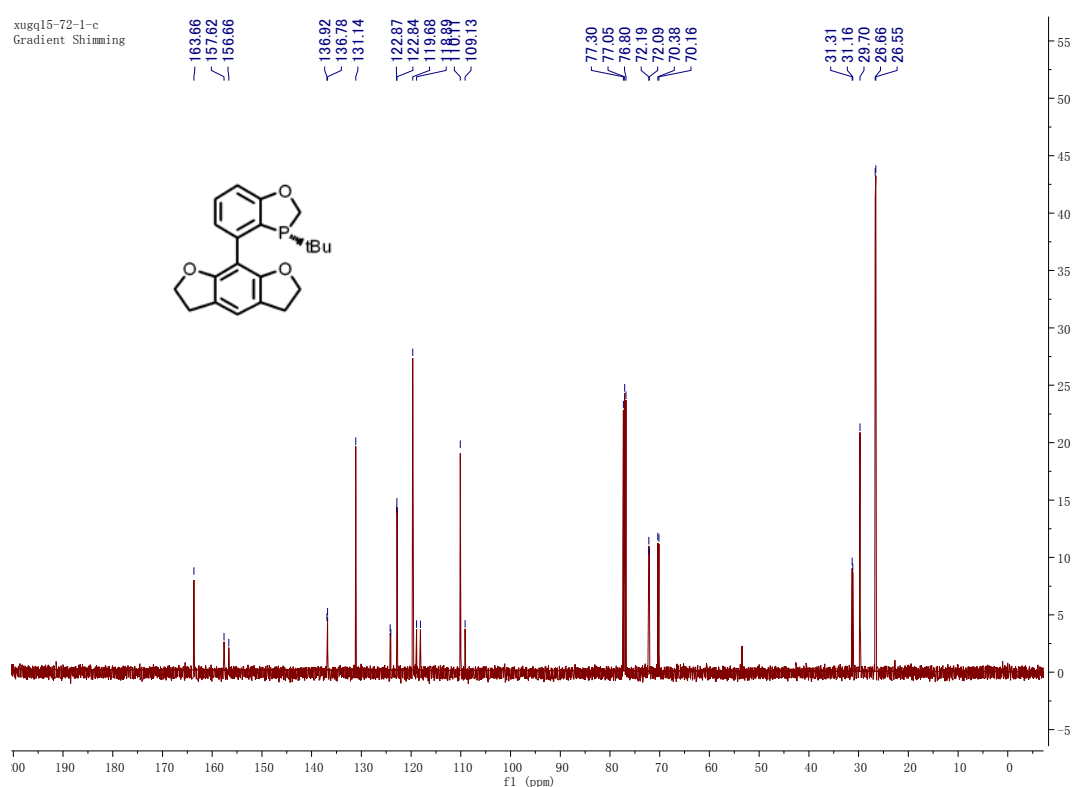

PHOSPHORUS\_01  
2010186XUGQ15-72-1

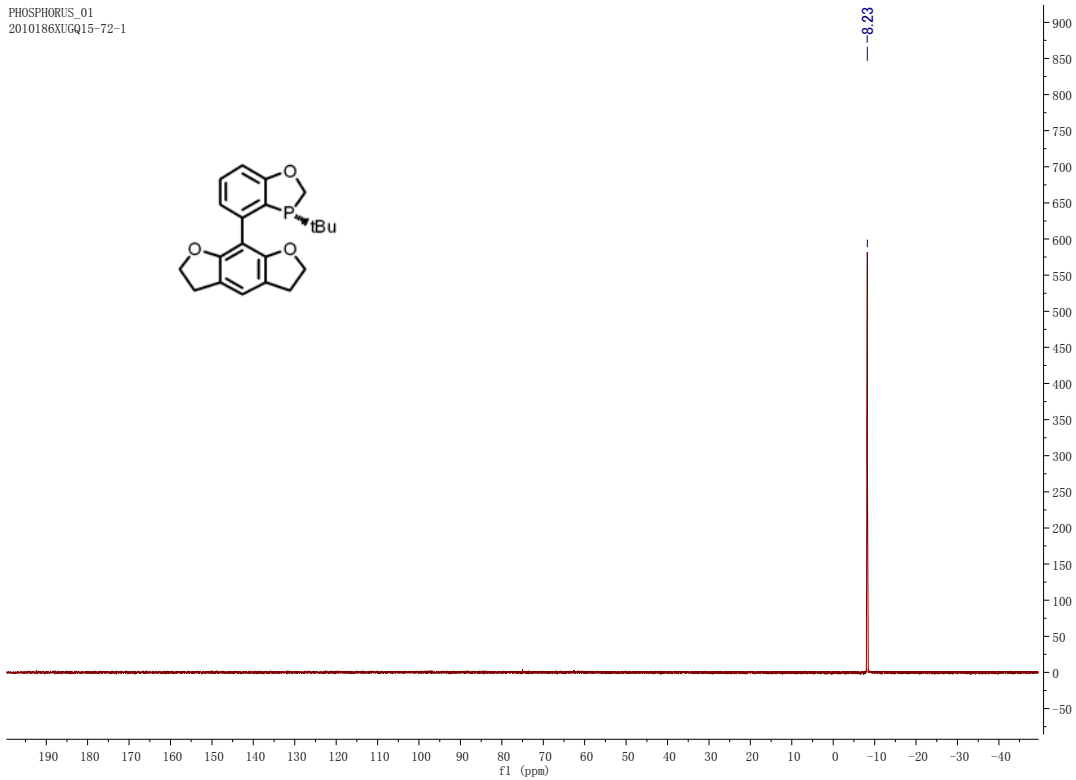

PROTON\_01  
test001

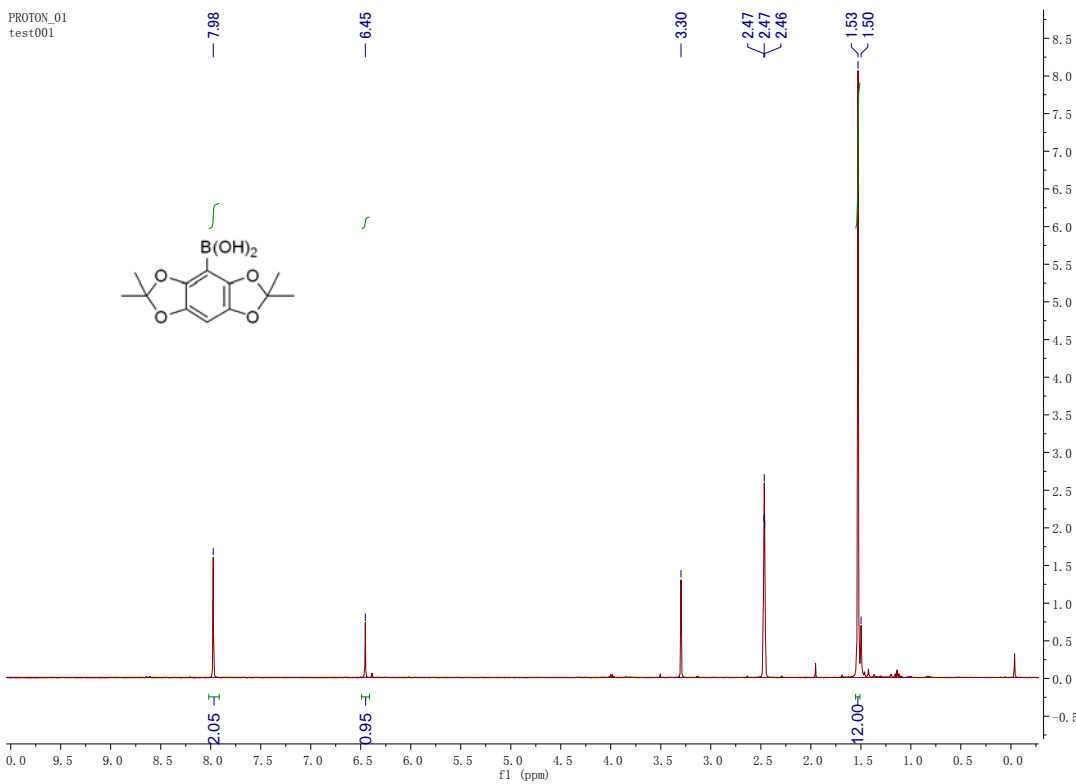

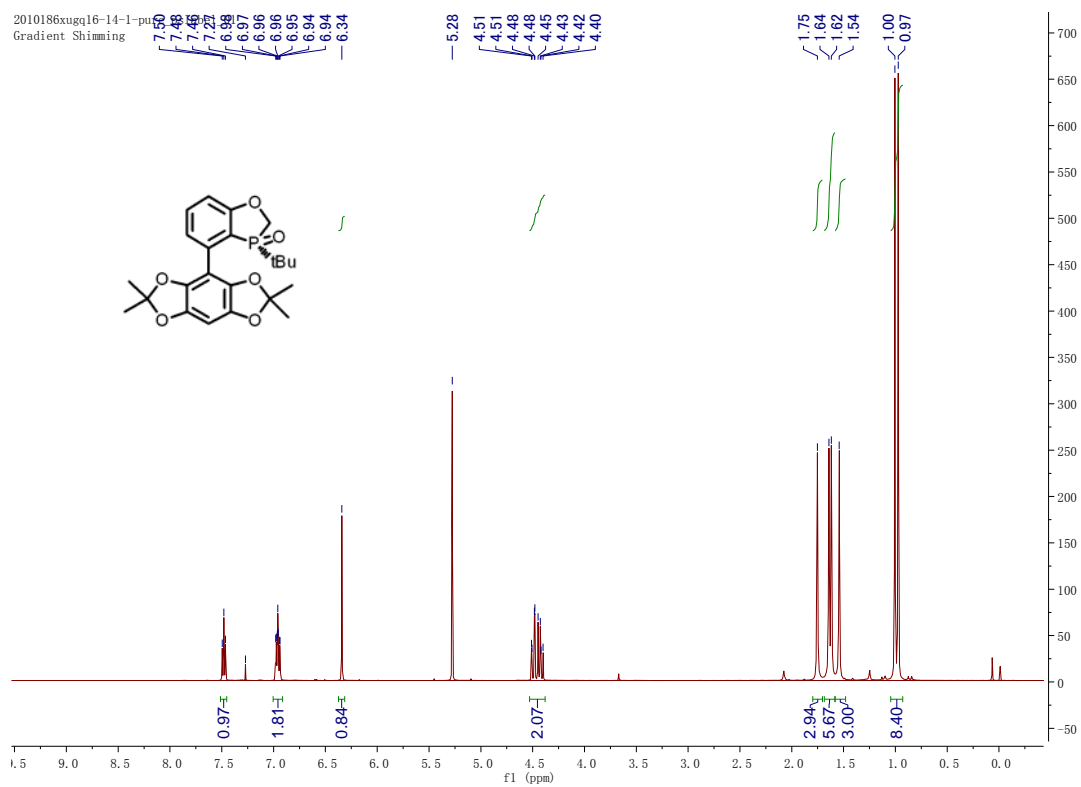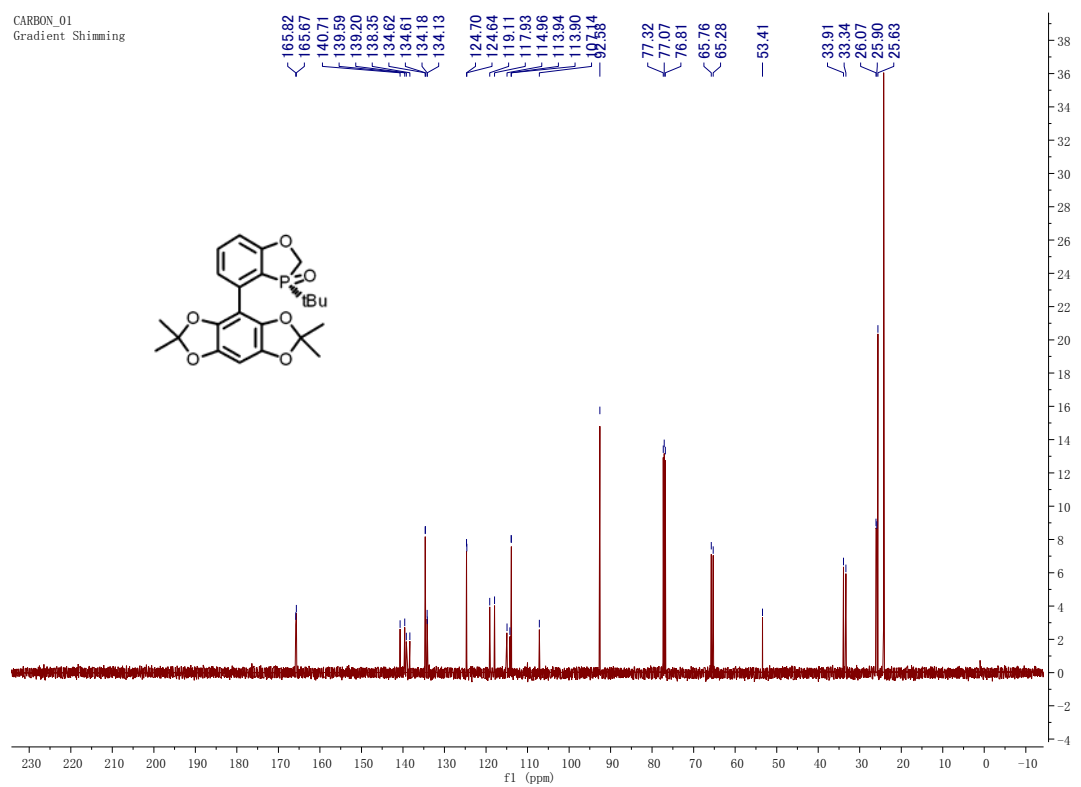



PHOSPHORUS\_01  
2010186XUGQ16-14-1-P

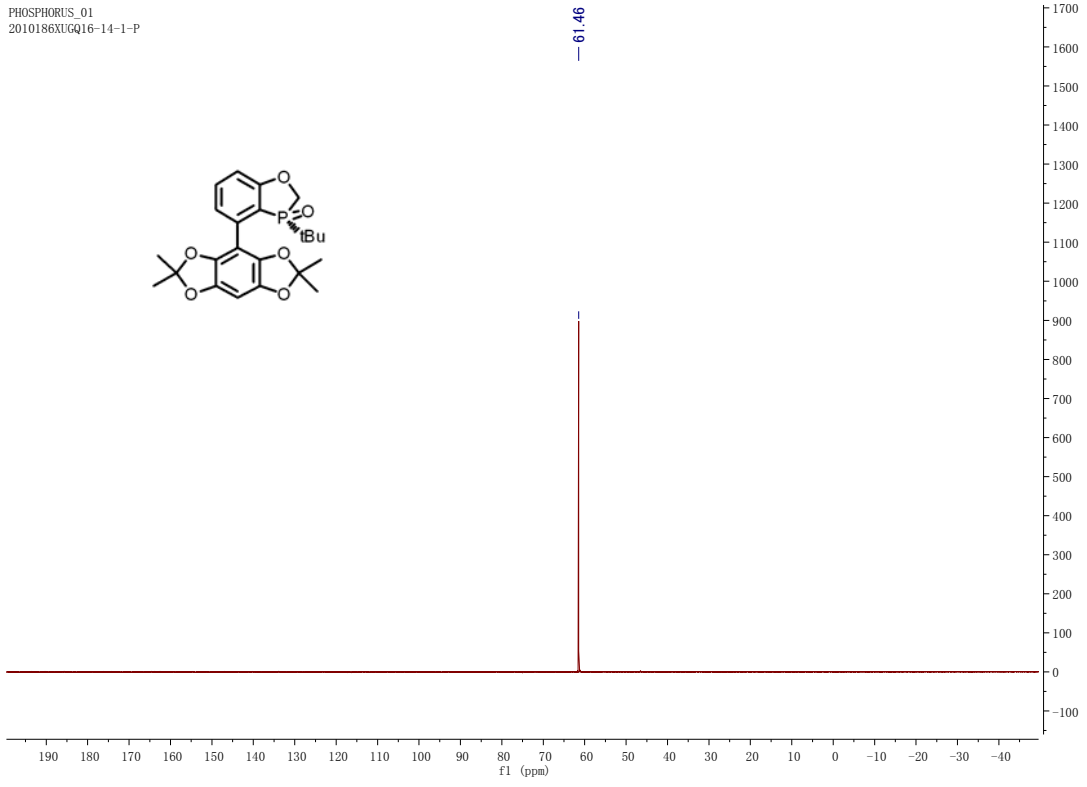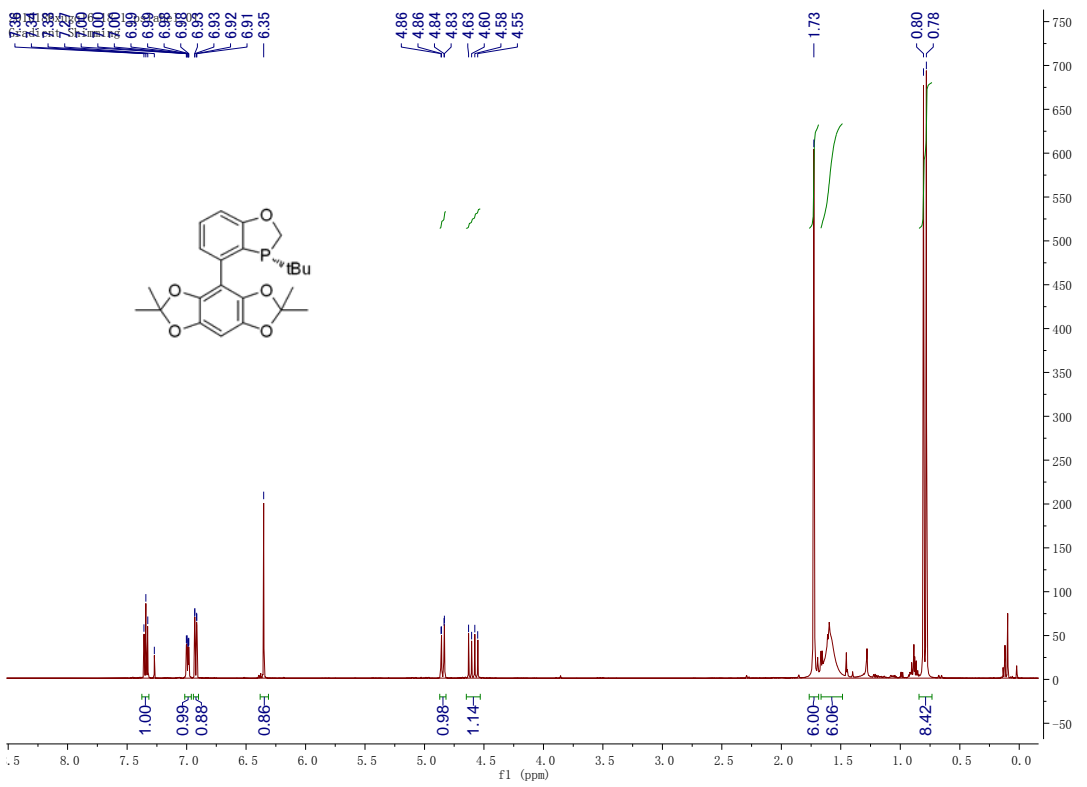

2010186xugq16-18-1\_label\_02  
2010186xugq16-18-1

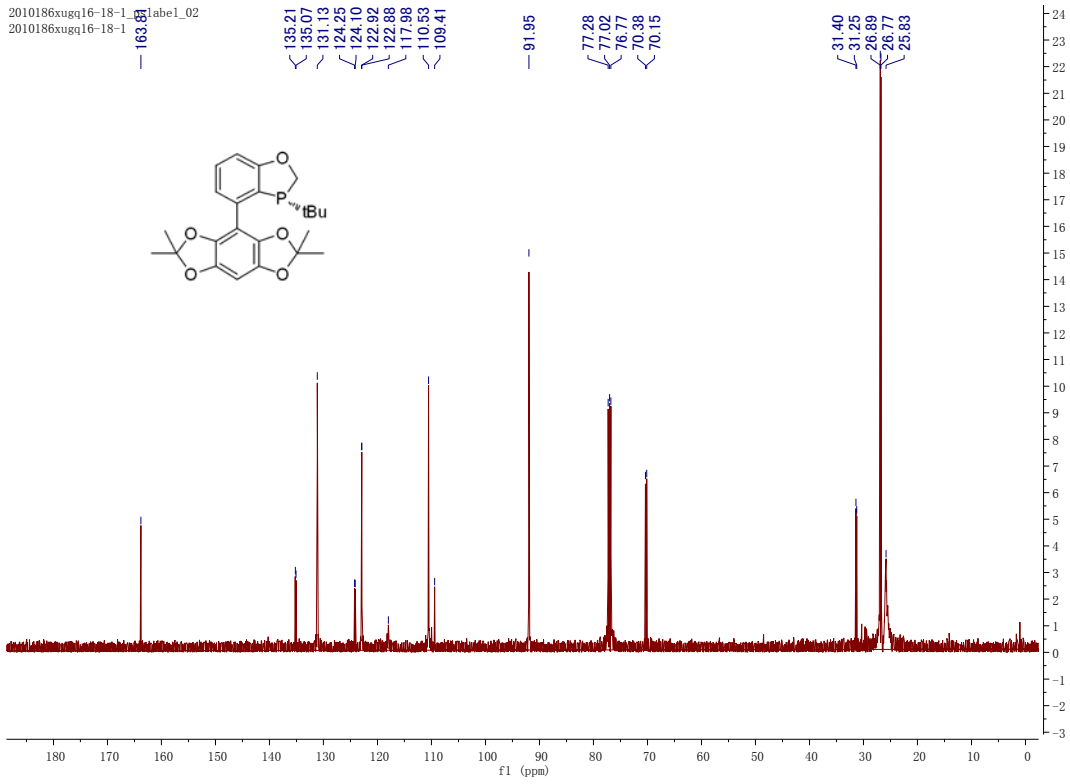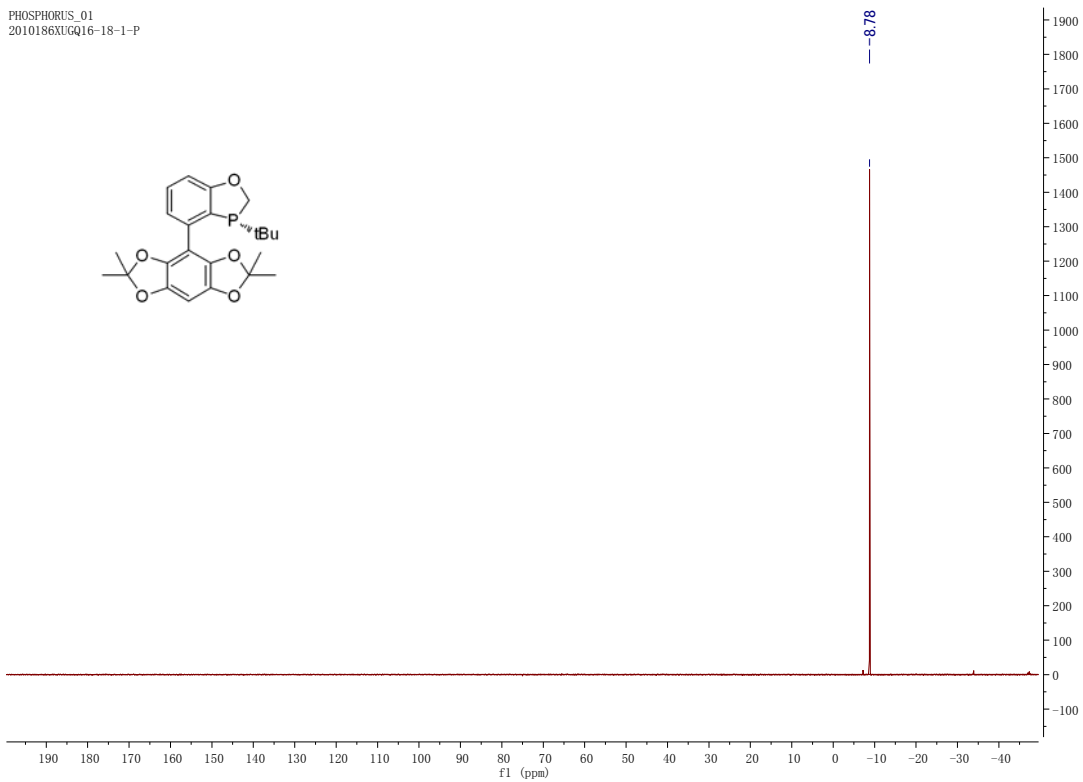

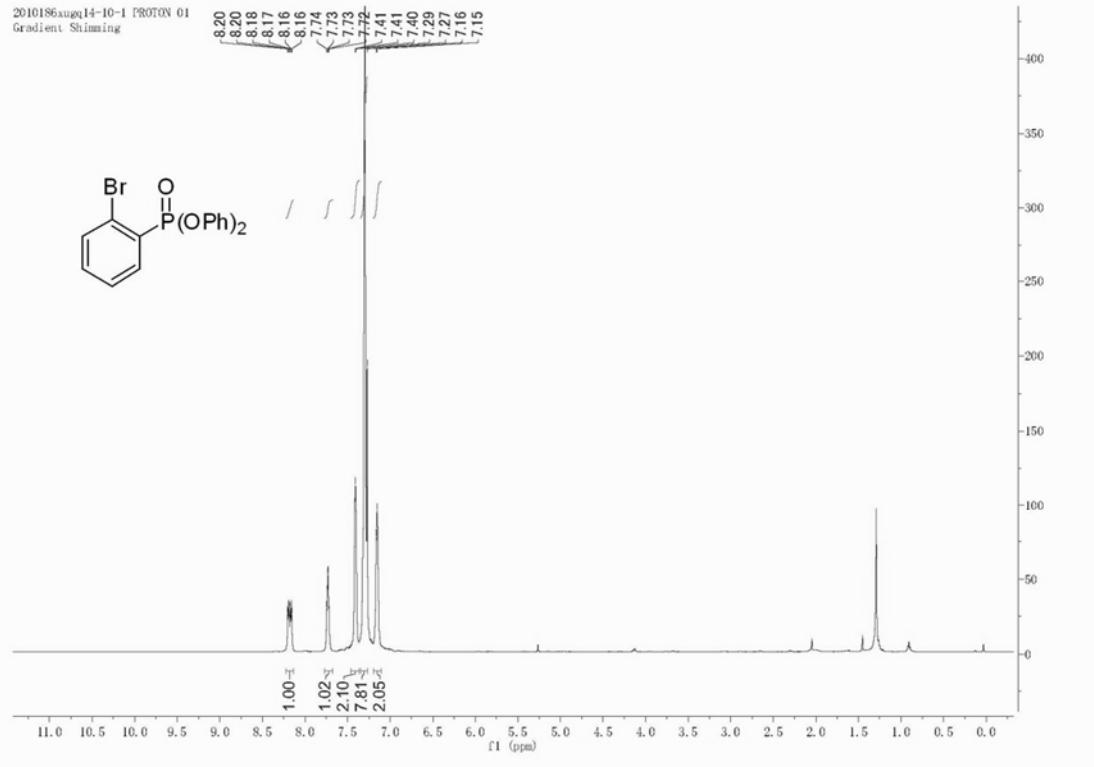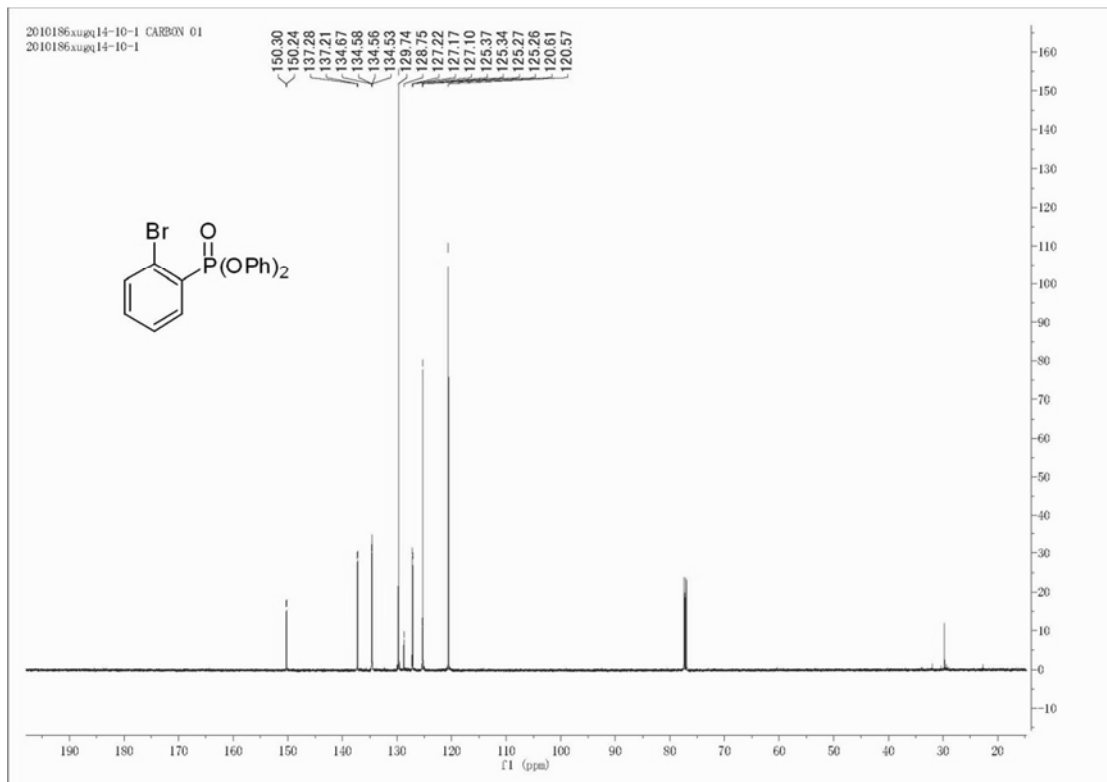

PHOSPHORUS 01  
test001

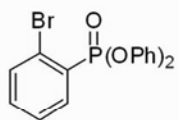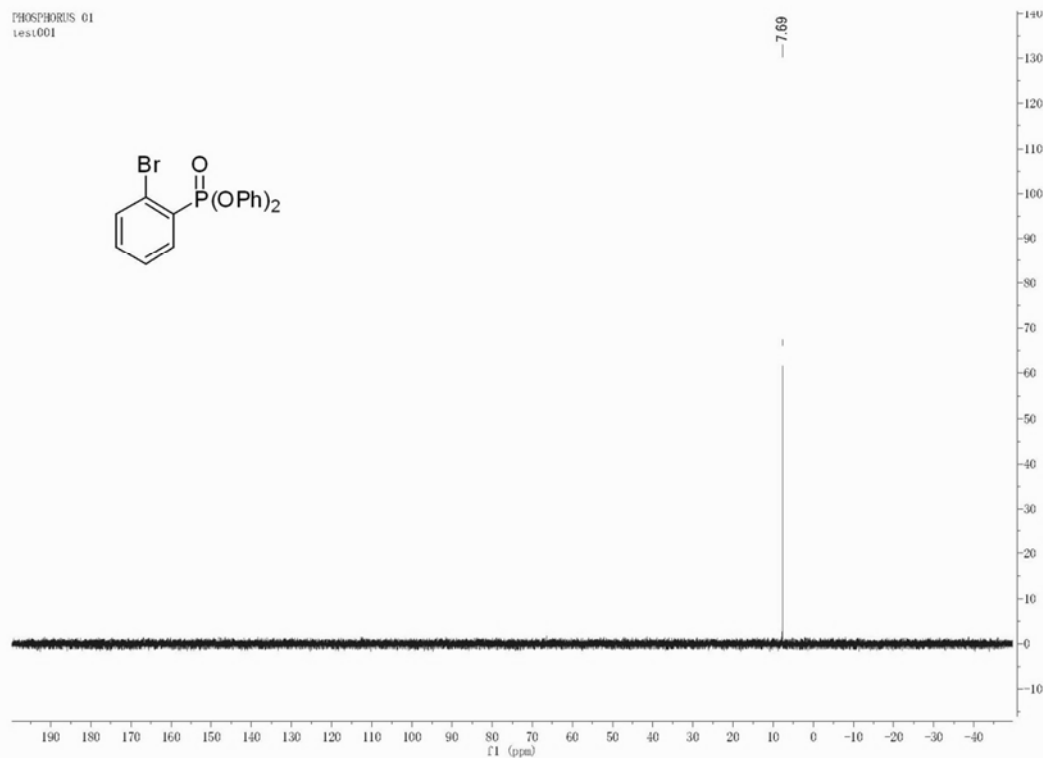

2014730-2-74-1a15 pslabel 01  
Gradient Shimming

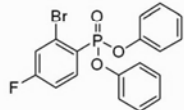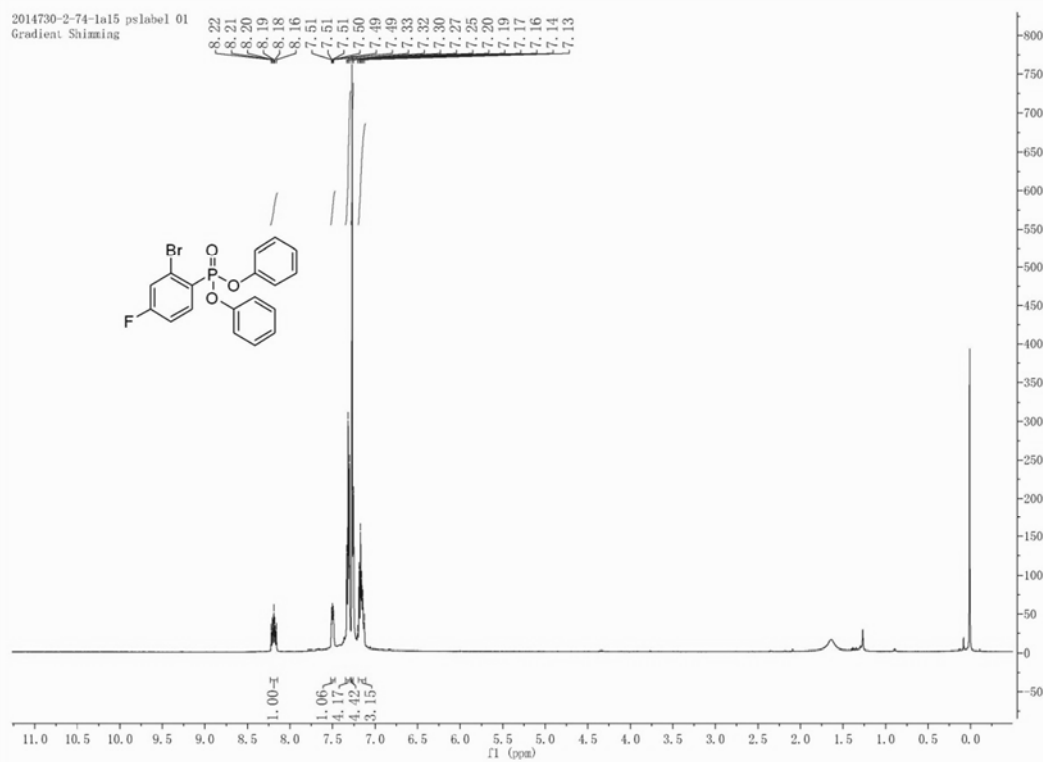

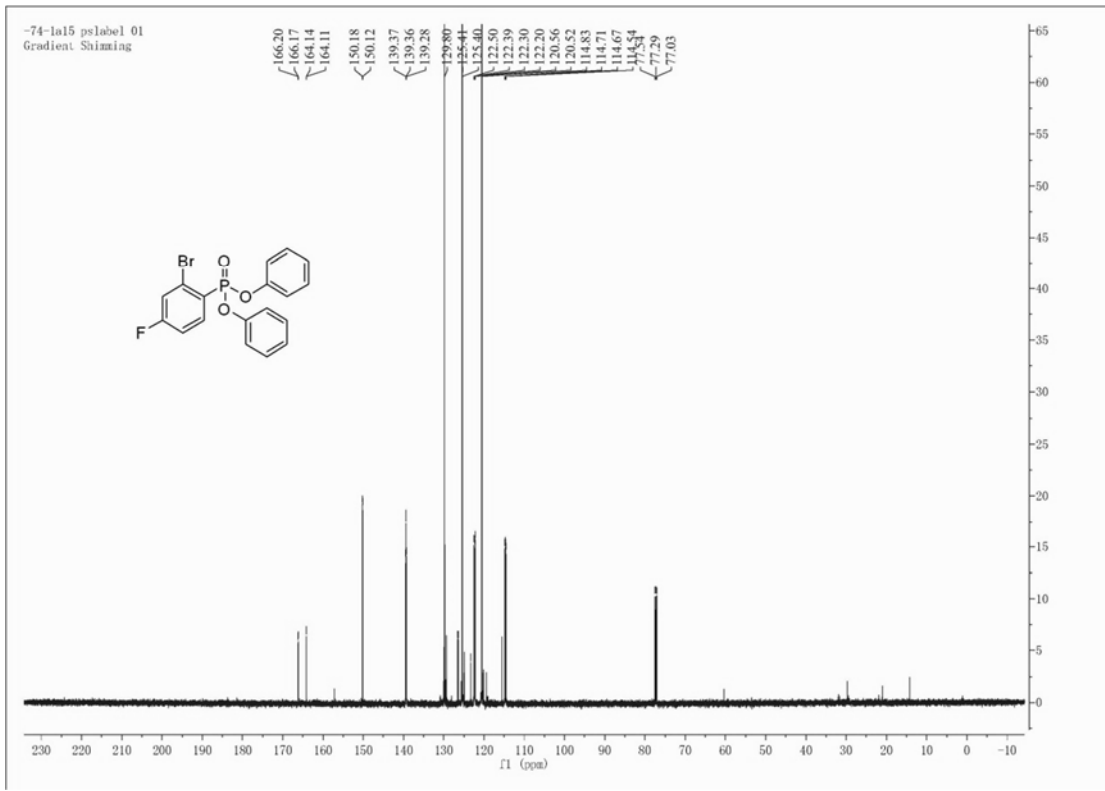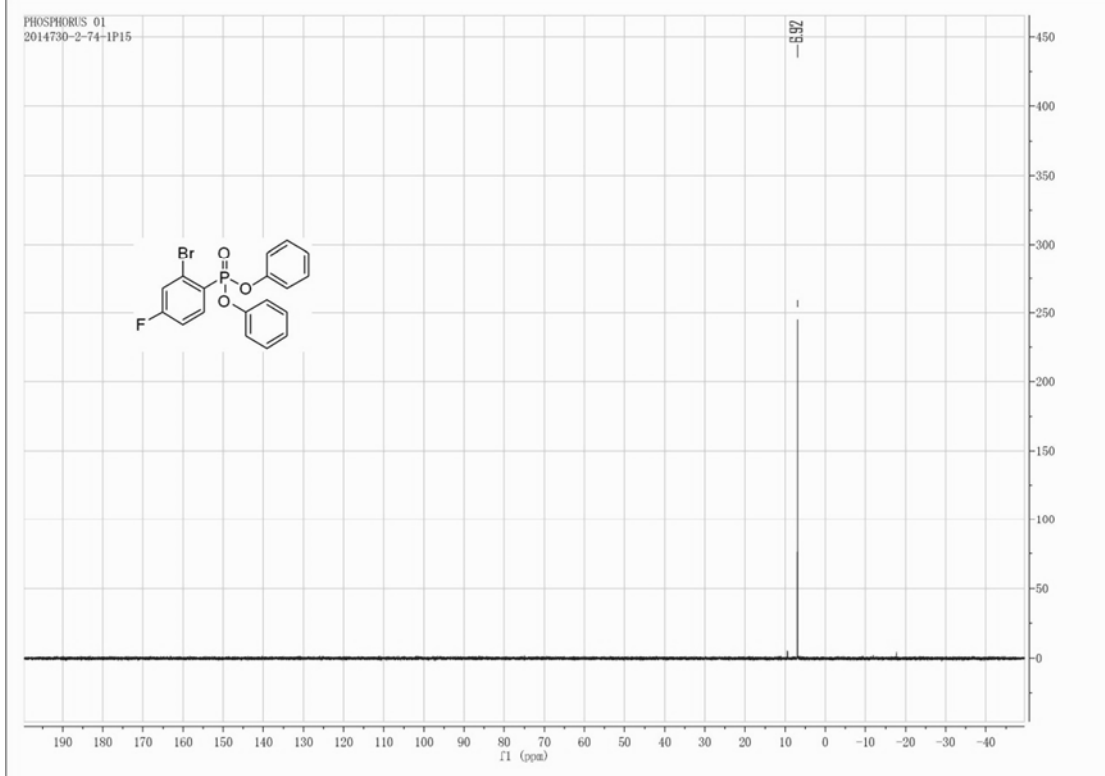

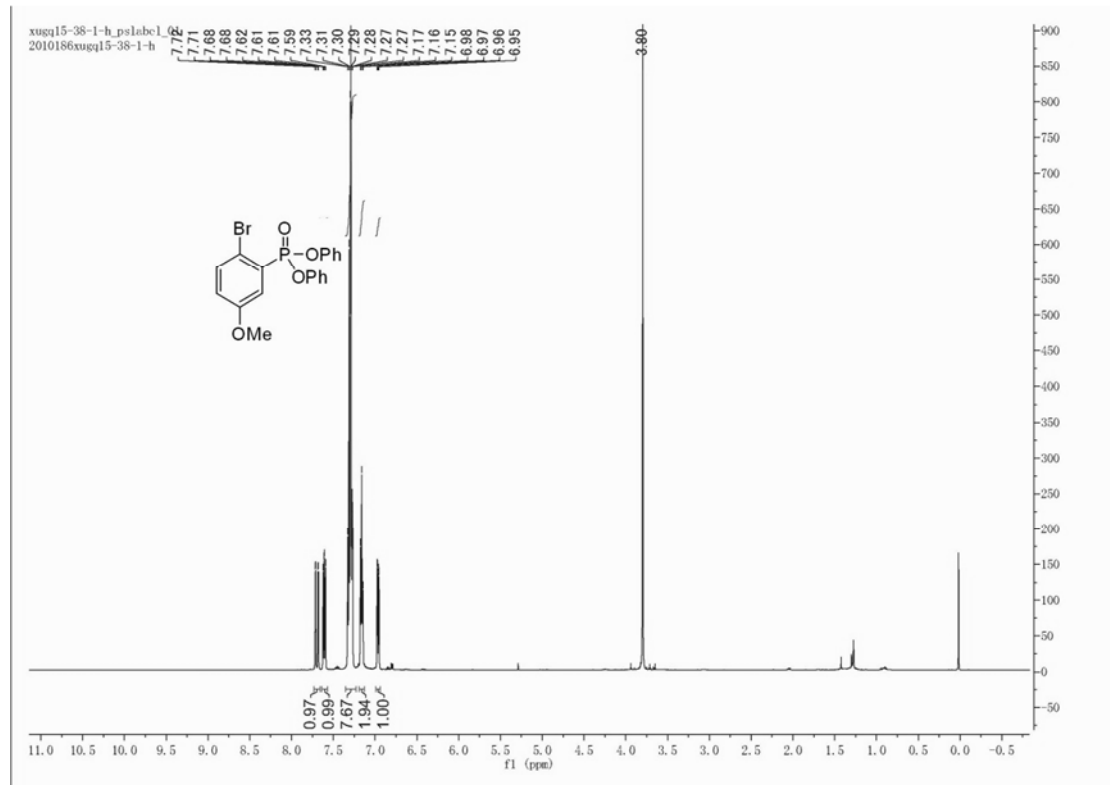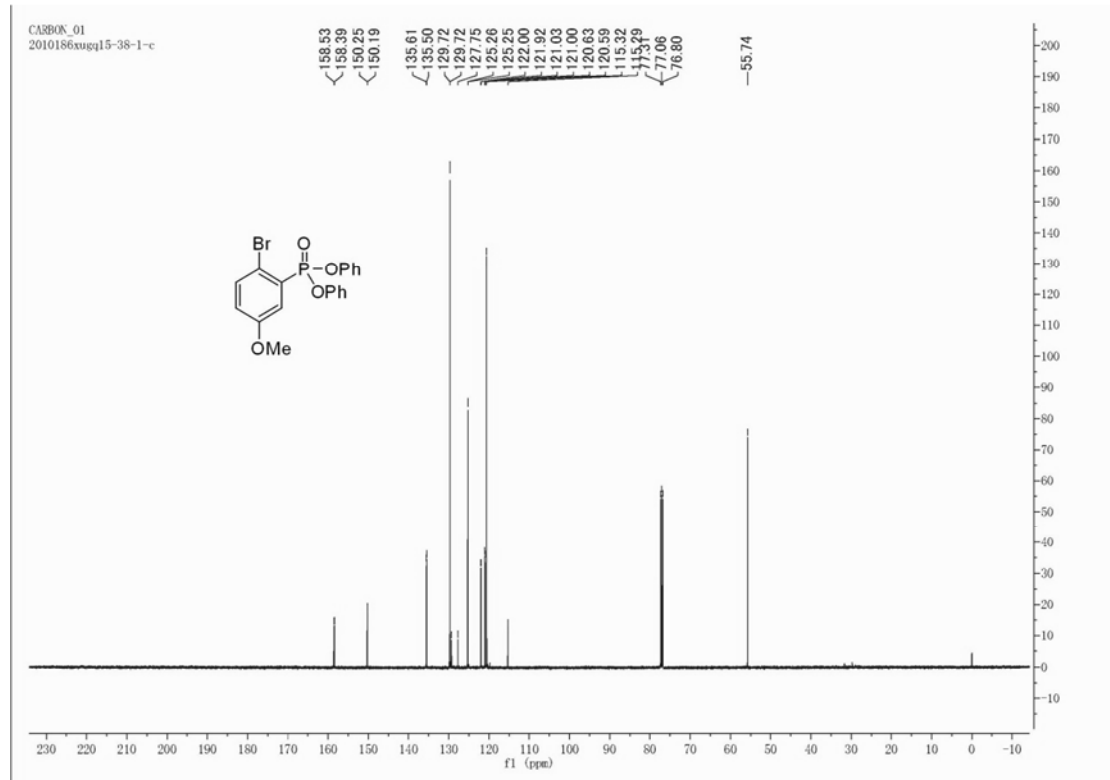

PHOSPHORUS\_01  
2010186XU6Q15-38-1-P

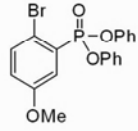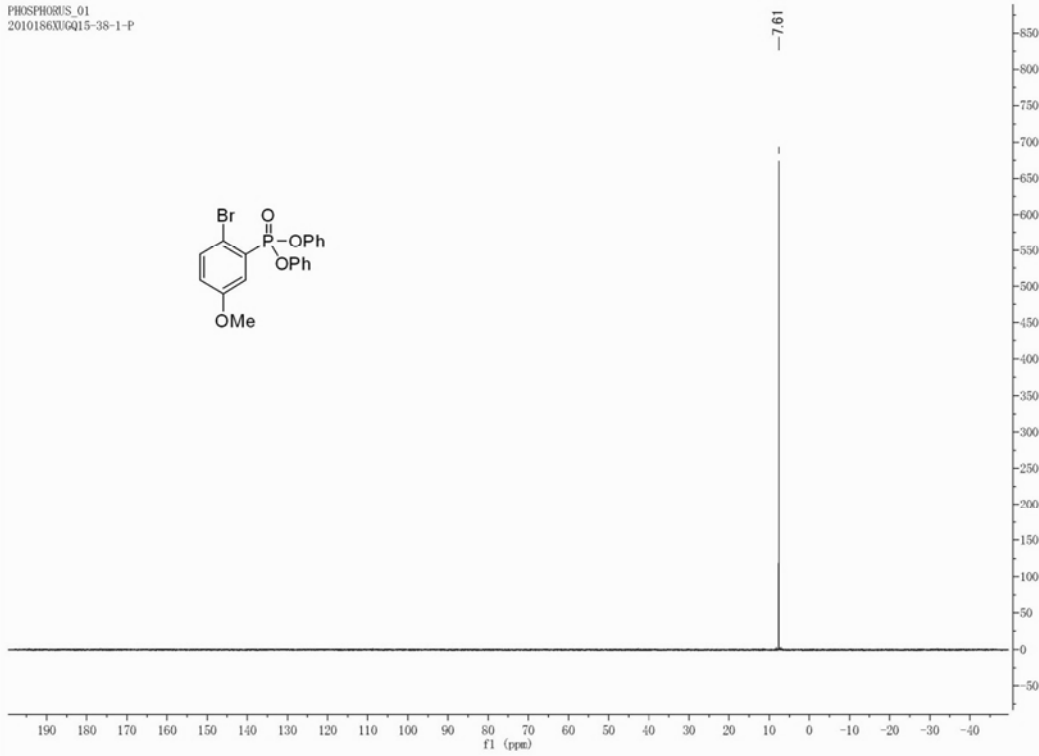

2014730-34-2  
Gradient Shifting

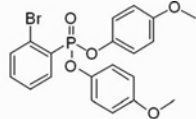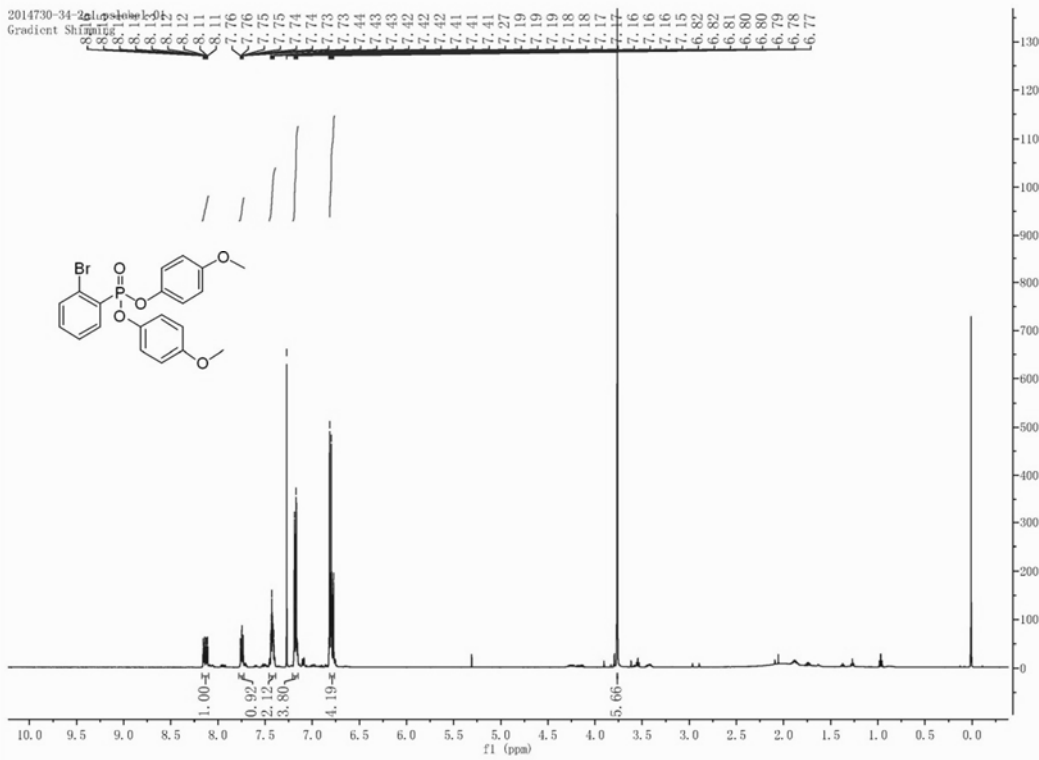

2014730-74-1a9  
Gradient Shimming

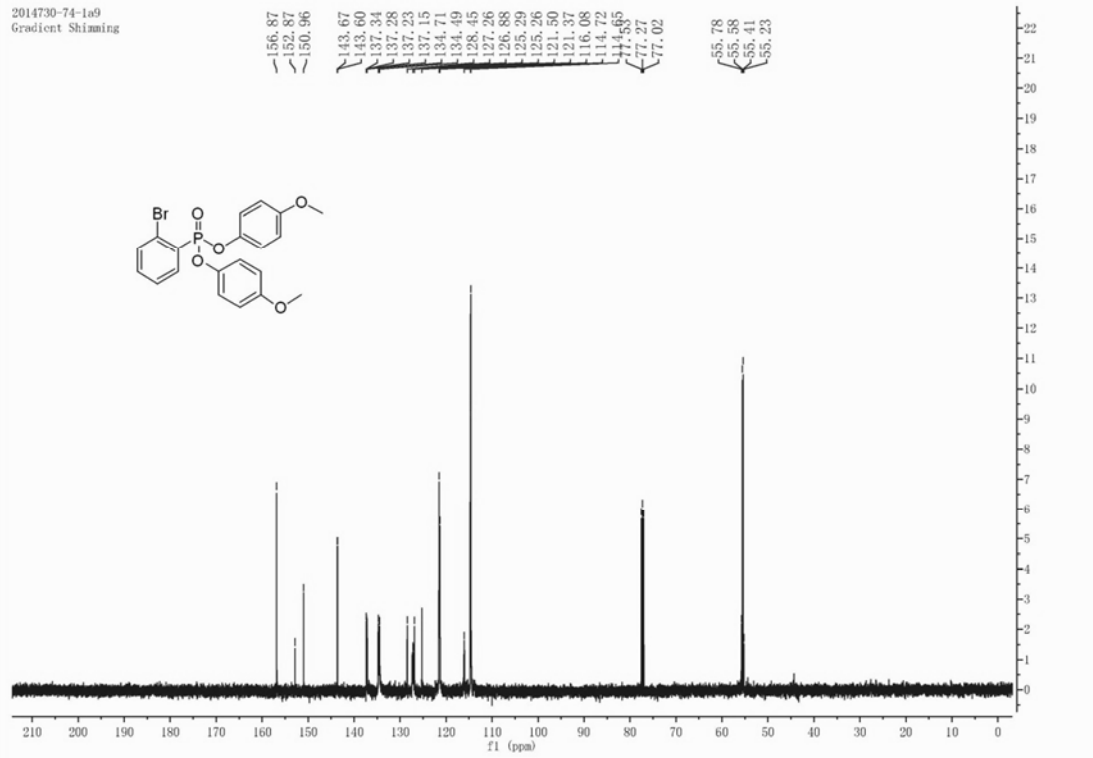

PHOSPHORUS 01  
2014730-2-74-1P9

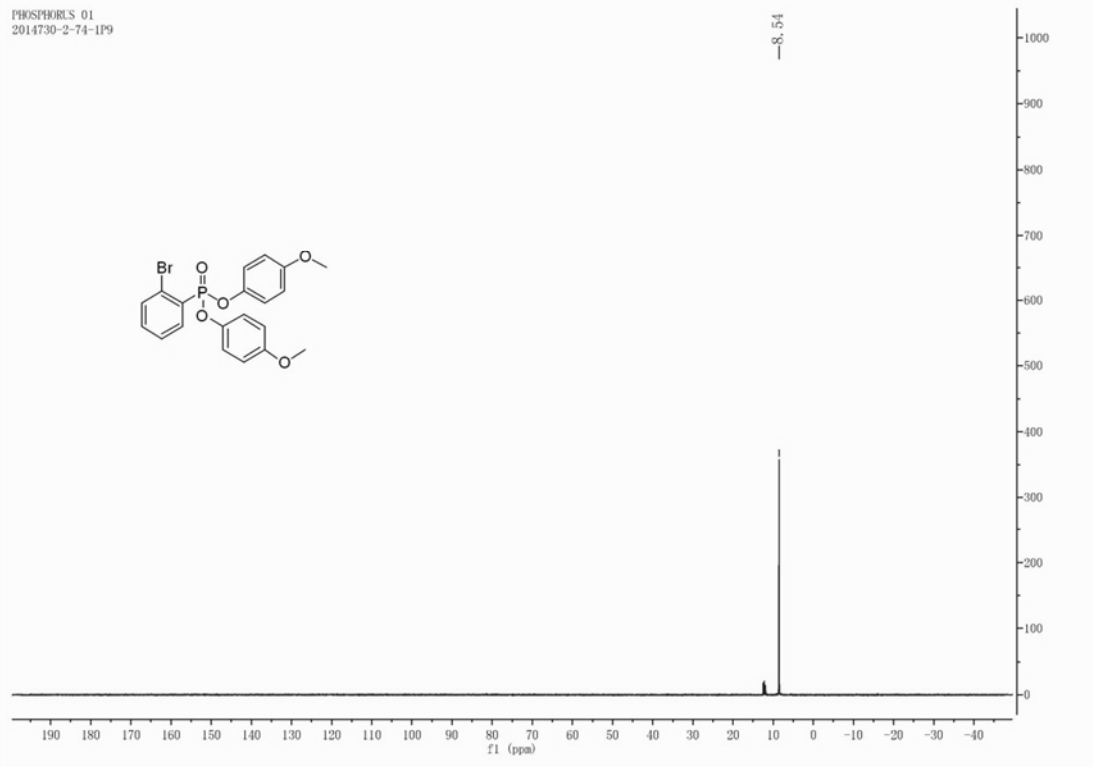



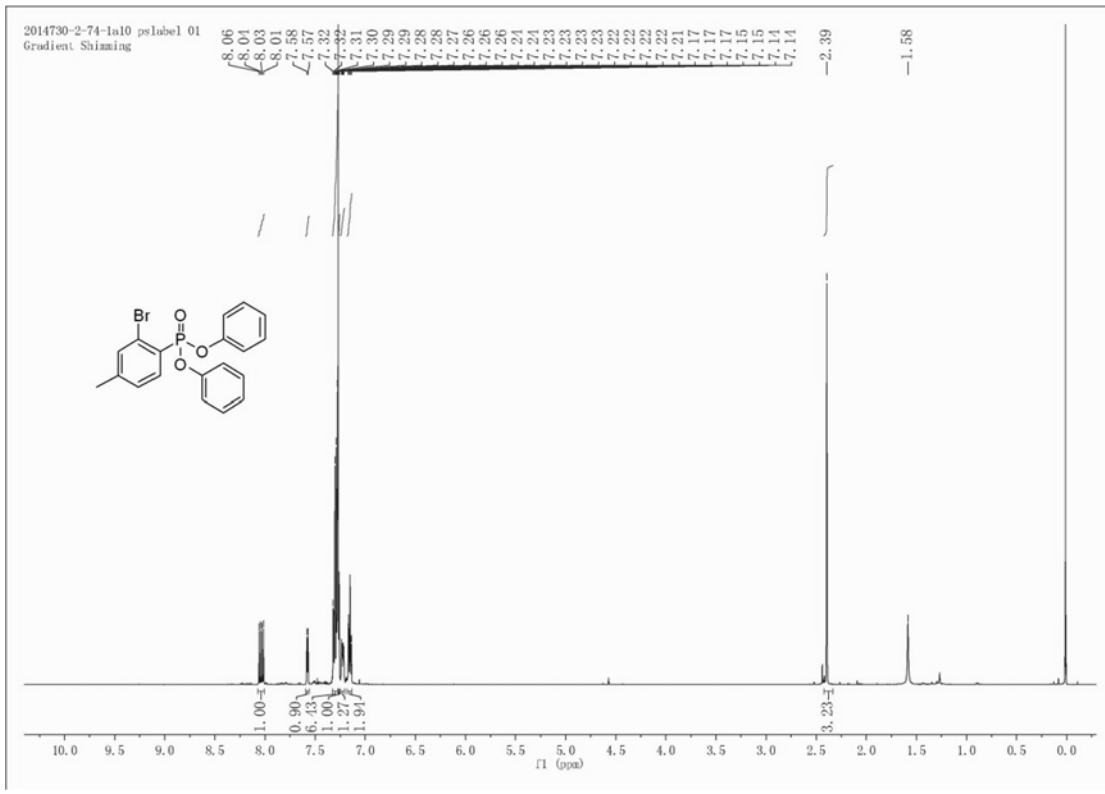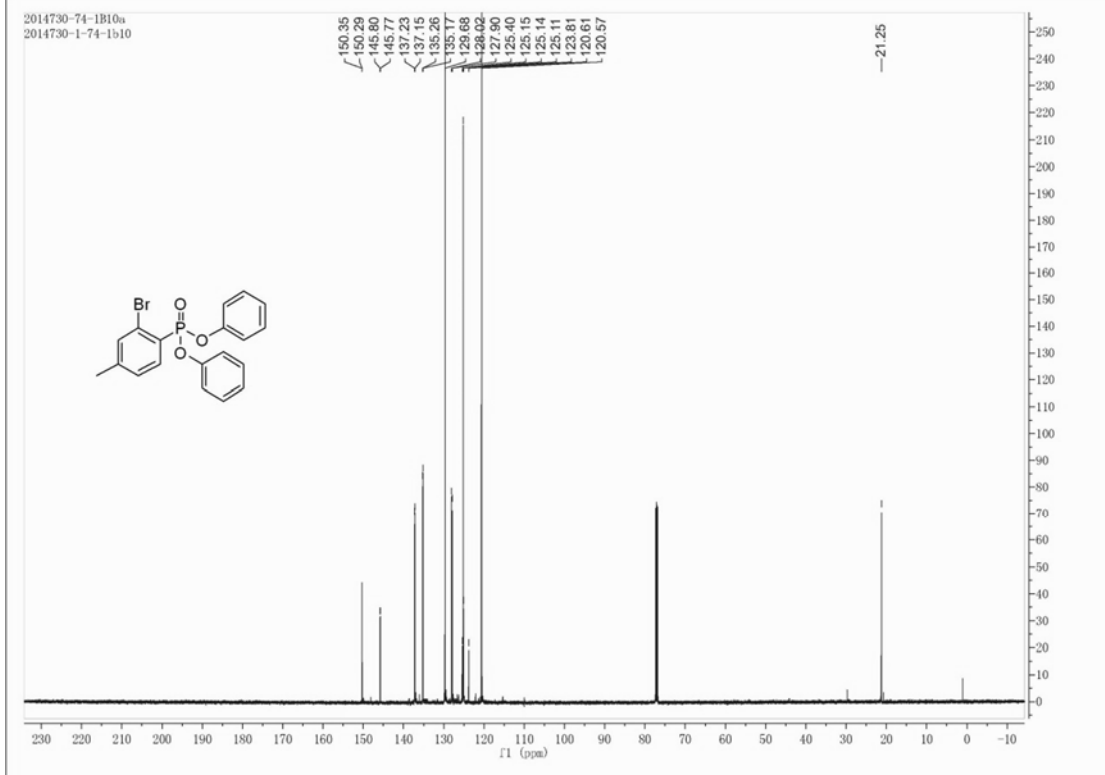

PHOSPHORUS 01  
2014730-2-74-1P10

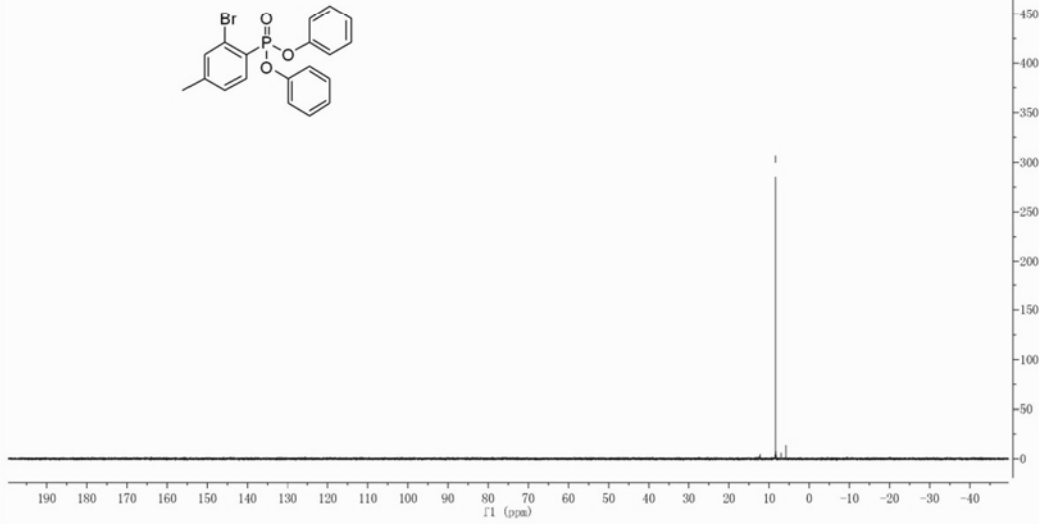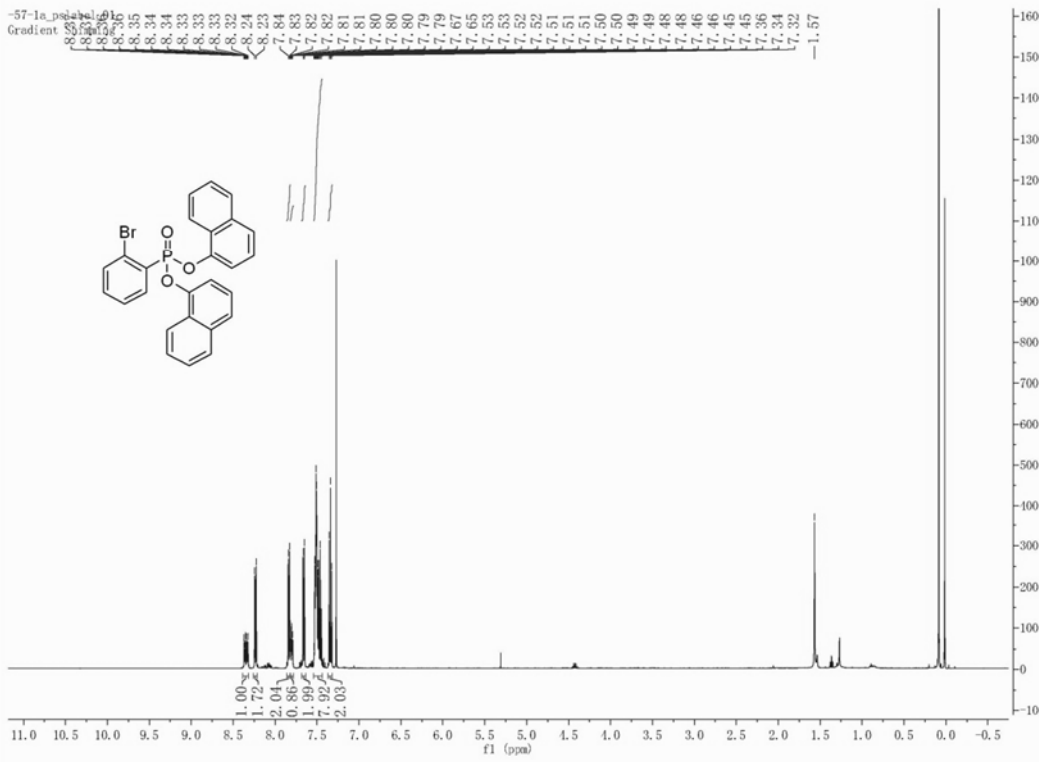

2014730-74-1a12\_pslabel\_01  
Gradient Shimming

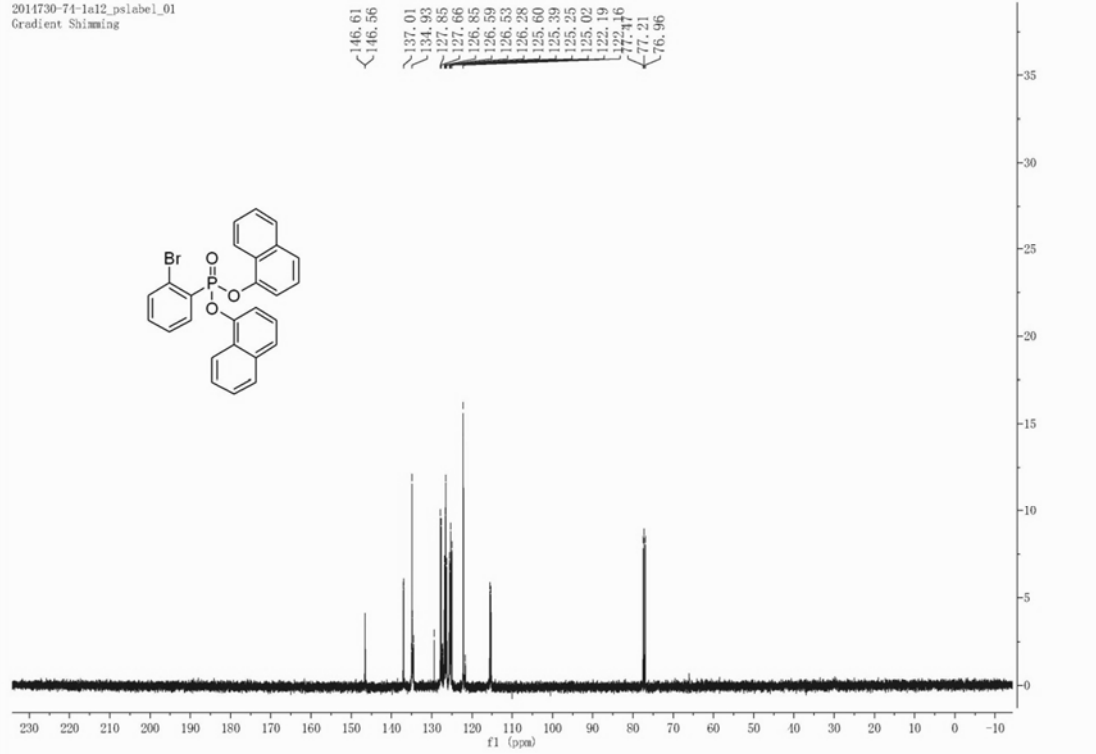

PHOSPHORUS\_01  
2014730-2-74-1P12

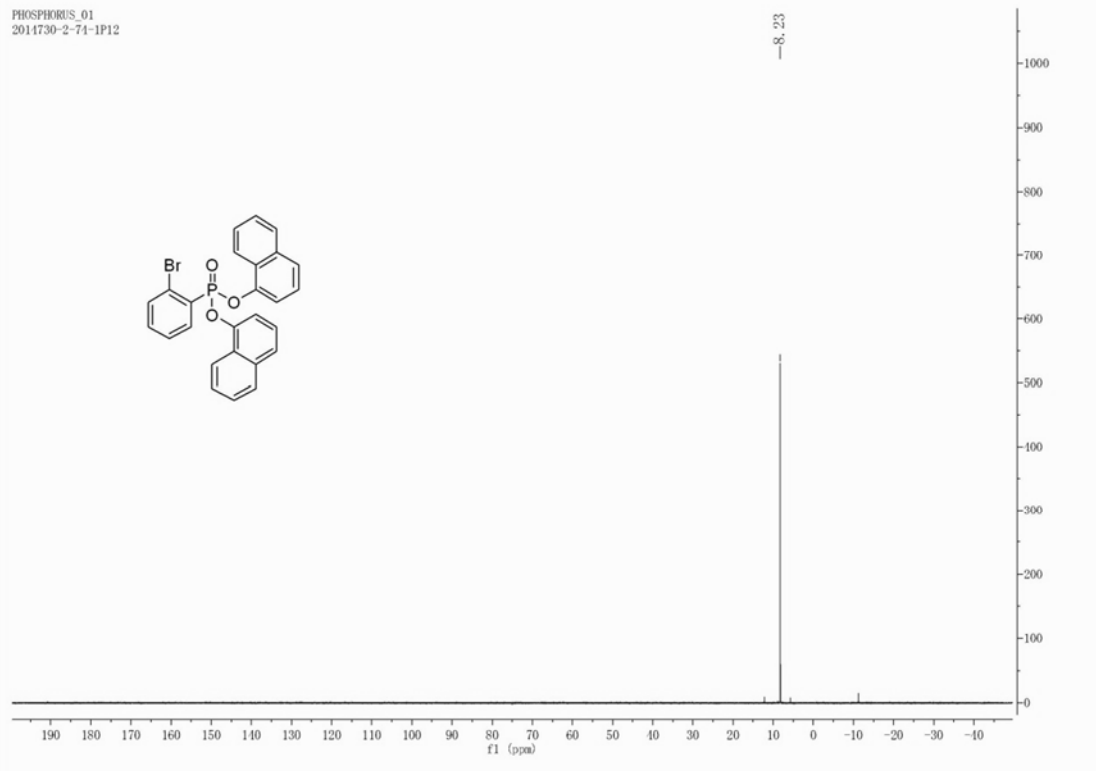

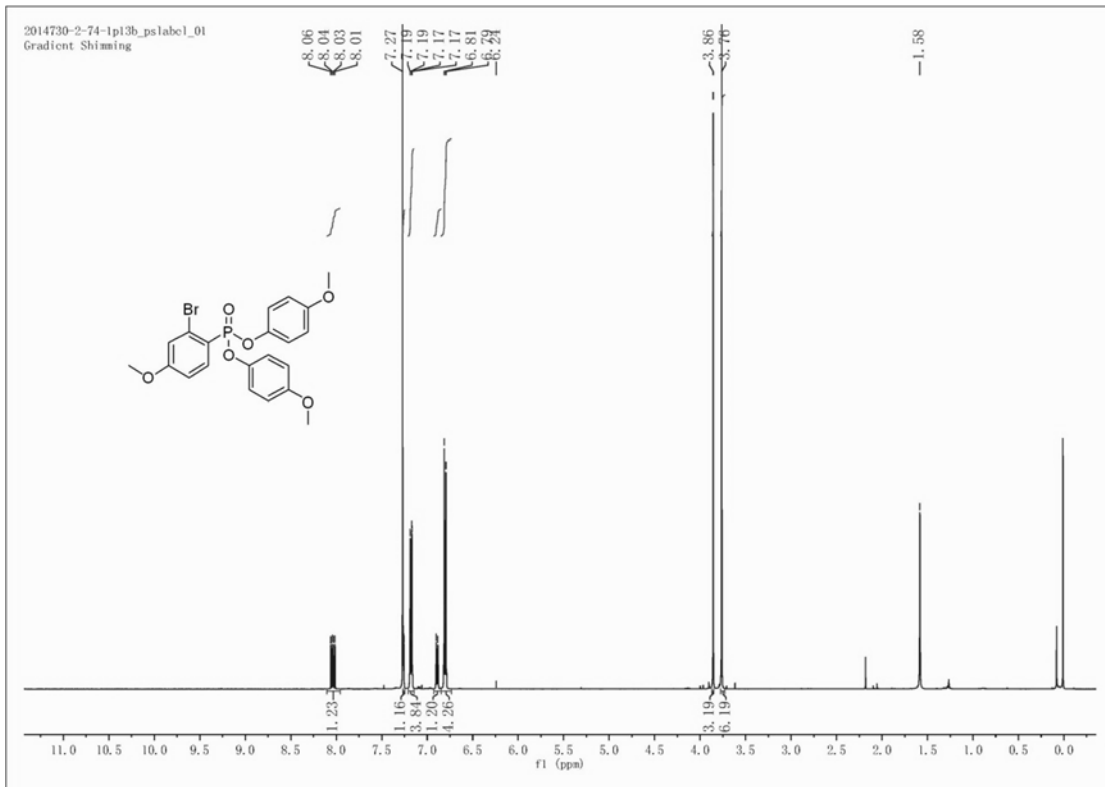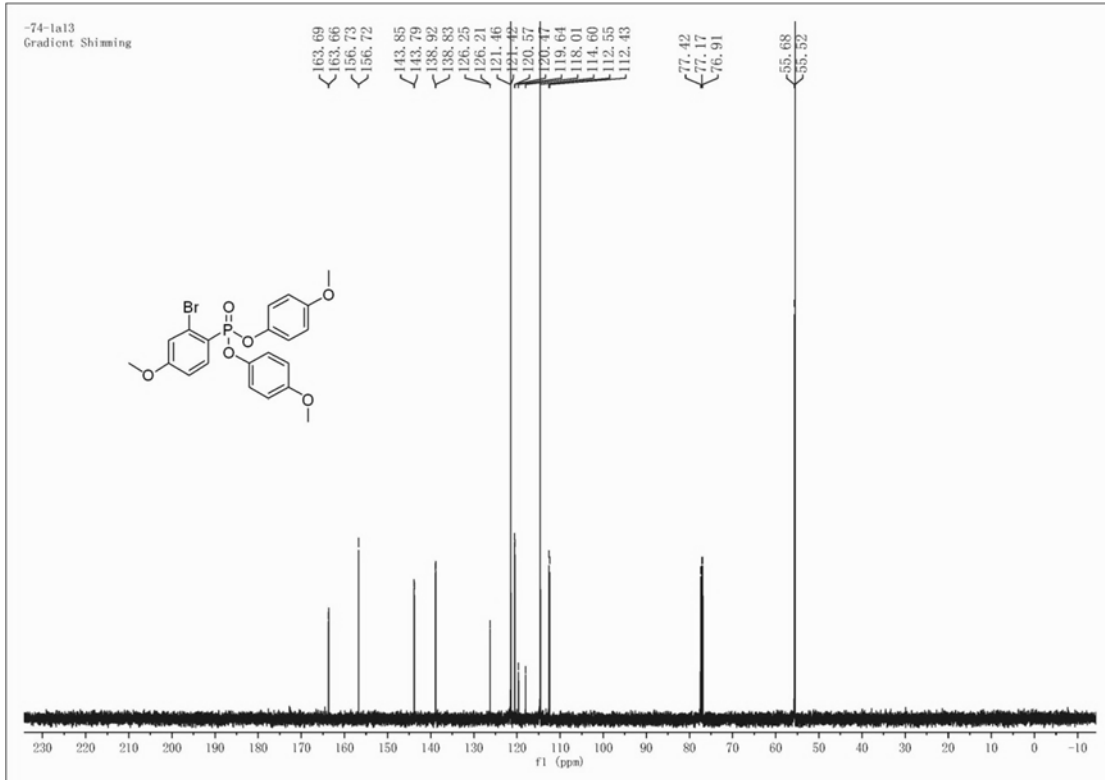

PHOSPHORUS\_01  
2014730-2-74-1P13

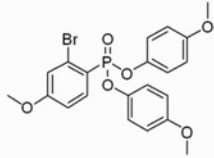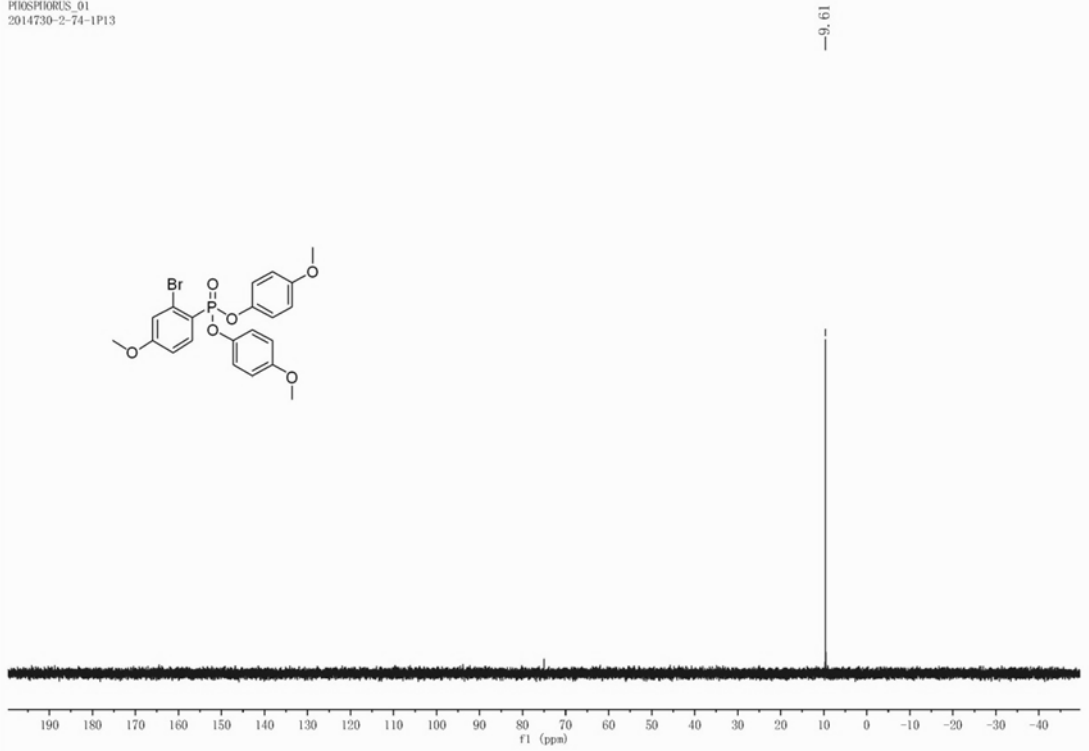

PROTON 01  
test001

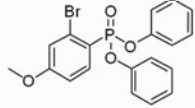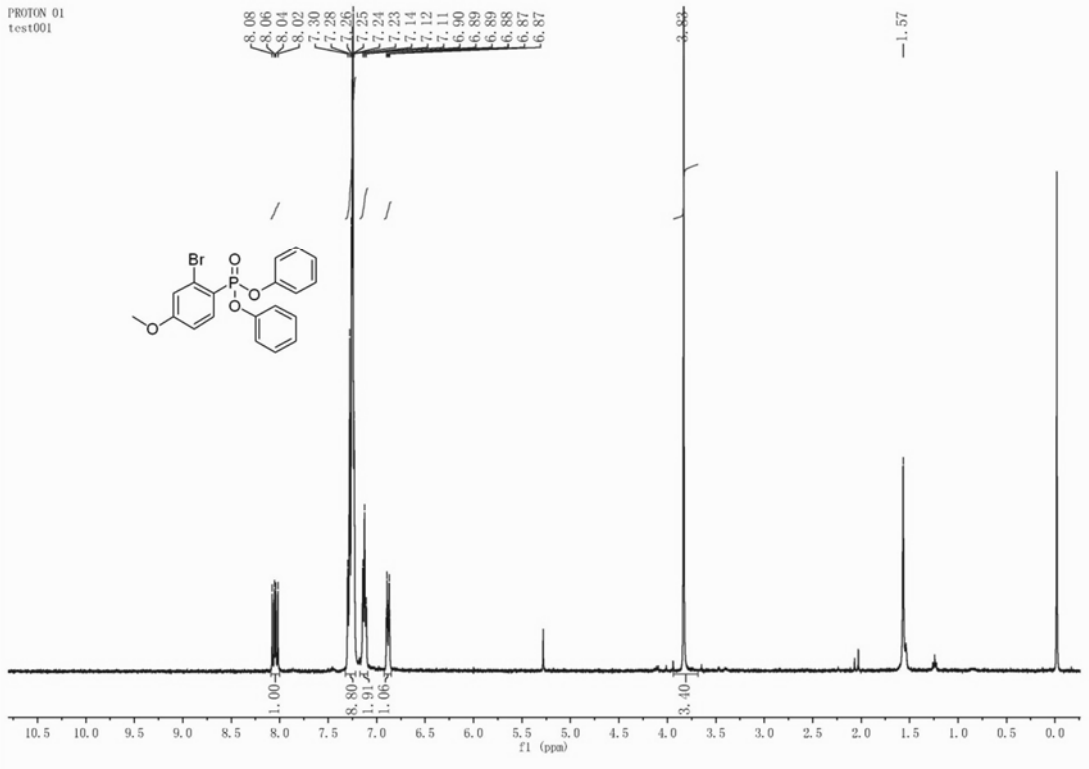

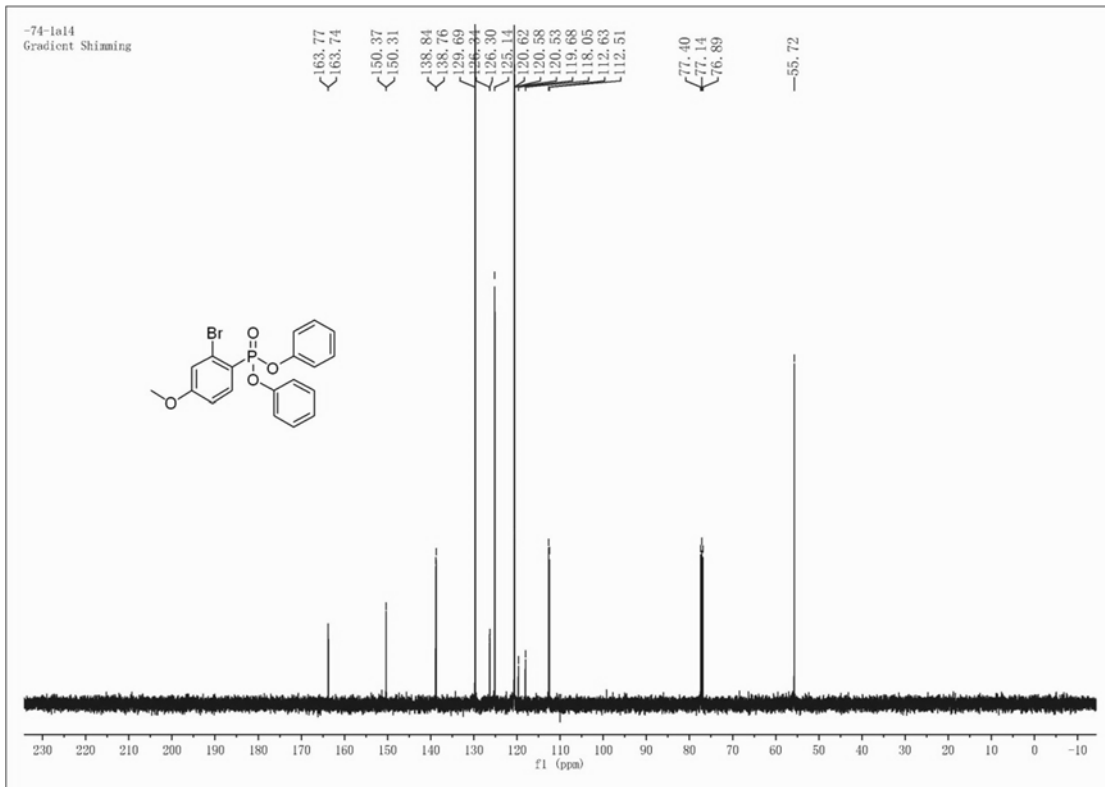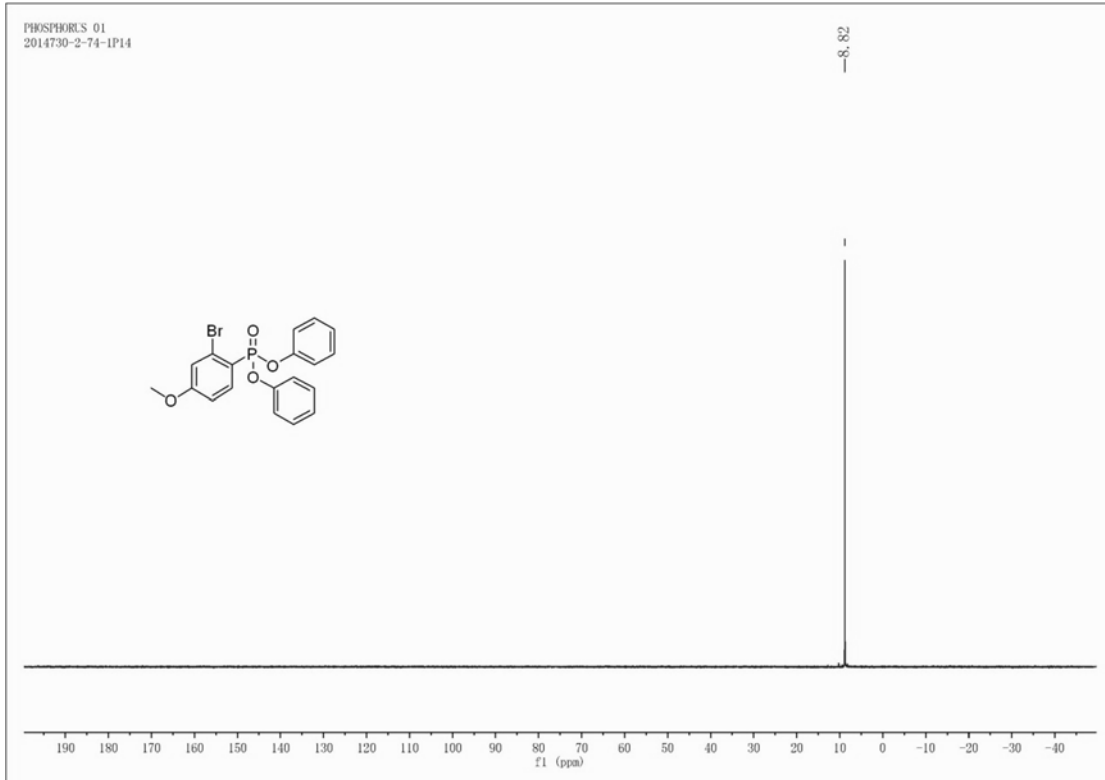



PHOSPHORUS\_01  
2014730-3-13-2A7P

-8.13

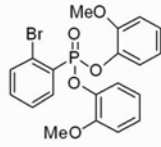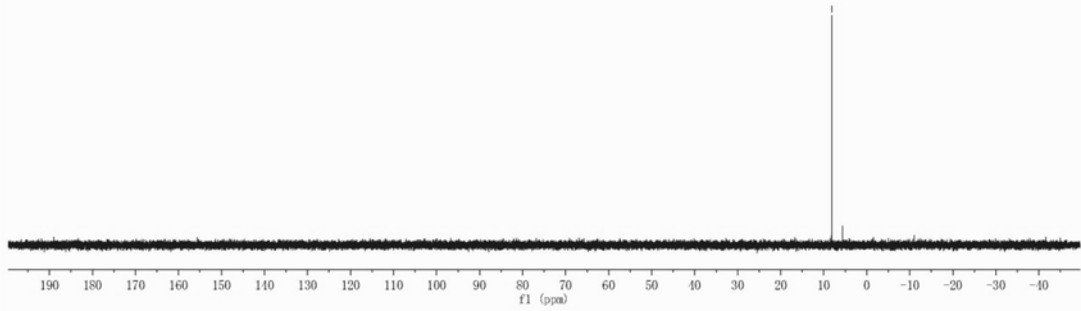

2014730-2-74-1a16 pslabel 01  
Gradient Shimming

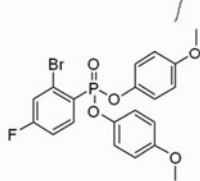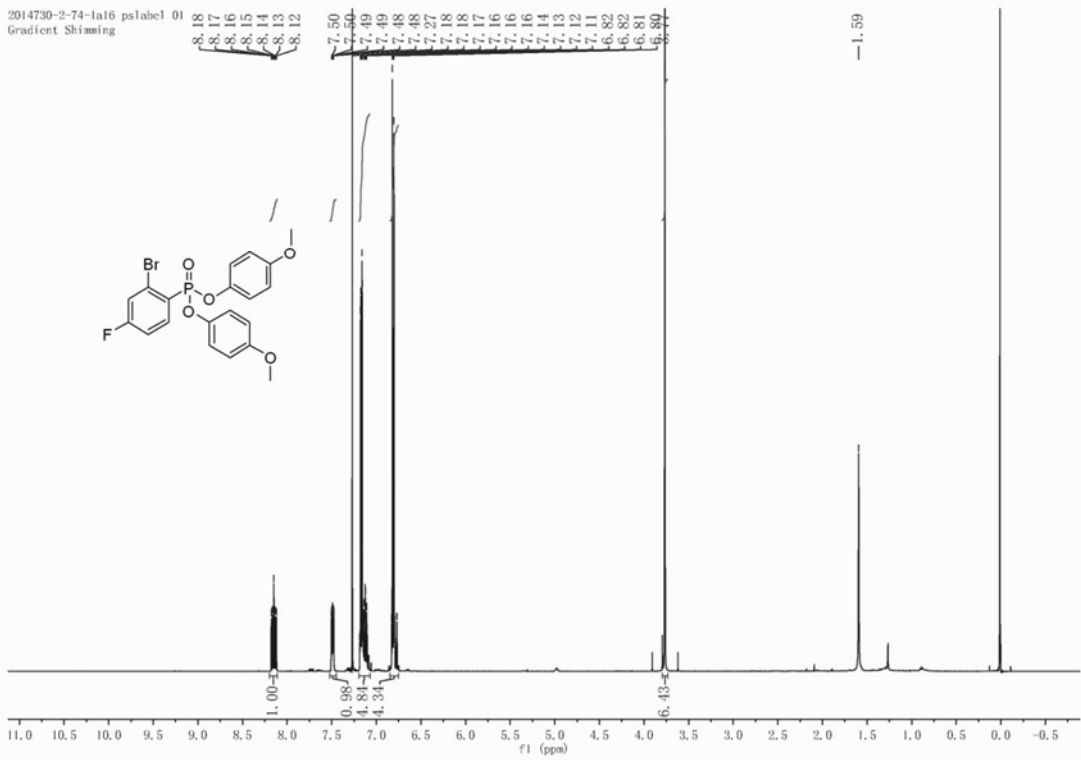



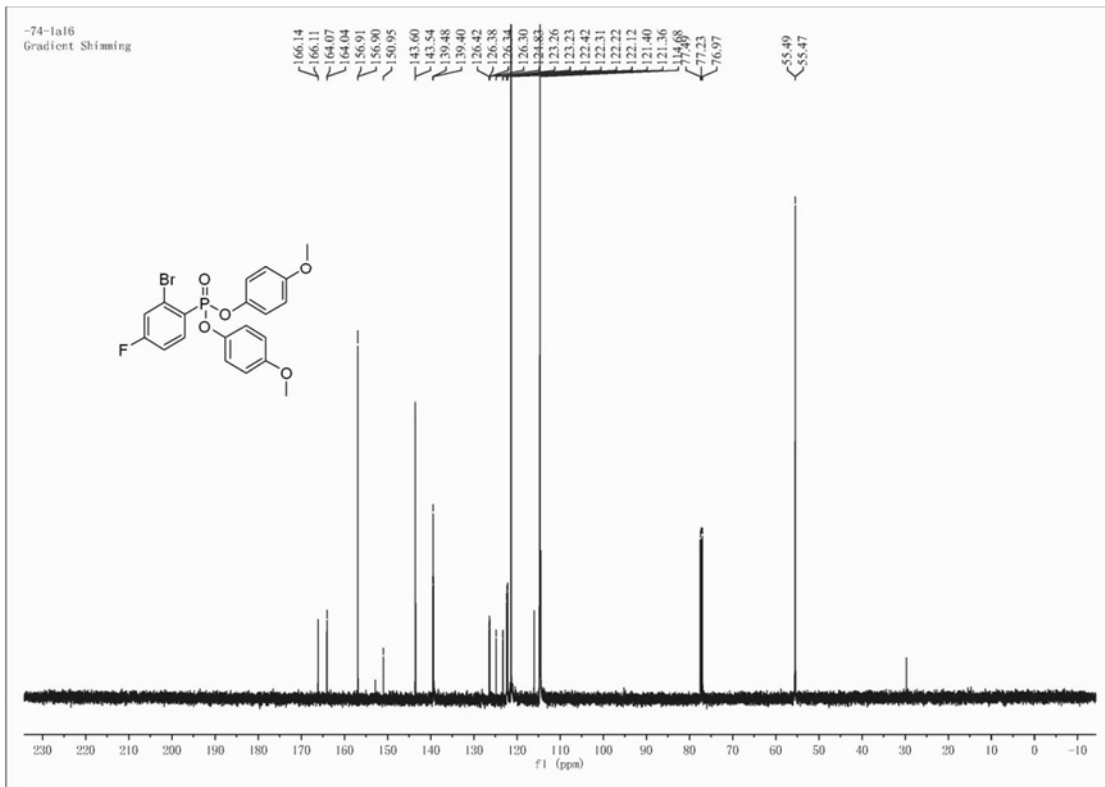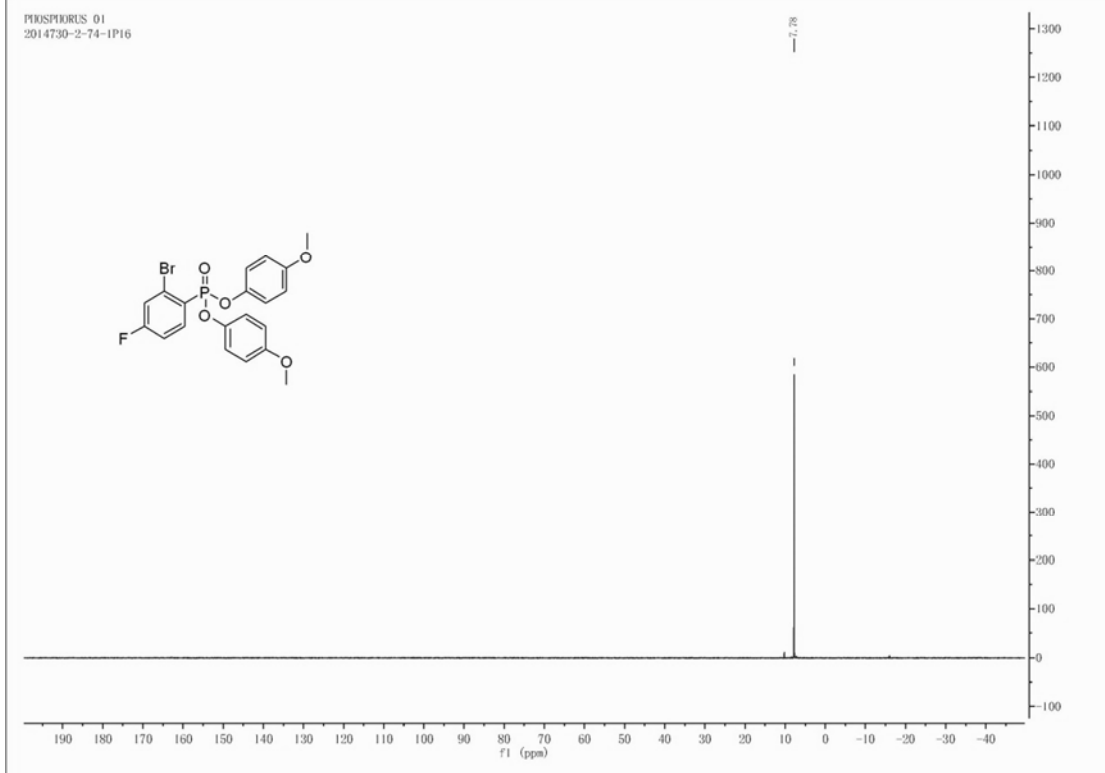

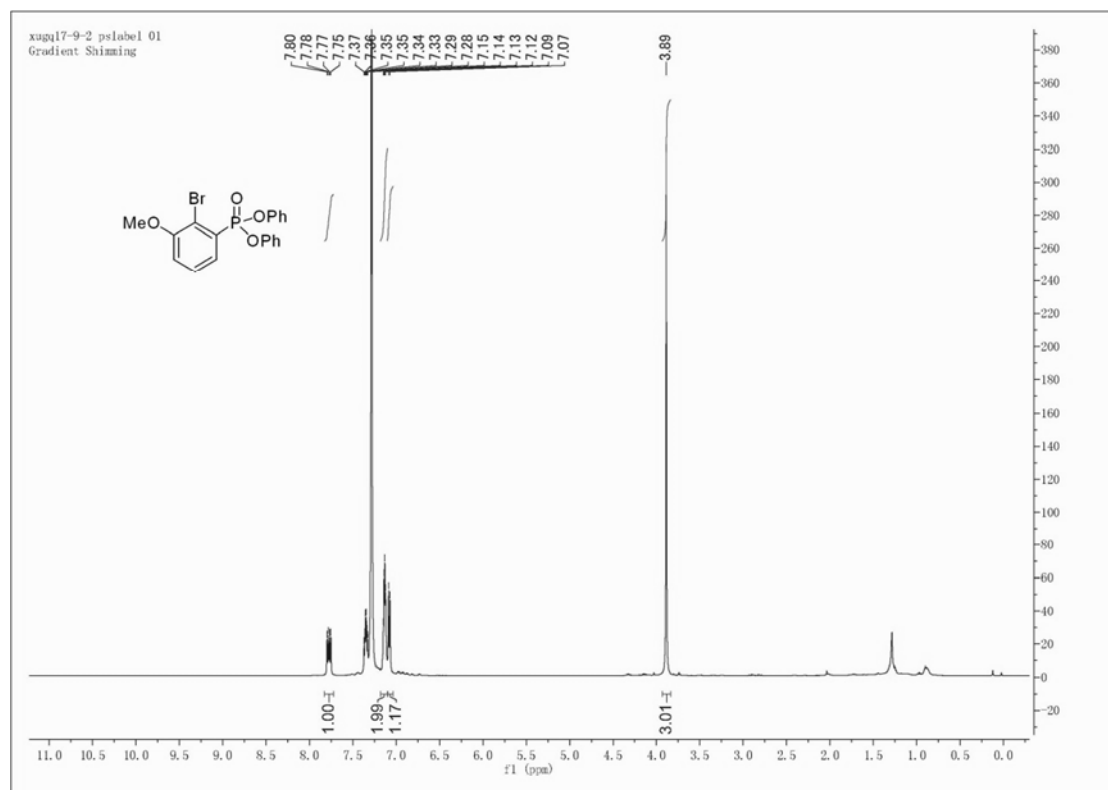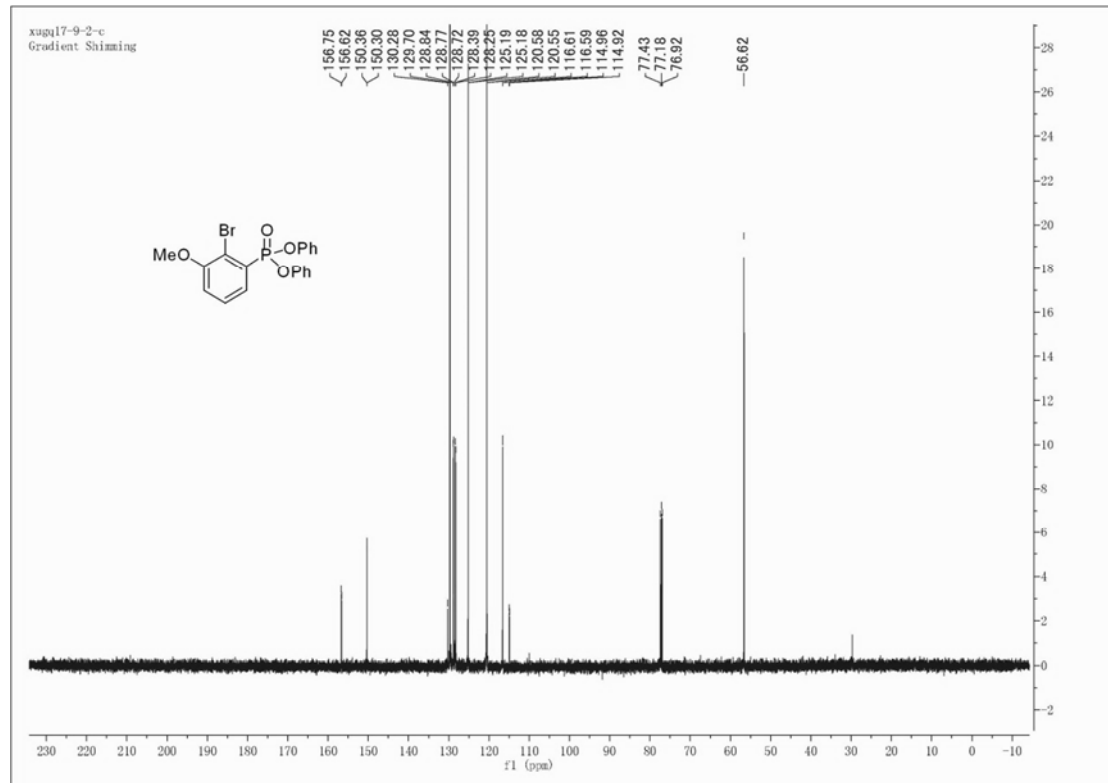



2014730-74-1a11  
Gradient Shimming

160.82  
158.88  
145.97  
145.94  
145.91  
145.88  
137.45  
137.38  
137.34  
137.26  
134.92  
134.83  
134.74  
134.68  
134.61  
125.19  
122.07  
121.88  
116.45  
116.42  
116.25  
116.24  
77.15  
76.90

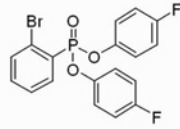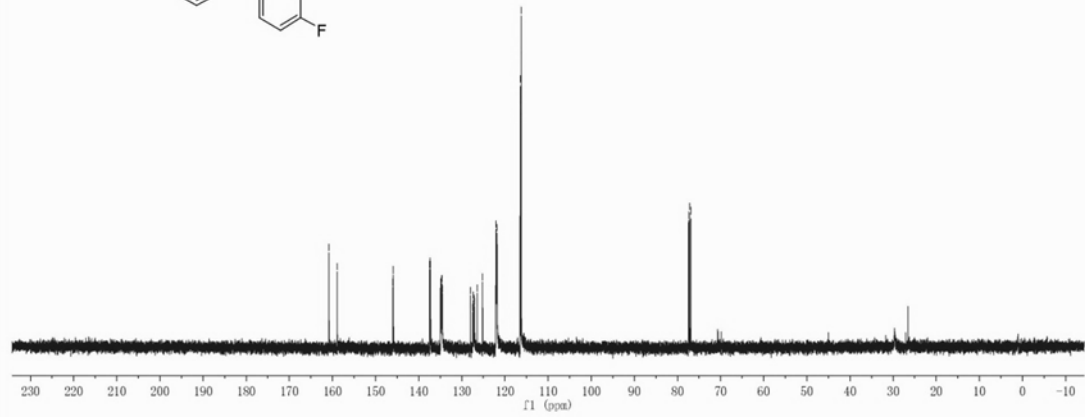

PHOSPHORUS 01  
lest001

77.15

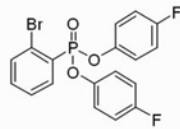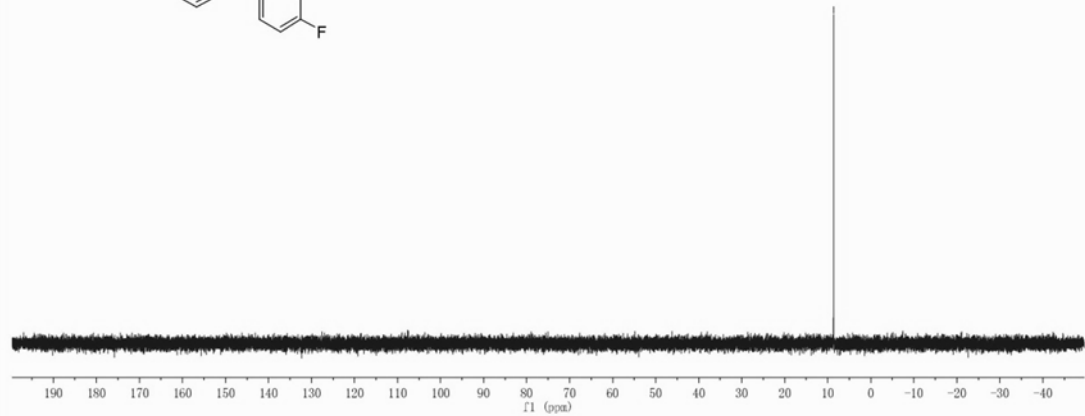

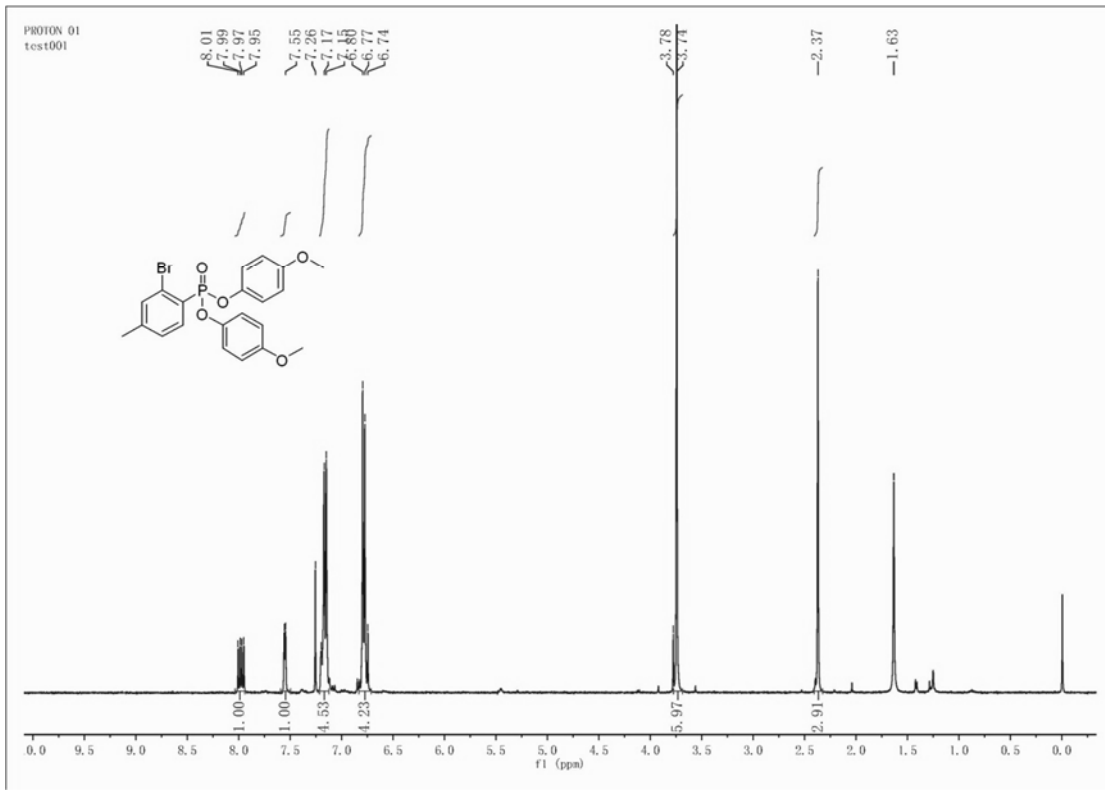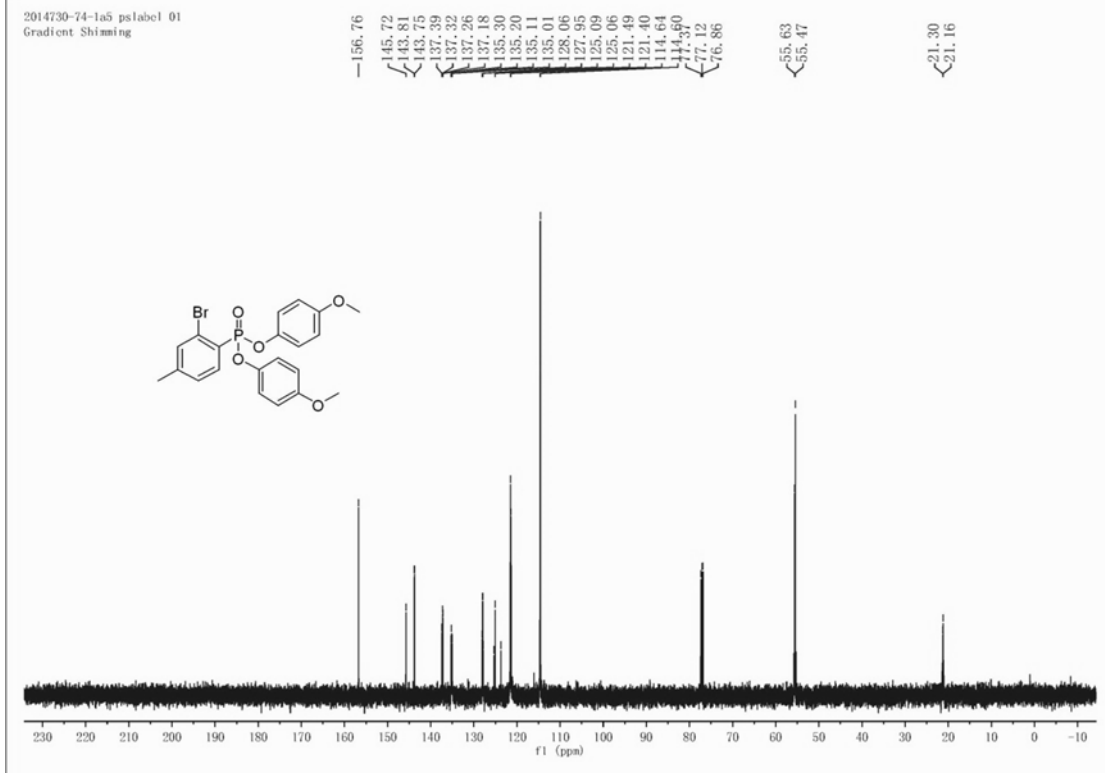

PHOSPHORUS 01  
2014730-2-74-1P5

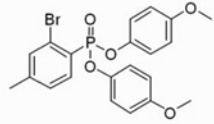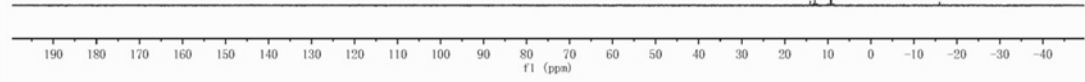

-24-la pslabel 01  
Gradient Shimming

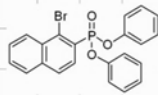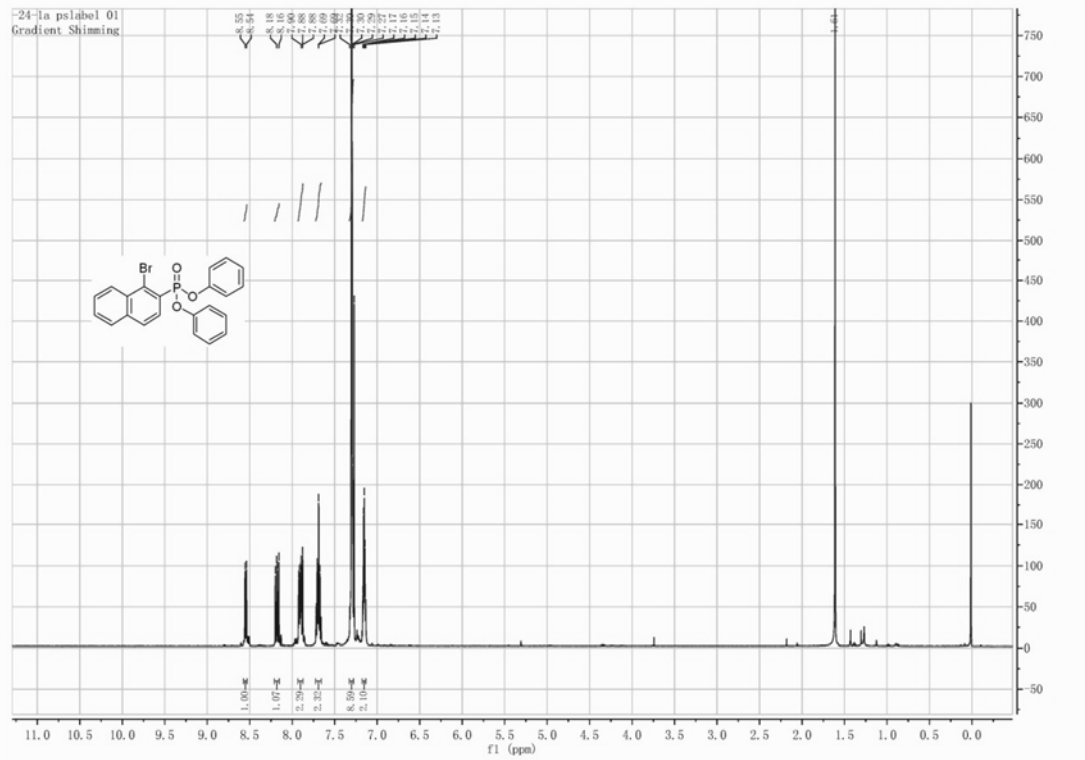

PHOSPHORUS 01  
2014730-2-74-1P8

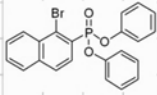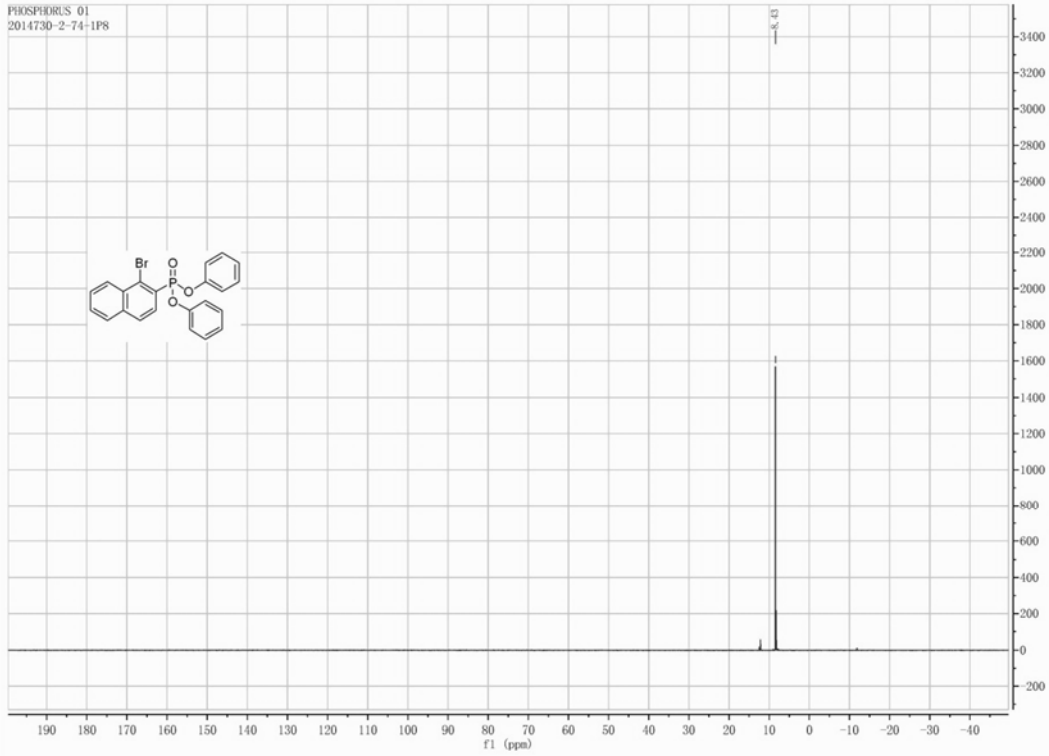

-20-2re pslahk06  
Gradient Shing

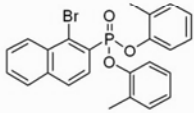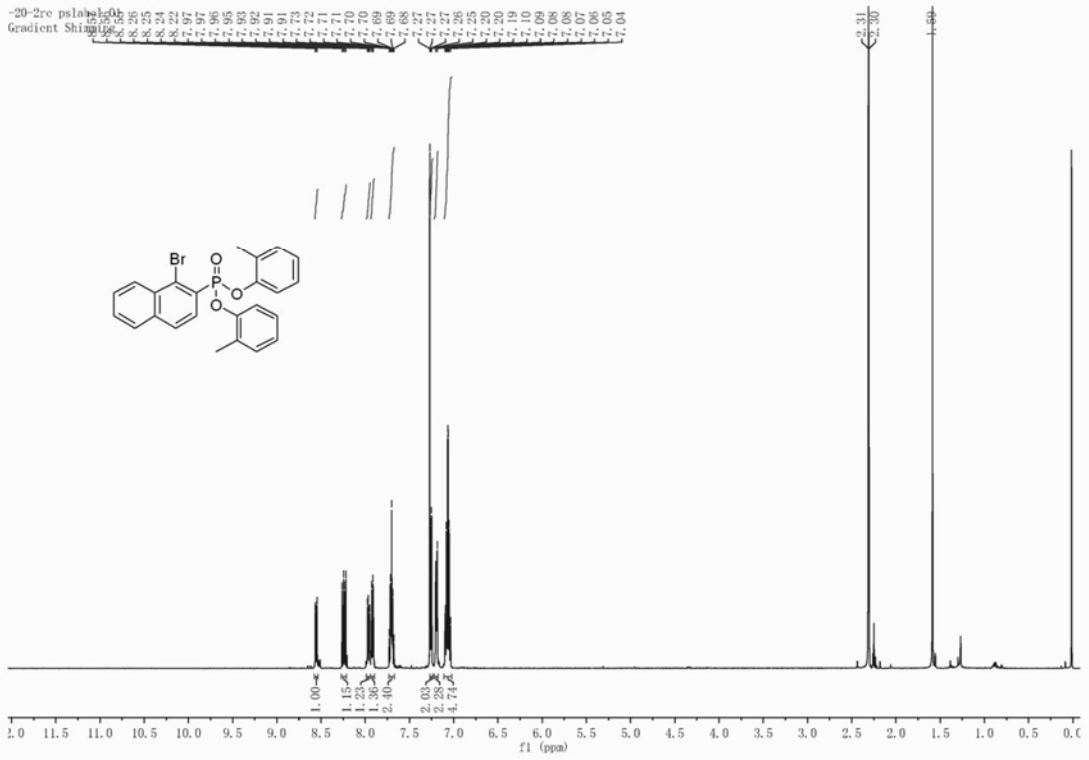

2014730-74-1a6 pslabel 01  
Gradient Shimming

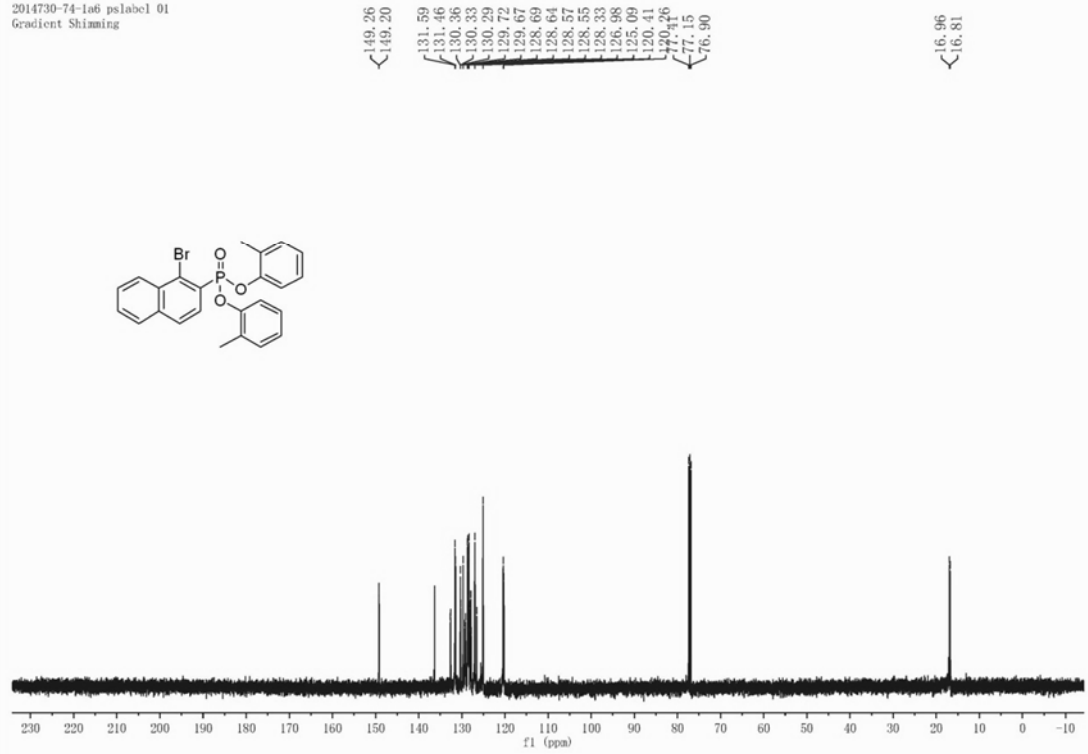

PHOSPHORUS 01  
2014730-2-74-1P6

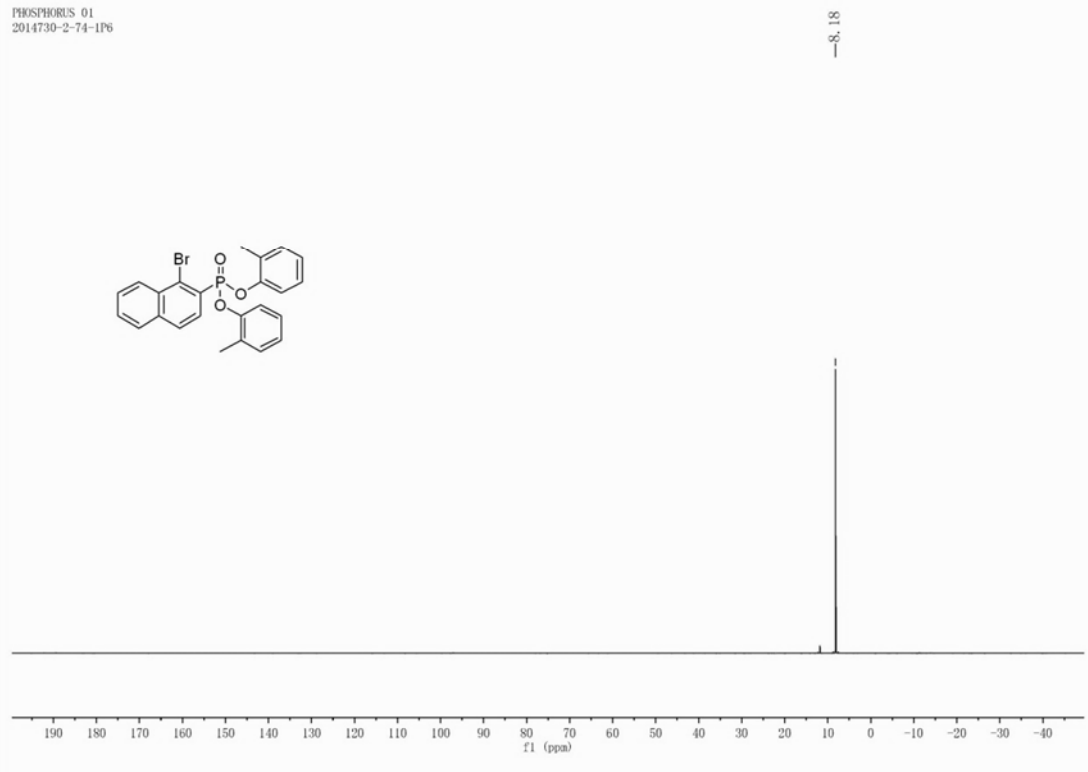



2014730-11-2-h

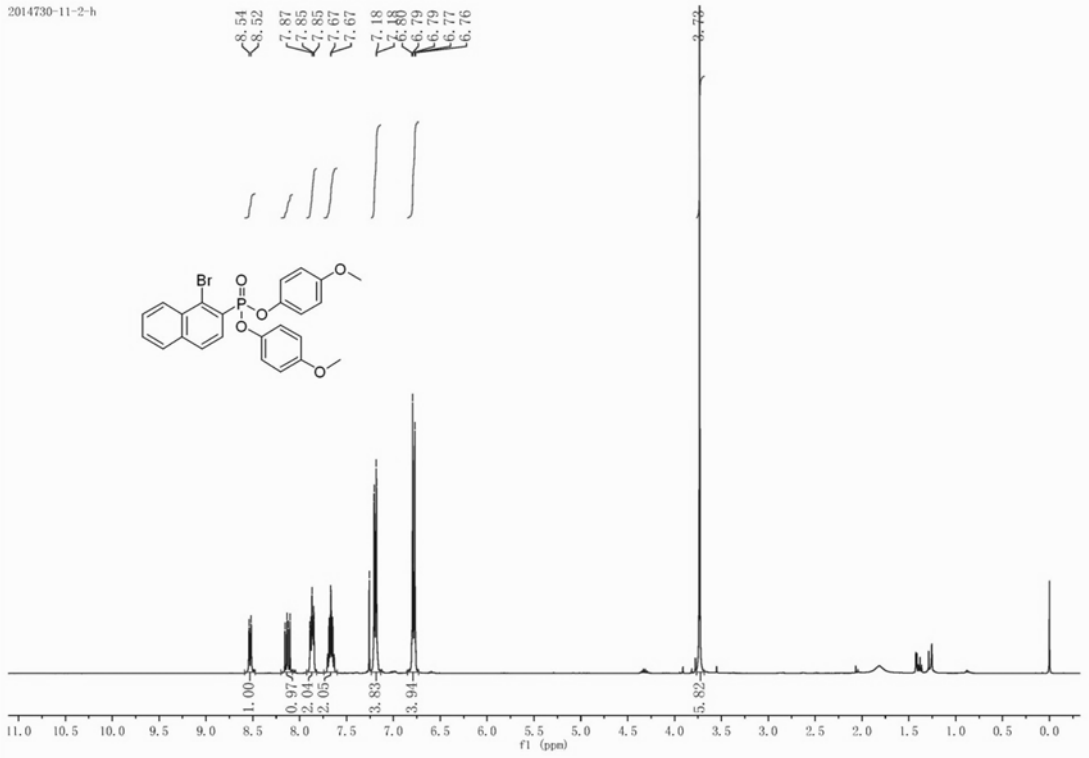

2014730-74-1a3\_pslabel\_01  
Gradient Shimming

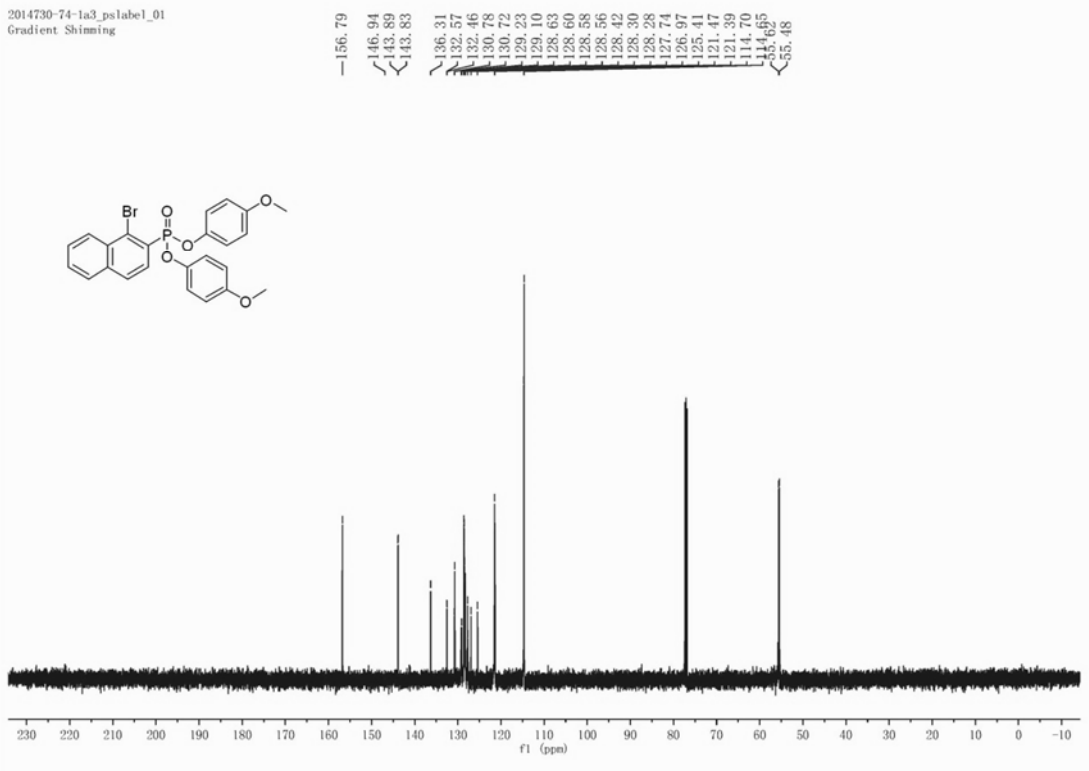

PHOSPHORUS\_01  
2014730-2-74-1P3

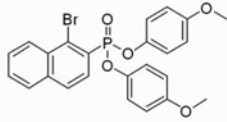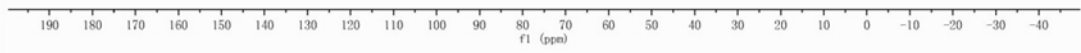

8.54, 8.53, 8.52, 8.51, 8.50, 8.49, 8.48, 8.47, 8.46, 8.45, 8.44, 8.43, 8.42, 8.41, 8.40, 8.39, 8.38, 8.37, 8.36, 8.35, 8.34, 8.33, 8.32, 8.31, 8.30, 8.29, 8.28, 8.27, 8.26, 8.25, 8.24, 8.23, 8.22, 8.21, 8.20, 8.19, 8.18, 8.17, 8.16, 8.15, 8.14, 8.13, 8.12, 8.11, 8.10, 8.09, 8.08, 8.07, 8.06, 8.05, 8.04, 8.03, 8.02, 8.01, 8.00, 7.99, 7.98, 7.97, 7.96, 7.95, 7.94, 7.93, 7.92, 7.91, 7.90, 7.89, 7.88, 7.87, 7.86, 7.85, 7.84, 7.83, 7.82, 7.81, 7.80, 7.79, 7.78, 7.77, 7.76, 7.75, 7.74, 7.73, 7.72, 7.71, 7.70, 7.69, 7.68, 7.67, 7.66, 7.65, 7.64, 7.63, 7.62, 7.61, 7.60, 7.59, 7.58, 7.57, 7.56, 7.55, 7.54, 7.53, 7.52, 7.51, 7.50, 7.49, 7.48, 7.47, 7.46, 7.45, 7.44, 7.43, 7.42, 7.41, 7.40, 7.39, 7.38, 7.37, 7.36, 7.35, 7.34, 7.33, 7.32, 7.31, 7.30, 7.29, 7.28, 7.27

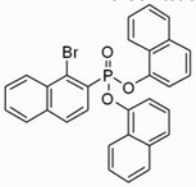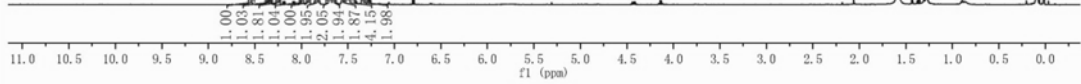



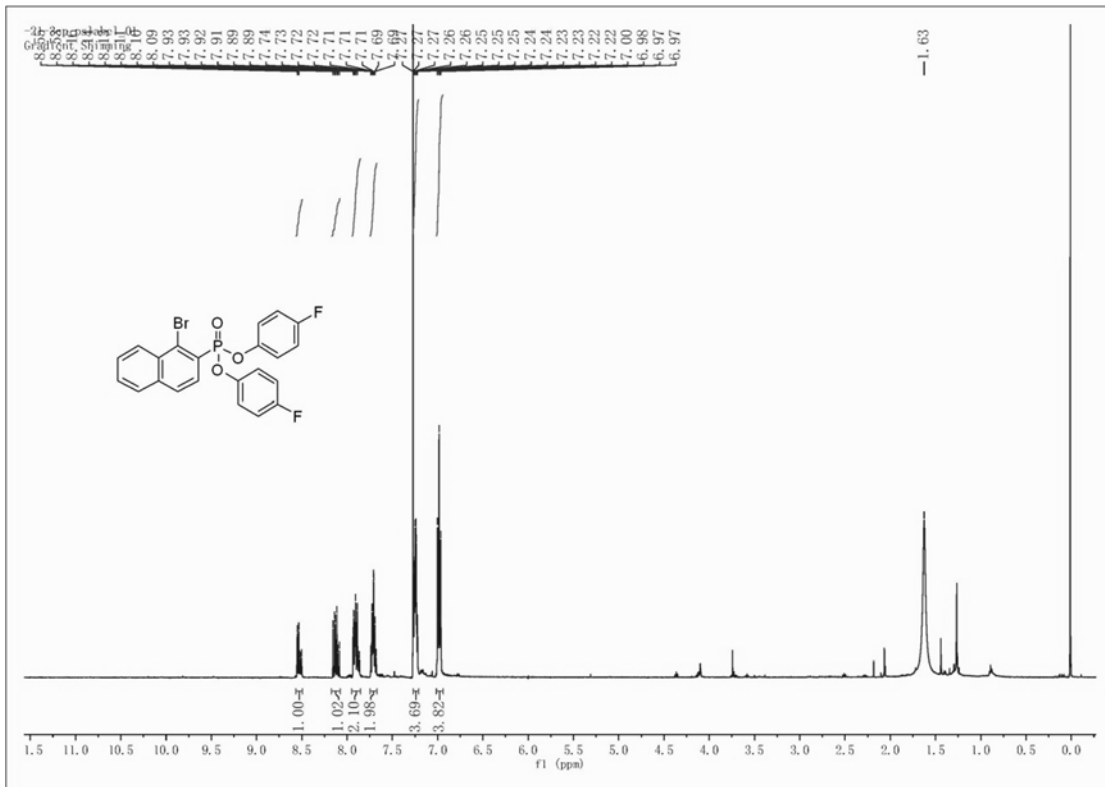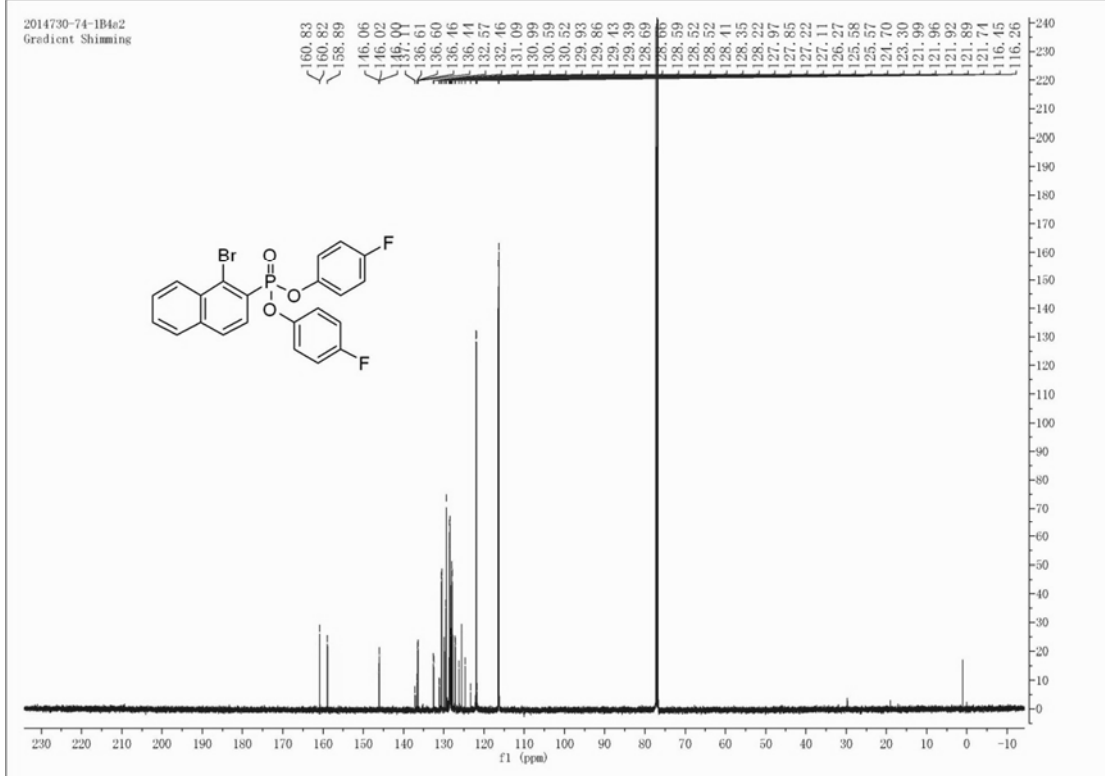

PHOSPHORUS\_01  
2014730-2-74-1P4

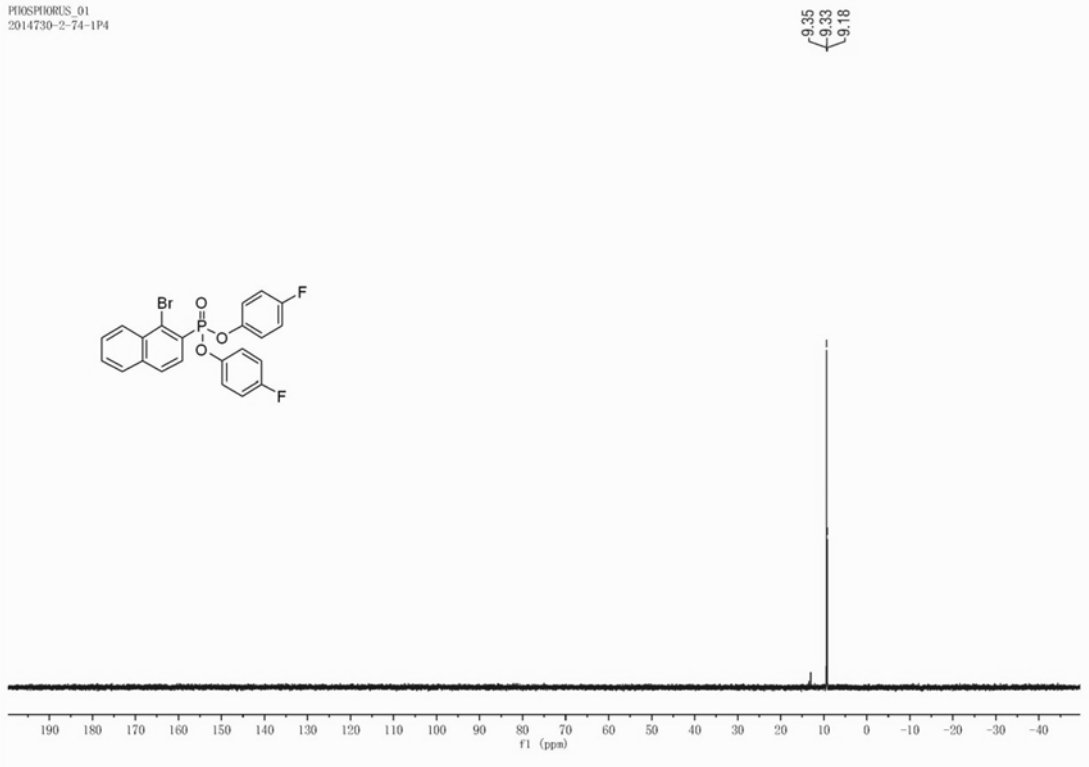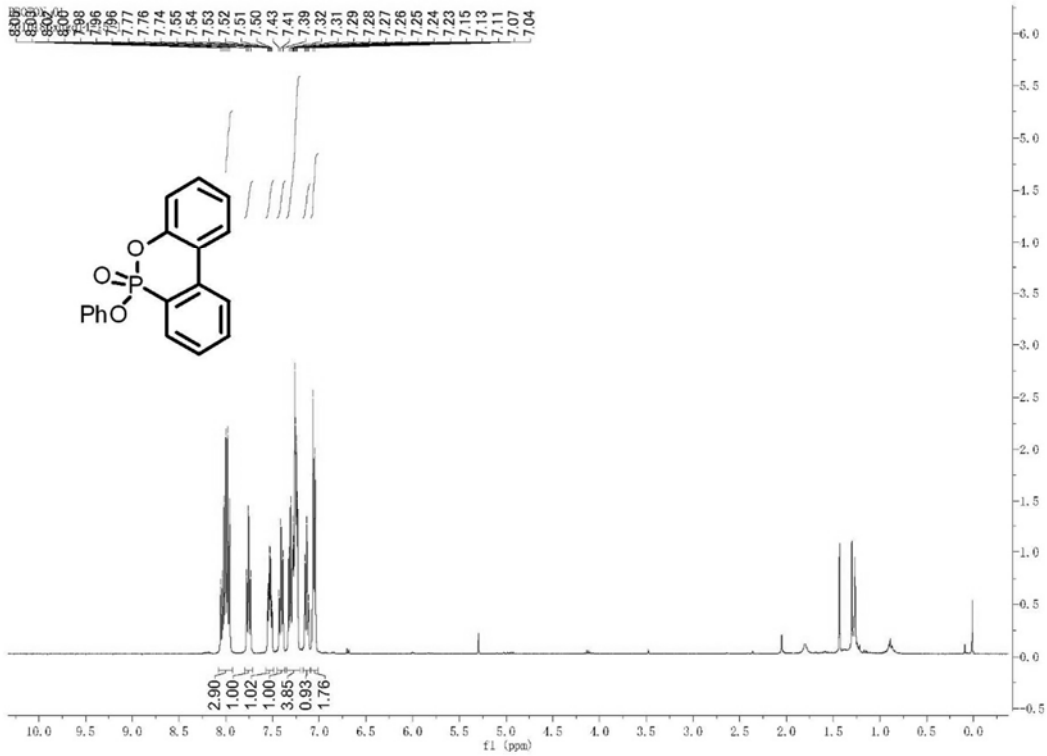

xxxx16-66-2  
2010186xxq16-66-2

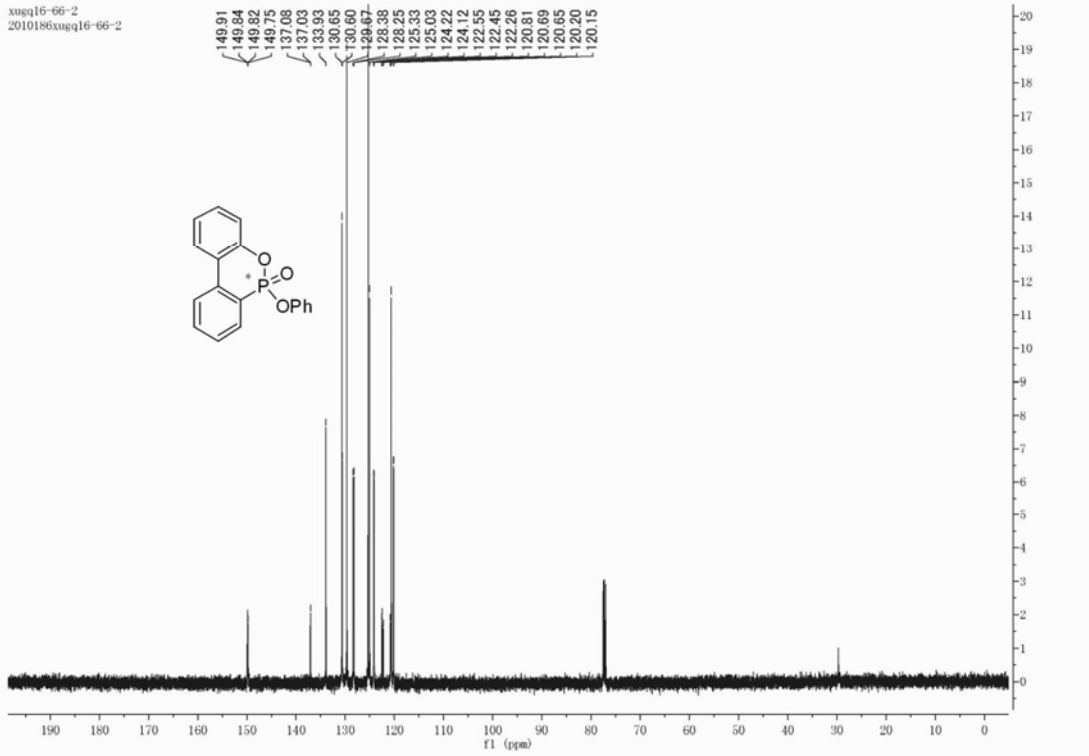

PHOSPHOSUS\_01  
2010186xxq14-15-1

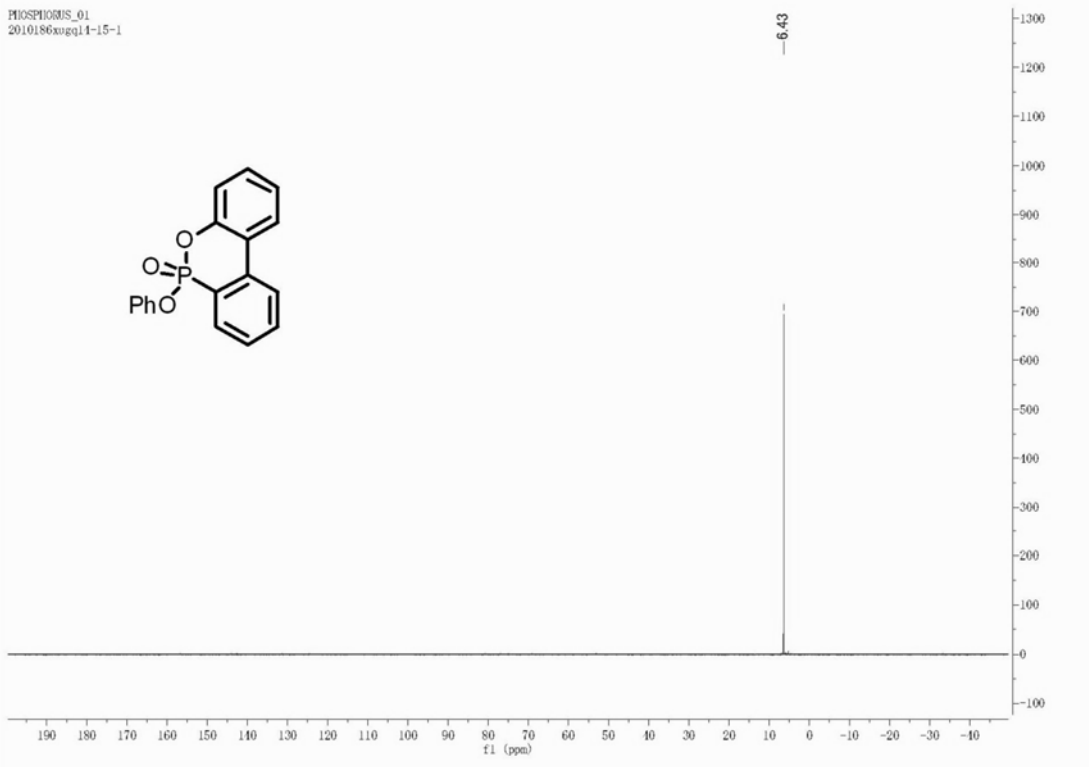

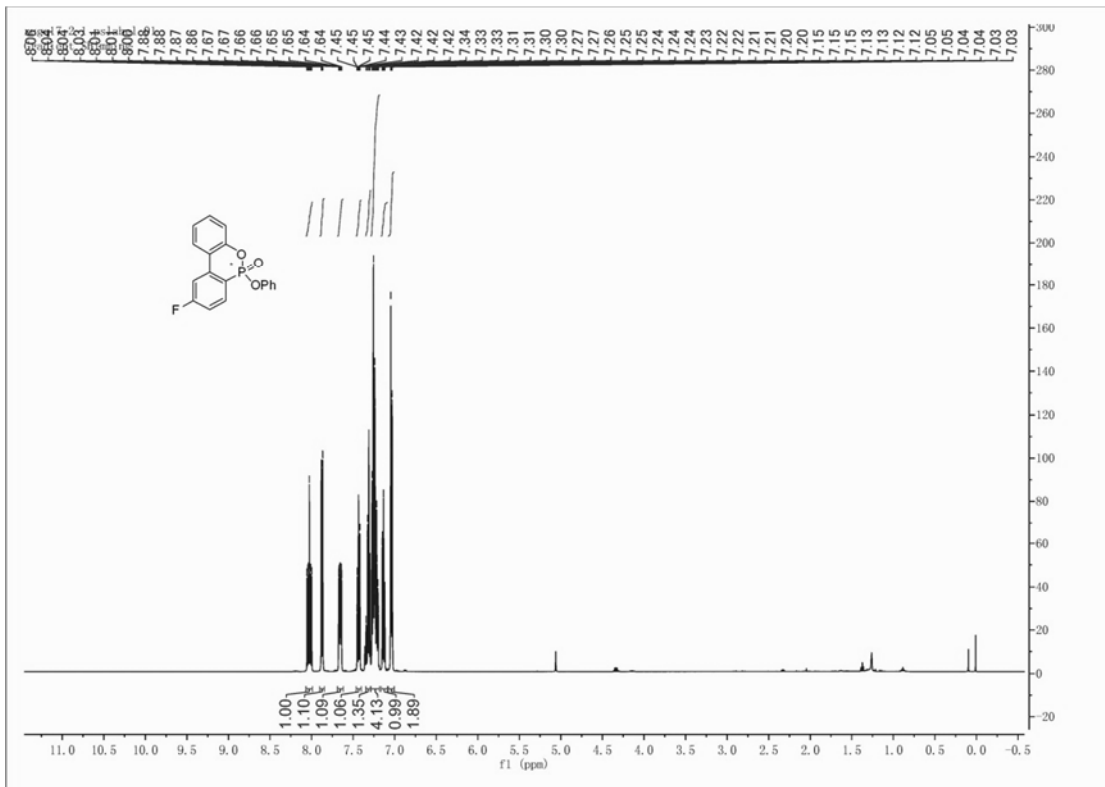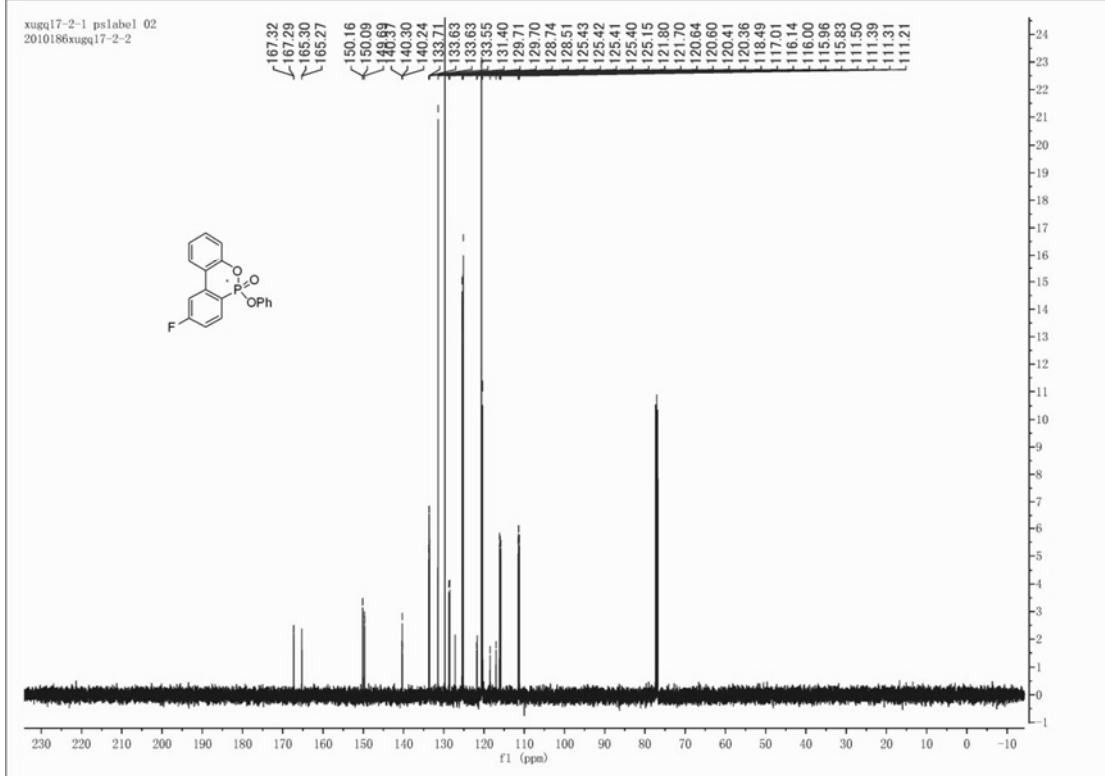

PHOSPHORUS 01  
2010186XUGQ17-2-1-P

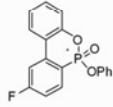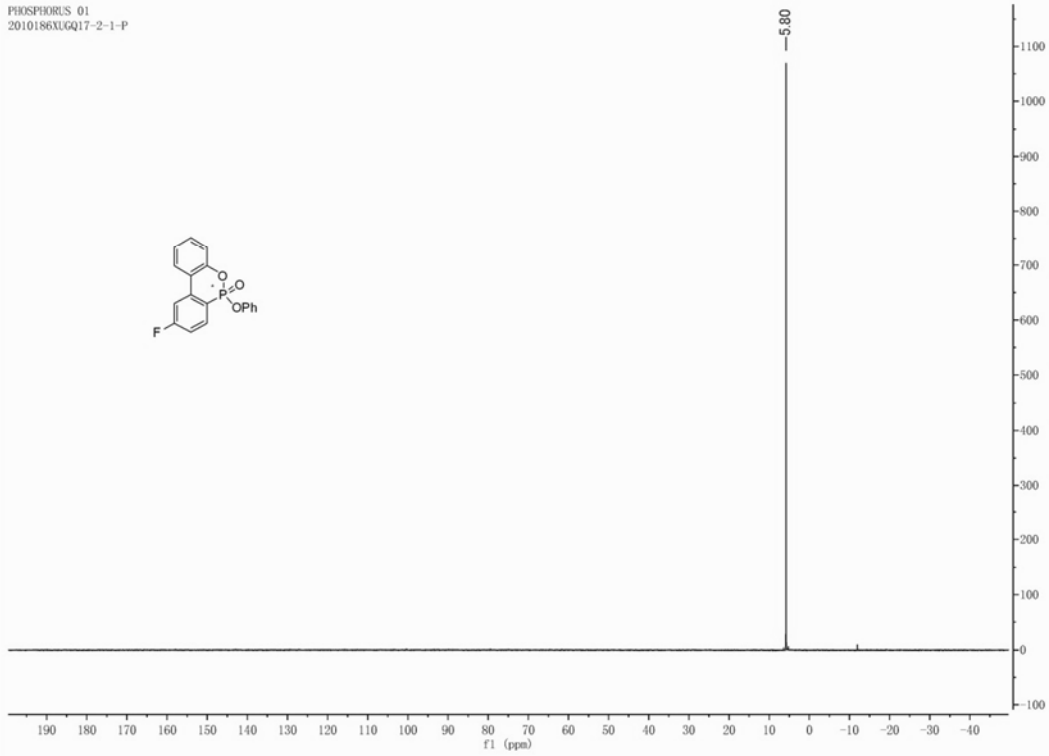

xugq17-2-6 pslabel  
Gradient Shimadzu

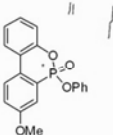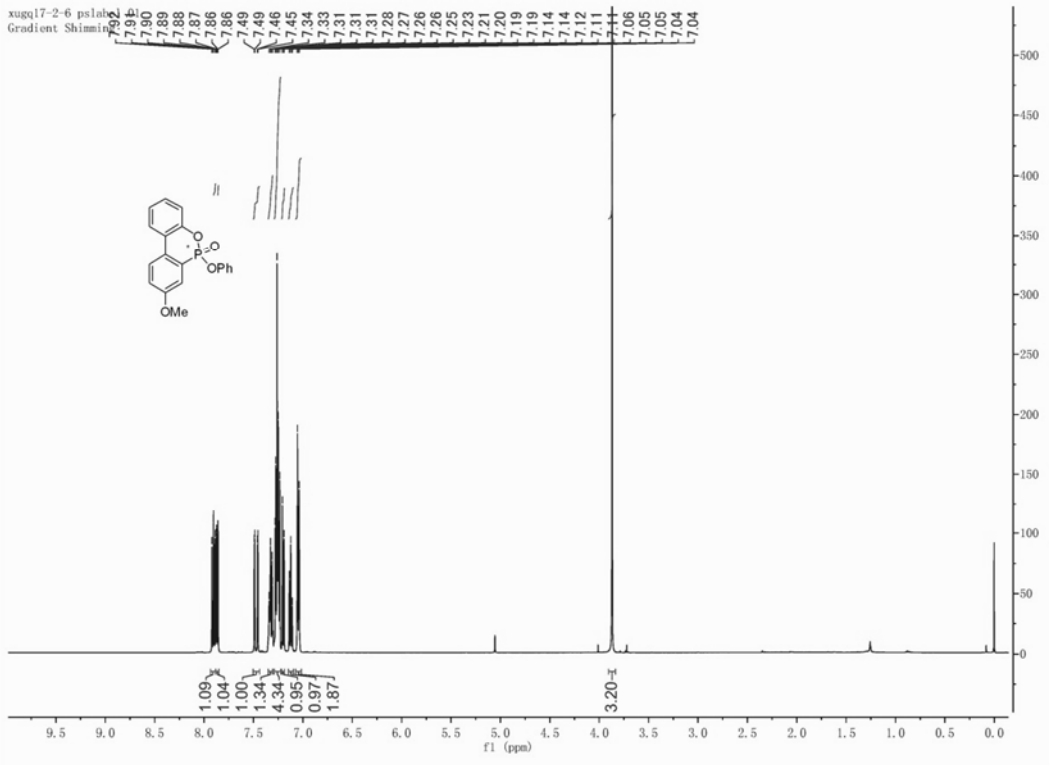



xugq17-2-6 pslabel 02  
2010186xugq17-2-6

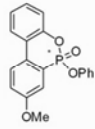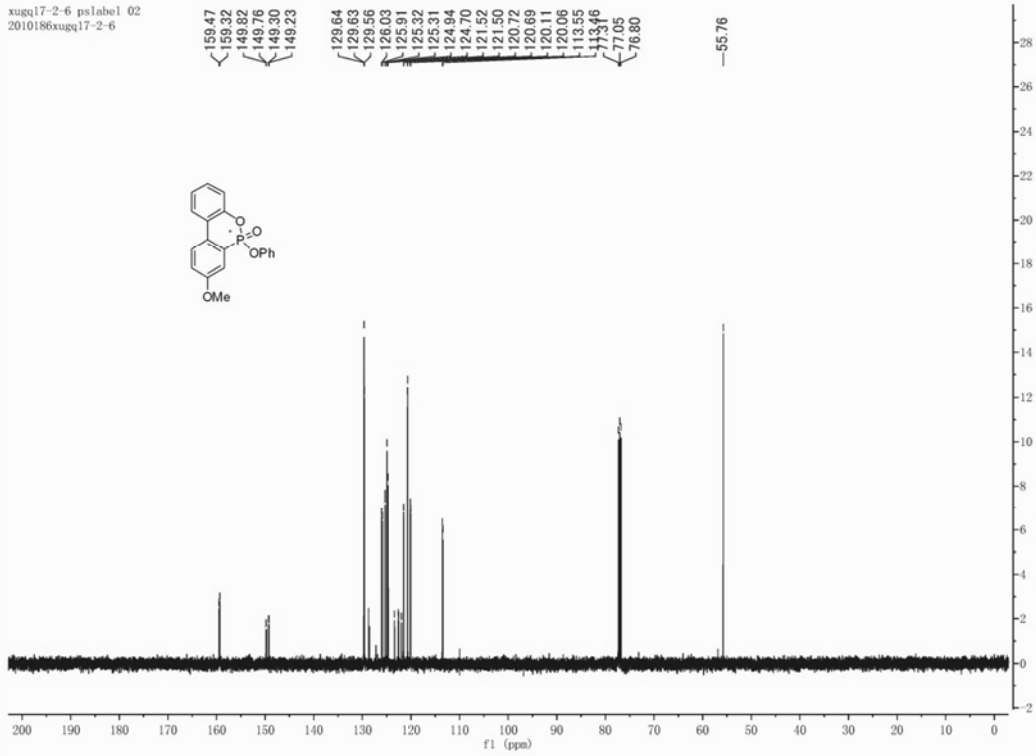

PHOSPHORUS 01  
2010186XUGQ16-60-6

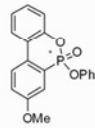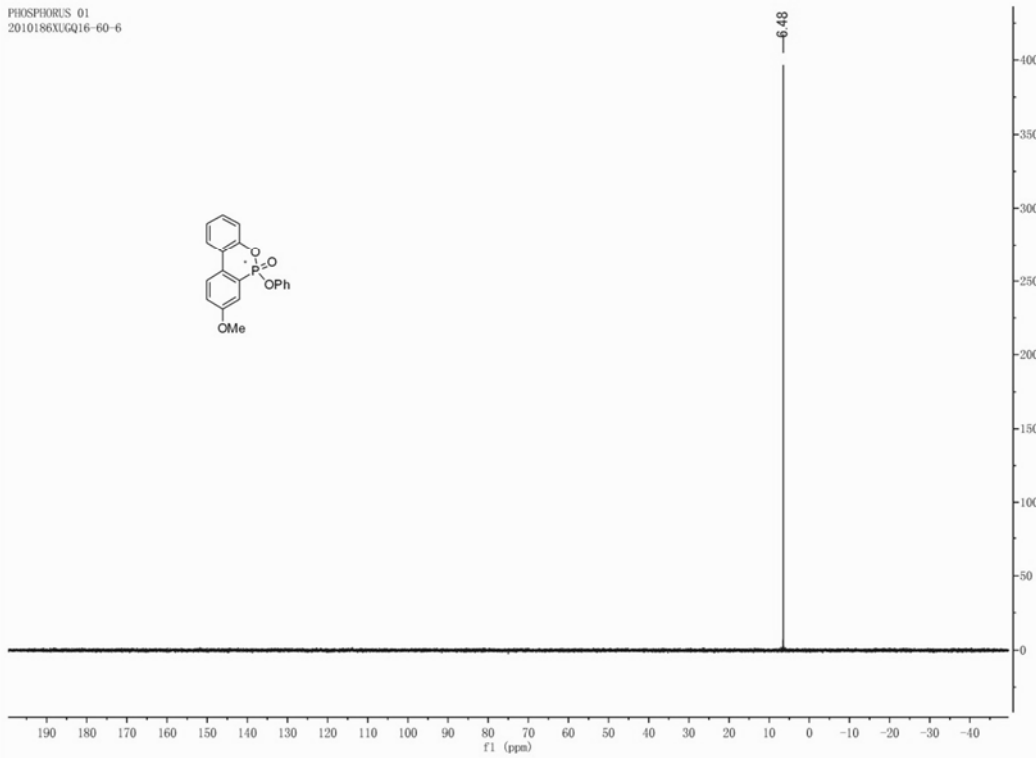

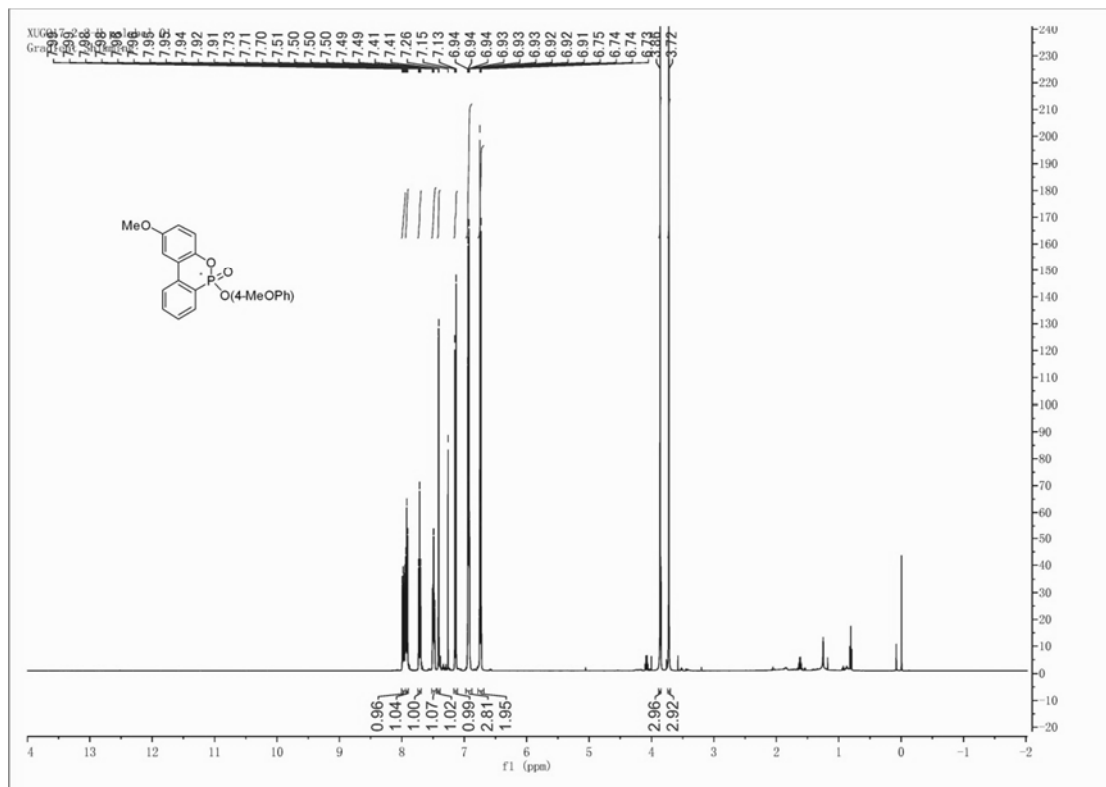

PHOSPHORUS 01  
2010186XUGQ17-2-2-P

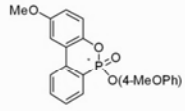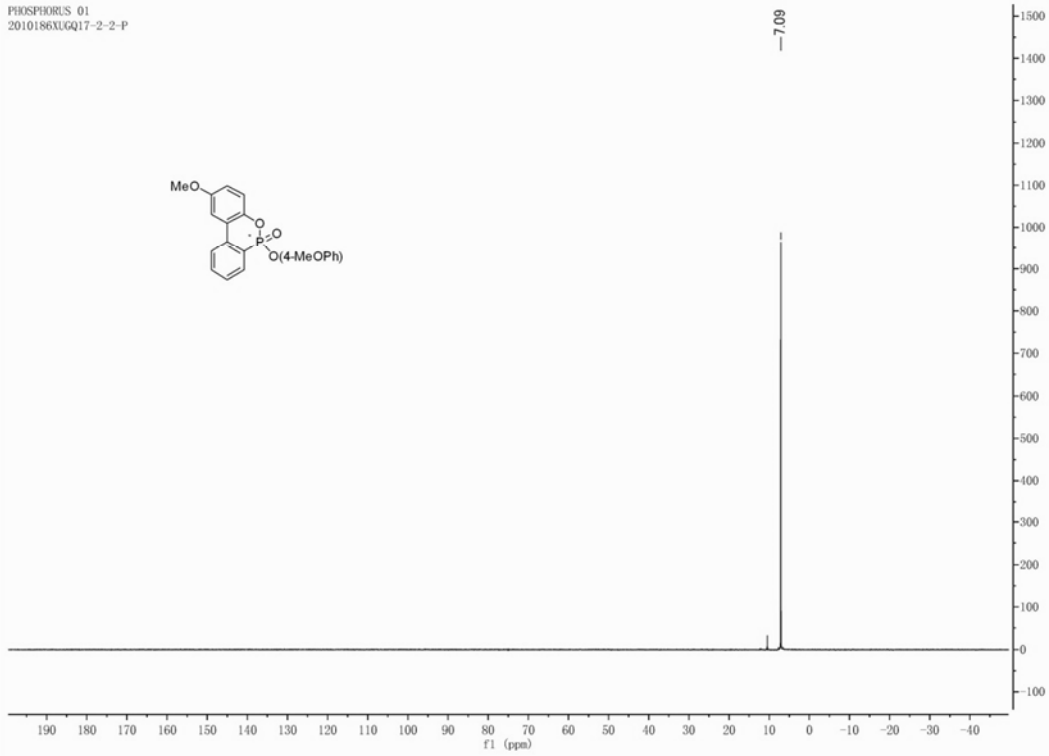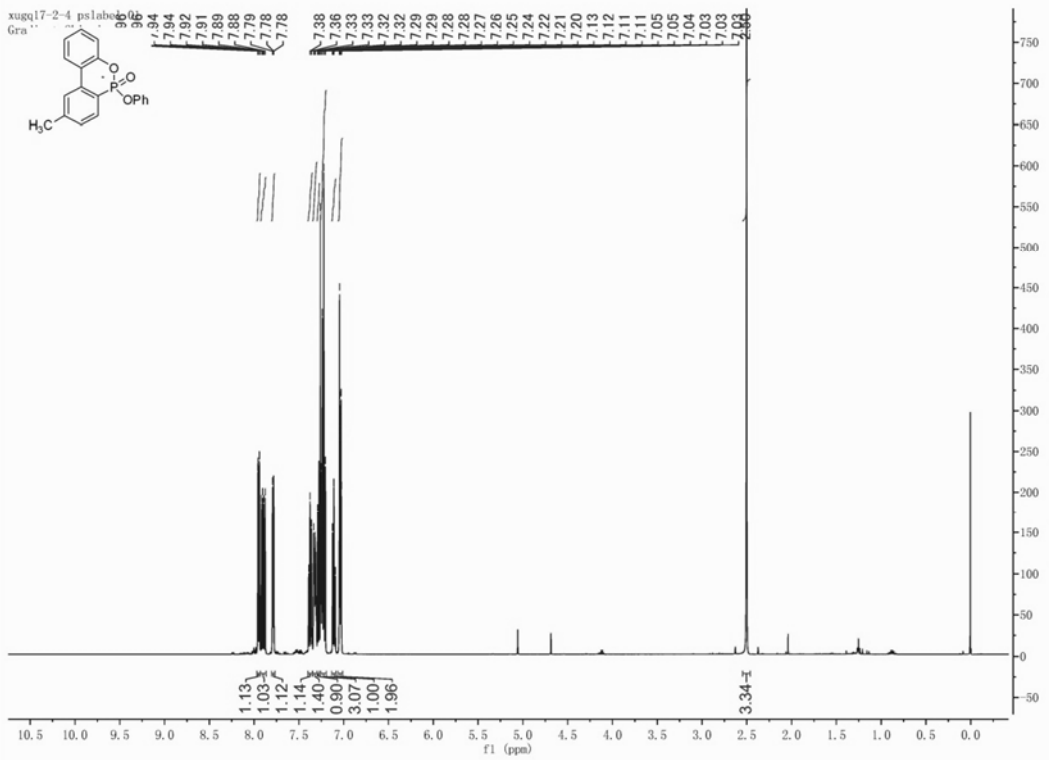

xugq17-2-4 pslabel 02  
2010186xugq17-2-4

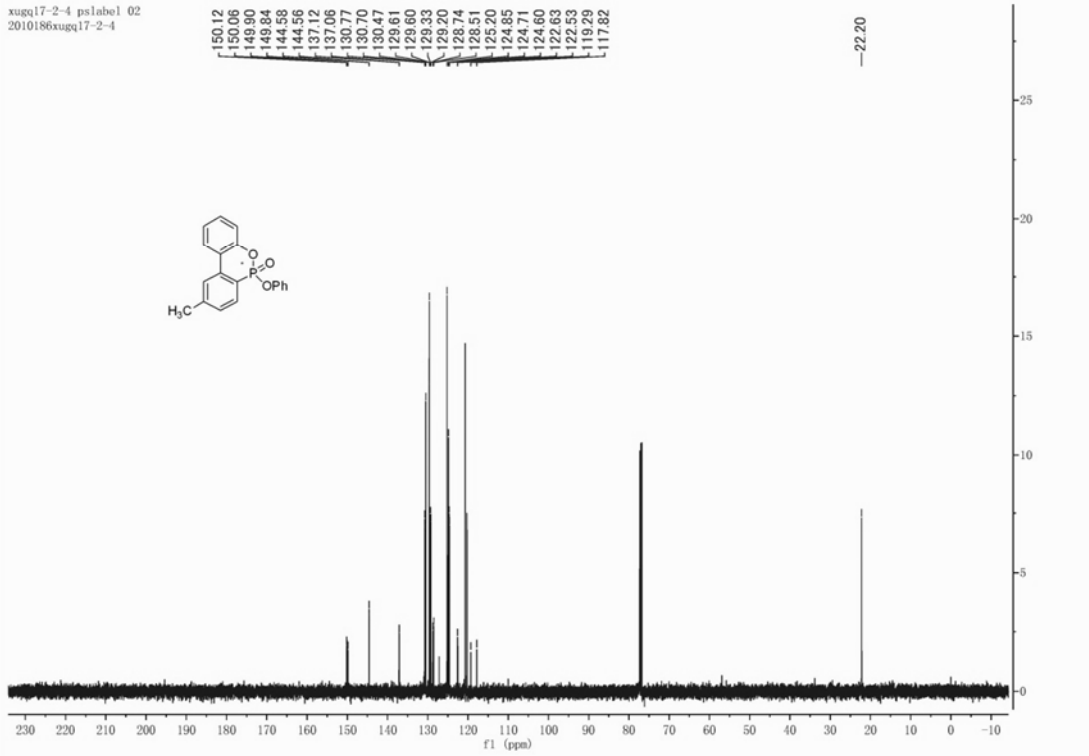

PHOSPHORUS 01  
201

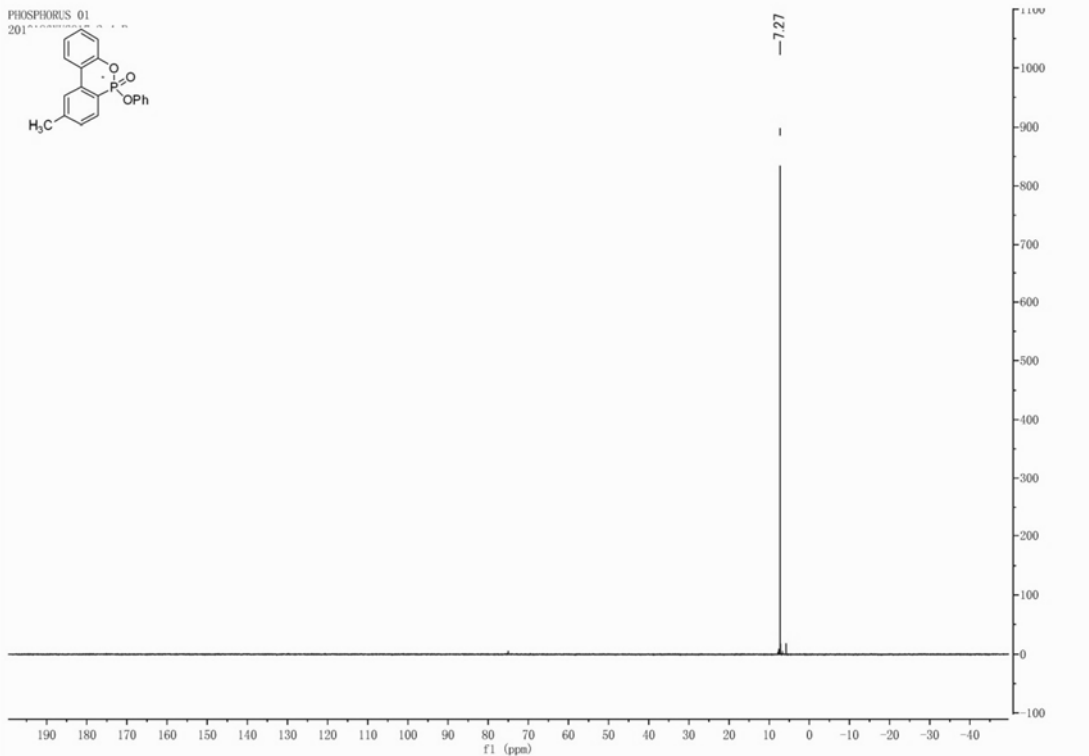

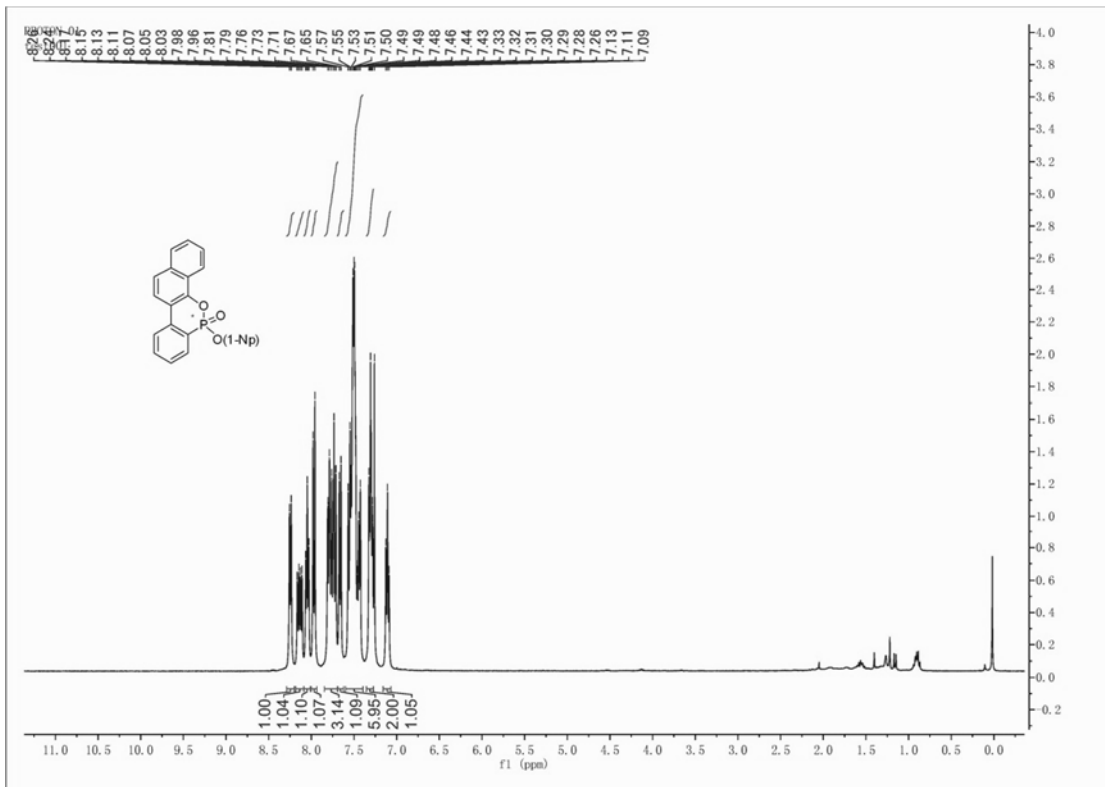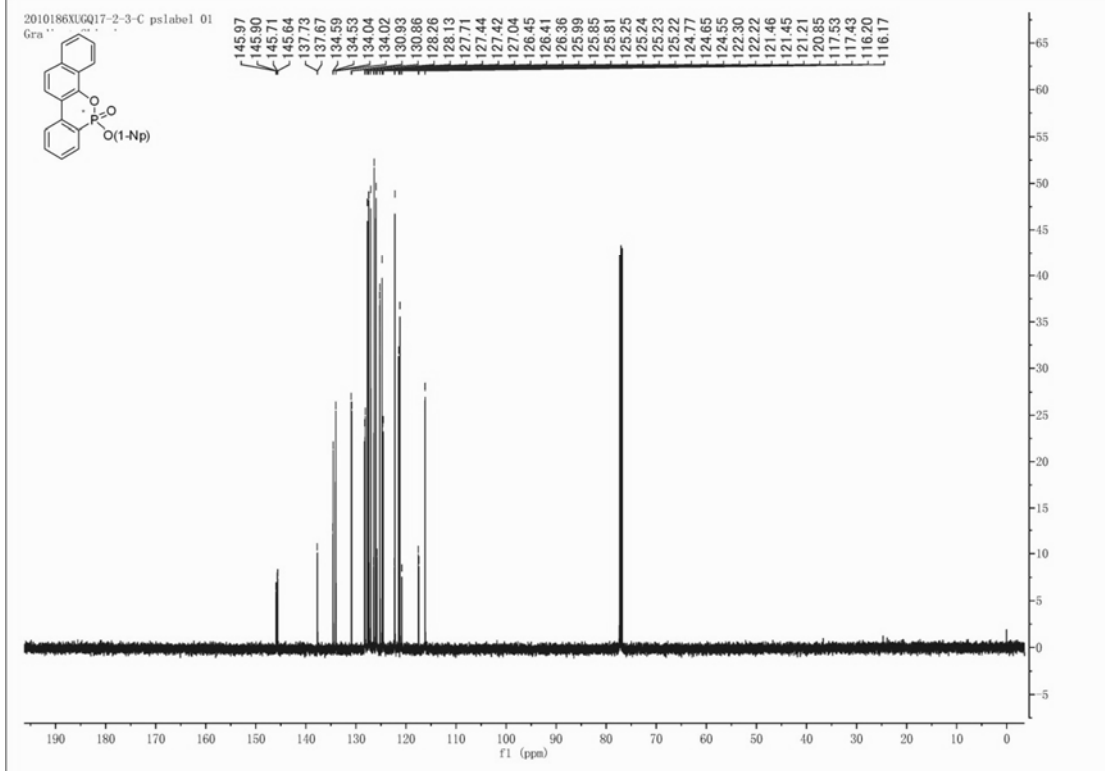

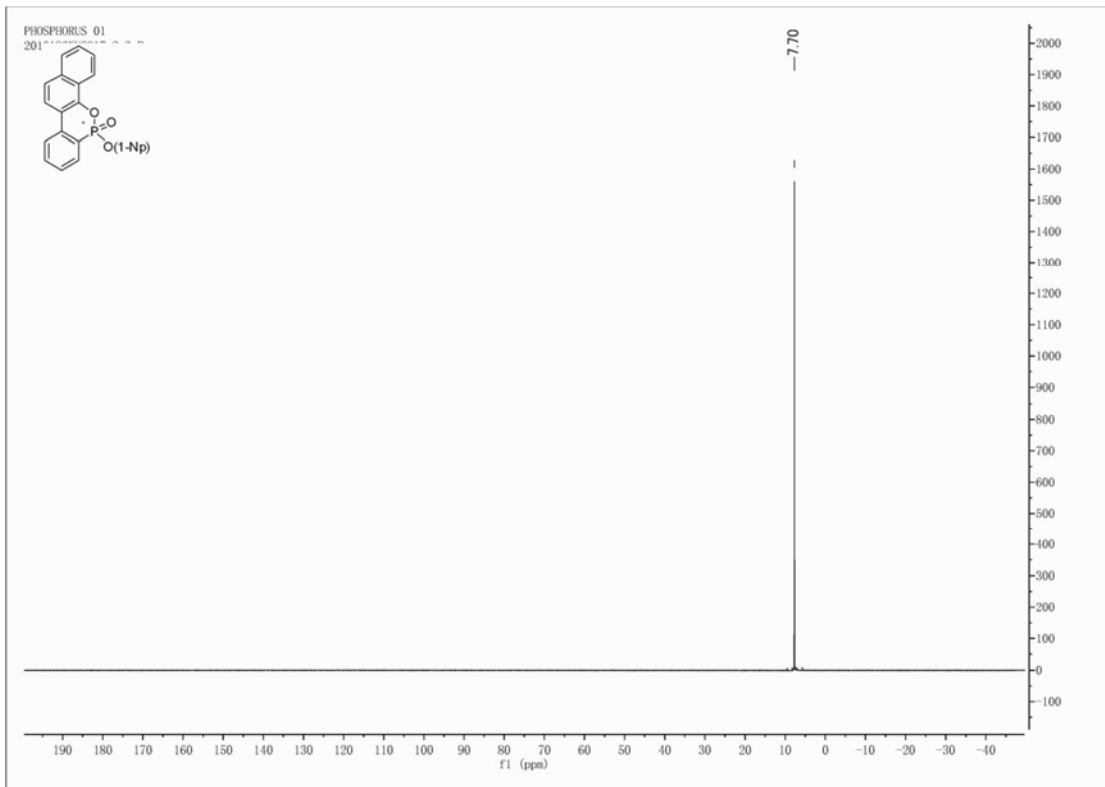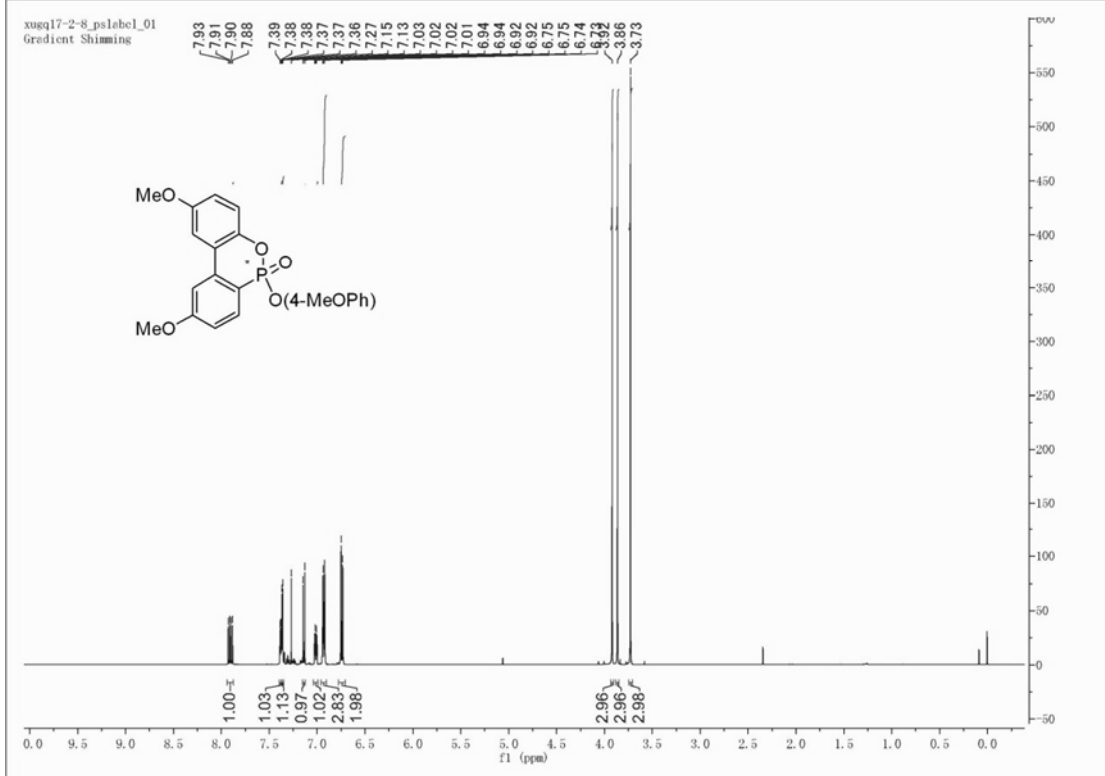

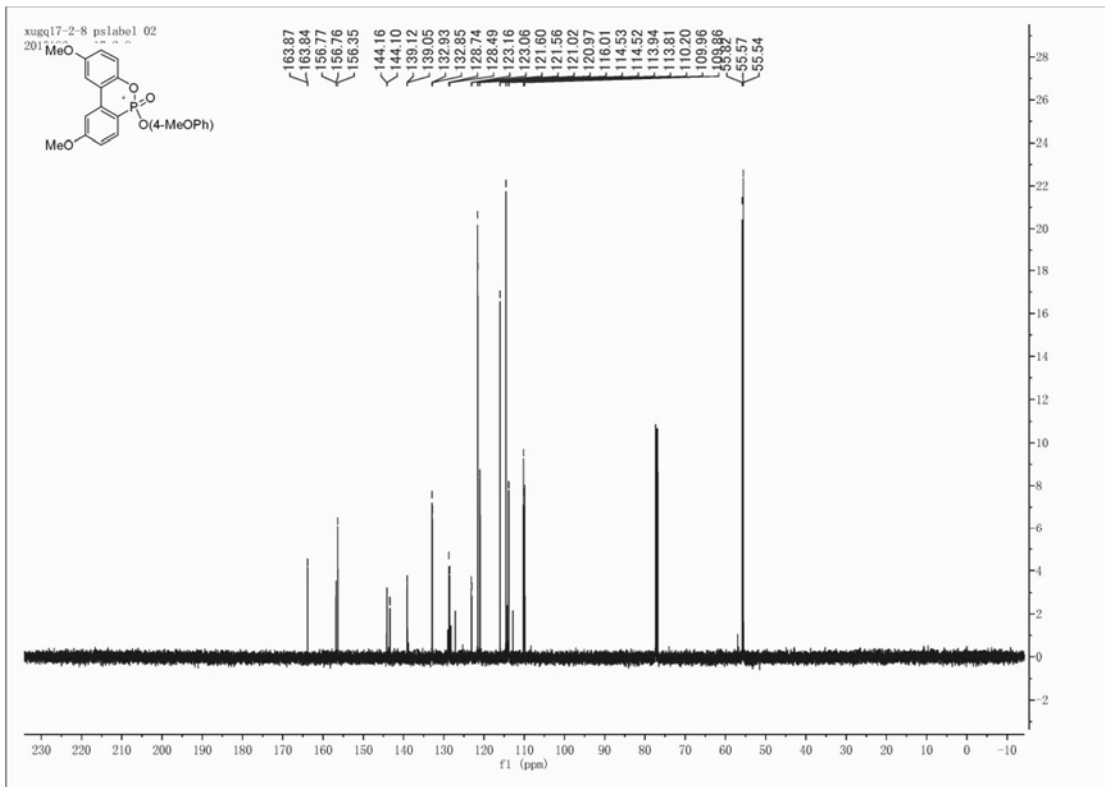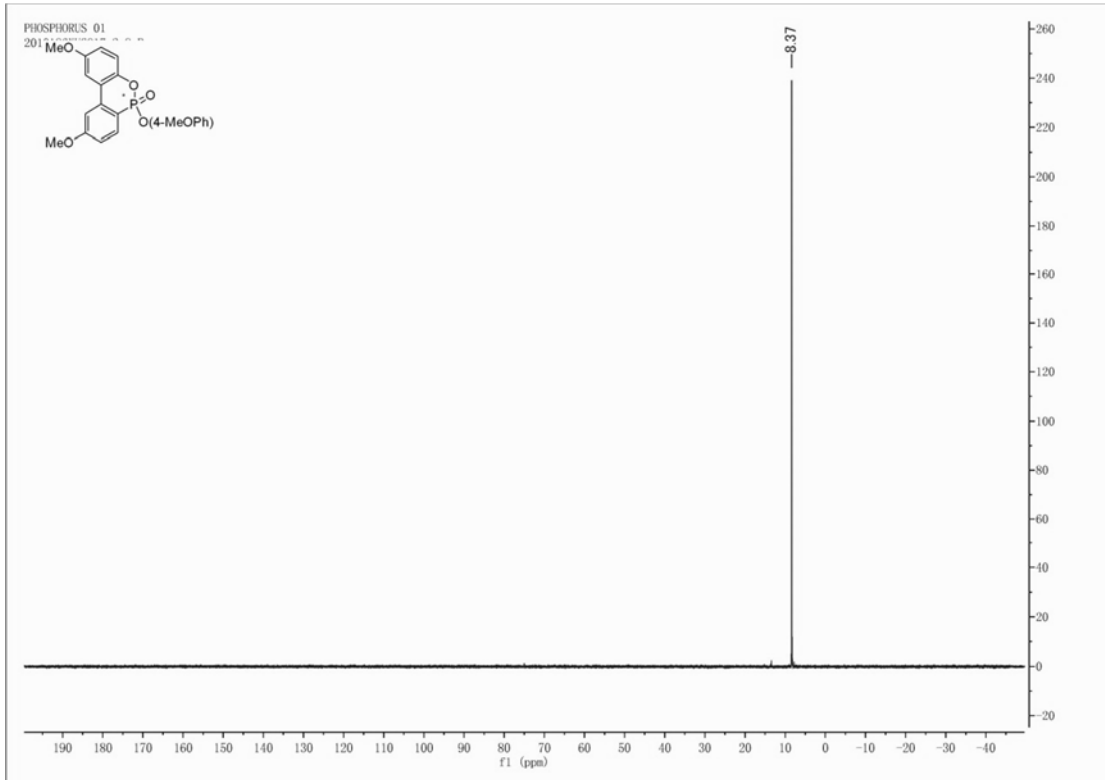

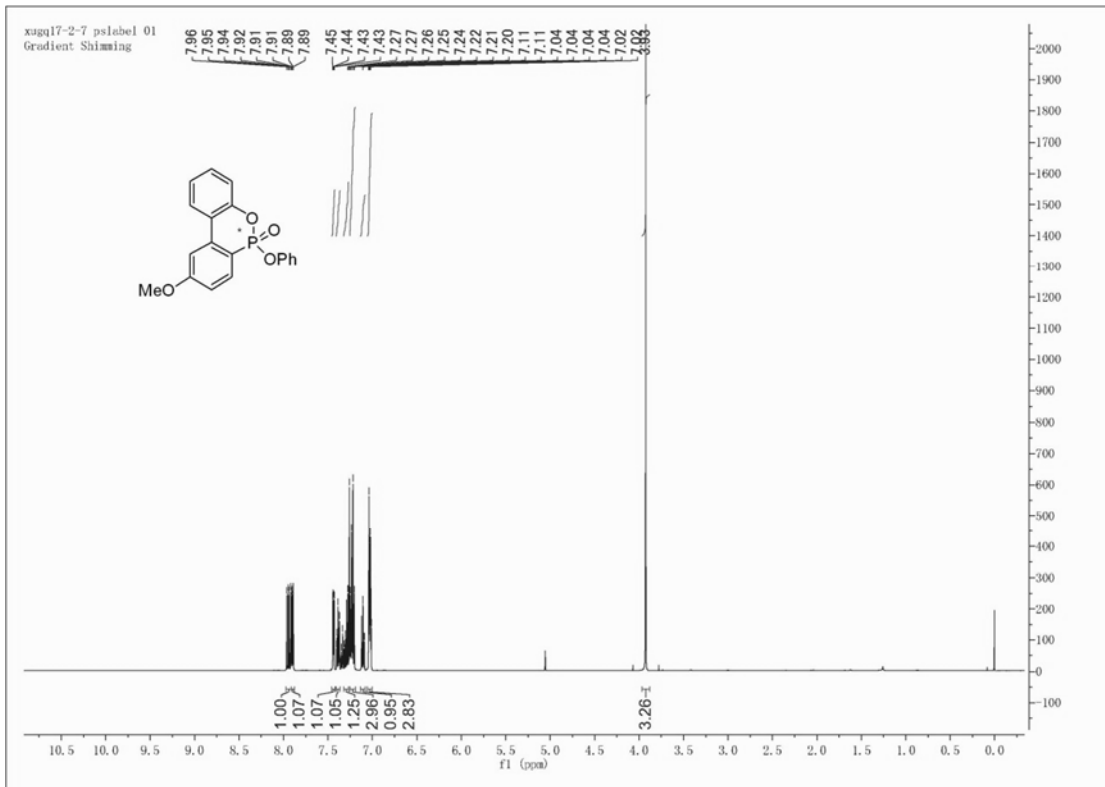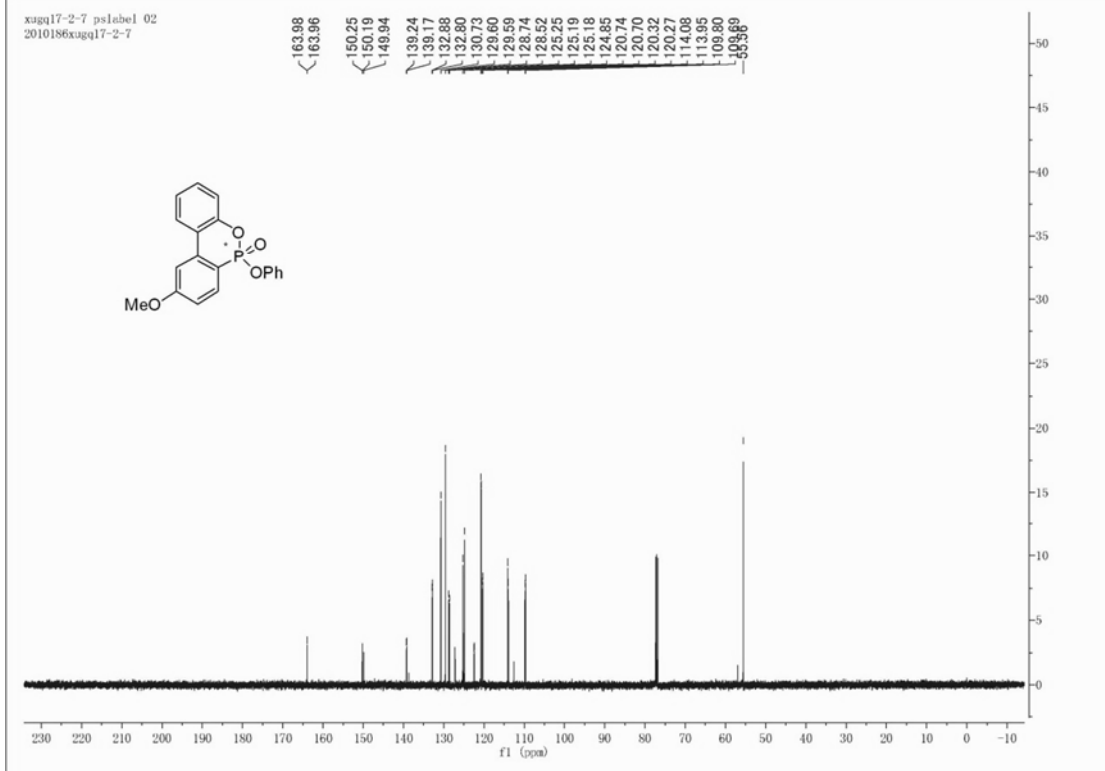



PHOSPHORUS 01  
2010186XUGQ17-2-7-P

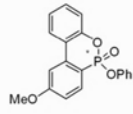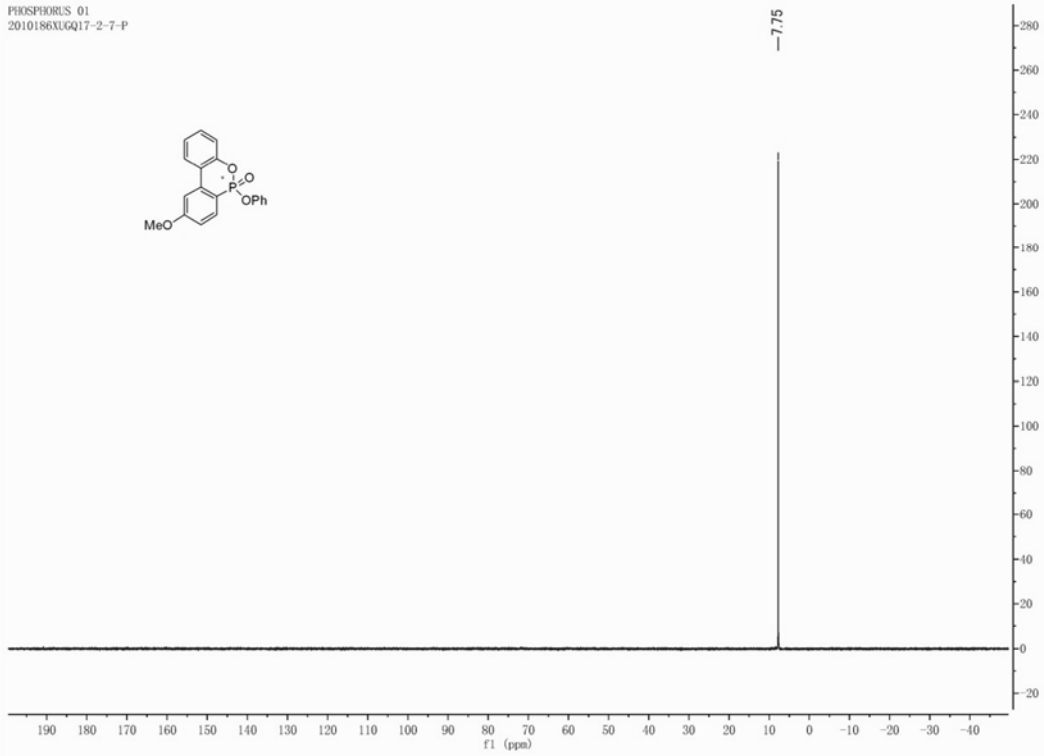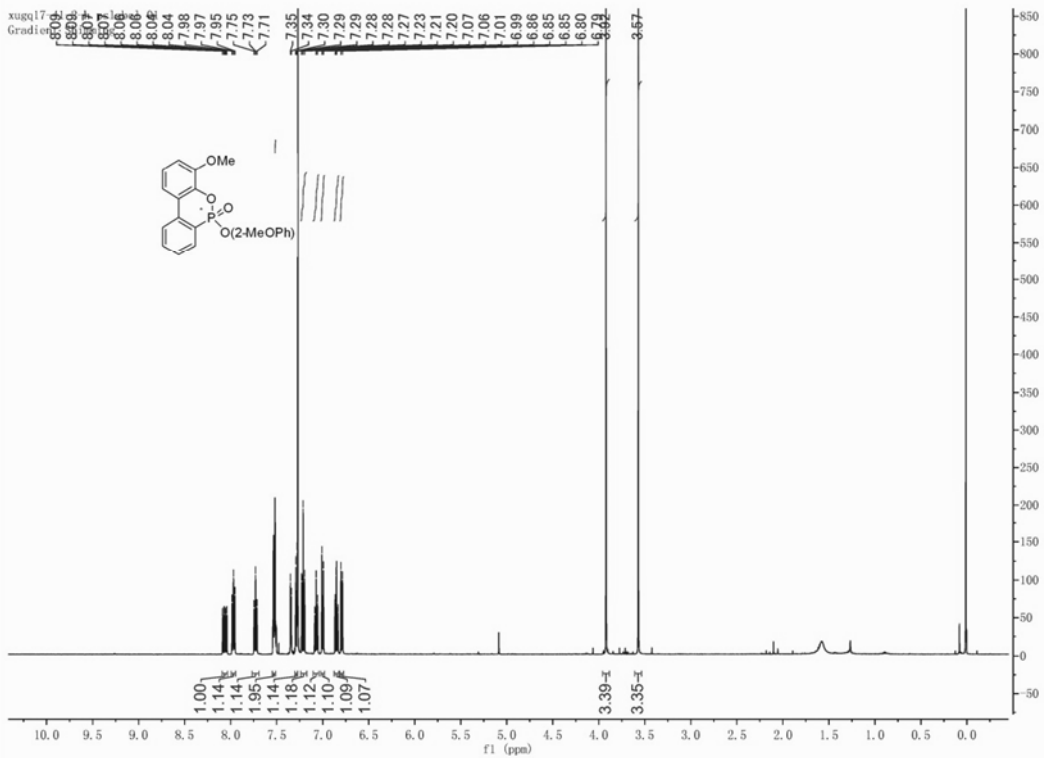

xugq17-41-2-c pslabel 02  
2010186xugq17-41-2-c

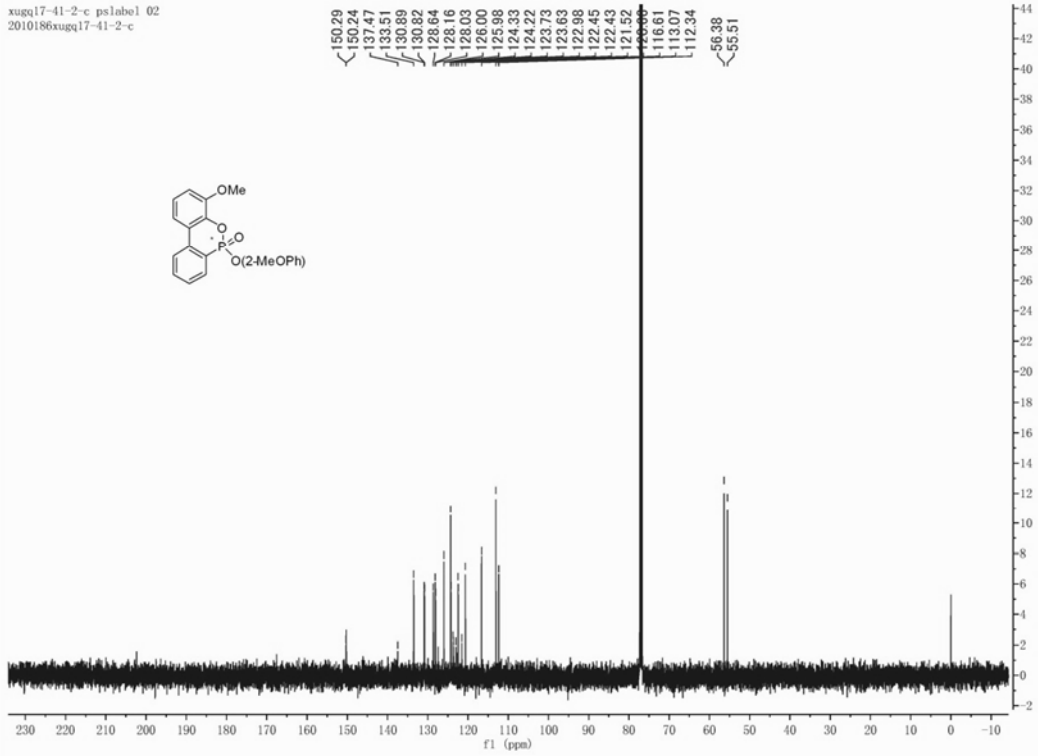

PHOSPHORUS 01  
2010186xugq17-41-1

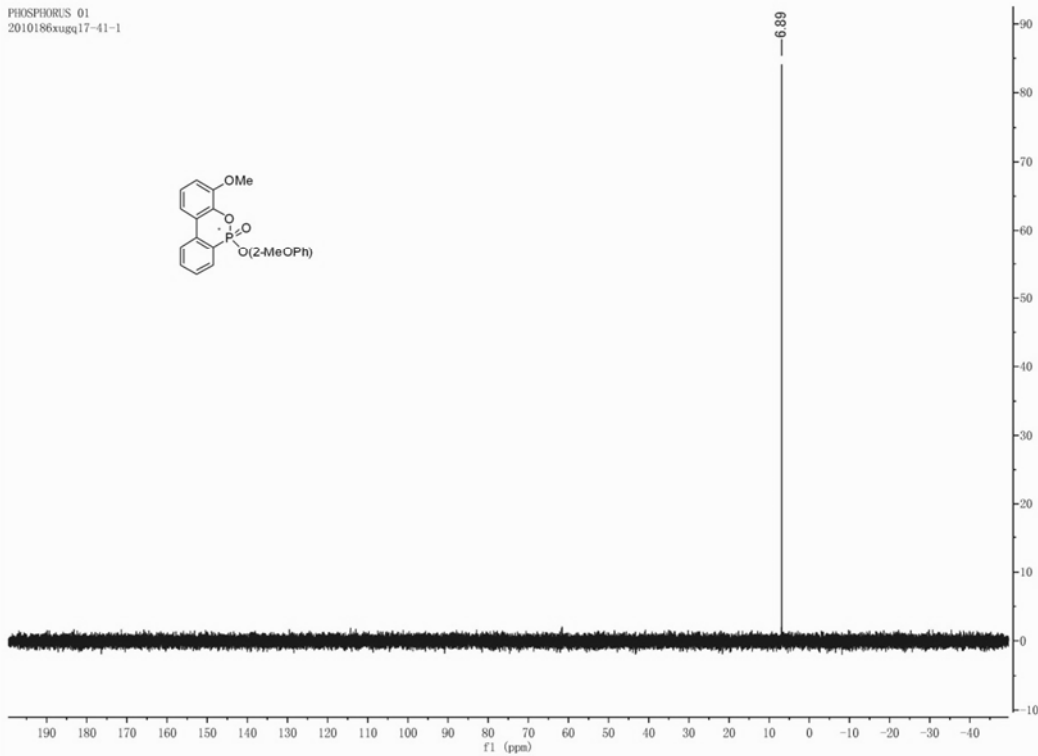

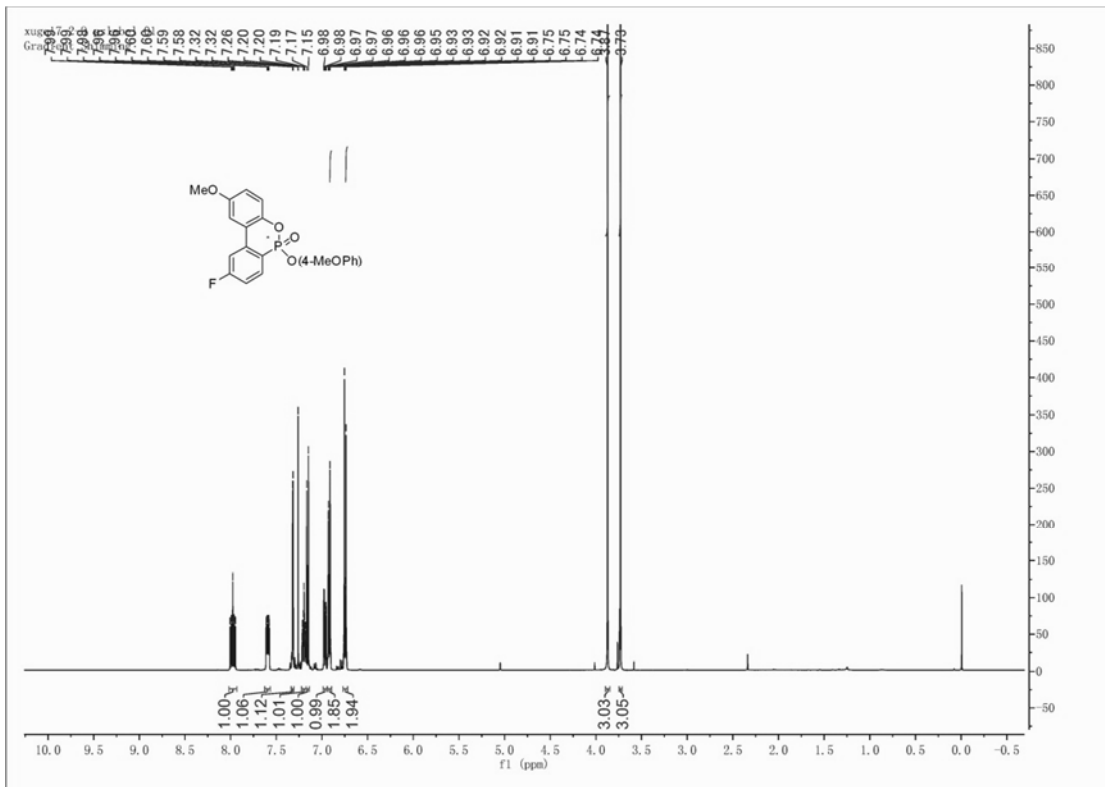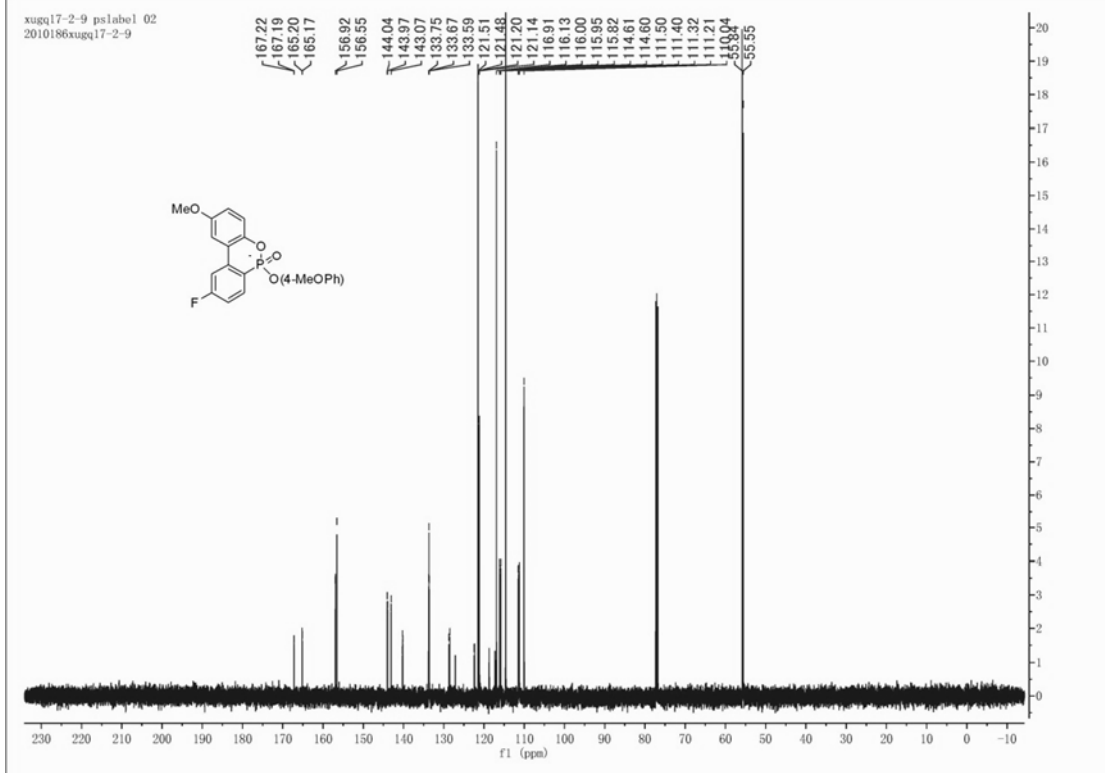

PHOSPHORUS 01  
2010186XUGQ17-2-9-P

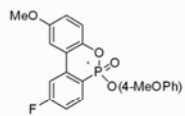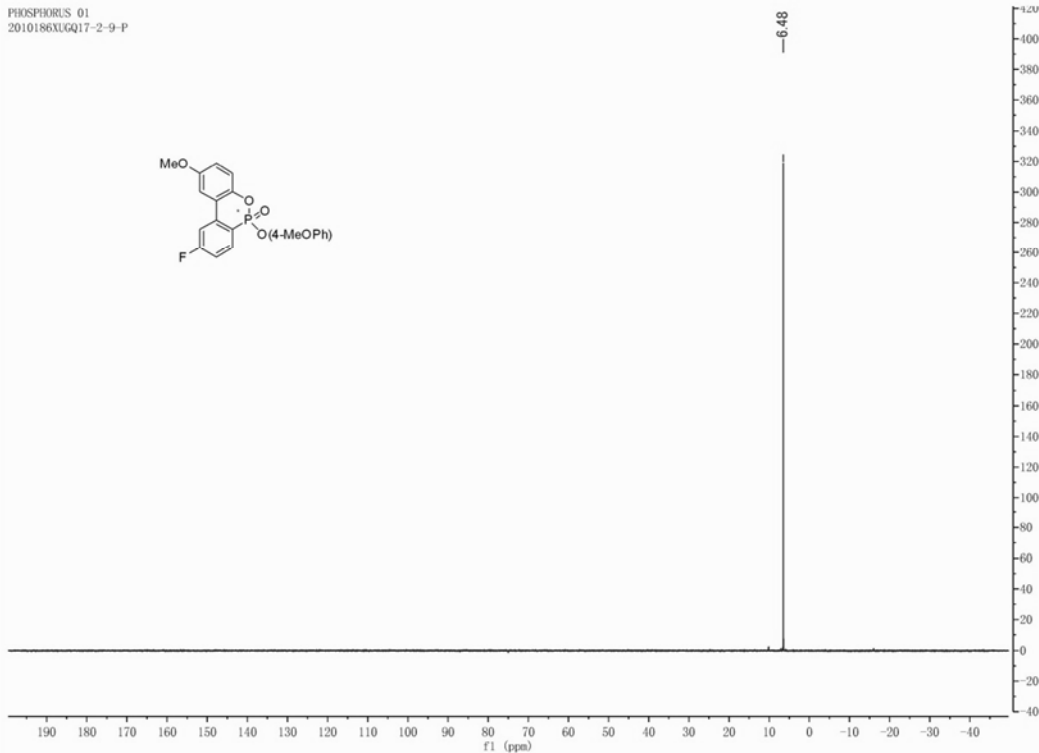

2010186-17-20-1 pslabel 01  
Gra

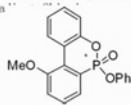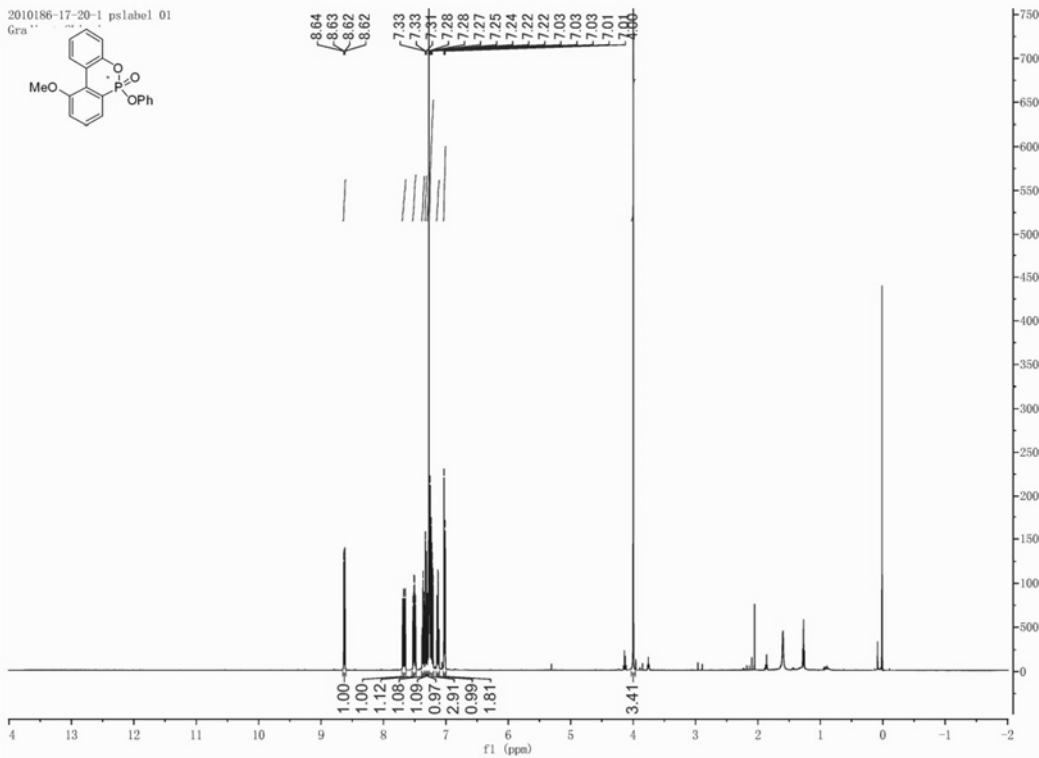

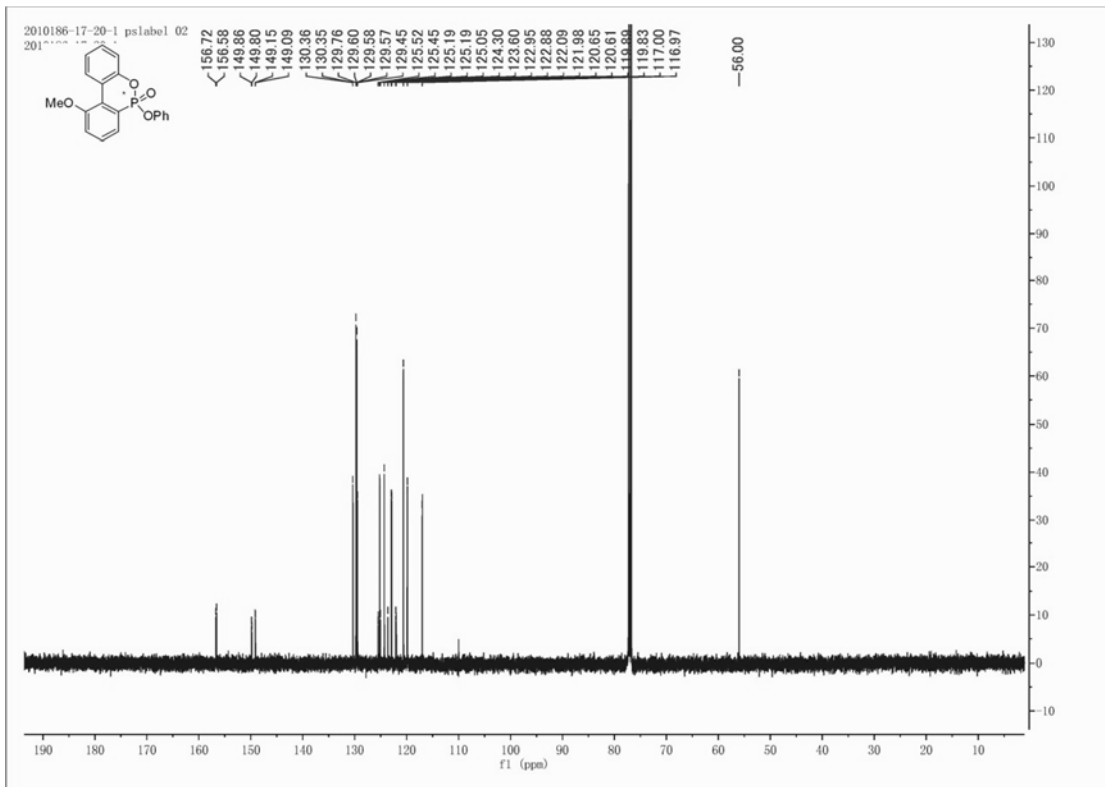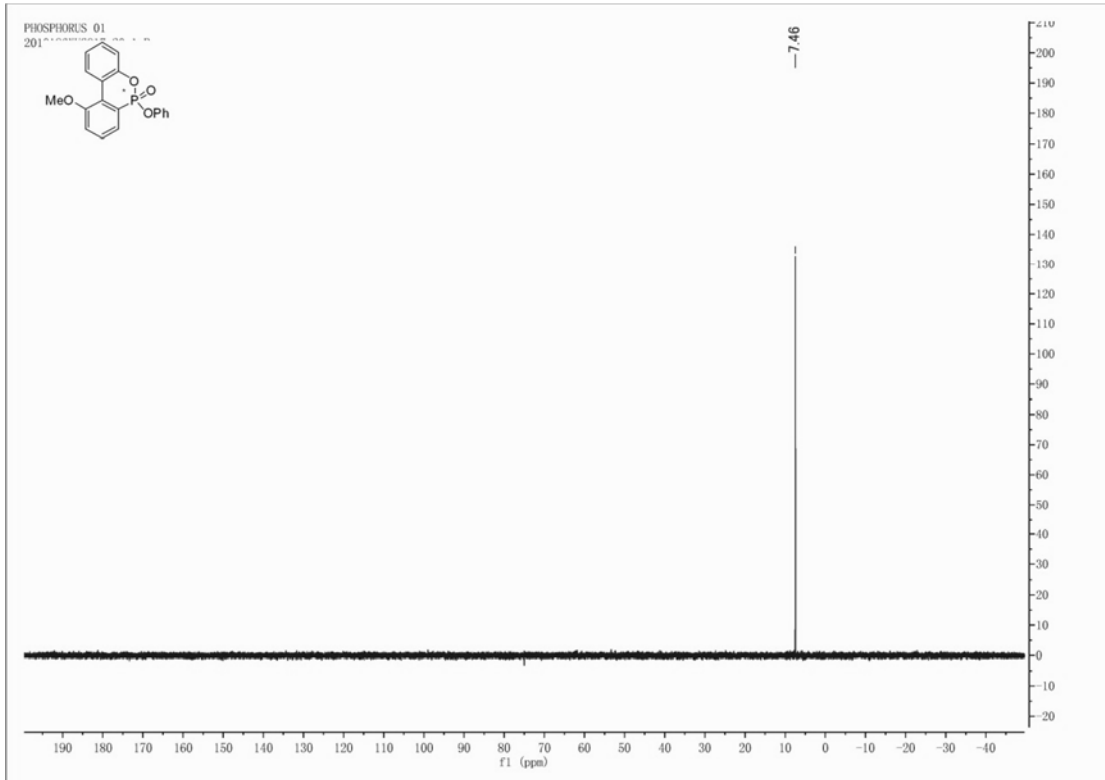



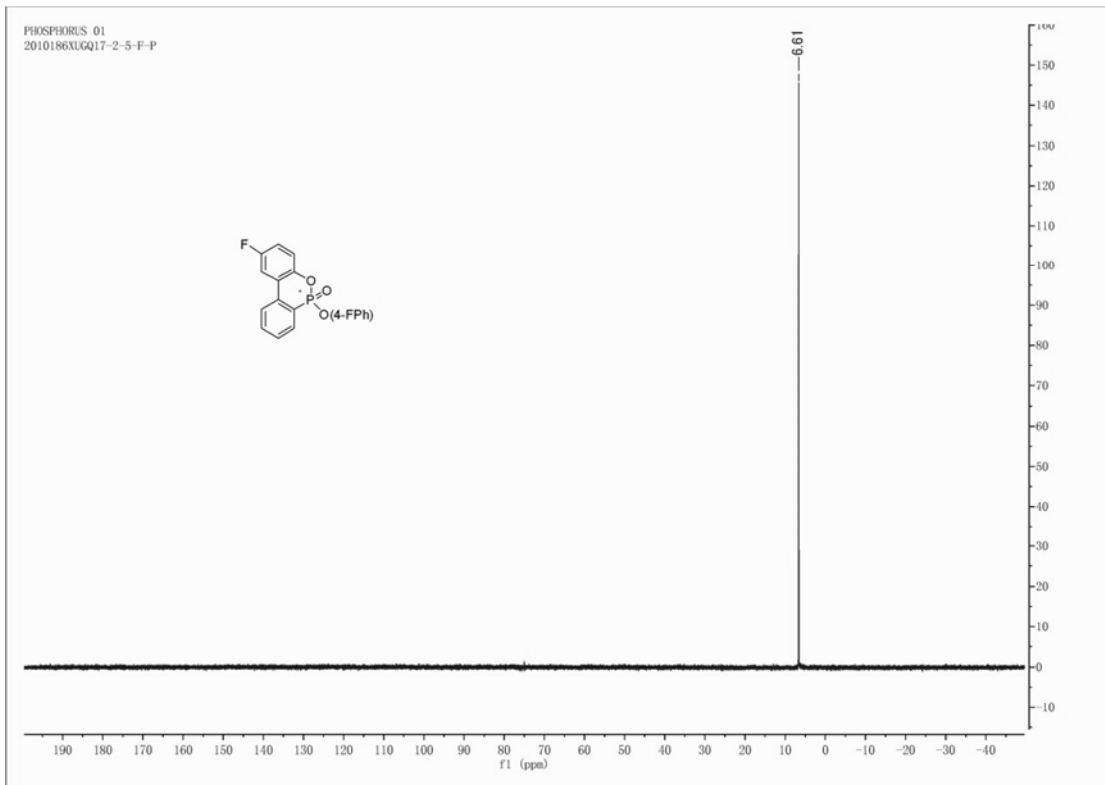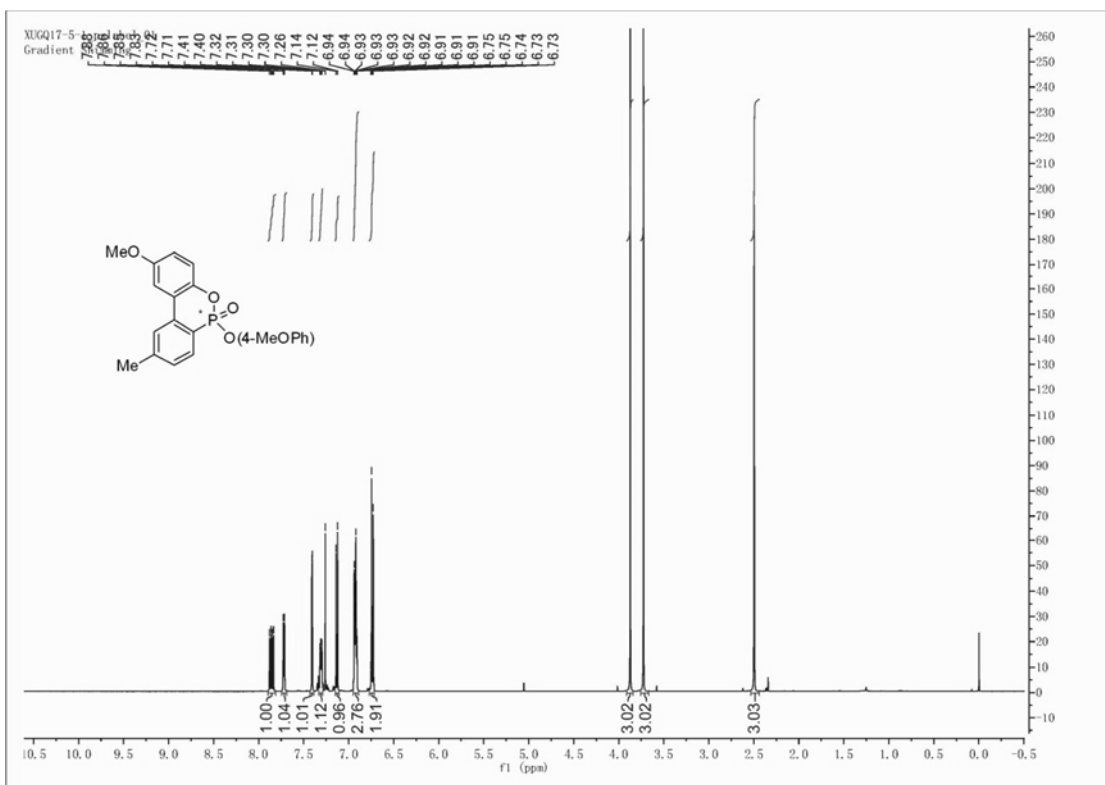

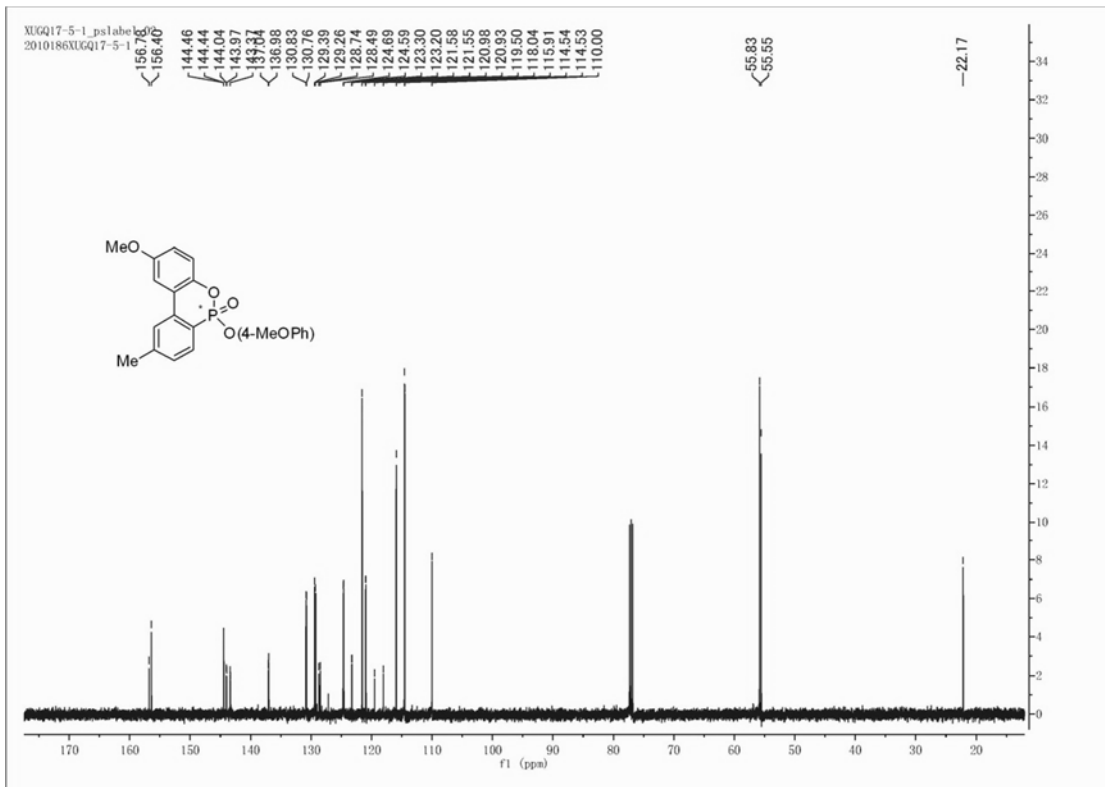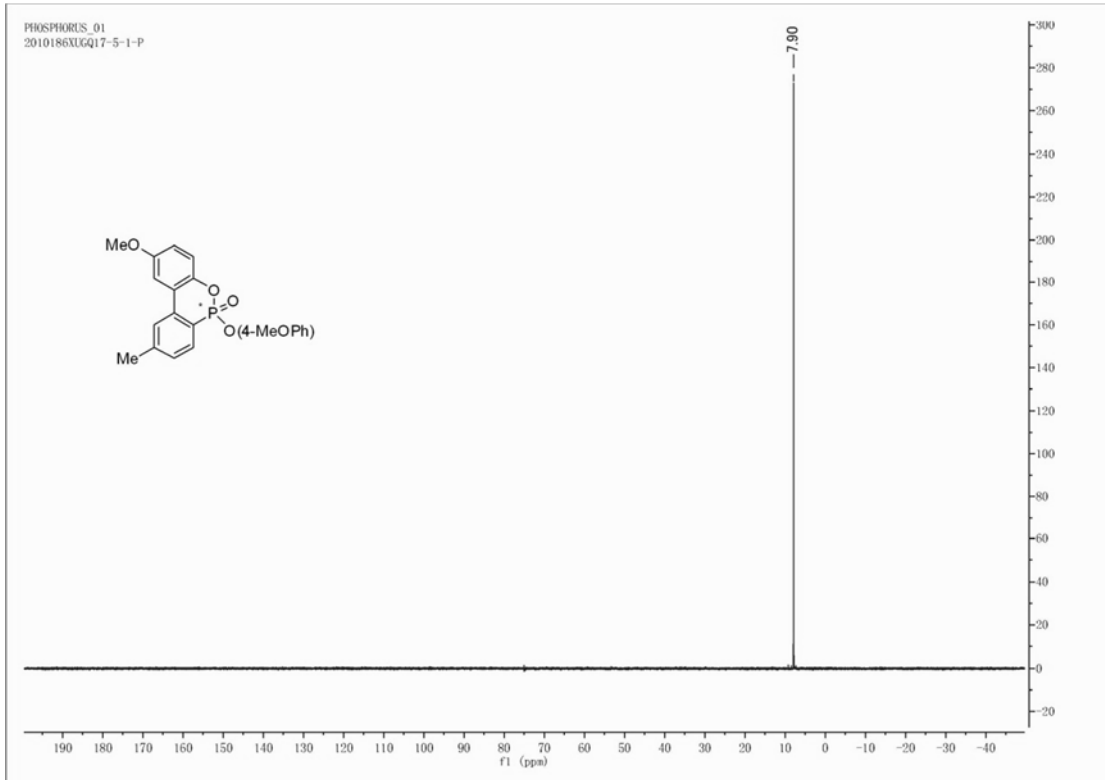



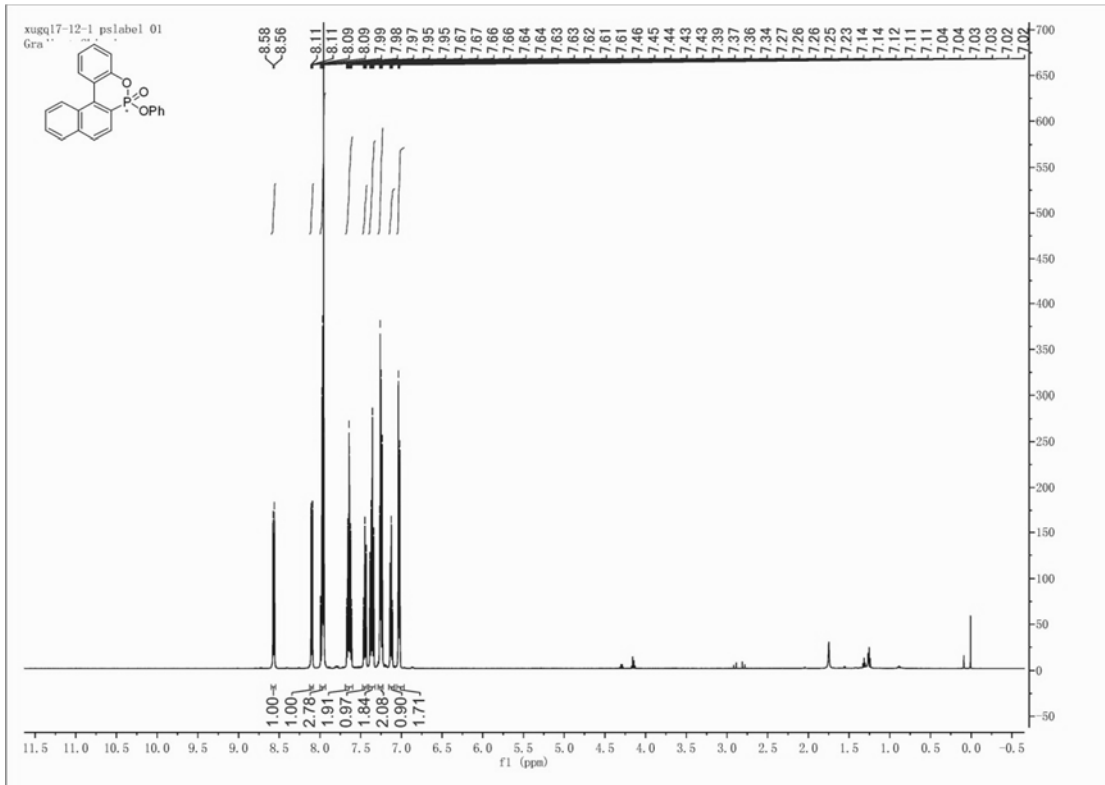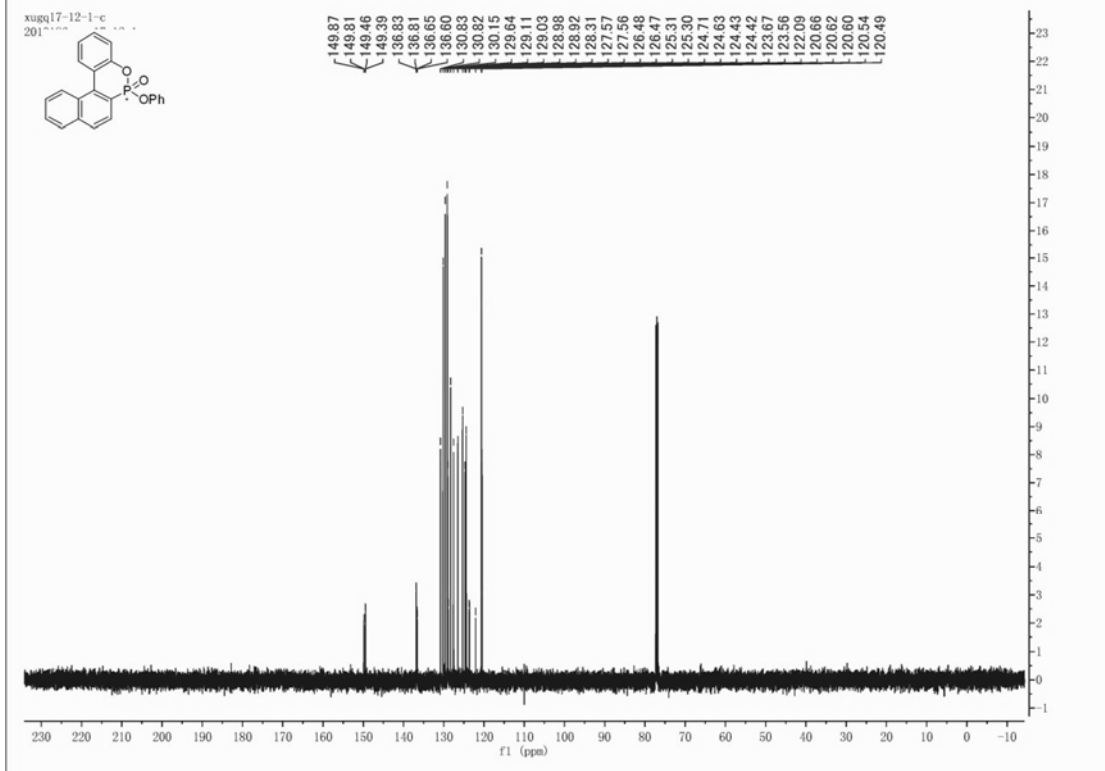

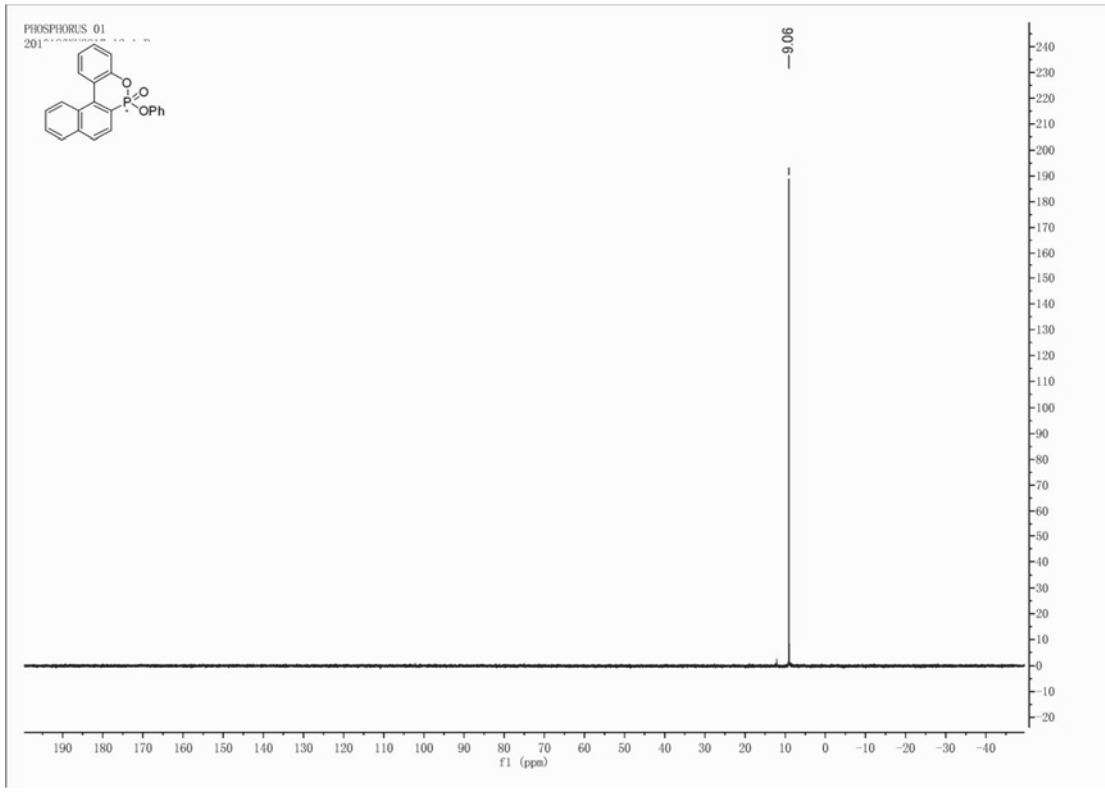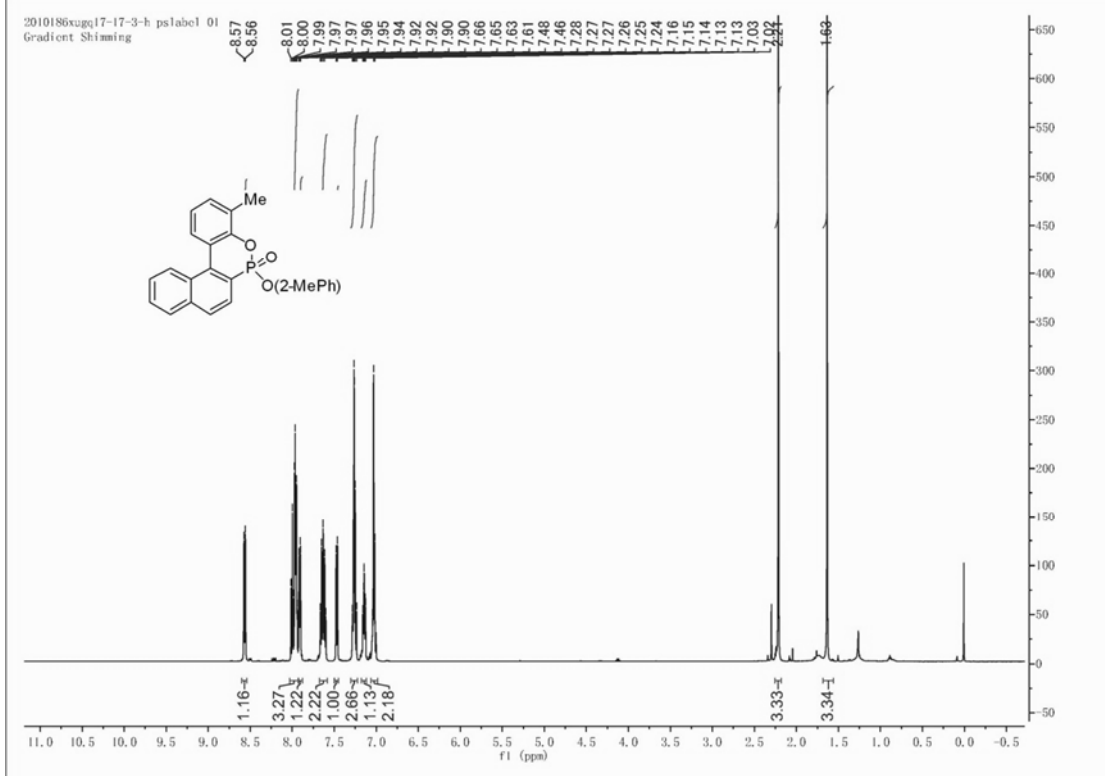

CARBON 01  
Gradient Shimming

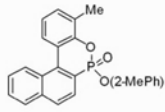

148.75  
148.68  
147.81  
147.74  
137.07  
137.02  
136.85  
136.83  
131.63  
131.25  
129.90  
129.86  
129.37  
129.32  
129.20  
129.09  
129.03  
128.95  
128.58  
128.57  
128.21  
127.40  
126.95  
126.74  
125.01  
124.83  
124.75  
123.80  
123.57  
123.46  
122.33  
120.84

15.80  
15.25

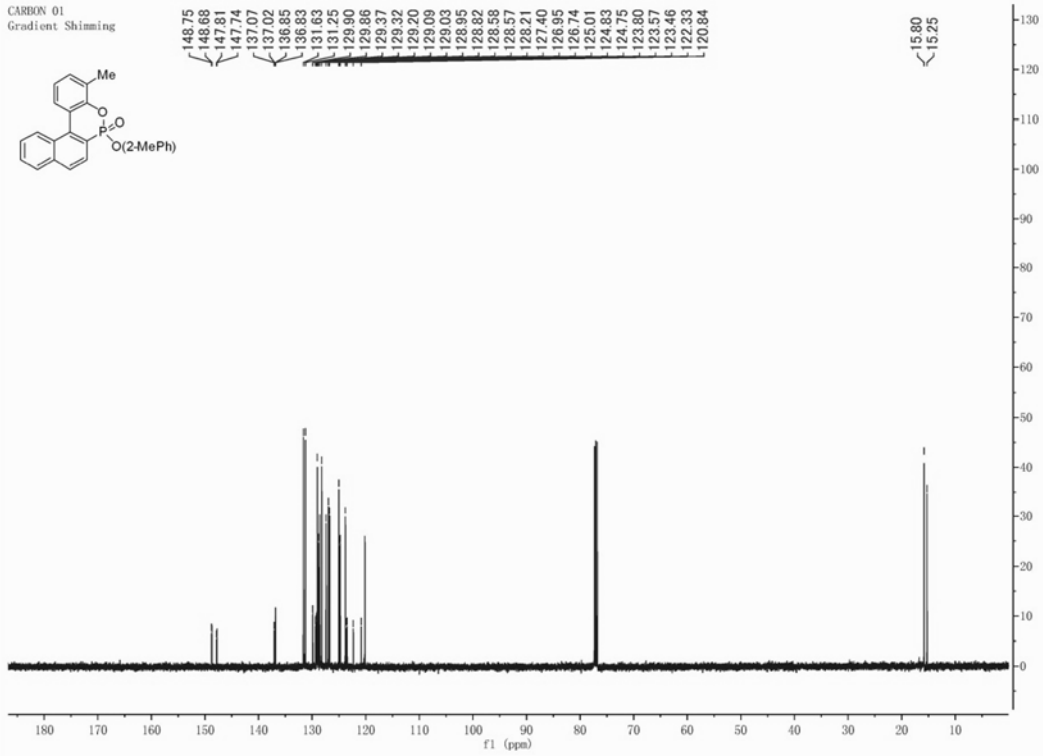

PHOSPHORUS 01  
2010186XUGQ17-17-3-P-PURE

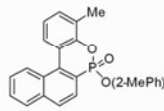

-9.24

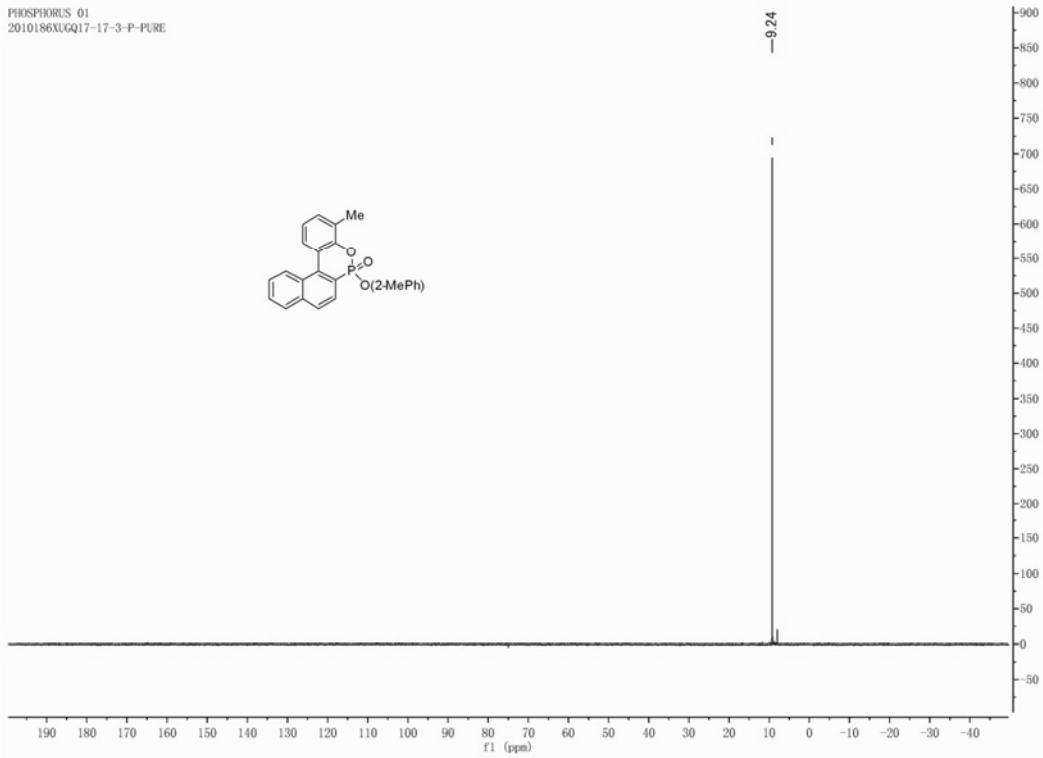

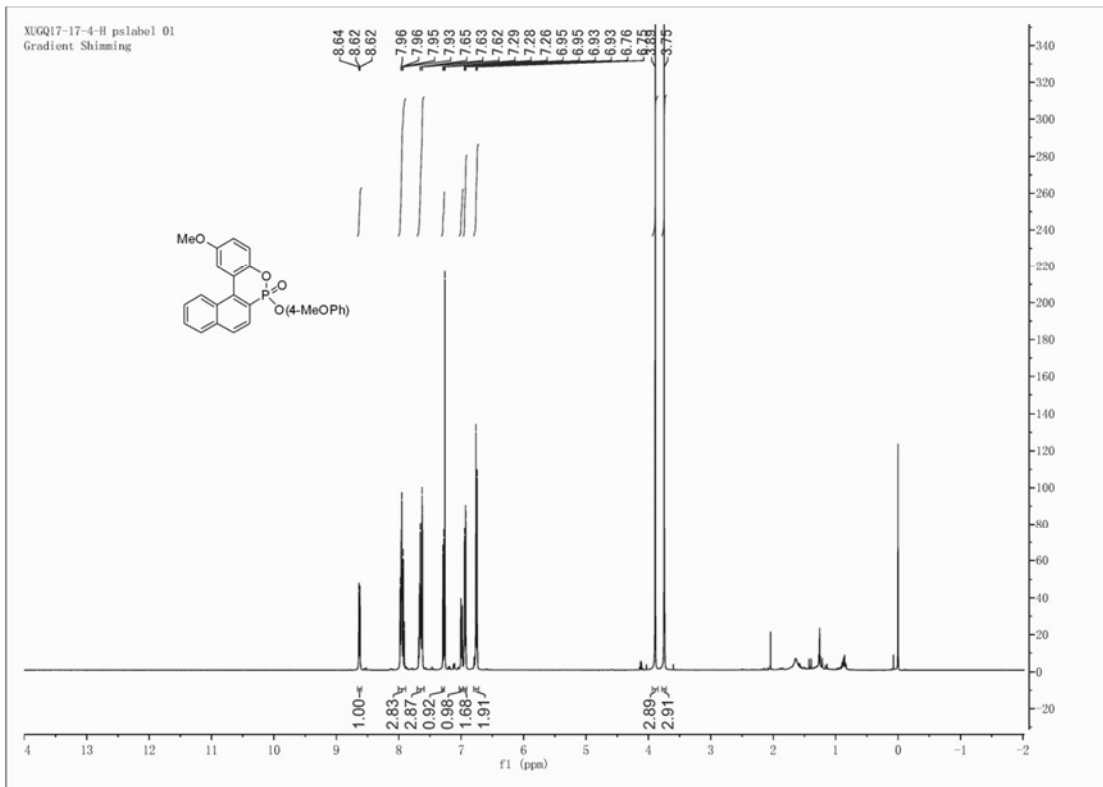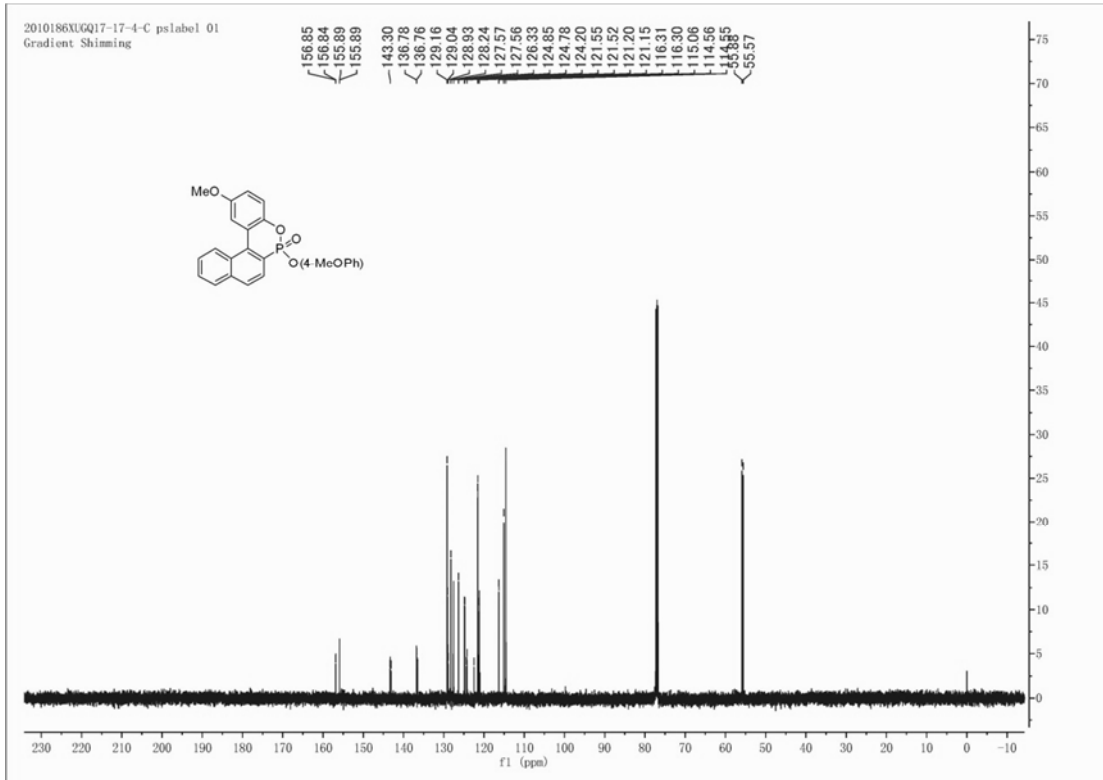

PHOSPHORUS 01  
2010186XUGQ17-17-4-P

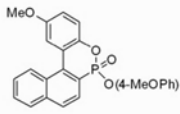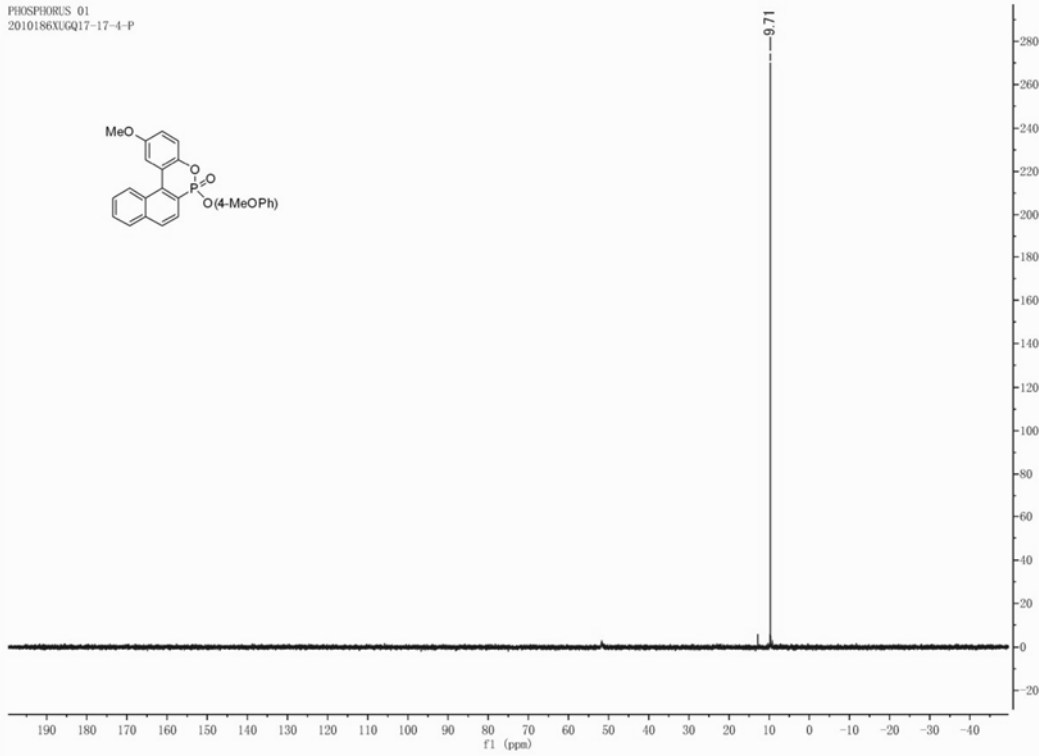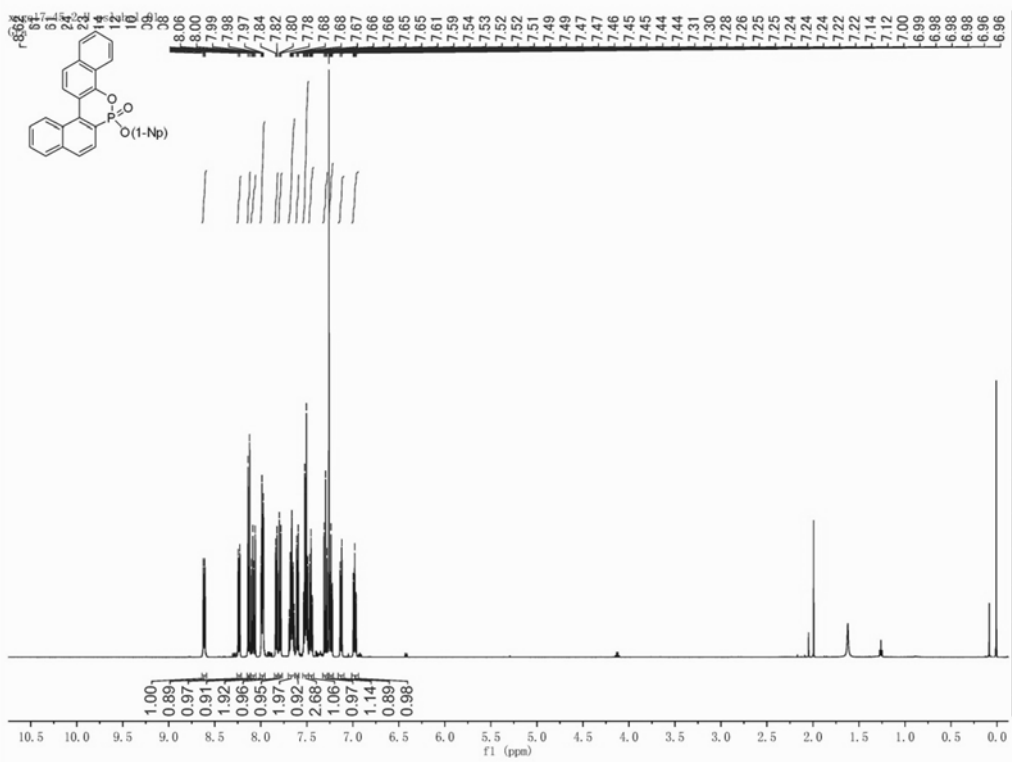

xug17-45-2-c-2  
Gradient Shimming

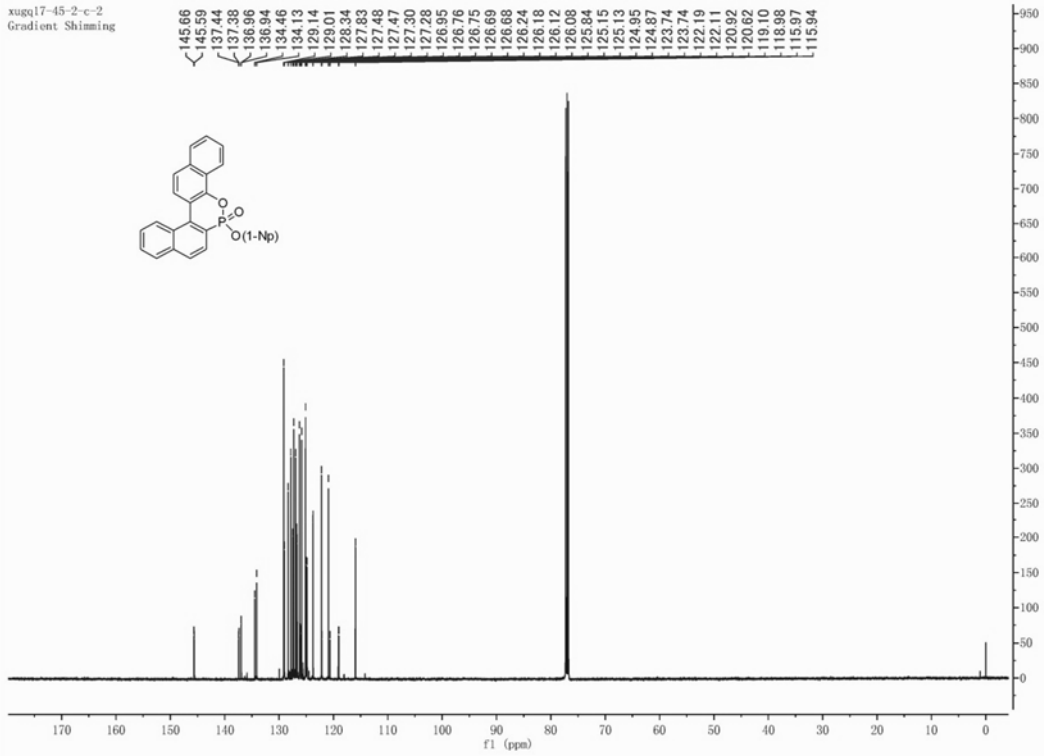

PHOSPHORUS 01  
201

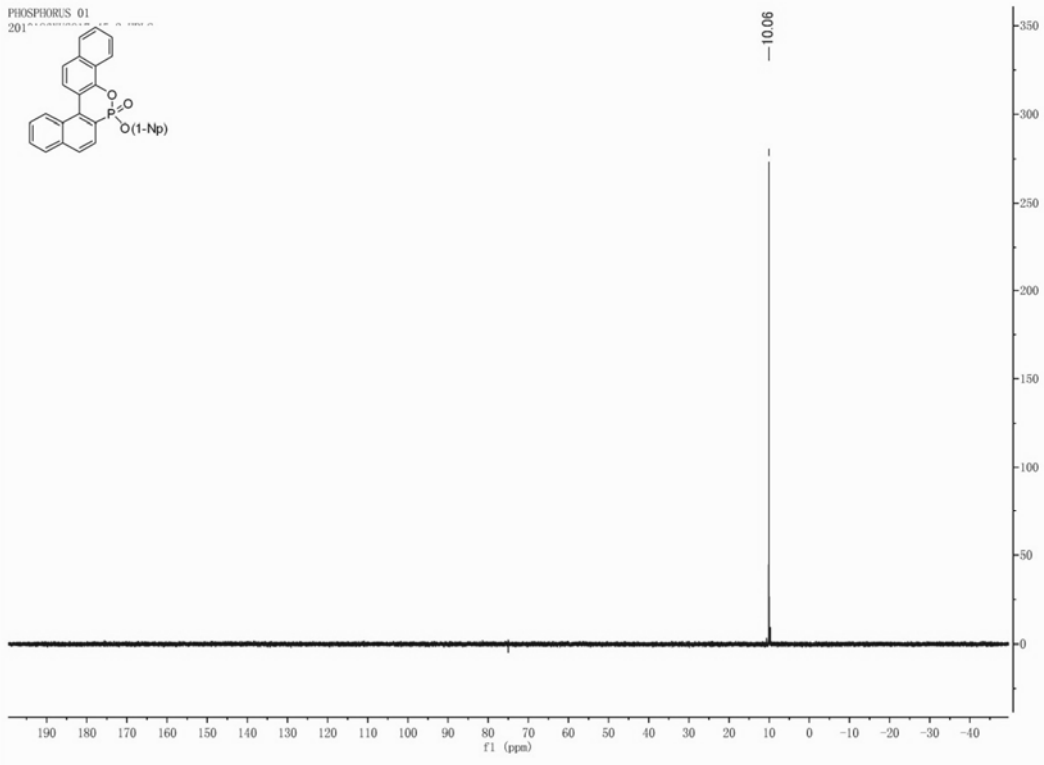

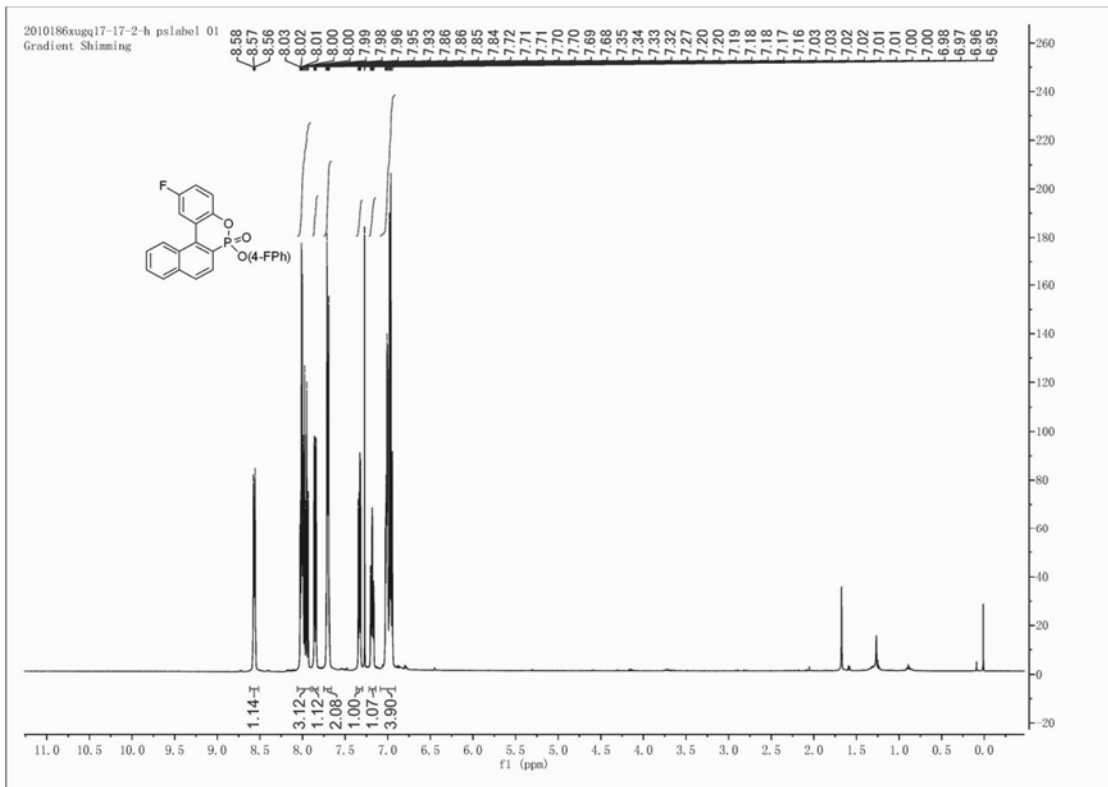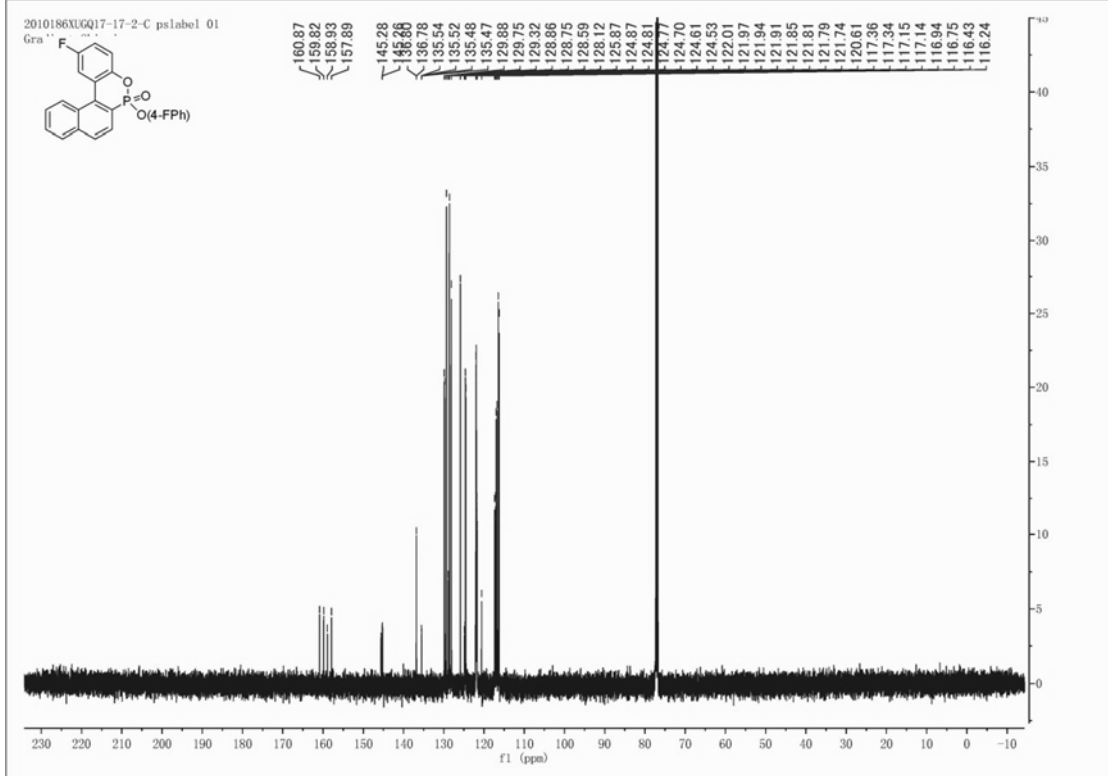





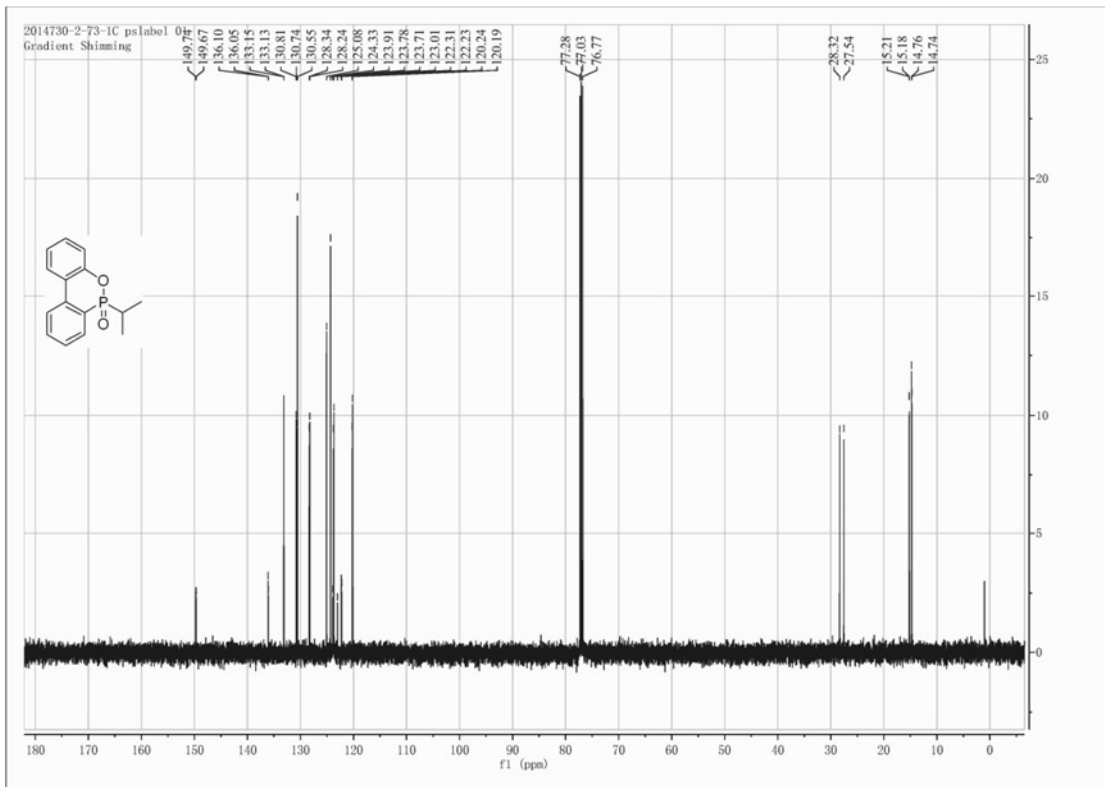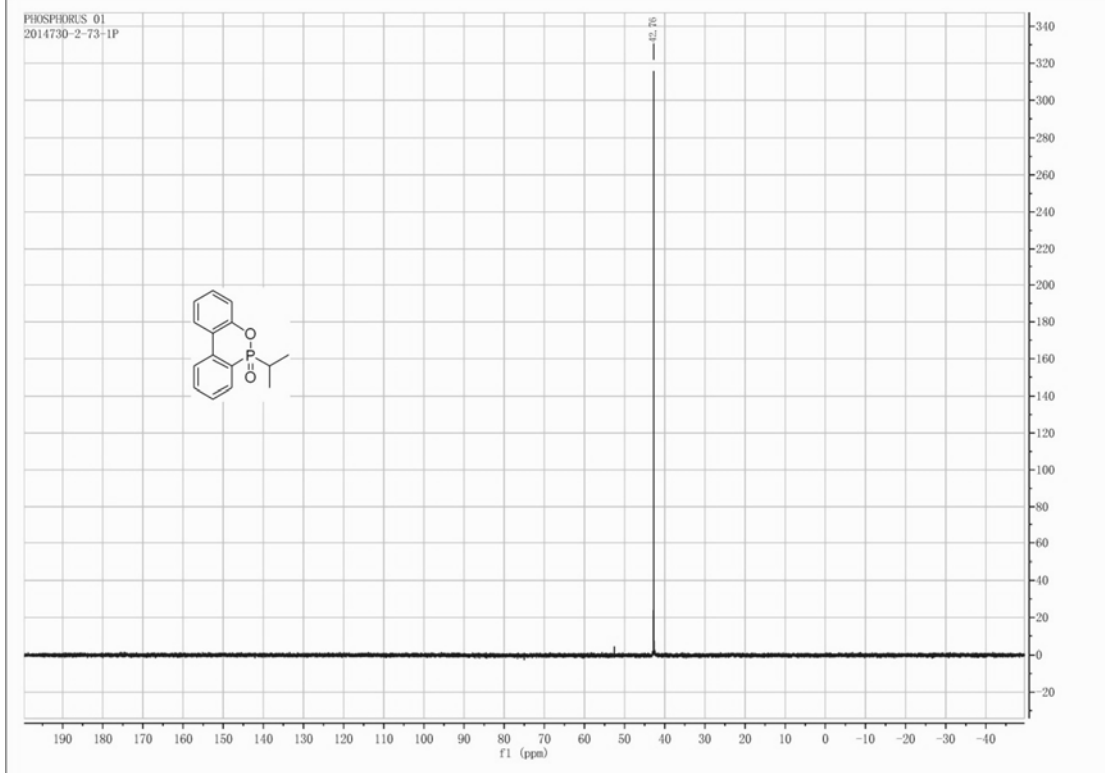

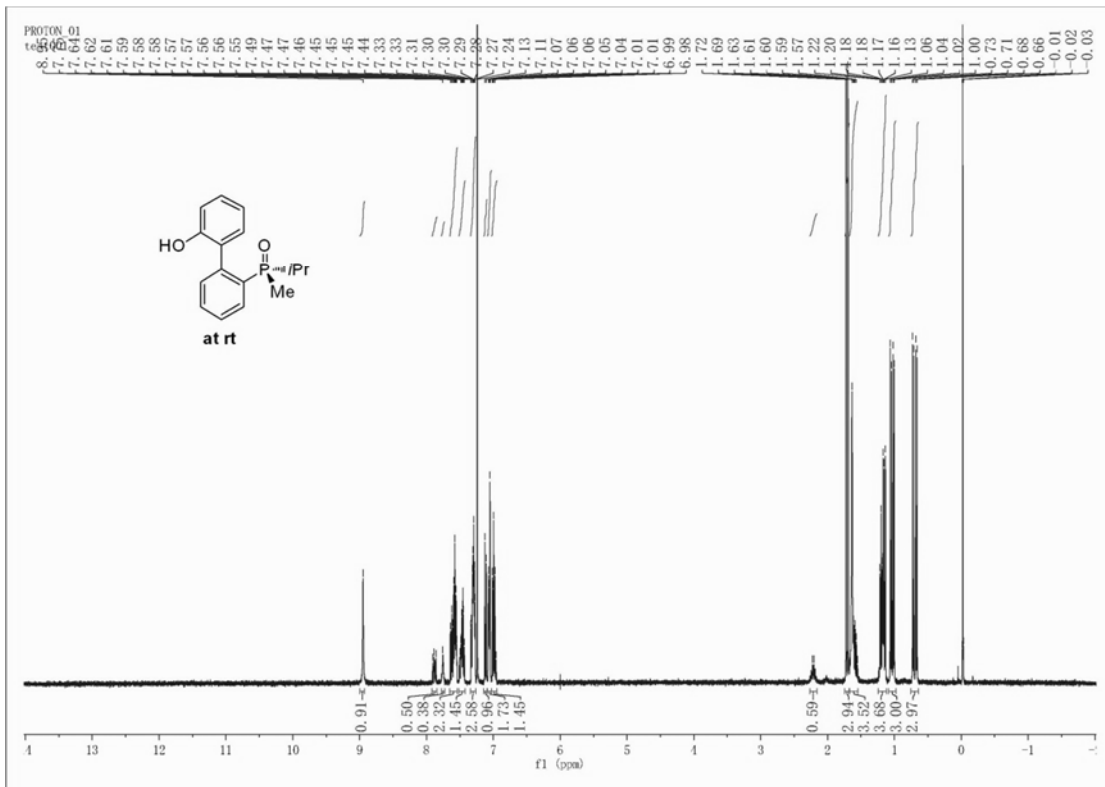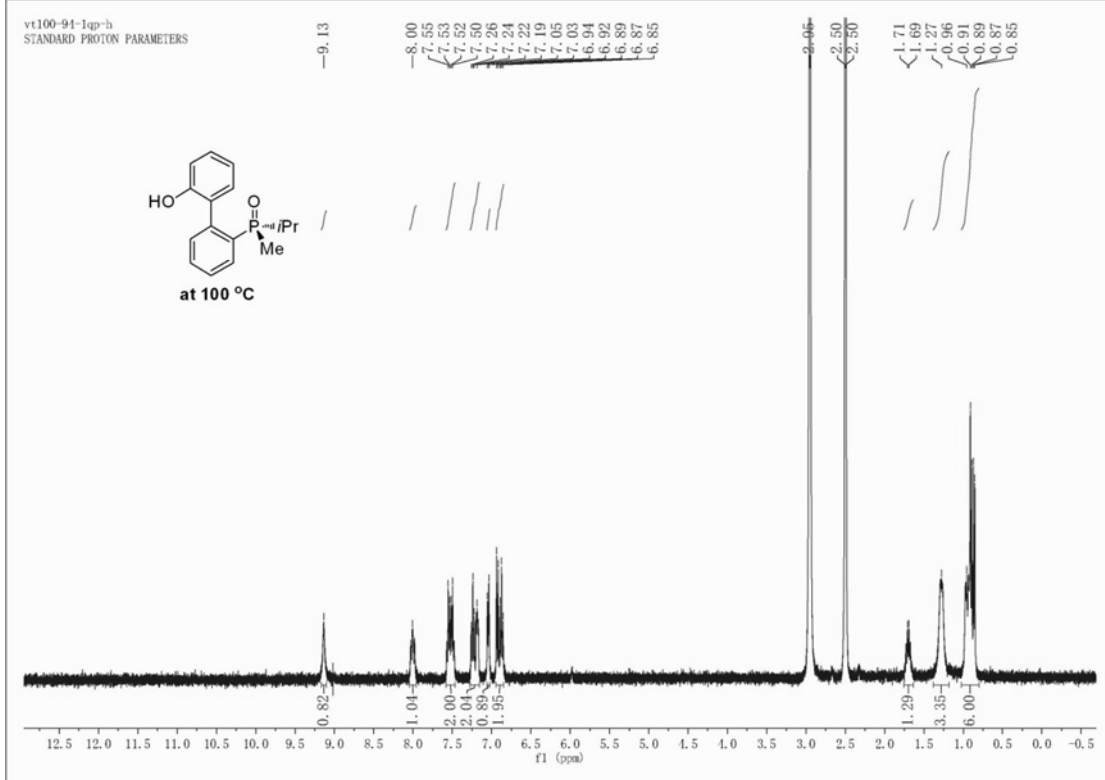

PHOSPHORUS\_01  
2014730-2-94-1H\_P

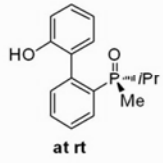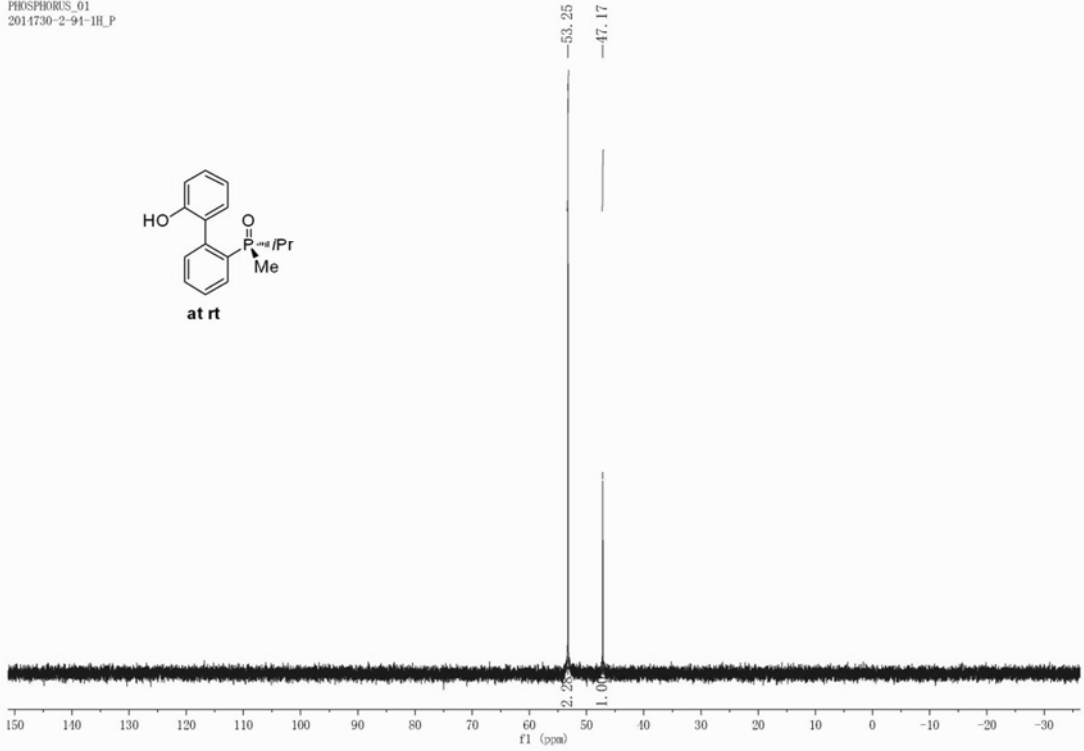

-2-94-1C  
Gradient Shimming

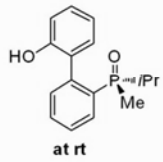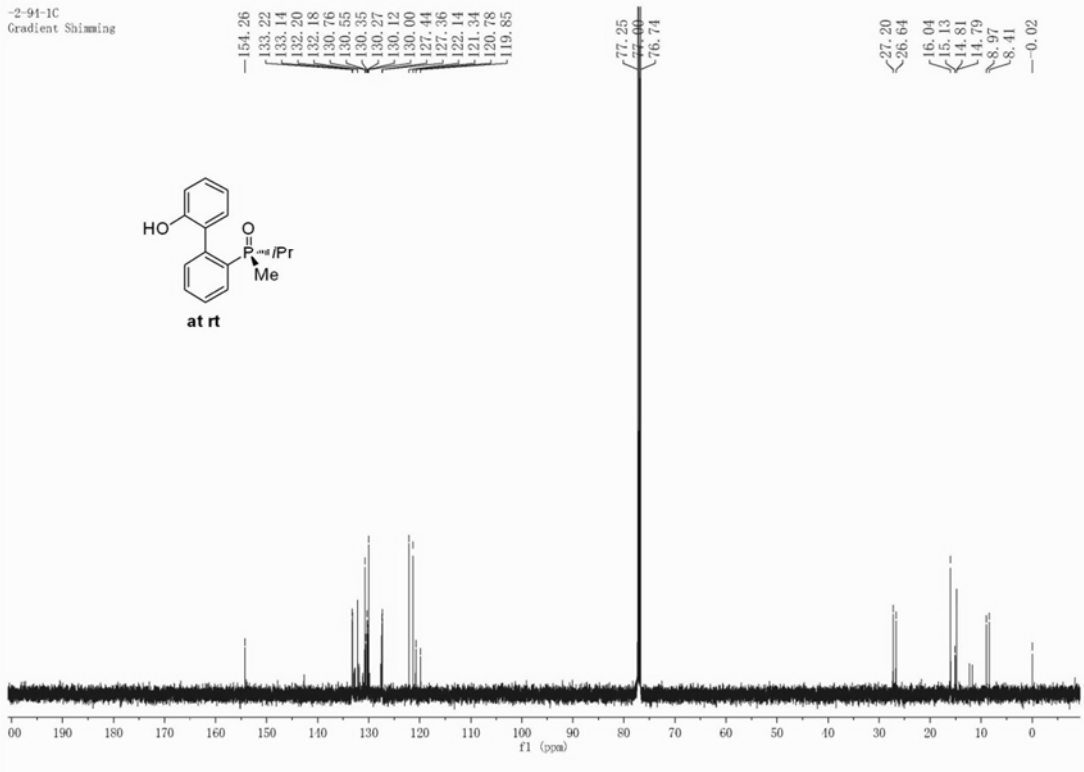

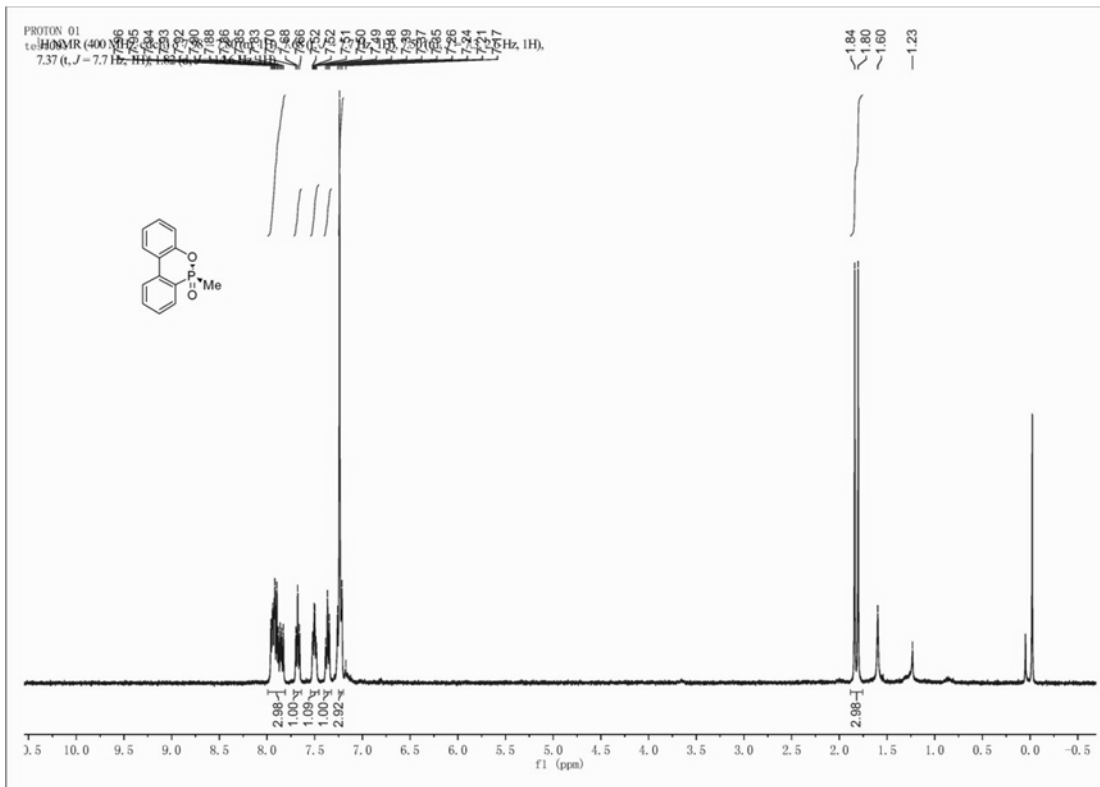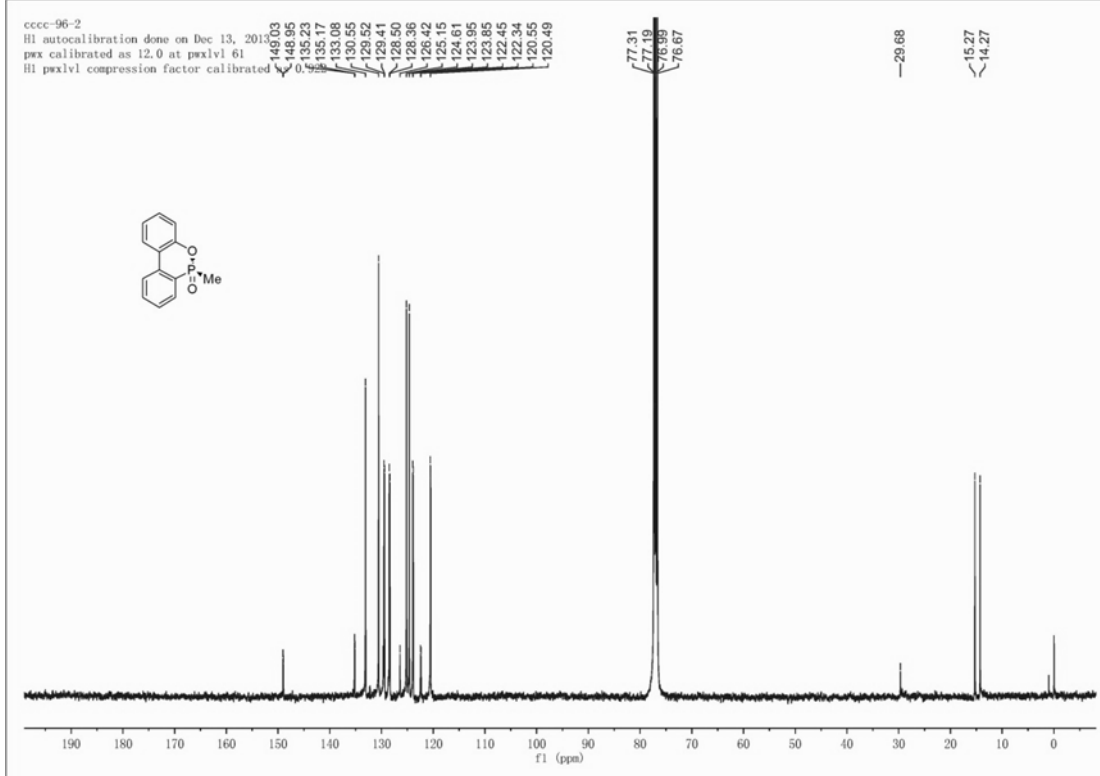

PHOSPHORUS 01  
2014730-2-96-2P

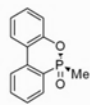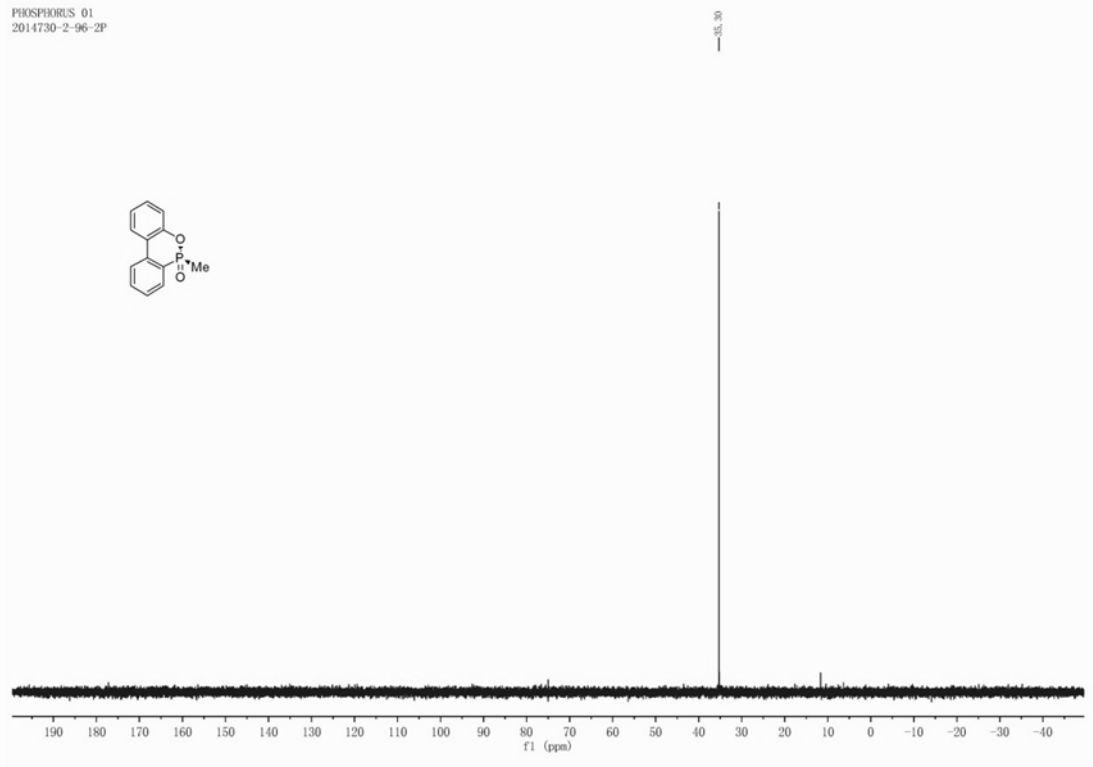

## 9. HPLC Charts

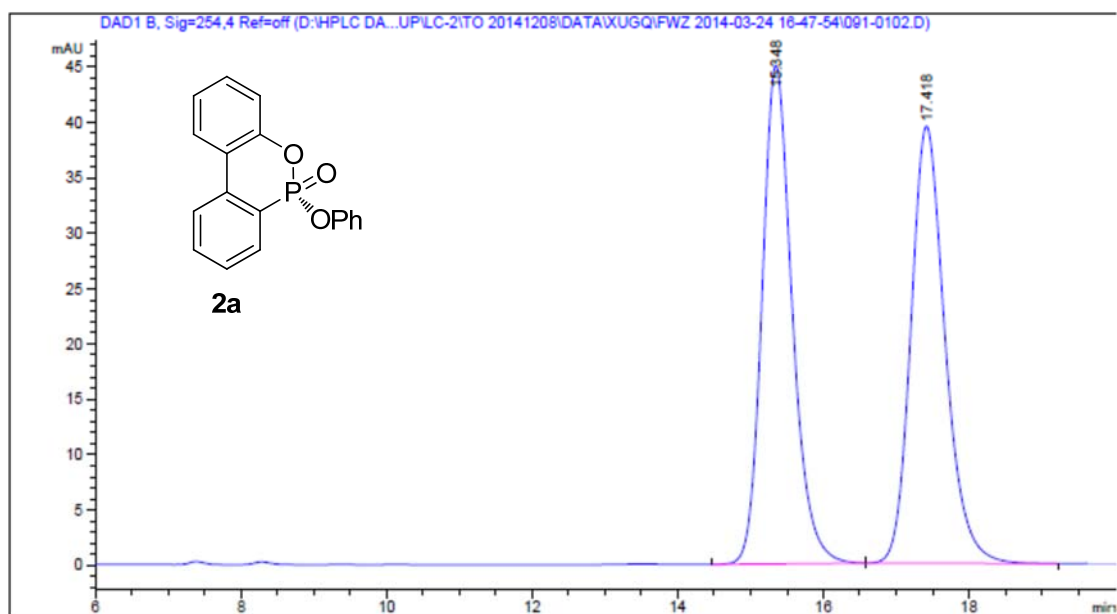

| 峰 # | 保留时间 [min] | 类型 | 峰宽 [min] | 峰面积 [mAU*s] | 峰高 [mAU] | 峰面积 %   |
|-----|------------|----|----------|-------------|----------|---------|
| 1   | 15.348     | BB | 0.4363   | 614.74786   | 21.45210 | 49.9999 |
| 2   | 17.417     | BB | 0.4968   | 614.75055   | 18.83336 | 50.0001 |

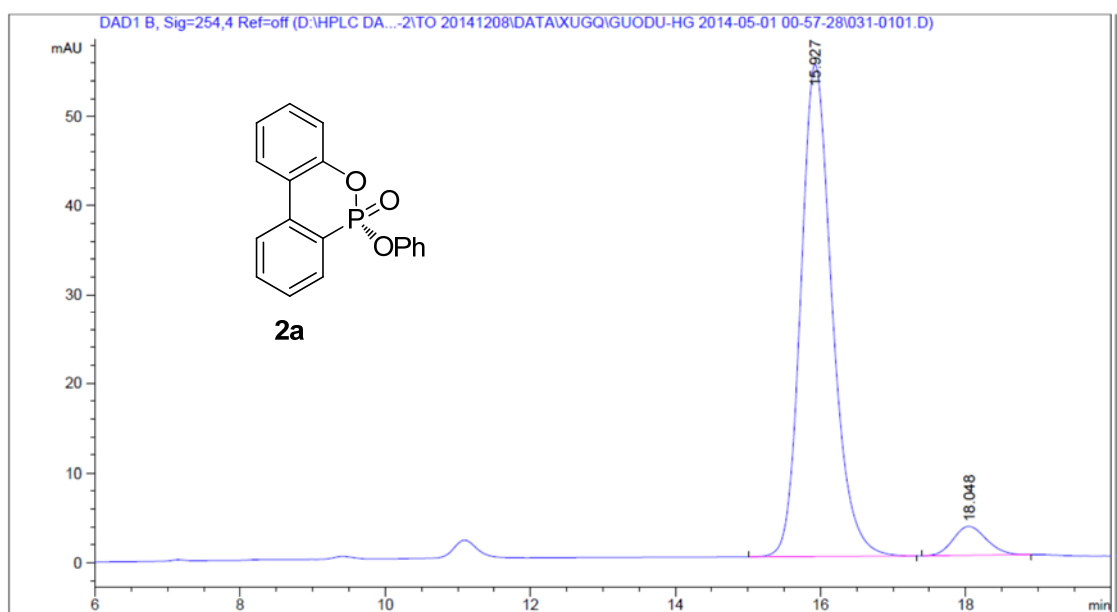

| 峰 # | 保留时间 [min] | 类型 | 峰宽 [min] | 峰面积 [mAU*s] | 峰高 [mAU] | 峰面积 %   |
|-----|------------|----|----------|-------------|----------|---------|
| 1   | 15.927     | BB | 0.4569   | 1649.40674  | 55.15456 | 94.1011 |
| 2   | 18.048     | BB | 0.4764   | 103.39570   | 3.23915  | 5.8989  |

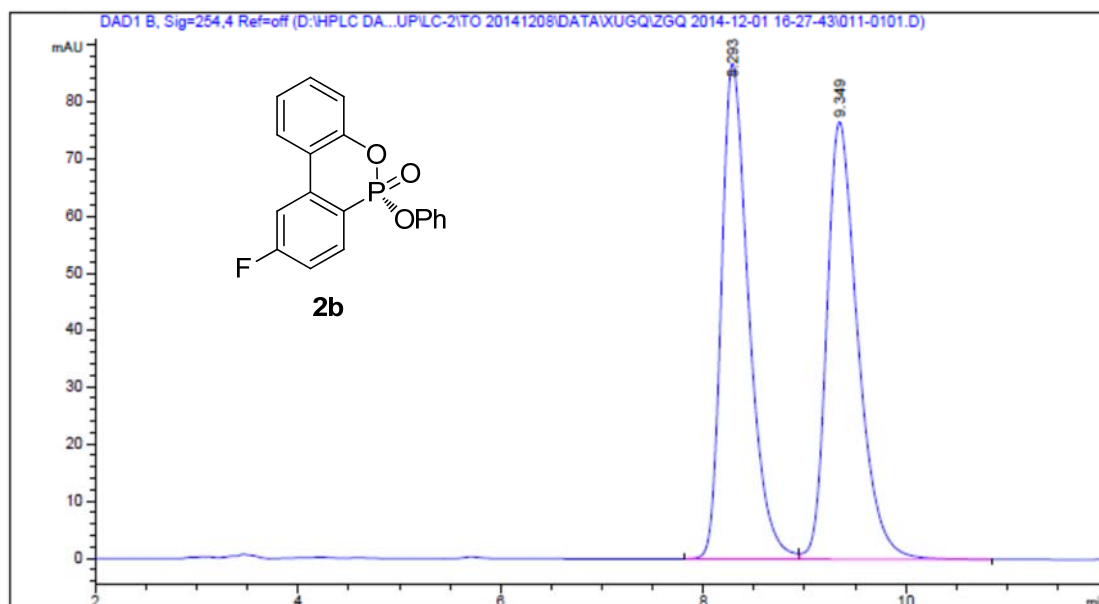

| 峰 # | 保留时间 [min] | 类型 | 峰宽 [min] | 峰面积 [mAU*s] | 峰高 [mAU] | 峰面积 %   |
|-----|------------|----|----------|-------------|----------|---------|
| 1   | 8.293      | BV | 0.2844   | 1623.65710  | 86.75245 | 49.9039 |
| 2   | 9.349      | VB | 0.3224   | 1629.91235  | 76.56569 | 50.0961 |

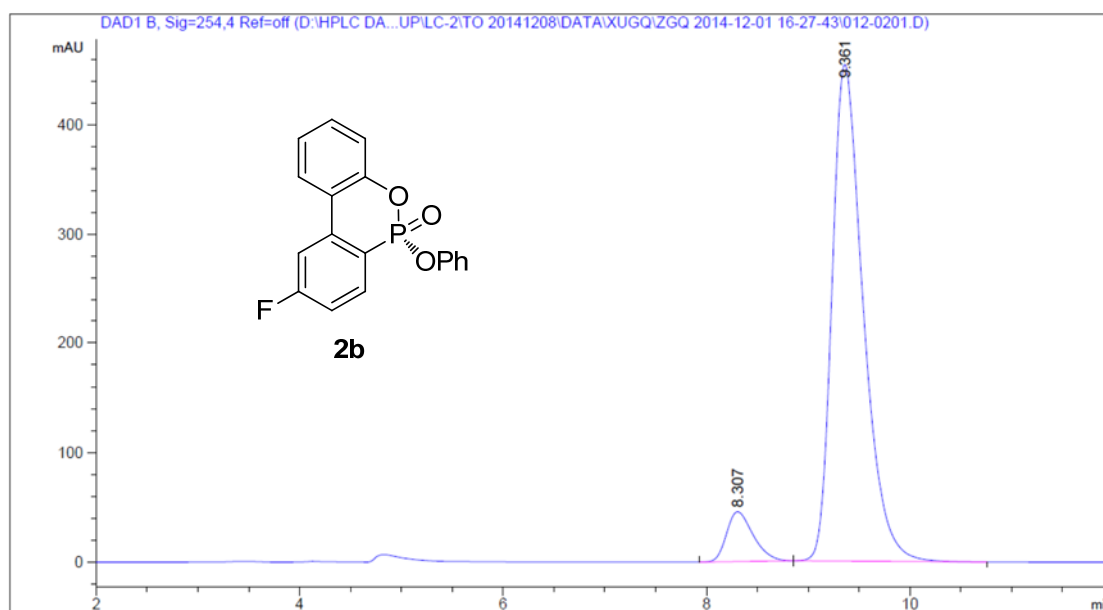

| 峰 # | 保留时间 [min] | 类型 | 峰宽 [min] | 峰面积 [mAU*s] | 峰高 [mAU]  | 峰面积 %   |
|-----|------------|----|----------|-------------|-----------|---------|
| 1   | 8.307      | BB | 0.2778   | 823.65344   | 45.36678  | 7.8672  |
| 2   | 9.361      | BB | 0.3219   | 9645.76953  | 454.00473 | 92.1328 |

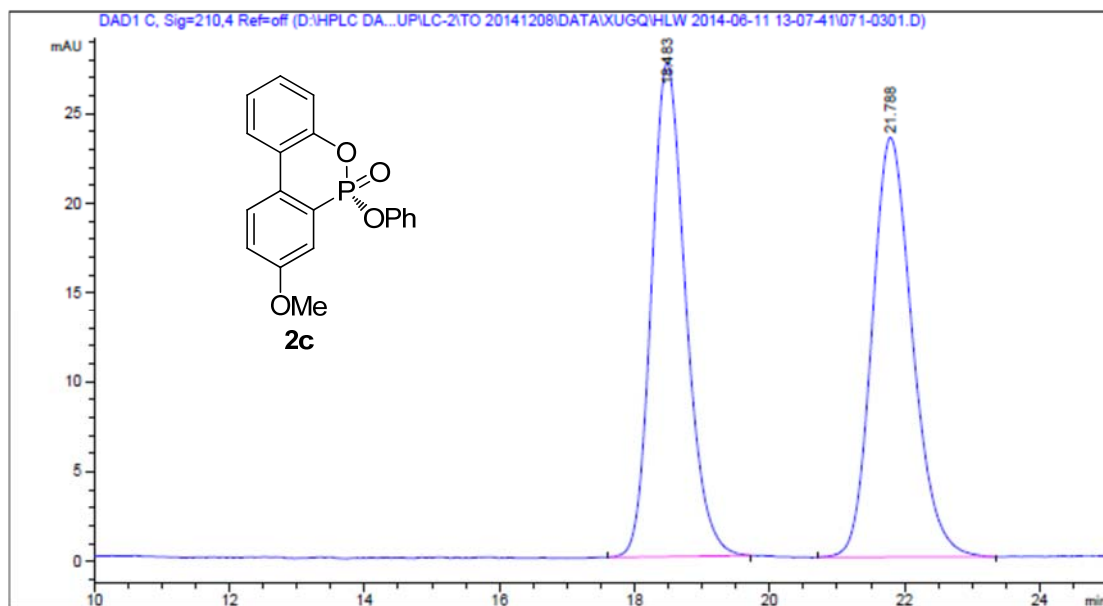

| 峰 # | 保留时间 [min] | 类型 | 峰宽 [min] | 峰面积 [mAU*s] | 峰高 [mAU] | 峰面积 %   |
|-----|------------|----|----------|-------------|----------|---------|
| 1   | 18.483     | BB | 0.5431   | 966.84210   | 27.57523 | 49.8518 |
| 2   | 21.788     | BB | 0.6242   | 972.58972   | 23.43362 | 50.1482 |

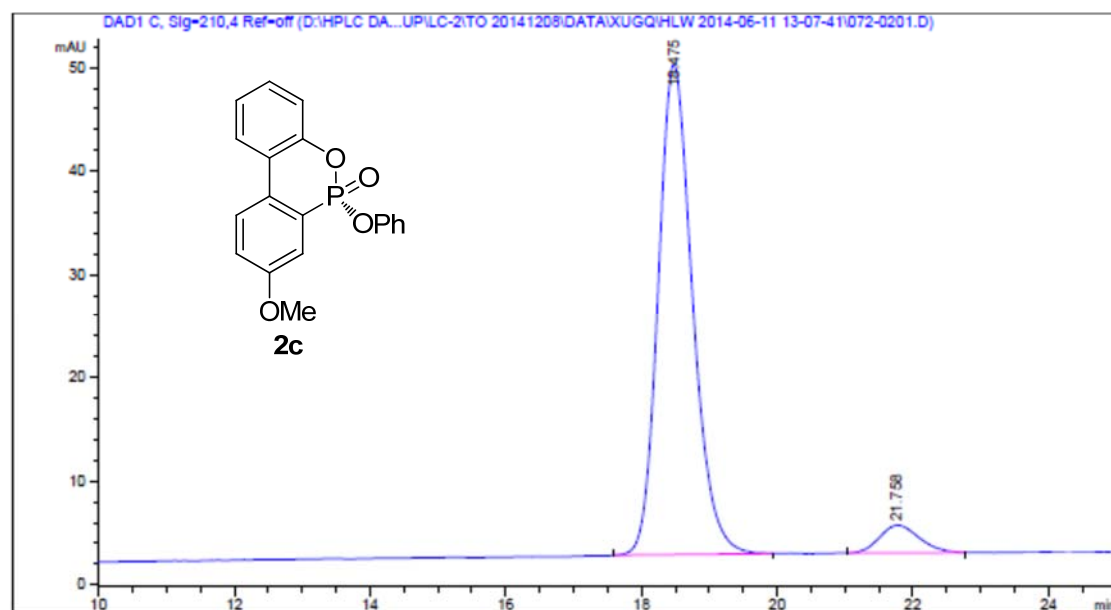

| 峰 # | 保留时间 [min] | 类型 | 峰宽 [min] | 峰面积 [mAU*s] | 峰高 [mAU] | 峰面积 %   |
|-----|------------|----|----------|-------------|----------|---------|
| 1   | 18.475     | BB | 0.5375   | 1663.58582  | 47.39788 | 93.8581 |
| 2   | 21.758     | BB | 0.4871   | 108.86111   | 2.68463  | 6.1419  |



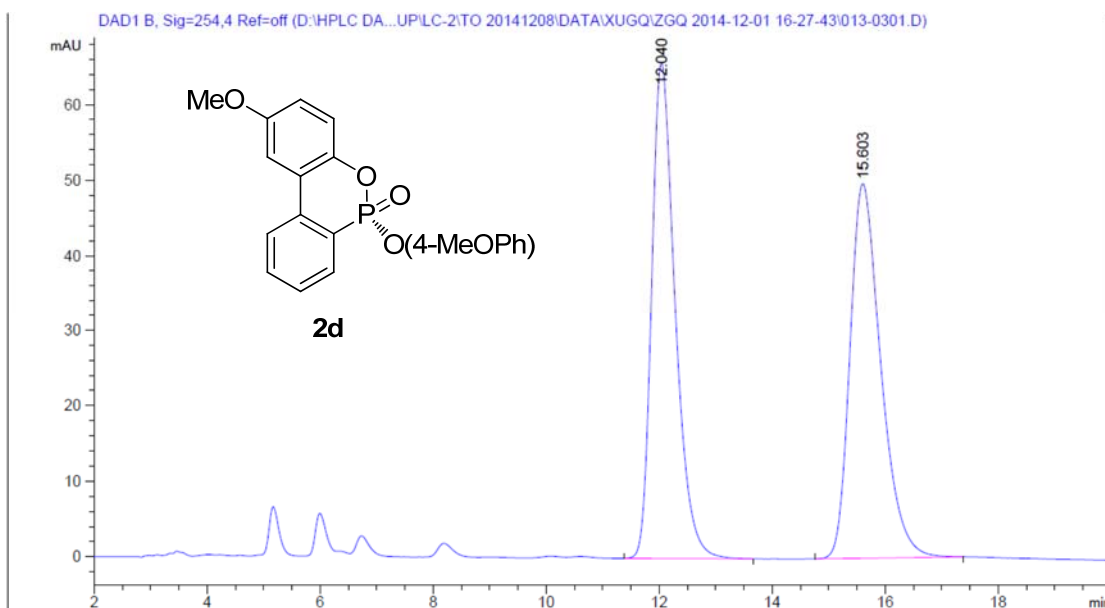

| 峰 # | 保留时间 [min] | 类型 | 峰宽 [min] | 峰面积 [mAU*s] | 峰高 [mAU] | 峰面积 %   |
|-----|------------|----|----------|-------------|----------|---------|
| 1   | 12.040     | BB | 0.4352   | 1890.72644  | 65.81521 | 50.1169 |
| 2   | 15.603     | BB | 0.5752   | 1881.90857  | 49.76174 | 49.8831 |

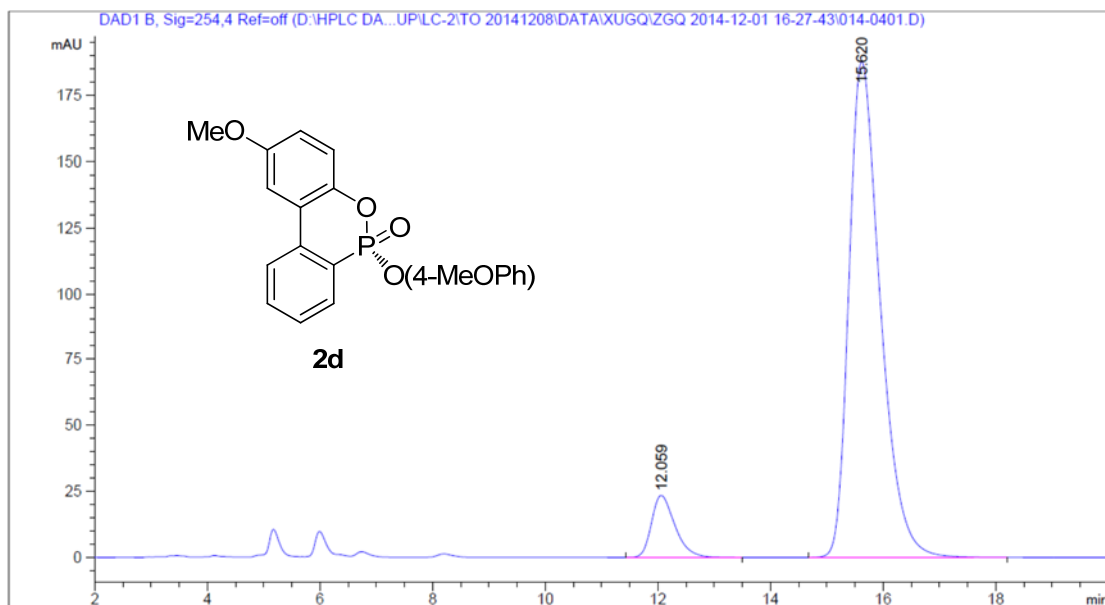

| 峰 # | 保留时间 [min] | 类型 | 峰宽 [min] | 峰面积 [mAU*s] | 峰高 [mAU]  | 峰面积 %   |
|-----|------------|----|----------|-------------|-----------|---------|
| 1   | 12.059     | BB | 0.4415   | 678.32086   | 23.44770  | 8.5399  |
| 2   | 15.620     | BB | 0.5874   | 7264.66113  | 187.77153 | 91.4601 |

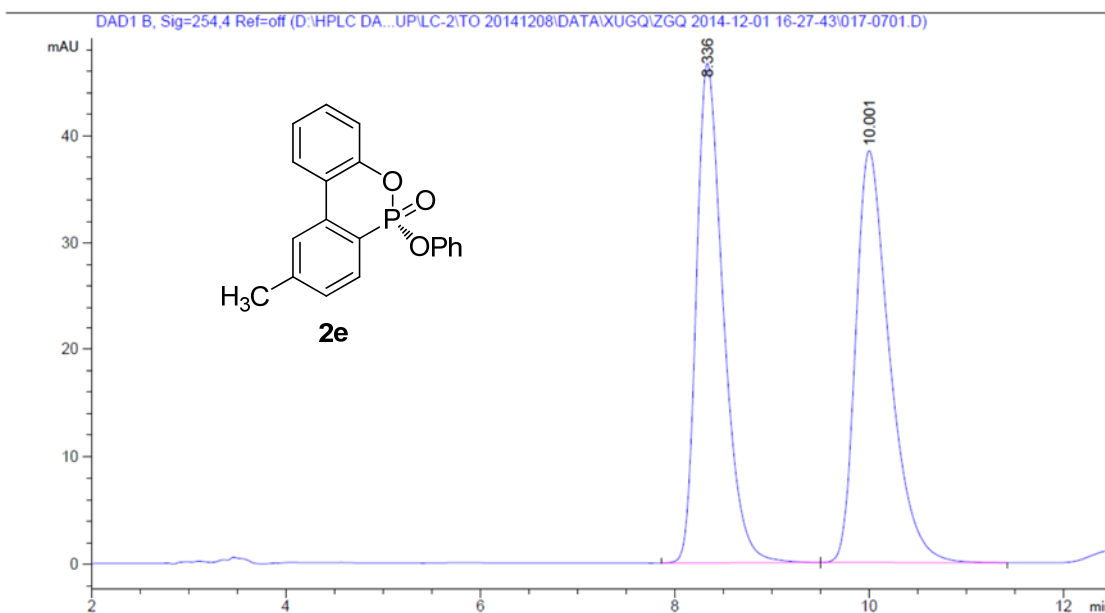

| 峰 # | 保留时间 [min] | 类型 | 峰宽 [min] | 峰面积 [mAU*s] | 峰高 [mAU] | 峰面积 %   |
|-----|------------|----|----------|-------------|----------|---------|
| 1   | 8.336      | BB | 0.2917   | 893.90137   | 46.61826 | 49.1007 |
| 2   | 10.001     | BB | 0.3612   | 926.64417   | 38.44072 | 50.8993 |

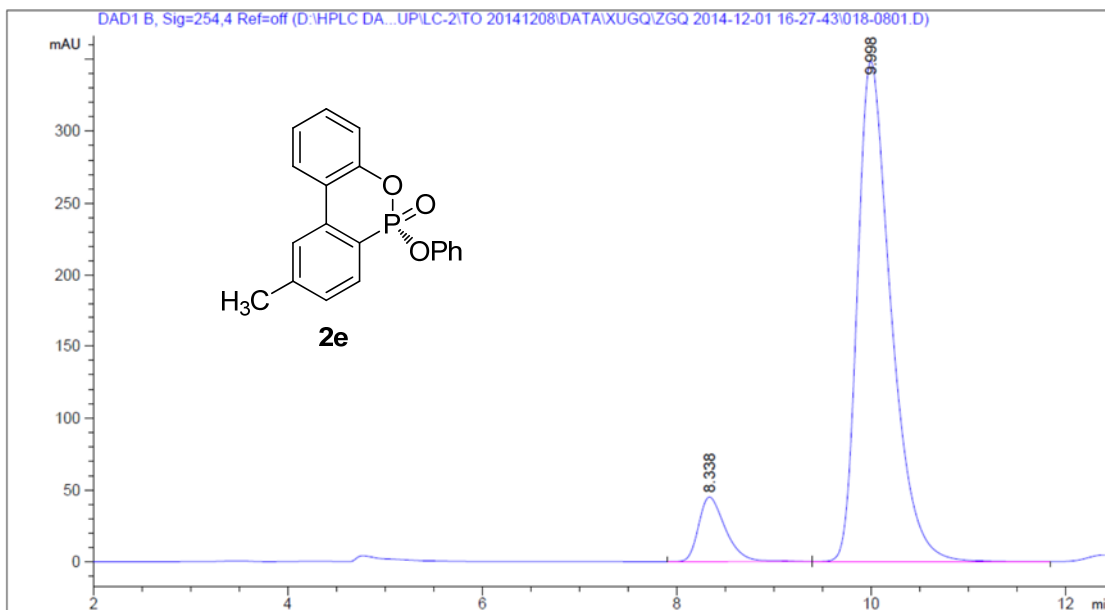

| 峰 # | 保留时间 [min] | 类型 | 峰宽 [min] | 峰面积 [mAU*s] | 峰高 [mAU]  | 峰面积 %   |
|-----|------------|----|----------|-------------|-----------|---------|
| 1   | 8.338      | BB | 0.2931   | 869.47882   | 45.06266  | 9.4446  |
| 2   | 9.998      | BB | 0.3592   | 8336.64648  | 348.40759 | 90.5554 |

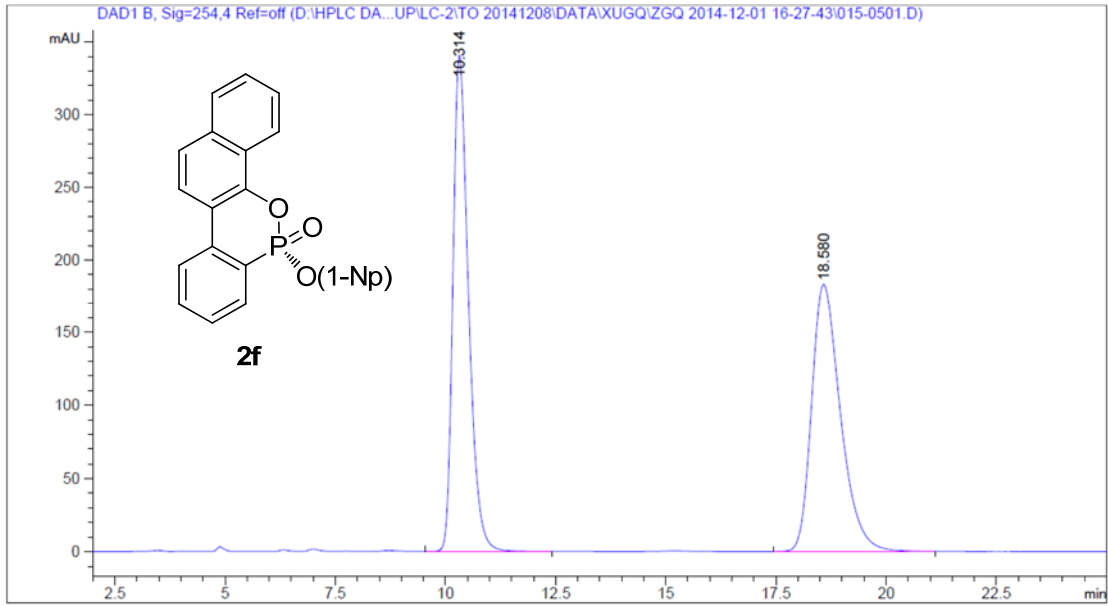

| 峰 # | 保留时间 [min] | 类型 | 峰宽 [min] | 峰面积 [mAU*s] | 峰高 [mAU]  | 峰面积 %   |
|-----|------------|----|----------|-------------|-----------|---------|
| 1   | 10.314     | BB | 0.3709   | 8321.04395  | 340.75812 | 50.0105 |
| 2   | 18.580     | BB | 0.6877   | 8317.56152  | 183.20532 | 49.9895 |

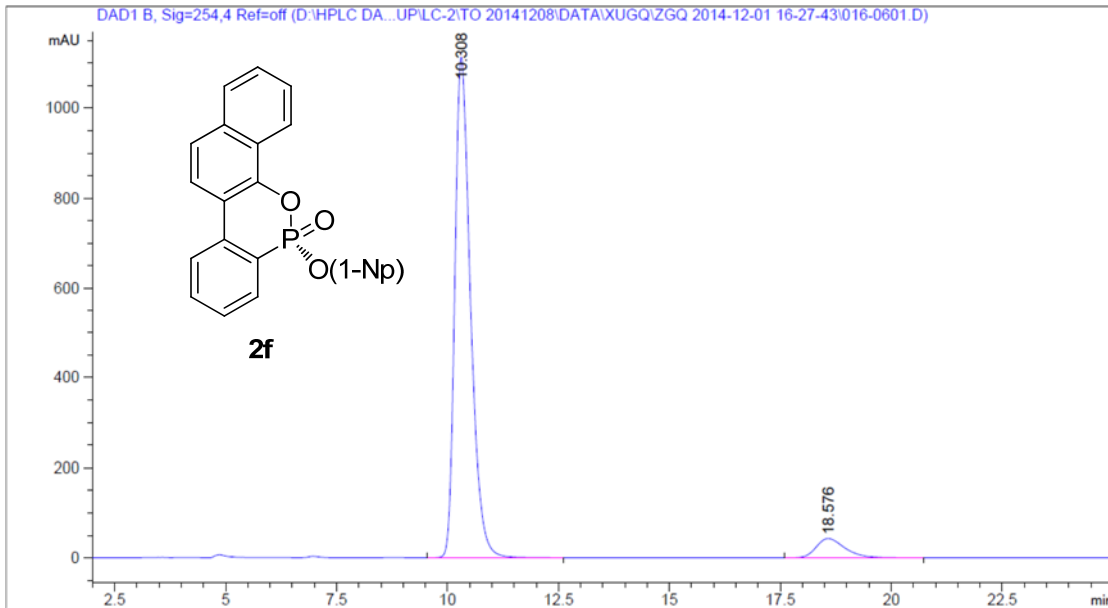

| 峰 # | 保留时间 [min] | 类型 | 峰宽 [min] | 峰面积 [mAU*s] | 峰高 [mAU]   | 峰面积 %   |
|-----|------------|----|----------|-------------|------------|---------|
| 1   | 10.308     | BB | 0.3720   | 2.72778e4   | 1112.67944 | 93.3706 |
| 2   | 18.576     | BB | 0.6729   | 1936.74463  | 43.04469   | 6.6294  |

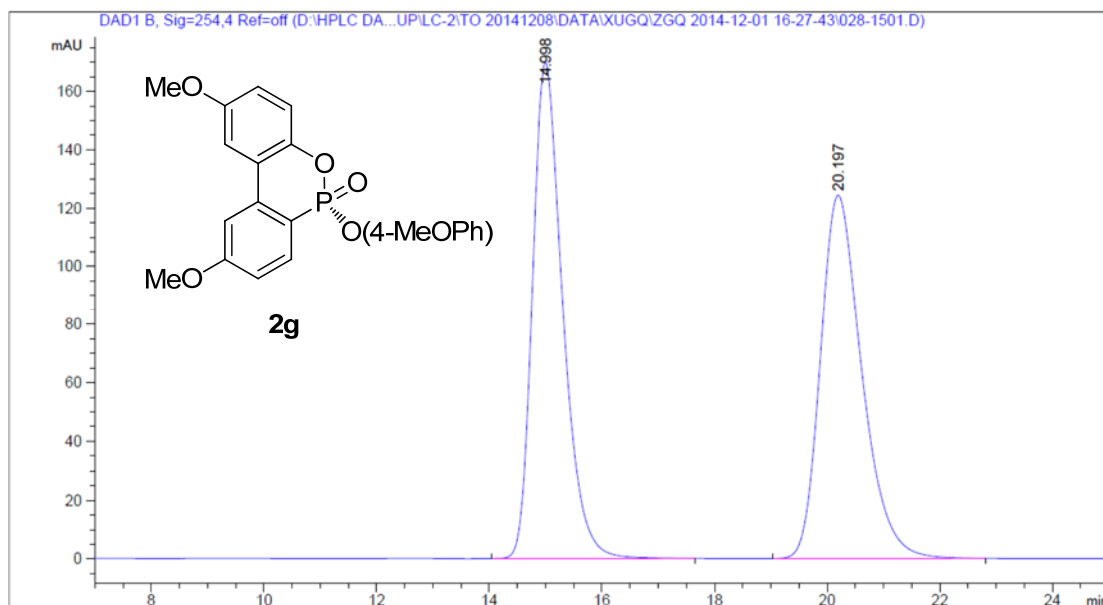

| 峰 # | 保留时间 [min] | 类型 | 峰宽 [min] | 峰面积 [mAU*s] | 峰高 [mAU]  | 峰面积 %   |
|-----|------------|----|----------|-------------|-----------|---------|
| 1   | 14.998     | BB | 0.5650   | 6303.42969  | 169.84343 | 49.9428 |
| 2   | 20.197     | BB | 0.7731   | 6317.86377  | 124.26816 | 50.0572 |

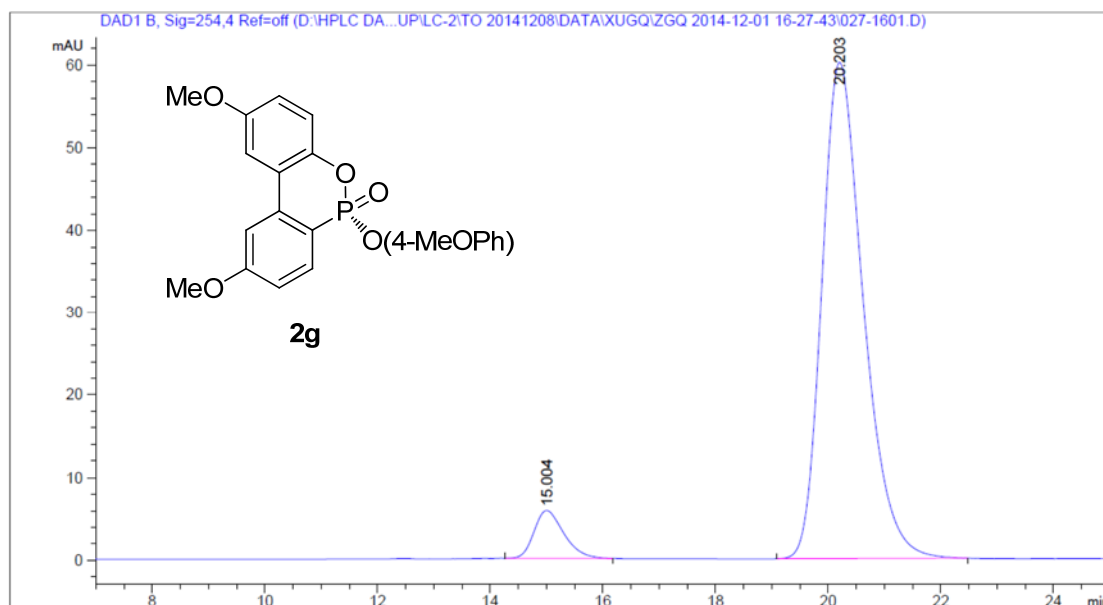

| 峰 # | 保留时间 [min] | 类型 | 峰宽 [min] | 峰面积 [mAU*s] | 峰高 [mAU] | 峰面积 %   |
|-----|------------|----|----------|-------------|----------|---------|
| 1   | 15.004     | BB | 0.5151   | 212.92143   | 5.78863  | 6.4893  |
| 2   | 20.203     | BB | 0.7797   | 3068.18213  | 60.09306 | 93.5107 |

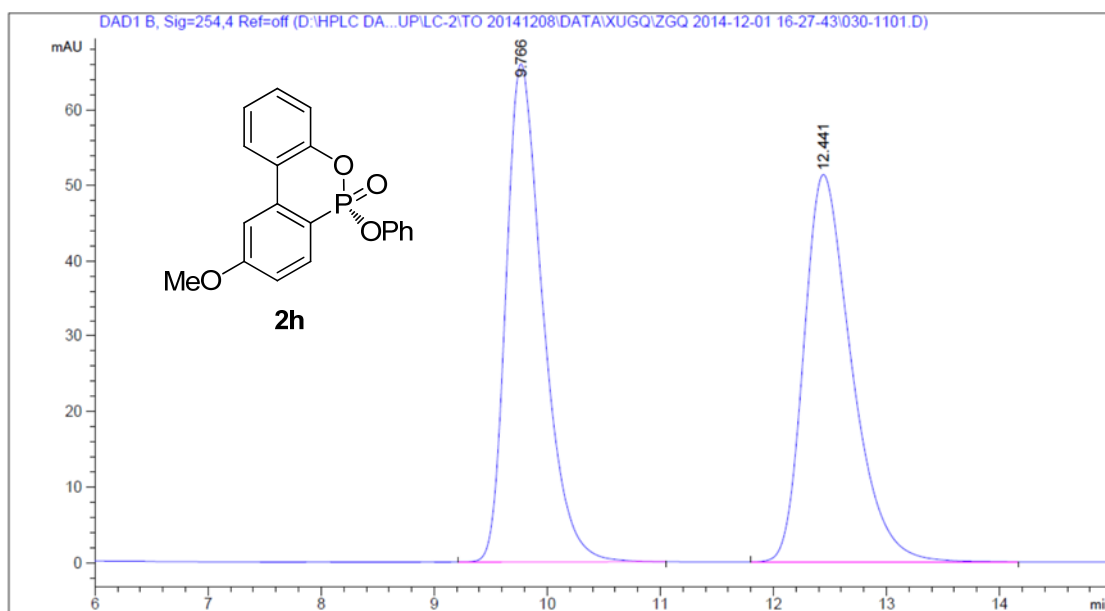

| 峰 # | 保留时间 [min] | 类型 | 峰宽 [min] | 峰面积 [mAU*s] | 峰高 [mAU] | 峰面积 %   |
|-----|------------|----|----------|-------------|----------|---------|
| 1   | 9.766      | BB | 0.3416   | 1491.37476  | 65.99689 | 49.8070 |
| 2   | 12.441     | BB | 0.4476   | 1502.93066  | 51.33106 | 50.1930 |

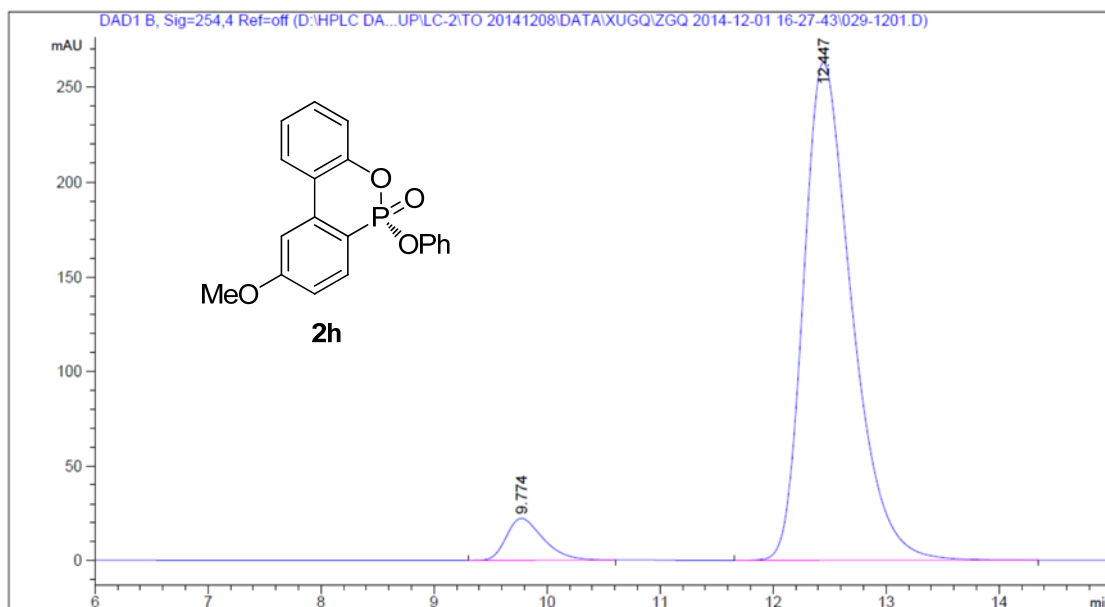

| 峰 # | 保留时间 [min] | 类型 | 峰宽 [min] | 峰面积 [mAU*s] | 峰高 [mAU]  | 峰面积 %   |
|-----|------------|----|----------|-------------|-----------|---------|
| 1   | 9.774      | BB | 0.3441   | 500.22464   | 22.09691  | 6.0326  |
| 2   | 12.447     | BB | 0.4518   | 7791.80273  | 262.88818 | 93.9674 |

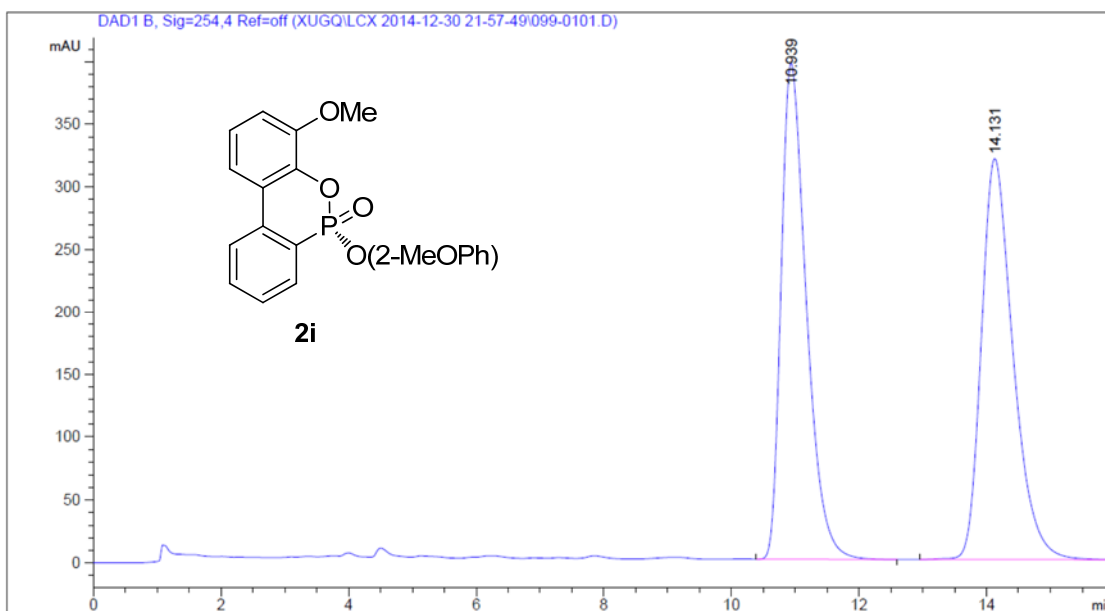

| 峰 # | 保留时间 [min] | 类型  | 峰宽 [min] | 峰面积 [mAU*s] | 峰高 [mAU]  | 峰面积 %   |
|-----|------------|-----|----------|-------------|-----------|---------|
| 1   | 10.939     | BB  | 0.4200   | 1.08641e4   | 396.10117 | 49.5540 |
| 2   | 14.131     | BBA | 0.5231   | 1.10597e4   | 320.09518 | 50.4460 |

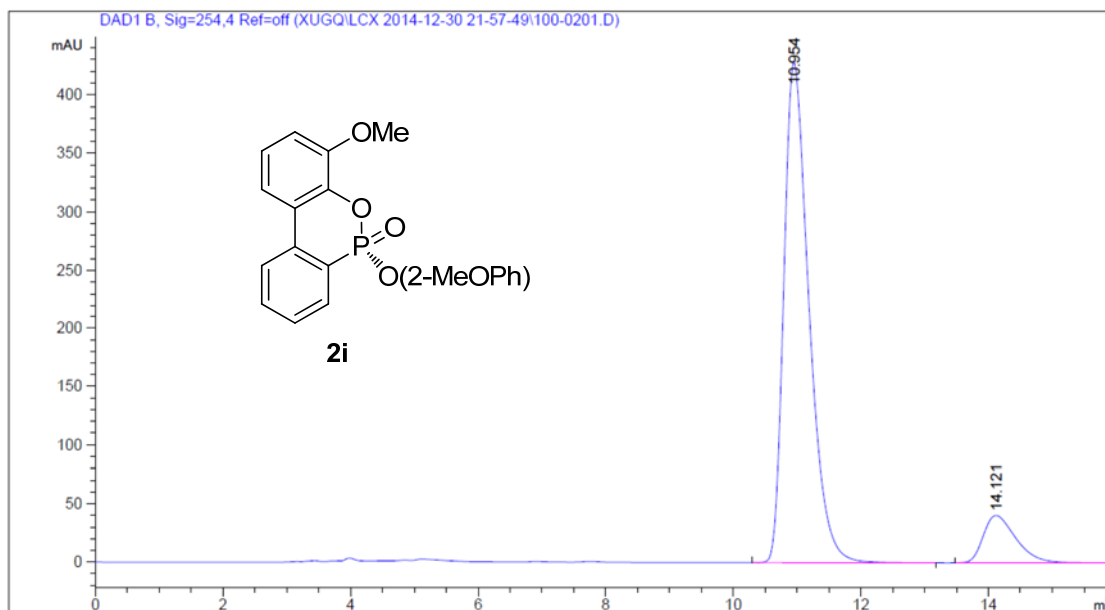

| 峰 # | 保留时间 [min] | 类型  | 峰宽 [min] | 峰面积 [mAU*s] | 峰高 [mAU]  | 峰面积 %   |
|-----|------------|-----|----------|-------------|-----------|---------|
| 1   | 10.954     | BB  | 0.4158   | 1.16673e4   | 428.31833 | 89.0327 |
| 2   | 14.121     | BBA | 0.5417   | 1437.20801  | 40.53434  | 10.9673 |

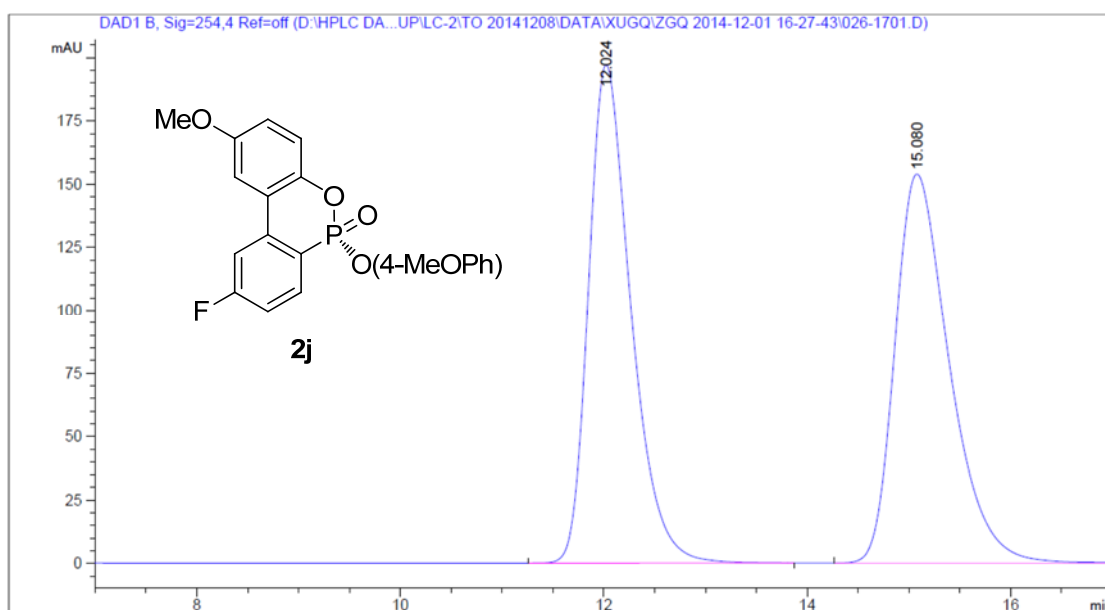

| 峰 # | 保留时间 [min] | 类型 | 峰宽 [min] | 峰面积 [mAU*s] | 峰高 [mAU]  | 峰面积 %   |
|-----|------------|----|----------|-------------|-----------|---------|
| 1   | 12.024     | BB | 0.4395   | 5699.89453  | 197.06105 | 50.0165 |
| 2   | 15.080     | BB | 0.5621   | 5696.13623  | 153.79773 | 49.9835 |

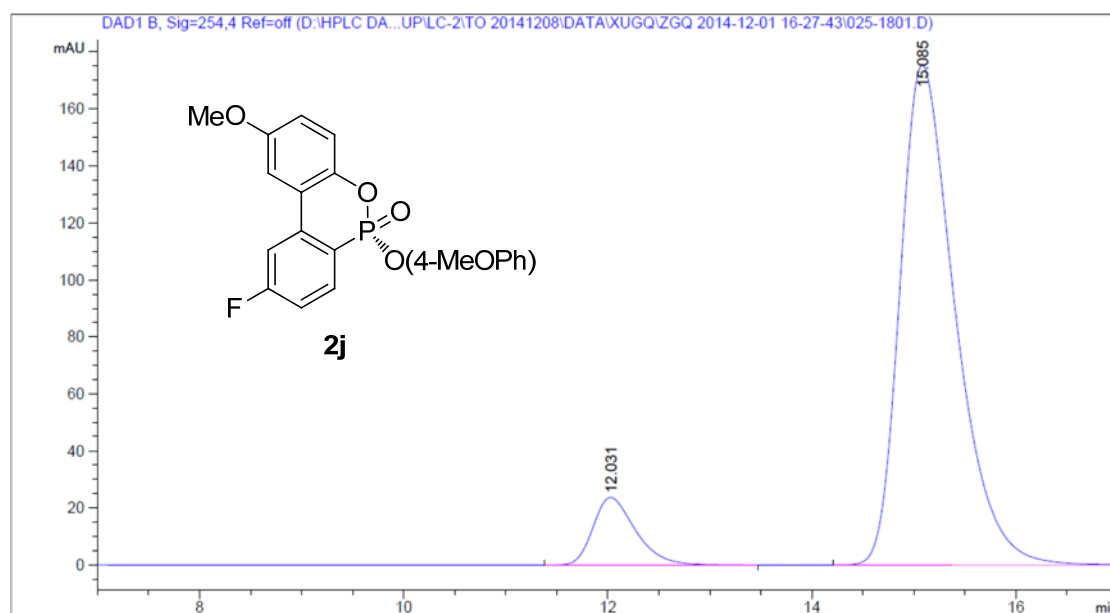

| 峰 # | 保留时间 [min] | 类型 | 峰宽 [min] | 峰面积 [mAU*s] | 峰高 [mAU]  | 峰面积 %   |
|-----|------------|----|----------|-------------|-----------|---------|
| 1   | 12.031     | BB | 0.4402   | 684.83386   | 23.62080  | 9.4646  |
| 2   | 15.085     | BB | 0.5700   | 6550.93311  | 175.29308 | 90.5354 |

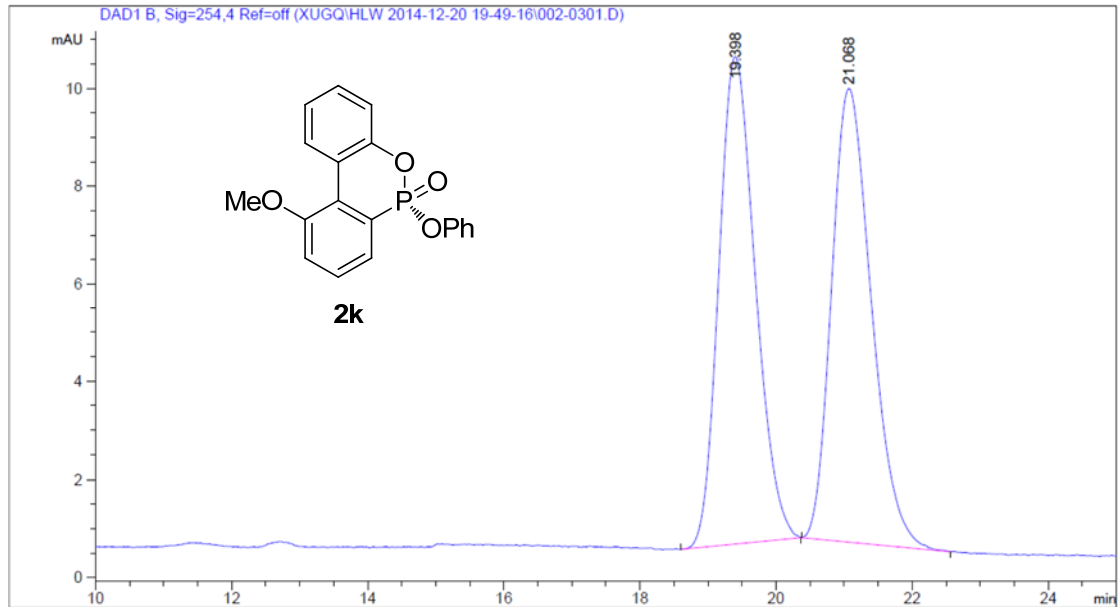

| 峰 # | 保留时间 [min] | 类型 | 峰宽 [min] | 峰面积 [mAU*s] | 峰高 [mAU] | 峰面积 %   |
|-----|------------|----|----------|-------------|----------|---------|
| 1   | 19.398     | BB | 0.5658   | 370.70523   | 9.96943  | 49.6680 |
| 2   | 21.068     | BB | 0.5925   | 375.66089   | 9.27501  | 50.3320 |

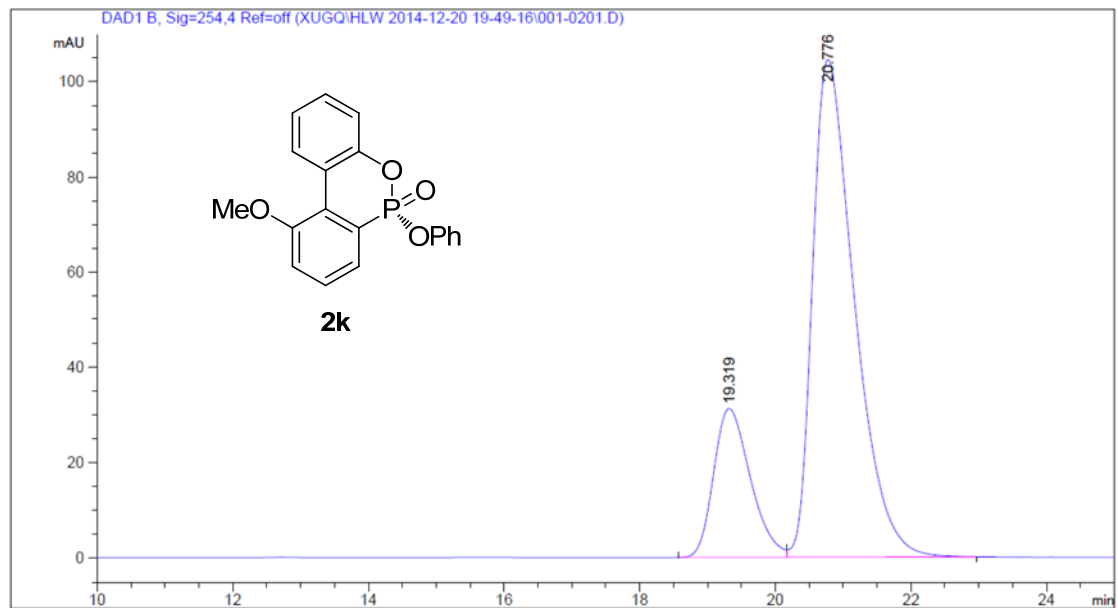

| 峰 # | 保留时间 [min] | 类型 | 峰宽 [min] | 峰面积 [mAU*s] | 峰高 [mAU]  | 峰面积 %   |
|-----|------------|----|----------|-------------|-----------|---------|
| 1   | 19.319     | BV | 0.5792   | 1170.59424  | 31.09806  | 20.7796 |
| 2   | 20.776     | VB | 0.6485   | 4462.78955  | 104.44370 | 79.2204 |



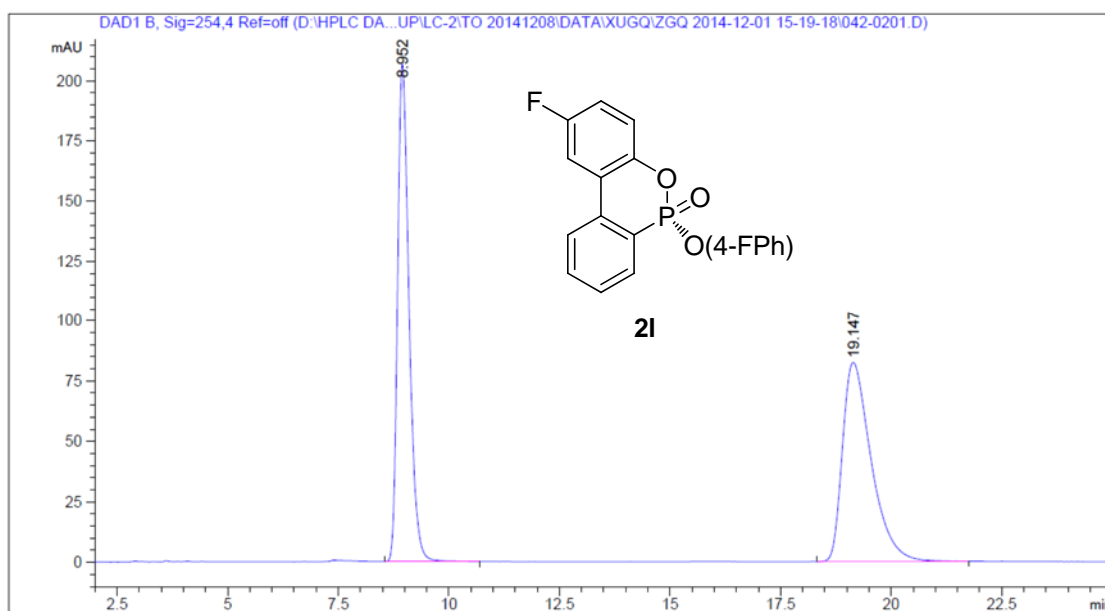

| 峰 # | 保留时间 [min] | 类型 | 峰宽 [min] | 峰面积 [mAU*s] | 峰高 [mAU]  | 峰面积 %   |
|-----|------------|----|----------|-------------|-----------|---------|
| 1   | 8.952      | BB | 0.2737   | 3714.48535  | 206.66362 | 50.0158 |
| 2   | 19.147     | BB | 0.6879   | 3712.14258  | 82.35204  | 49.9842 |

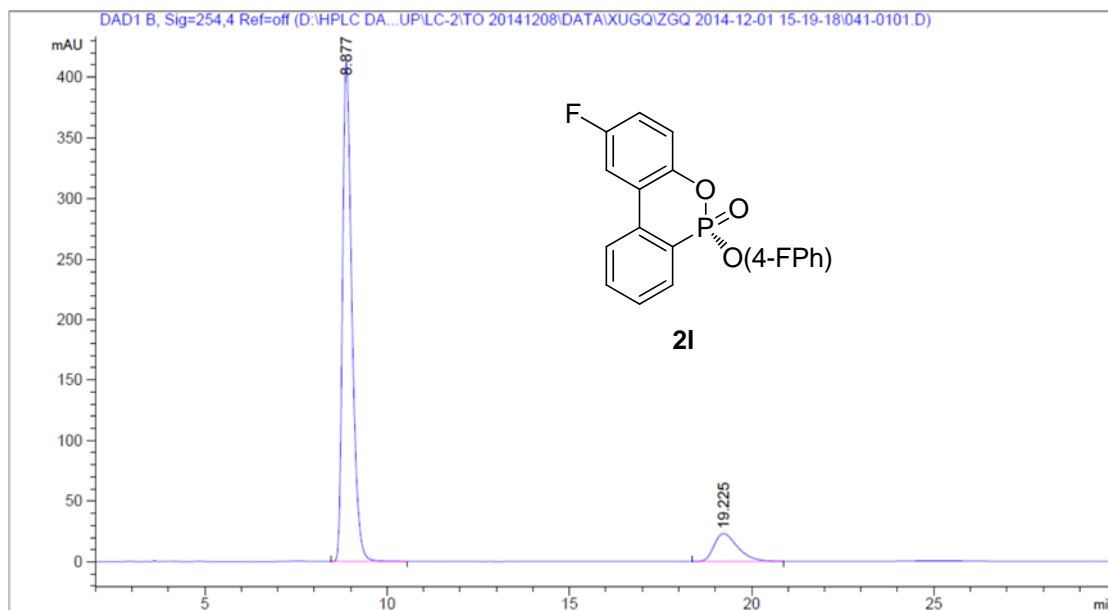

| 峰 # | 保留时间 [min] | 类型 | 峰宽 [min] | 峰面积 [mAU*s] | 峰高 [mAU]  | 峰面积 %   |
|-----|------------|----|----------|-------------|-----------|---------|
| 1   | 8.877      | BB | 0.2726   | 7373.39209  | 412.39771 | 87.7479 |
| 2   | 19.225     | BB | 0.6720   | 1029.53784  | 22.92013  | 12.2521 |

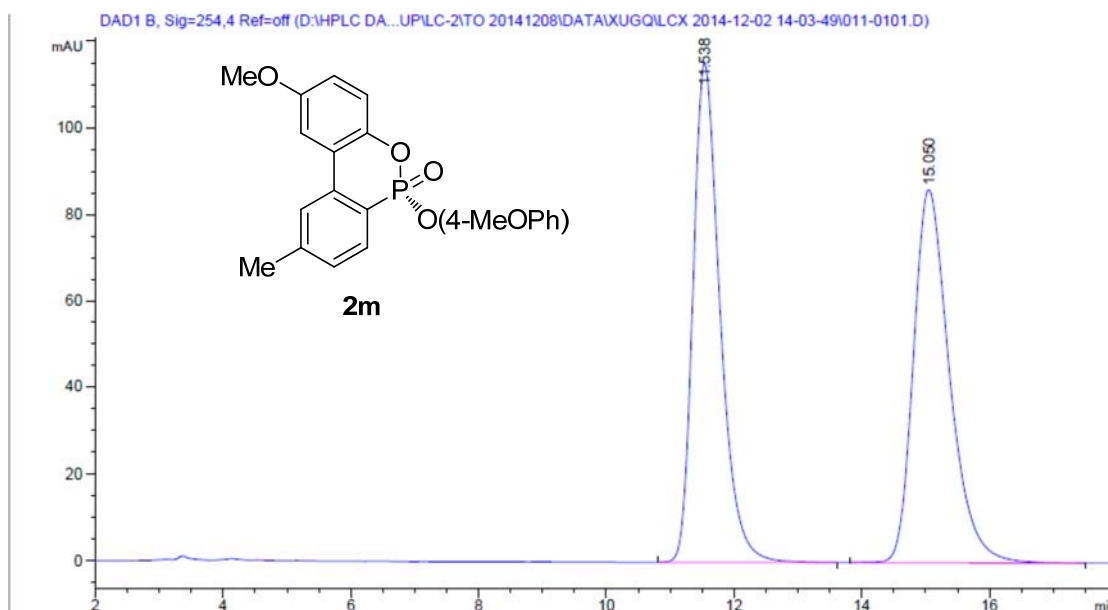

| 峰 # | 保留时间 [min] | 类型 | 峰宽 [min] | 峰面积 [mAU*s] | 峰高 [mAU]  | 峰面积 %   |
|-----|------------|----|----------|-------------|-----------|---------|
| 1   | 11.538     | BB | 0.4463   | 3384.24268  | 115.33861 | 50.0251 |
| 2   | 15.050     | BB | 0.5992   | 3380.84399  | 86.27750  | 49.9749 |

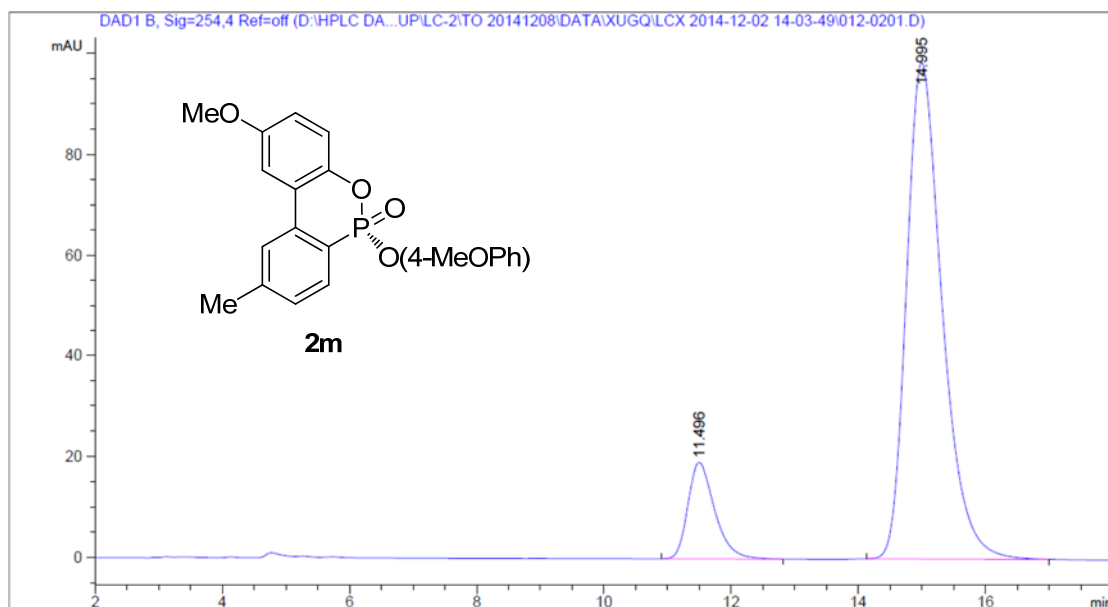

| 峰 # | 保留时间 [min] | 类型 | 峰宽 [min] | 峰面积 [mAU*s] | 峰高 [mAU] | 峰面积 %   |
|-----|------------|----|----------|-------------|----------|---------|
| 1   | 11.496     | BB | 0.4505   | 557.82233   | 19.00006 | 12.7091 |
| 2   | 14.995     | BB | 0.5941   | 3831.32715  | 98.44437 | 87.2909 |

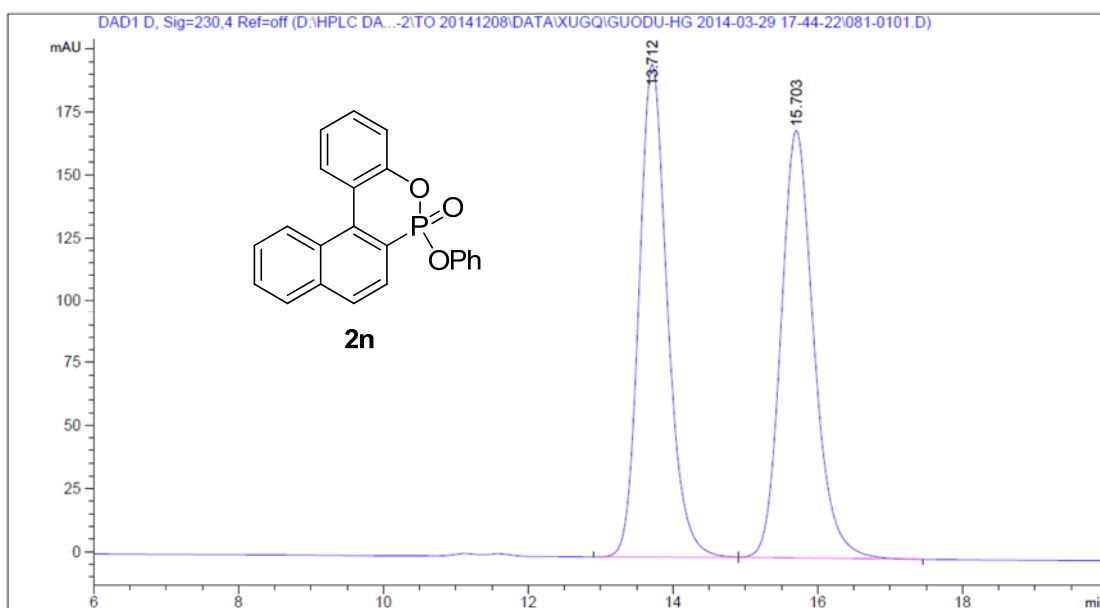

| 峰 # | 保留时间 [min] | 类型 | 峰宽 [min] | 峰面积 [mAU*s] | 峰高 [mAU]  | 峰面积 %   |
|-----|------------|----|----------|-------------|-----------|---------|
| 1   | 13.712     | BB | 0.4158   | 5312.53125  | 196.24107 | 49.8917 |
| 2   | 15.703     | BB | 0.4801   | 5335.60400  | 170.02783 | 50.1083 |

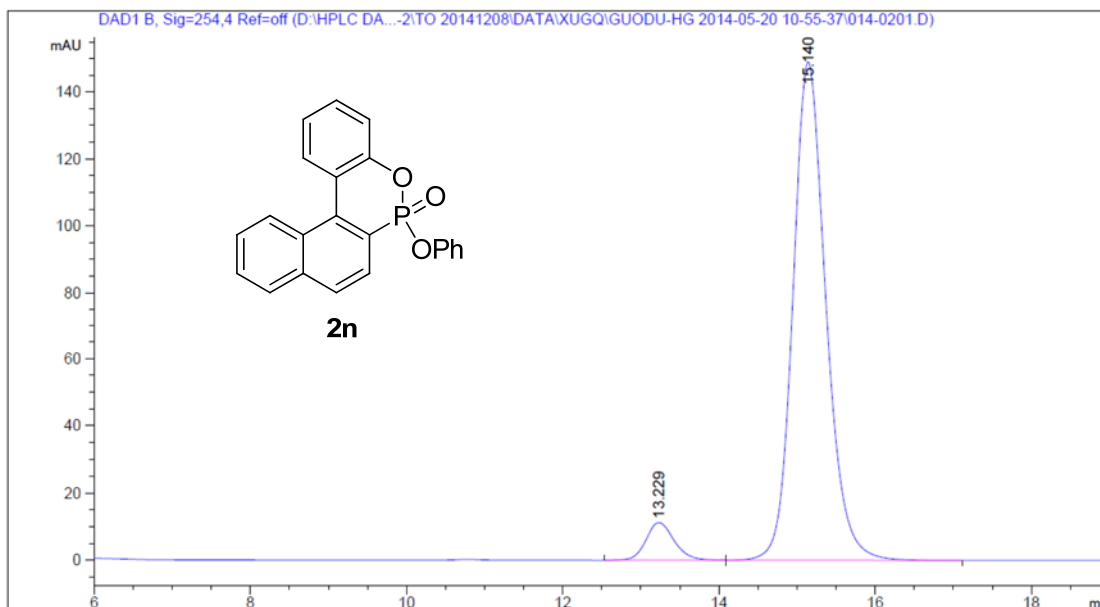

| 峰 # | 保留时间 [min] | 类型 | 峰宽 [min] | 峰面积 [mAU*s] | 峰高 [mAU]  | 峰面积 %   |
|-----|------------|----|----------|-------------|-----------|---------|
| 1   | 13.229     | BB | 0.3814   | 281.63165   | 11.27467  | 6.0725  |
| 2   | 15.140     | BB | 0.4470   | 4356.17383  | 149.03377 | 93.9275 |

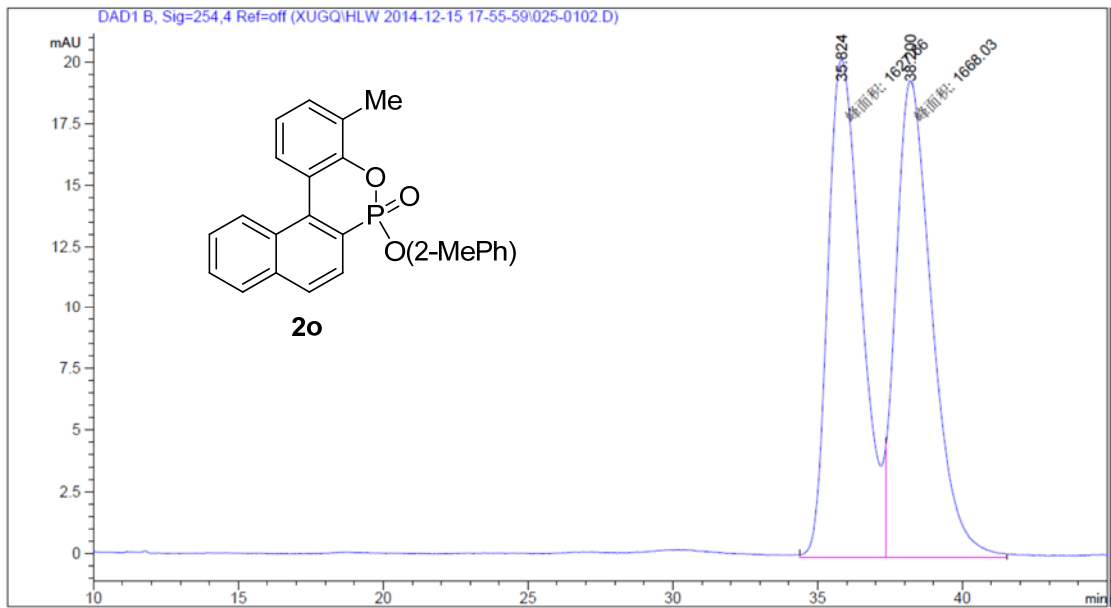

| 峰 # | 保留时间 [min] | 类型 | 峰宽 [min] | 峰面积 [mAU*s] | 峰高 [mAU] | 峰面积 %   |
|-----|------------|----|----------|-------------|----------|---------|
| 1   | 35.824     | MF | 1.3377   | 1627.66113  | 20.27981 | 49.3876 |
| 2   | 38.200     | FM | 1.4334   | 1668.02856  | 19.39507 | 50.6124 |

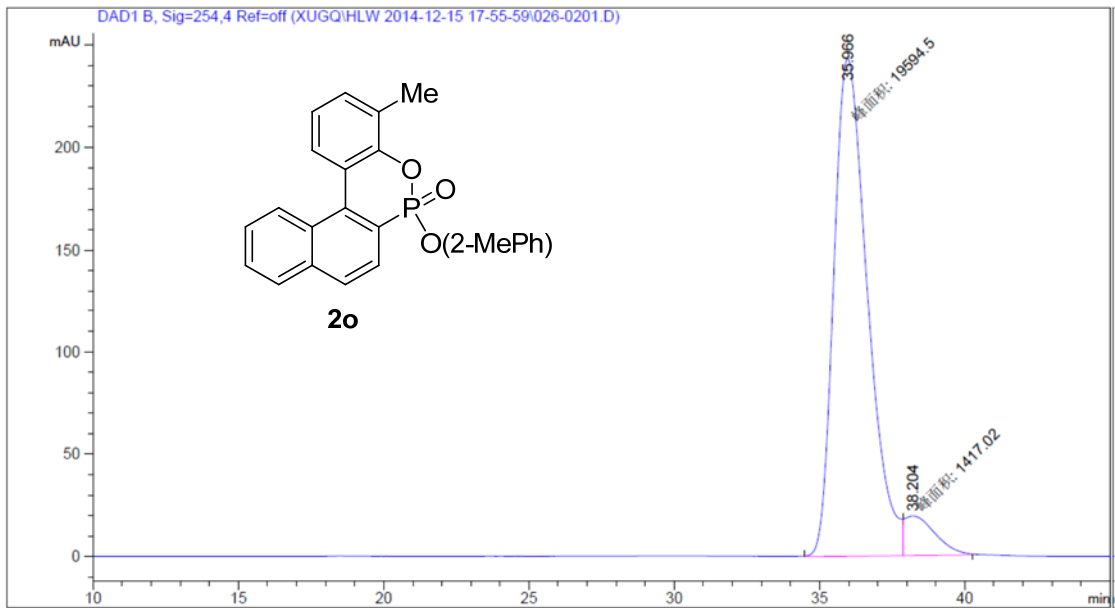

| 峰 # | 保留时间 [min] | 类型 | 峰宽 [min] | 峰面积 [mAU*s] | 峰高 [mAU]  | 峰面积 %   |
|-----|------------|----|----------|-------------|-----------|---------|
| 1   | 35.966     | MF | 1.3425   | 1.95945e4   | 243.26334 | 93.2560 |
| 2   | 38.204     | FM | 1.2215   | 1417.01563  | 19.33442  | 6.7440  |

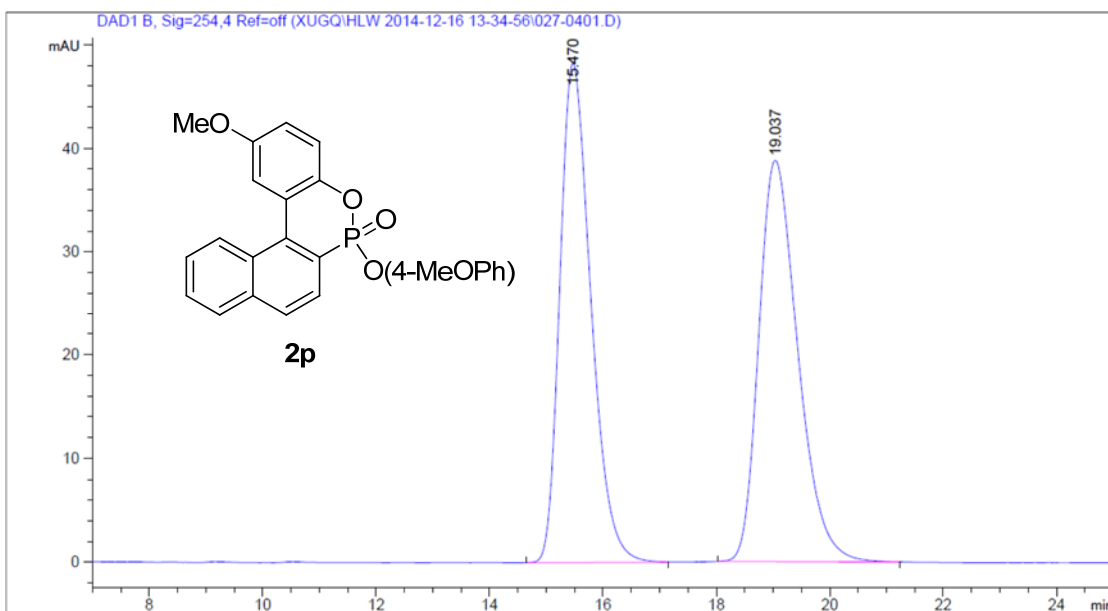

| 峰 # | 保留时间 [min] | 类型 | 峰宽 [min] | 峰面积 [mAU*s] | 峰高 [mAU] | 峰面积 %   |
|-----|------------|----|----------|-------------|----------|---------|
| 1   | 15.470     | BB | 0.5863   | 1829.17786  | 48.25369 | 49.7075 |
| 2   | 19.037     | BB | 0.7271   | 1850.70313  | 38.75734 | 50.2925 |

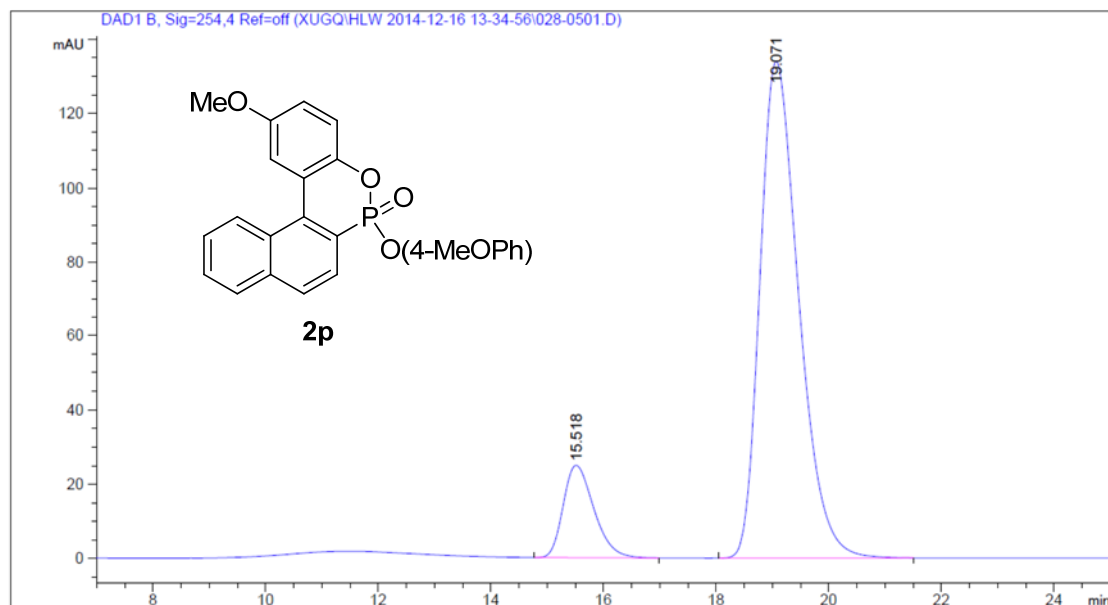

| 峰 # | 保留时间 [min] | 类型 | 峰宽 [min] | 峰面积 [mAU*s] | 峰高 [mAU]  | 峰面积 %   |
|-----|------------|----|----------|-------------|-----------|---------|
| 1   | 15.518     | BB | 0.5744   | 941.60693   | 24.83398  | 12.8393 |
| 2   | 19.071     | BB | 0.7332   | 6392.18896  | 133.84178 | 87.1607 |

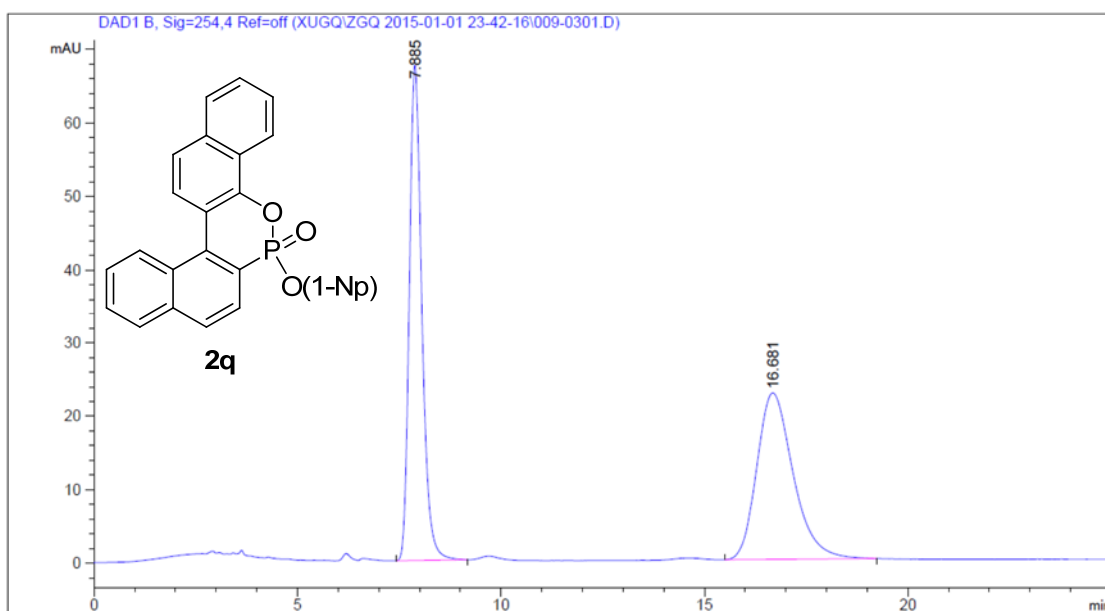

| 峰 # | 保留时间 [min] | 类型 | 峰宽 [min] | 峰面积 [mAU*s] | 峰高 [mAU] | 峰面积 %   |
|-----|------------|----|----------|-------------|----------|---------|
| 1   | 7.885      | BB | 0.3274   | 1443.62732  | 67.52410 | 50.6353 |
| 2   | 16.681     | BB | 0.9033   | 1407.40051  | 22.63987 | 49.3647 |

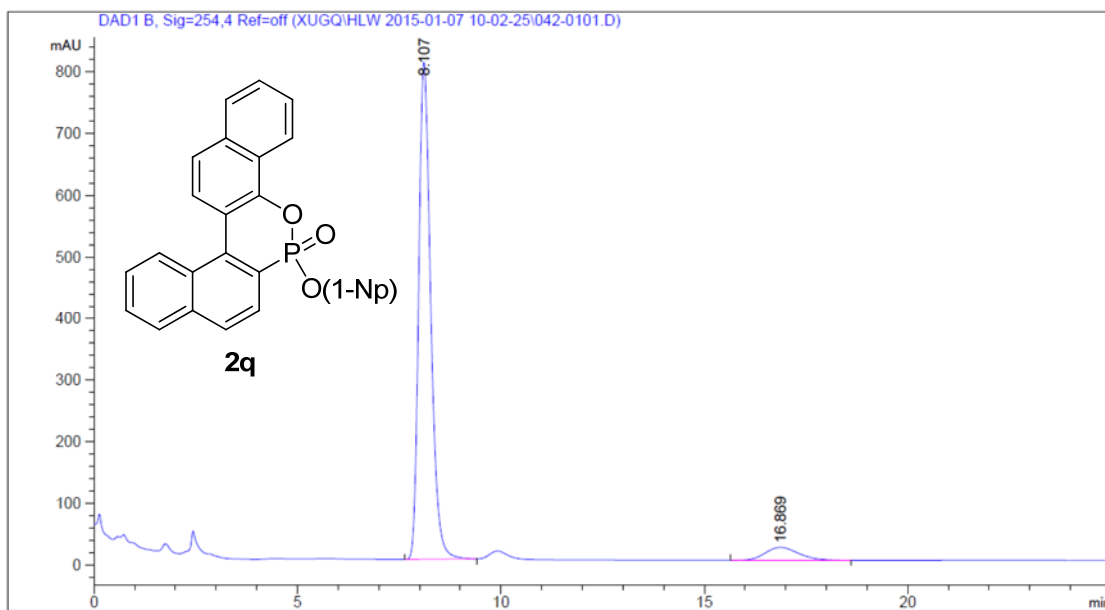

| 峰 # | 保留时间 [min] | 类型 | 峰宽 [min] | 峰面积 [mAU*s] | 峰高 [mAU]  | 峰面积 %   |
|-----|------------|----|----------|-------------|-----------|---------|
| 1   | 8.107      | BB | 0.3144   | 1.64460e4   | 804.81317 | 93.1566 |
| 2   | 16.869     | BB | 0.8599   | 1208.14343  | 20.97712  | 6.8434  |

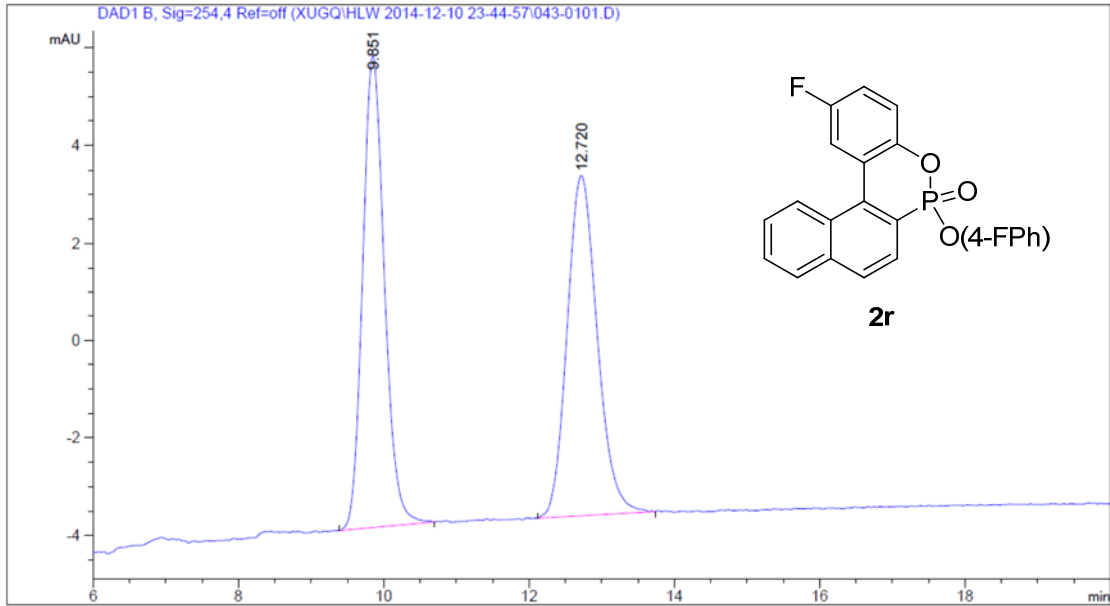

| 峰 # | 保留时间 [min] | 类型 | 峰宽 [min] | 峰面积 [mAU*s] | 峰高 [mAU] | 峰面积 %   |
|-----|------------|----|----------|-------------|----------|---------|
| 2   | 9.851      | BB | 0.3225   | 201.15520   | 9.67649  | 49.2637 |
| 3   | 12.720     | BB | 0.4359   | 201.28873   | 6.99166  | 49.2964 |

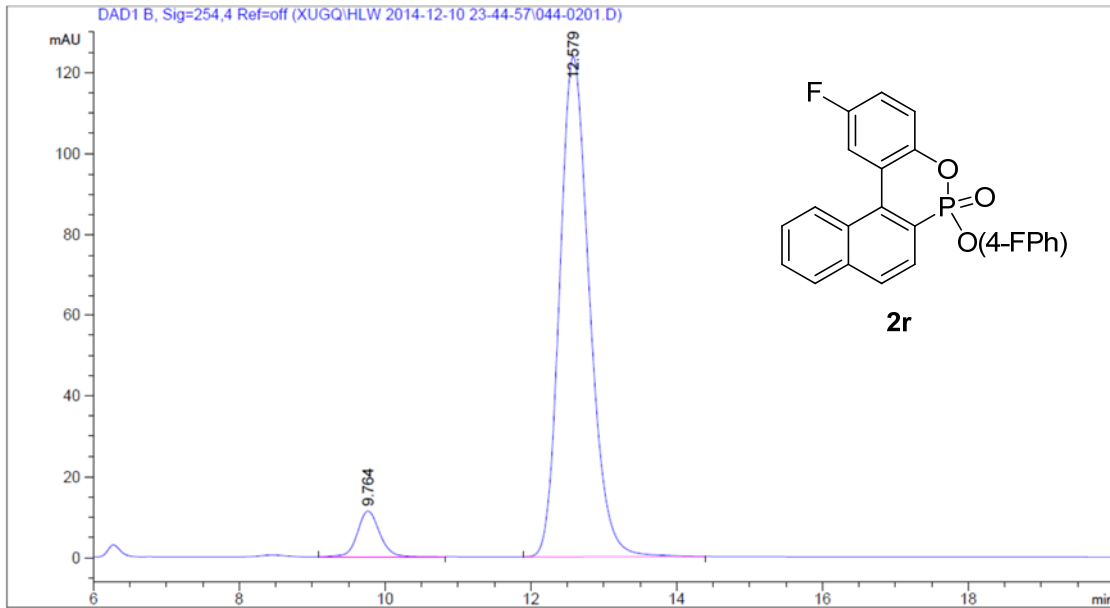

| 峰 # | 保留时间 [min] | 类型 | 峰宽 [min] | 峰面积 [mAU*s] | 峰高 [mAU]  | 峰面积 %   |
|-----|------------|----|----------|-------------|-----------|---------|
| 1   | 9.764      | BB | 0.3266   | 240.10005   | 11.36035  | 6.4200  |
| 2   | 12.579     | BB | 0.4360   | 3499.78052  | 123.73879 | 93.5800 |

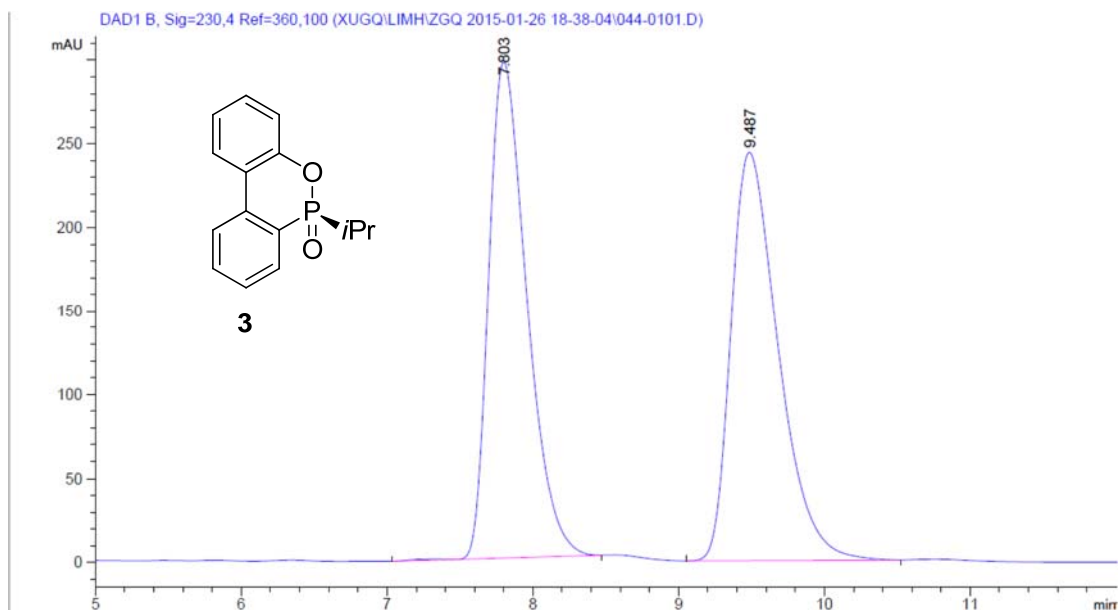

| 峰 # | 保留时间 [min] | 类型 | 峰宽 [min] | 峰面积 [mAU*s] | 峰高 [mAU]   | 峰面积 %   |
|-----|------------|----|----------|-------------|------------|---------|
| 1   | 7.802      | VV | 0.2931   | 3.15191e4   | 1663.10193 | 49.6574 |
| 2   | 9.487      | BV | 0.3540   | 3.19540e4   | 1390.94507 | 50.3426 |

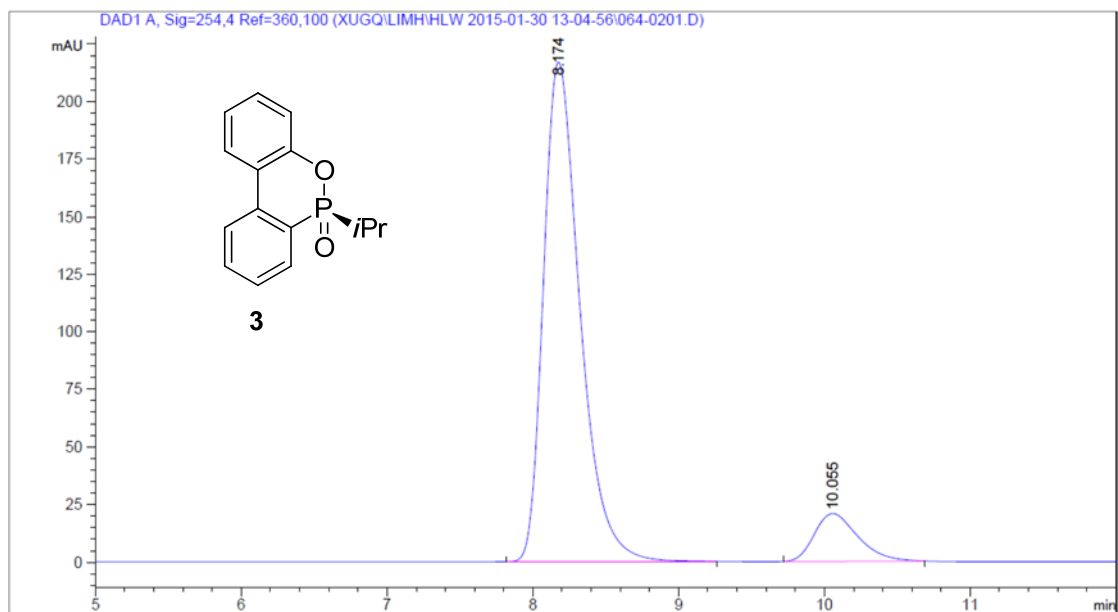

| 峰 # | 保留时间 [min] | 类型   | 峰宽 [min] | 峰面积 [mAU*s] | 峰高 [mAU]  | 峰面积 %   |
|-----|------------|------|----------|-------------|-----------|---------|
| 1   | 8.174      | MM R | 0.2896   | 3770.82056  | 217.02008 | 89.7536 |
| 2   | 10.055     | MM R | 0.3465   | 430.48071   | 20.70328  | 10.2464 |



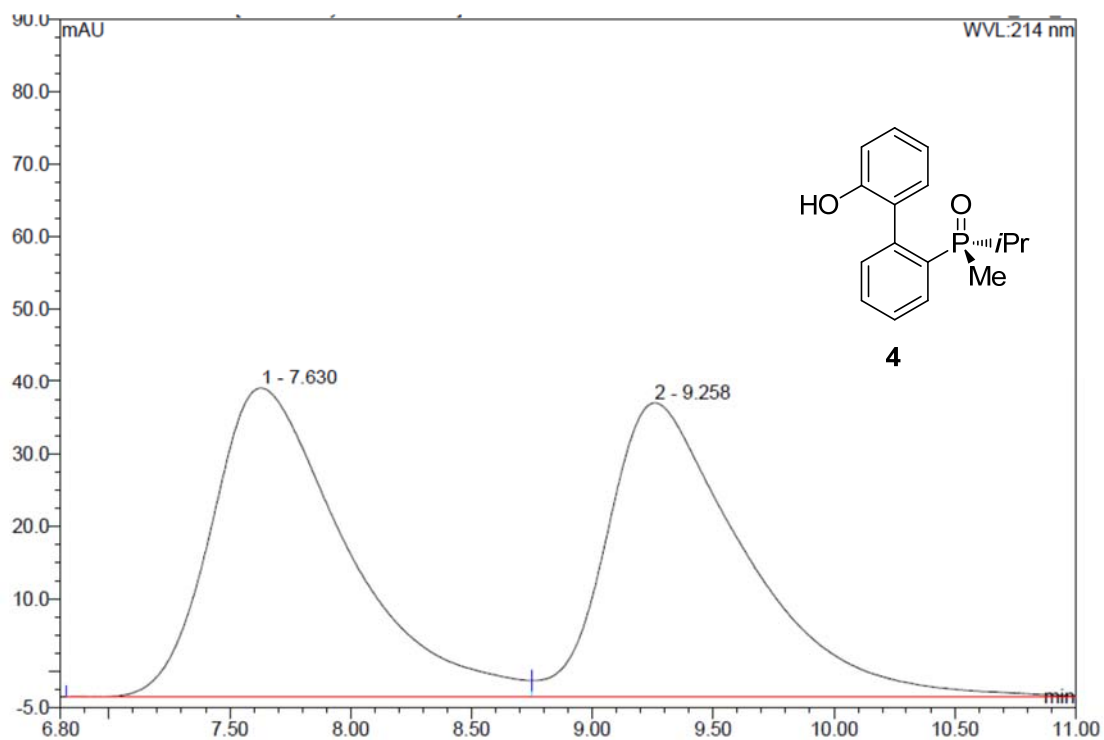

| No. | Ret.Time<br>min | Peak Name | Height<br>mAU | Area<br>mAU*min | Rel.Area<br>% | Amount | Type |
|-----|-----------------|-----------|---------------|-----------------|---------------|--------|------|
| 1   | 7.63            | n.a.      | 42.502        | 27.440          | 50.67         | n.a.   | BM * |
| 2   | 9.26            | n.a.      | 40.455        | 26.717          | 49.33         | n.a.   | MB*  |

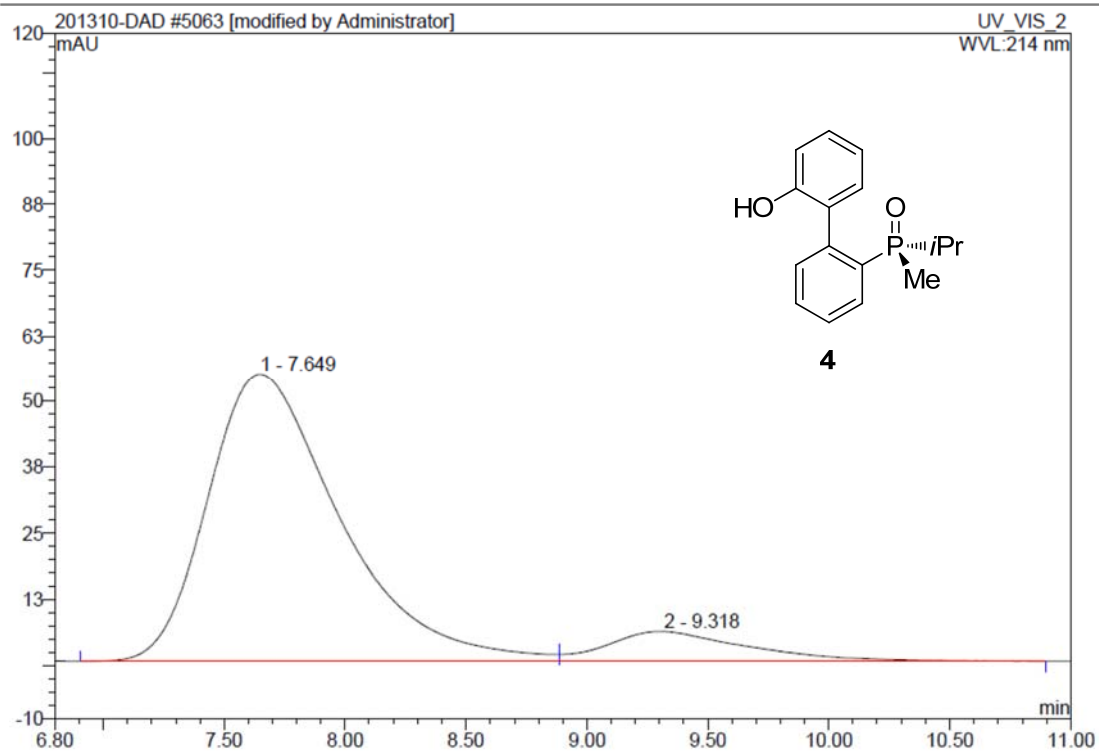

| No. | Ret.Time<br>min | Peak Name | Height<br>mAU | Area<br>mAU*min | Rel.Area<br>% | Amount | Type |
|-----|-----------------|-----------|---------------|-----------------|---------------|--------|------|
| 1   | 7.65            | n.a.      | 54.344        | 34.386          | 90.06         | n.a.   | M *  |
| 2   | 9.32            | n.a.      | 5.658         | 3.794           | 9.94          | n.a.   | MB*  |

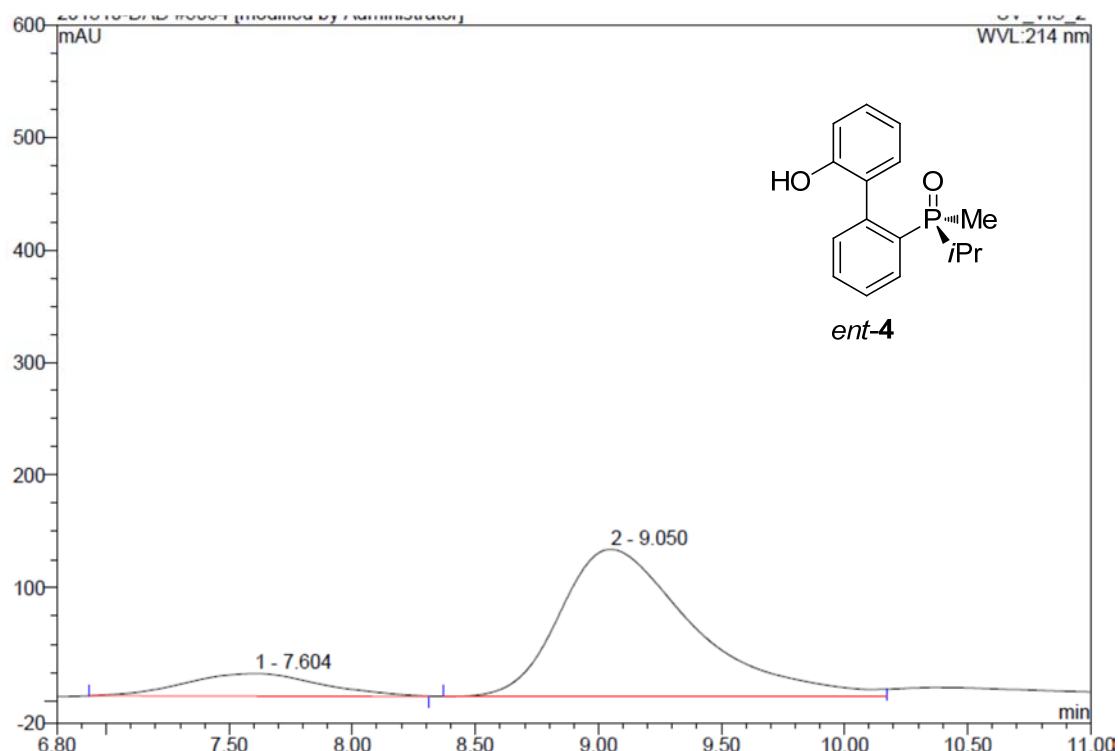

| No. | Ret.Time<br>min | Peak Name | Height<br>mAU | Area<br>mAU*min | Rel.Area<br>% | Amount | Type |
|-----|-----------------|-----------|---------------|-----------------|---------------|--------|------|
| 1   | 7.60            | n.a.      | 20.123        | 12.747          | 13.47         | n.a.   | BM * |
| 2   | 9.05            | n.a.      | 130.404       | 81.886          | 86.53         | n.a.   | BM * |

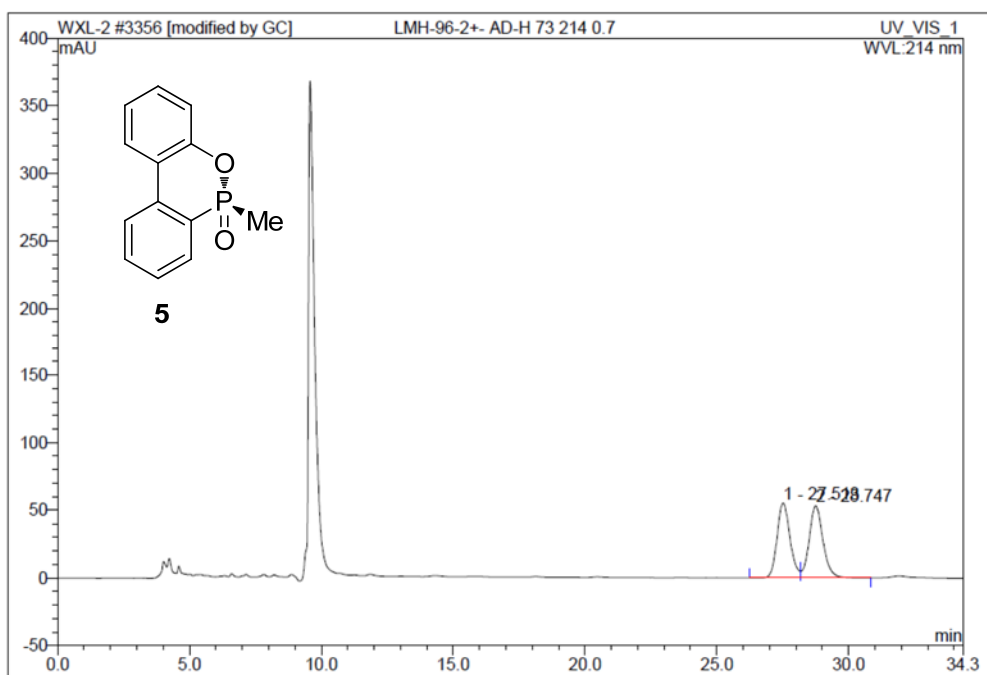

| No. | Ret.Time<br>min | Peak Name | Height<br>mAU | Area<br>mAU*min | Rel.Area<br>% | Amount | Type |
|-----|-----------------|-----------|---------------|-----------------|---------------|--------|------|
| 1   | 27.51           | n.a.      | 55.155        | 31.316          | 49.17         | n.a.   | BM * |
| 2   | 28.75           | n.a.      | 53.170        | 32.373          | 50.83         | n.a.   | MB*  |

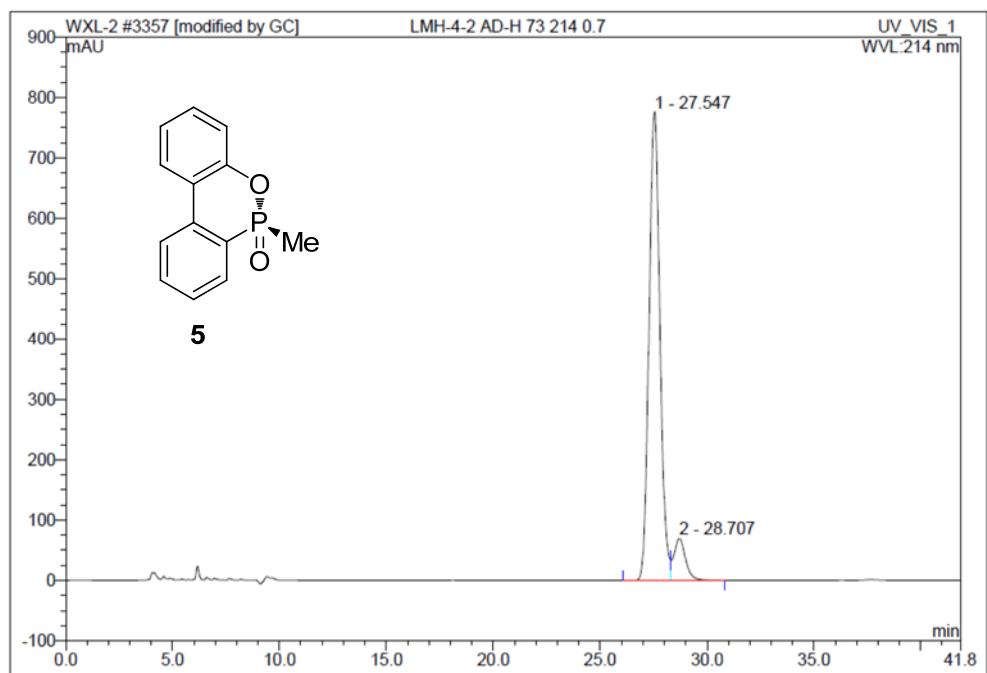

| No. | Ret.Time<br>min | Peak Name | Height<br>mAU | Area<br>mAU*min | Rel.Area<br>% | Amount | Type |
|-----|-----------------|-----------|---------------|-----------------|---------------|--------|------|
| 1   | 27.55           | n.a.      | 776.639       | 459.768         | 91.21         | n.a.   | BM*  |
| 2   | 28.71           | n.a.      | 69.346        | 44.296          | 8.79          | n.a.   | MB*  |
